# Supplementary material for: Cooperation of mitochondrial and ER factors in quality control of tail-anchored proteins
Source: eLife journal article supplement (doi:10.7554/elife.45506), 2019-06-07
Supplement: supp [file elife-45506-supp-v1.zip]

Archive with 11 entries (11 files):
- elife_poa_e45506_Figure_4_figure_supplement_1.pdf
- elife_poa_e45506_Figure_3_figure_supplement_1.pdf
- elife_poa_e45506_Supplementary_File_4.docx
- elife_poa_e45506_Figure_6_figure_supplement_1.pdf
- elife_poa_e45506_Figure_5_figure_supplement_1.pdf
- elife_poa_e45506_Transparent_Reporting_File.pdf
- elife_poa_e45506_Supplementary_File_2.docx
- elife_poa_e45506_Supplementary_File_3.docx
- elife_poa_e45506_Supplementary_File_1.xlsx
- elife_poa_e45506_Figure_2_figure_supplement_1.pdf
- elife_poa_e45506_Figure_1_figure_supplement_1.pdf
