# Supplementary material for: Cooperation of mitochondrial and ER factors in quality control of tail-anchored proteins
Source: eLife journal article supplement (doi:10.7554/elife.45506), 2019-06-07
Supplement: supp [file elife-45506-supp-v1.zip › elife_poa_e45506_Supplementary_File_1.xlsx]

## Sheet: tFT-Pex15delta30
ORF	Gene Name	n	GFP.mean	GFP.sd	GFP.pval	mCherry.mean	mCherry.sd	mCherry.pval	ratio.mean	ratio.sd	ratio.pval
YBR269C	SDH8	4	0.183665	0.102253	0.0911047	0.300855	0.554071	0.679492	0.257468	0.57013	0.780482
YBR271W	EFM2	4	-0.408538	0.420046	0.234528	0.531737	0.713767	0.567882	0.710936	0.750354	0.555611
YBR273C	UBX7	4	1.65565	0.994484	0.103617	0.595198	1.38041	0.74752	0.0263014	1.06955	0.989743
YBR274W	CHK1	4	-0.808814	0.24268	0.0326466	-0.627414	0.958856	0.619223	-0.339804	1.0145	0.83573
YBR281C	DUG2	4	0.397682	0.254315	0.113284	0.680873	0.415886	0.271178	0.571859	0.461067	0.434783
YBR283C	SSH1	4	0.709953	0.282975	0.0519045	2.6497	0.756903	0.0893061	2.49013	0.782372	0.112192
YBR284W	YBR284W	4	-0.423841	0.16379	0.0492298	-0.31769	0.702143	0.736367	-0.16008	0.718826	0.893177
YBR285W	YBR285W	4	-1.16387	0.215148	0.0148679	0.00986551	0.843475	0.994492	0.446871	0.832443	0.749927
YBR286W	APE3	4	-1.14584	0.183597	0.0115755	0.963441	0.859075	0.405745	1.42437	0.836533	0.303379
YBR291C	CTP1	4	-2.90107	0.256076	0.00457795	-0.465638	0.557339	0.51825	0.587469	0.536015	0.492534
YBR292C	YBR292C	4	-0.368702	0.336299	0.197429	0.240138	0.499297	0.717434	0.39554	0.481242	0.615876
YBR293W	VBA2	4	0.483188	0.554127	0.271102	0.304751	0.425613	0.584431	0.152642	0.58879	0.874847
YBR295W	PCA1	4	0.059887	0.317176	0.790735	0.032812	0.901961	0.983518	0.0258384	1.00579	0.98876
YBR296C	PHO89	4	0.307161	0.144113	0.0687751	-0.000344095	0.813958	0.999748	-0.0982369	0.834911	0.945542
YBR298C	MAL31	4	-0.530156	0.472789	0.191684	0.195683	0.562074	0.796011	0.408337	0.63507	0.700094
YCR024C-A	PMP1	4	0.182449	0.783275	0.741443	0.784791	1.04214	0.563511	0.757314	1.10298	0.674932
YCR026C	NPP1	3	2.13473	1.0474	0.142381	0.123202	0.708743	0.919362	-0.63488	1.09609	0.77624
YCR036W	RBK1	1	1.70333	NA	NA	0.106569	NA	NA	-0.495275	NA	NA
YCR043C	YCR043C	2	0.153346	0.0865933	0.341961	0.0420525	1.36539	0.991566	0.00141107	1.4405	0.999359
YCR045C	RRT12	3	1.04541	0.207369	0.0472075	0.0650451	0.317221	0.902103	-0.299037	0.401814	0.723682
YCR051W	YCR051W	4	-0.248389	0.240435	0.214531	-0.490549	1.23222	0.768339	-0.402223	1.21863	0.840454
YCR059C	YIH1	4	0.126491	0.314865	0.570943	-0.264642	0.773718	0.800662	-0.305326	0.69892	0.788162
YCR061W	YCR061W	4	1.202	0.227686	0.0154315	1.40738	0.550629	0.149381	1.0293	0.546564	0.267433
YCR066W	RAD18	4	-3.73928	0.441354	0.00713621	0.0305372	0.718533	0.980503	1.40411	0.592774	0.187662
YCR076C	FUB1	4	-0.095331	0.518311	0.795372	0.477363	0.354277	0.337691	0.541005	0.254339	0.226328
YCR079W	PTC6	4	-2.93184	0.2479	0.0043033	-1.01544	1.04029	0.454077	0.0312786	1.09059	0.986516
YCR082W	AHC2	4	0.406546	0.363168	0.191997	0.613915	1.00128	0.644811	0.499539	1.08585	0.777867
YCR087C-A	YCR087C-A	4	-0.13142	0.17038	0.317317	0.40806	0.534615	0.557719	0.482601	0.516905	0.560357
YCR087W	YCR087W	4	-1.6855	0.311951	0.0148902	-0.353788	0.217153	0.272978	0.261155	0.182614	0.368887
YCR090C	YCR090C	4	0.557547	0.137598	0.023397	0.679404	0.467443	0.310333	0.512248	0.463945	0.491741
YCR091W	KIN82	4	0.733514	0.381471	0.0809408	0.463108	0.665344	0.597021	0.225092	0.574039	0.810792
YCR092C	MSH3	4	0.61975	0.170214	0.0276198	-0.520611	0.758321	0.601971	-0.748728	0.760101	0.539171
YCR099C	YCR099C	4	-0.343786	0.592521	0.430443	-0.51735	1.26918	0.763583	-0.395213	1.15899	0.832909
YCR100C	YCR100C	4	0.0379732	0.388927	0.891398	0.000801142	0.97384	0.999748	0.000767859	1.14558	0.999359
YCR101C	YCR101C	4	1.41492	0.144281	0.00569113	0.21177	0.926459	0.869668	-0.281901	0.985142	0.862276
YCR102C	YCR102C	4	-1.04976	0.169668	0.0116247	-0.632035	0.845147	0.567175	-0.257012	0.832344	0.854065
YCR105W	ADH7	4	-0.673165	0.108561	0.0115837	-1.05832	0.732744	0.31418	-0.833779	0.788503	0.513484
YCR106W	RDS1	4	-0.591274	0.304239	0.0796313	-0.900484	0.933987	0.459037	-0.700656	1.00712	0.669415
YDL130W-A	STF1	4	-0.654266	0.215308	0.0380665	-1.5414	0.669585	0.172041	-1.33917	0.625001	0.225349
YDR363W-A	SEM1	4	1.71251	0.644371	0.0475597	-0.011929	0.271992	0.980503	-0.620896	0.453159	0.385018
YDR525W-A	SNA2	4	-0.455117	0.824667	0.450304	0.000470174	1.1397	0.999748	0.179615	1.25783	0.930767
YDR536W	STL1	4	0.0765751	0.580953	0.854196	-0.263339	1.05496	0.856096	-0.285843	1.14542	0.876952
YDR538W	PAD1	4	-0.686622	0.316287	0.0668228	-0.405683	0.354091	0.396386	-0.155391	0.445672	0.827561
YDR539W	FDC1	4	-0.756761	0.381387	0.0769198	-0.741103	0.577248	0.358115	-0.476043	0.553411	0.598529
YDR540C	IRC4	4	-0.569043	0.221474	0.0498391	-0.292359	0.901889	0.810652	-0.0811734	0.977454	0.959423
YDR541C	YDR541C	4	1.16692	0.244966	0.0177142	0.129009	0.806443	0.907751	-0.277185	0.818783	0.833749
YER039C-A	YER039C-A	4	0.192329	0.50998	0.594606	-0.00281974	1.06975	0.999608	-0.0590615	0.975934	0.969426
YER091C-A	YER091C-A	4	0.433073	0.42052	0.215419	-0.535224	0.222193	0.162227	-0.69597	0.174186	0.0736491
YER101C	AST2	4	1.56117	0.334364	0.0182878	0.526555	0.919389	0.661721	-0.0102039	0.951759	0.995553
YER103W	SSA4	4	1.03515	0.496533	0.0715768	0.581476	0.373926	0.290037	0.23763	0.320725	0.647657
YER106W	MAM1	4	-0.146155	0.303053	0.502324	-0.283389	1.44671	0.884839	-0.225594	1.59985	0.932298
YER110C	KAP123	4	0.827187	0.568885	0.127905	0.478926	0.337297	0.319367	0.207375	0.201759	0.521292
YER113C	TMN3	4	-0.676635	0.34235	0.0773428	-0.66631	0.61579	0.418066	-0.427977	0.655668	0.697188
YER114C	BOI2	4	-0.185525	0.0384422	0.017517	-0.440232	0.90176	0.711212	-0.373143	0.925908	0.805985
YER115C	SPR6	4	0.26157	0.492693	0.465248	-0.26337	0.53477	0.709992	-0.353102	0.382192	0.56505
YER118C	SHO1	4	0.348893	0.473177	0.336851	1.52521	0.825852	0.23264	1.46091	0.781679	0.270158
YER119C	AVT6	4	-0.285315	0.0907935	0.0359095	-0.483469	0.549025	0.493713	-0.381498	0.543601	0.66557
YER119C-A	YER119C-A	4	-1.68664	0.349262	0.0175167	-0.654643	1.08891	0.652287	-0.0489028	1.04435	0.975242
YER121W	YER121W	4	0.792916	0.141545	0.0141256	-0.513697	1.26882	0.764386	-0.804521	1.32213	0.717957
YER122C	GLO3	4	-1.097	0.312724	0.029767	1.85805	0.650302	0.124321	2.32983	0.656121	0.0900981
YER124C	DSE1	4	-0.356969	0.129543	0.0449418	-0.873804	0.954841	0.478374	-0.75827	1.00895	0.644769
YER128W	VFA1	4	-0.0112159	0.356363	0.966342	-0.291964	0.580417	0.707424	-0.28348	0.473852	0.720986
YER129W	SAK1	4	-0.719761	0.469742	0.116933	-0.278496	0.591254	0.722835	-0.0120963	0.621508	0.992377
YER130C	COM2	4	0.370903	0.258528	0.13107	-0.814272	0.62374	0.352198	-0.961344	0.593374	0.318745
YER131W	RPS26B	4	-1.16279	0.0768052	0.00301399	-0.893325	0.975191	0.478374	-0.485581	0.992095	0.768225
YER132C	PMD1	4	-1.04342	0.204971	0.0162144	-0.881647	0.89087	0.449219	-0.516906	0.985714	0.754192
YER134C	YER134C	4	1.35564	0.268376	0.0163735	0.584801	0.319051	0.234825	0.124594	0.250705	0.766205
YER135C	YER135C	4	0.0374149	0.457513	0.91008	0.3734	0.366009	0.440247	0.385478	0.447569	0.598529
YER137C	YER137C	4	0.40804	0.637834	0.390772	0.441815	0.802109	0.676338	0.321395	0.643647	0.766205
YER140W	EMP65	4	0.862703	0.32063	0.0465942	0.20931	0.400016	0.694415	-0.0837652	0.315826	0.873161
YER141W	COX15	4	-1.24545	0.506668	0.0539956	6.56096	0.606991	0.0137736	7.237	0.648848	0.0108153
YER142C	MAG1	4	-0.417903	0.695254	0.416972	-0.985917	0.200838	0.051419	-0.851823	0.457453	0.271106
YER143W	DDI1	4	-0.804056	0.243931	0.0332706	-0.127312	0.8205	0.912467	0.174553	0.769297	0.891142
YER144C	UBP5	4	0.276339	0.258237	0.204667	0.453986	0.770535	0.657372	0.381816	0.74429	0.76096
YER145C	FTR1	4	0.459701	0.517751	0.264597	-0.0430089	1.27028	0.983876	-0.197698	1.17438	0.915686
YER150W	SPI1	4	0.376511	0.329589	0.186812	0.835479	1.26243	0.616293	0.739099	1.24995	0.723048
YER151C	UBP3	3	3.03929	0.40516	0.0294533	3.52996	0.513164	0.0986942	2.55205	0.676325	0.220232
YER152C	YER152C	4	0.212926	0.565133	0.594882	-0.108557	0.789612	0.92277	-0.175663	0.748104	0.887056
YER153C	PET122	4	-4.90031	0.334973	0.0031982	5.53402	0.351082	0.00894569	7.50541	0.38892	0.00615666
YER155C	BEM2	4	2.72676	0.56861	0.0177142	7.70809	0.119368	0.00210169	6.9773	0.269024	0.00357463
YER156C	YER156C	4	-3.19927	0.360689	0.00656619	-1.84957	0.971792	0.225075	-0.732331	0.943696	0.636581
YER158C	YER158C	4	0.62016	0.403559	0.116575	-0.120086	0.643919	0.893412	-0.33555	0.786886	0.790987
YER161C	SPT2	4	-1.32323	0.188409	0.00974915	-1.1887	0.583269	0.20727	-0.732095	0.59696	0.441284
YER163C	GCG1	4	1.58597	0.724551	0.0659833	0.0674298	0.465618	0.919335	-0.493016	0.694665	0.663823
YER164W	CHD1	4	1.65956	0.392517	0.0215612	0.59954	0.886411	0.609236	0.0293605	0.933689	0.985404
YER167W	BCK2	4	0.519874	0.293886	0.0933721	-0.596833	0.723877	0.524785	-0.791091	0.678909	0.46703
YER169W	RPH1	4	-0.102175	0.294646	0.622278	-0.121565	0.988222	0.933442	-0.0745799	1.06233	0.964588
YER170W	ADK2	4	0.465653	0.483619	0.237468	-0.317803	0.836462	0.777733	-0.483438	0.742712	0.69805
YER173W	RAD24	4	-1.01383	0.178528	0.0137077	-0.723418	0.785758	0.477377	-0.364375	0.789235	0.777068
YER174C	GRX4	4	-0.0853849	0.163418	0.471246	-0.317973	0.486086	0.619223	-0.283367	0.46542	0.717957
YER175C	TMT1	4	-0.0382037	0.131171	0.677638	-0.10497	0.436505	0.86008	-0.0807015	0.464788	0.911371
YER176W	ECM32	4	1.13698	0.578306	0.0779603	0.178794	0.902848	0.884615	-0.214928	1.03413	0.896893
YER177W	BMH1	4	-1.2827	0.805028	0.110168	0.611518	1.10189	0.673284	1.11094	0.934429	0.455615
YER180C	ISC10	4	0.321503	1.02214	0.654019	0.566508	0.5341	0.426012	0.481522	0.663655	0.654089
YER181C	YER181C	4	-1.18539	0.22714	0.0156578	-0.906775	0.369376	0.156482	-0.491247	0.335406	0.358884
YER182W	FMP10	4	1.07394	0.265622	0.0234522	0.13101	0.479614	0.840106	-0.241331	0.4305	0.733408
YER183C	FAU1	4	0.311527	0.390826	0.303911	0.622211	0.251382	0.15439	0.542631	0.37048	0.358884
YER184C	TOG1	4	0.836045	1.13667	0.33724	0.491174	0.803615	0.64556	0.216795	0.836362	0.874847
YER185W	PUG1	4	-0.30224	0.357542	0.281607	-0.664983	1.27064	0.694415	-0.562663	1.21594	0.776997
YFL034C-A	RPL22B	4	0.760052	0.285078	0.0472626	-0.365813	0.603101	0.648143	-0.639968	0.709072	0.576399
YFR032C	RRT5	4	0.292106	0.251719	0.182433	-0.20808	0.907177	0.869543	-0.307142	0.854606	0.824011
YFR032C-A	RPL29	1	2.05993	NA	NA	0.372395	NA	NA	-0.350539	NA	NA
YFR033C	QCR6	4	4.75082	0.266576	0.00235724	2.12692	1.1735	0.239182	0.482196	1.22311	0.810792
YFR034C	PHO4	4	1.36662	0.255518	0.0150674	0.970963	0.185133	0.0457636	0.51911	0.180686	0.131874
YFR035C	YFR035C	4	1.41315	0.139472	0.00538428	1.22952	0.806554	0.296259	0.769017	0.823521	0.560357
YFR036W	CDC26	4	0.61962	0.45695	0.144141	1.6313	0.634676	0.148284	1.47201	0.702943	0.231699
YFR038W	IRC5	4	0.199236	0.565659	0.617085	-0.0390549	0.493164	0.959543	-0.098965	0.672025	0.927492
YFR040W	SAP155	4	-0.702722	0.373817	0.0841279	1.60252	0.664387	0.162	1.92285	0.699121	0.143771
YFR041C	ERJ5	4	0.809488	0.298203	0.0457798	0.140209	0.939478	0.915706	-0.135736	1.03258	0.937442
YFR043C	IRC6	4	1.38506	0.351994	0.0247162	-0.371822	0.447203	0.520329	-0.873294	0.410192	0.226328
YFR044C	DUG1	4	1.46947	0.196047	0.00887295	0.821944	1.56901	0.694415	0.327951	1.58093	0.897019
YFR045W	YFR045W	4	1.2234	0.404165	0.0382076	0.0772344	0.368835	0.880097	-0.351139	0.420852	0.608984
YFR046C	CNN1	4	0.301212	0.574181	0.469438	0.247014	0.390098	0.633549	0.159189	0.364611	0.788162
YFR048W	RMD8	4	-1.49359	0.29538	0.0163735	-0.13843	0.37917	0.786339	0.413657	0.476086	0.594427
YFR049W	YMR31	4	1.02064	0.346382	0.0398634	-0.0565635	0.468702	0.934721	-0.415531	0.375872	0.491116
YFR053C	HXK1	4	0.736903	0.228916	0.0345312	0.23644	0.756512	0.818488	-0.0100529	0.703118	0.994843
YFR054C	YFR054C	4	0.751885	0.145439	0.0159598	-0.0149531	0.391756	0.982298	-0.274925	0.439332	0.708112
YFR055W	IRC7	4	-0.965413	0.595358	0.107684	-0.809893	1.11488	0.577251	-0.471208	0.935633	0.766205
YFR056C	YFR056C	4	-0.53611	0.366169	0.126628	-0.357123	0.4276	0.51825	-0.159975	0.380429	0.7951
YFR057W	YFR057W	4	-0.218789	0.423059	0.474791	-0.225754	0.731687	0.819533	-0.139721	0.851104	0.916936
YGR221C	TOS2	4	0.22349	0.182331	0.168172	0.465692	0.733269	0.631797	0.413101	0.758087	0.742736
YGR222W	PET54	4	-0.294663	0.42339	0.358789	6.60572	0.304309	0.00636081	6.93767	0.161649	0.00214297
YGR223C	HSV2	4	-0.535892	0.447057	0.173903	0.0617101	0.423335	0.918783	0.272166	0.54176	0.766205
YGR224W	AZR1	4	-0.341842	0.54468	0.398696	-0.0460364	1.06694	0.980503	0.0904579	1.05932	0.959027
YGR225W	AMA1	4	-0.369341	0.129679	0.0422044	0.297889	0.420072	0.589056	0.45537	0.433147	0.513531
YGR226C	YGR226C	4	0.0830735	0.494798	0.814041	0.408975	0.992535	0.760454	0.405599	0.858071	0.771662
YGR227W	DIE2	4	-0.417589	0.146277	0.0420449	-0.67808	0.587865	0.39387	-0.534261	0.564543	0.555611
YGR232W	NAS6	4	-0.308962	0.0941146	0.0334377	-0.30525	1.30186	0.865387	-0.188989	1.35287	0.933685
YGR233C	PHO81	4	-0.258672	0.236631	0.198271	-0.68252	1.18222	0.660655	-0.596593	1.28583	0.7763
YGR234W	YHB1	4	0.53695	0.795233	0.370648	0.453029	0.439511	0.434571	0.286122	0.535632	0.750912
YGR236C	SPG1	4	-0.0406653	0.364053	0.875762	-0.00452571	0.784503	0.997073	0.0238479	0.863256	0.987401
YGR237C	YGR237C	4	0.0325253	0.417373	0.914735	-0.0933068	0.483559	0.888104	-0.0943683	0.457404	0.898112
YGR241C	YAP1802	4	0.38153	0.42296	0.258647	0.0282382	0.939988	0.986585	-0.0957664	0.855753	0.948707
YGR242W	YGR242W	4	-0.20757	0.469358	0.536571	-0.342404	0.939389	0.787012	-0.264177	1.11514	0.885639
YGR243W	MPC3	4	0.616072	0.222345	0.0445163	0.194689	0.820266	0.861598	-0.00922754	0.867987	0.995553
YGR244C	LSC2	4	-0.411191	0.332183	0.165958	-0.355375	0.0858614	0.069687	-0.203567	0.170229	0.453868
YGR247W	CPD1	4	-0.154455	0.603298	0.715781	-0.18418	1.11477	0.904934	-0.120197	0.948547	0.940163
YGR249W	MGA1	4	-0.791008	0.270948	0.0404157	-0.176853	1.60976	0.940198	0.118687	1.71574	0.964702
YGR256W	GND2	4	0.407268	0.461029	0.266057	-0.748644	1.16933	0.629793	-0.906833	1.13938	0.625538
YGR260W	TNA1	4	-0.415705	0.332877	0.163826	-0.760638	1.14134	0.615193	-0.620142	1.24817	0.766205
YGR263C	SAY1	4	0.817007	0.271924	0.038508	0.389652	1.19456	0.809256	0.118946	1.27973	0.956269
YGR266W	YGR266W	4	0.354221	0.315934	0.191684	-0.713281	0.356839	0.213671	-0.851062	0.428847	0.24996
YGR268C	HUA1	4	-0.710645	0.153967	0.0186998	-1.06665	0.358454	0.118703	-0.82875	0.359377	0.198999
YGR275W	RTT102	4	-0.135919	0.156454	0.2724	-0.334824	0.915488	0.78631	-0.282392	0.895843	0.849465
YGR279C	SCW4	4	-1.31805	0.146905	0.00646599	-1.37498	0.219561	0.0321241	-0.926209	0.262465	0.0911807
YGR281W	YOR1	4	1.19034	0.429344	0.0444811	-0.633241	0.320631	0.215067	-1.07231	0.270454	0.0746848
YGR282C	BGL2	4	-0.0104671	0.413405	0.971659	-0.0419595	0.867262	0.978775	-0.0257564	0.876871	0.986268
YGR283C	YGR283C	4	-0.192521	0.635673	0.665558	-0.384642	0.863706	0.74098	-0.313233	0.698057	0.781207
YGR284C	ERV29	4	-1.42069	0.275462	0.0160238	-1.73889	0.355297	0.0515206	-1.26445	0.440757	0.131874
YGR288W	MAL13	4	1.23807	0.204927	0.0122677	0.949604	1.04437	0.480822	0.543782	1.03018	0.753702
YGR290W	YGR290W	4	1.03825	0.35772	0.0407944	0.0863536	0.566588	0.913649	-0.274445	0.653441	0.7951
YHR021W-A	ECM12	4	0.500689	0.239492	0.0713194	-0.076041	0.476426	0.907811	-0.246681	0.552397	0.781492
YHR079C-B	YHR079C-B	4	-1.08973	0.083311	0.00362363	-0.278717	1.70495	0.90597	0.122123	1.78461	0.964702
YIL009C-A	EST3	4	-0.764918	0.288356	0.0476885	-0.0711283	0.272589	0.848352	0.21831	0.199567	0.492994
YIR017C	MET28	4	0.372229	0.224347	0.104048	-0.0734442	0.245404	0.82436	-0.197319	0.262977	0.644769
YIR018W	YAP5	4	-0.0422456	0.644494	0.929257	-0.122964	0.960236	0.929042	-0.0978013	0.768374	0.940113
YIR019C	FLO11	4	-0.109575	0.193159	0.439497	-0.0249048	0.238163	0.942294	0.0278591	0.184074	0.923008
YIR020C	YIR020C	4	-0.62849	0.493671	0.159058	-0.774769	0.988454	0.54875	-0.557399	0.87946	0.705883
YIR021W	MRS1	4	-3.4305	0.382736	0.00646599	6.75605	0.626003	0.0137736	8.23238	0.697284	0.0104248
YIR024C	INA22	4	0.146681	0.363327	0.568911	0.24159	0.993146	0.858455	0.209749	0.950526	0.893742
YIR027C	DAL1	4	1.40158	0.213764	0.0108574	0.598589	0.343528	0.250829	0.122129	0.421655	0.861394
YIR028W	DAL4	4	0.277756	0.770273	0.609266	0.389185	0.55989	0.597552	0.314428	0.495711	0.705883
YIR029W	DAL2	4	0.637899	0.128217	0.0166883	-0.448298	1.81845	0.857215	-0.680698	1.83586	0.820667
YIR031C	DAL7	4	-0.201387	0.382263	0.468355	-0.0365163	0.579888	0.97176	0.0492412	0.680386	0.964277
YIR033W	MGA2	4	-0.609965	0.521322	0.180038	-0.151207	0.858091	0.89906	0.0793621	0.70988	0.948707
YIR035C	YIR035C	4	1.74055	0.194976	0.0064926	-0.565903	0.640585	0.49316	-1.20277	0.591084	0.239021
YIR036C	IRC24	4	-0.509416	0.278414	0.0884839	-0.474343	1.32964	0.792787	-0.290642	1.3145	0.893617
YIR037W	HYR1	4	0.705407	0.45361	0.114107	0.495798	0.953211	0.697167	0.26904	0.897584	0.856657
YIR038C	GTT1	4	1.27472	1.03135	0.166439	-0.144516	0.361104	0.767614	-0.598626	0.746216	0.623375
YIR039C	YPS6	4	-0.317338	0.274699	0.183655	0.202775	1.32134	0.913023	0.338317	1.31149	0.875708
YIR042C	YIR042C	4	0.820274	0.162997	0.0164626	1.39289	0.947377	0.308212	1.15306	0.925115	0.432642
YKL033W-A	YKL033W-A	4	0.50039	0.29315	0.099178	-0.241255	1.37335	0.899351	-0.417067	1.42792	0.860995
YKL162C-A	YKL162C-A	4	1.40594	0.305976	0.0188243	0.266784	1.18061	0.871201	-0.221866	1.17095	0.902575
YKR035W-A	DID2	4	-2.57832	0.948823	0.0457267	-1.07607	1.42289	0.562083	-0.159765	1.18381	0.936161
YKR066C	CCP1	4	-0.997431	0.586481	0.0998532	-0.19902	0.733197	0.840818	0.170826	0.64977	0.874847
YKR067W	GPT2	4	0.0538184	0.73933	0.920865	0.234471	0.383636	0.64556	0.236148	0.427696	0.736813
YKR069W	MET1	4	-0.667413	0.266633	0.0521511	-0.0795233	0.387283	0.880897	0.174213	0.39	0.781492
YKR070W	YKR070W	4	0.0426648	0.352269	0.865017	-0.962786	0.786731	0.37236	-0.995323	0.863108	0.472645
YKR072C	SIS2	4	-0.823014	0.65006	0.160185	-1.06222	0.564639	0.227306	-0.783345	0.44749	0.294853
YKR074W	AIM29	4	-4.15091	0.321354	0.00370381	0.48362	0.997836	0.715012	2.02126	0.983322	0.234861
YKR075C	YKR075C	4	0.0411551	0.249975	0.8179	-0.363376	1.22047	0.82502	-0.376205	1.33546	0.864358
YKR076W	ECM4	4	-0.858355	0.338157	0.0510765	-0.925377	0.867102	0.42283	-0.629288	0.899108	0.666124
YKR077W	MSA2	4	-0.149606	0.203445	0.33724	-0.557475	1.00169	0.673284	-0.507186	1.08843	0.776113
YKR080W	MTD1	4	0.643801	0.234559	0.0450988	0.728662	0.389079	0.227306	0.531735	0.402331	0.402971
YKR089C	TGL4	4	-0.0488369	0.381808	0.85898	0.186277	0.207554	0.485763	0.223719	0.311489	0.659941
YKR090W	PXL1	4	0.54307	0.1718	0.0354965	-0.483498	0.955924	0.705295	-0.682562	1.02184	0.683625
YKR091W	SRL3	4	-0.259599	1.10036	0.738182	-0.443614	0.559282	0.543725	-0.349714	0.485091	0.658267
YKR092C	SRP40	2	-0.407781	0.747208	0.660529	-0.276975	0.331372	0.744727	-0.1239	0.070428	0.65489
YKR093W	PTR2	4	-0.130476	0.109817	0.175947	-0.64849	0.294004	0.184199	-0.608061	0.339068	0.287273
YKR097W	PCK1	4	-0.192447	0.460538	0.555645	0.117503	0.376612	0.818489	0.204934	0.449405	0.778047
YKR098C	UBP11	4	-0.677988	0.0917047	0.00908562	-0.336877	1.17693	0.832191	-0.0875233	1.20041	0.964277
YKR101W	SIR1	4	-4.40345	0.405502	0.00486506	-0.925961	0.3891	0.165119	0.658395	0.476725	0.382992
YKR104W	YKR104W	4	0.379047	0.517176	0.338633	-0.152597	1.24225	0.933475	-0.28148	1.20836	0.888845
YKR105C	VBA5	4	-0.450626	0.192252	0.058673	-0.0738394	0.653462	0.939157	0.101298	0.610248	0.916428
YLL018C-A	COX19	4	-1.55319	0.366685	0.0215612	6.26109	0.867003	0.0238219	7.03938	0.812621	0.0157204
YLR262C-A	TMA7	4	-0.742507	0.304639	0.0548784	0.157934	0.693725	0.870547	0.446549	0.776708	0.728024
YLR422W	YLR422W	4	-5.7004	0.21313	0.00154997	-1.30808	0.339085	0.0782375	0.735375	0.333062	0.214254
YLR427W	MAG2	4	0.341627	0.150108	0.0617905	-0.282684	0.992307	0.832372	-0.402126	0.994981	0.80566
YLR428C	YLR428C	4	0.283726	0.236214	0.173524	-0.437499	0.73534	0.654845	-0.540847	0.683804	0.628209
YLR429W	CRN1	4	0.20967	0.474867	0.536913	0.16302	1.16505	0.921222	0.105777	1.0921	0.954383
YLR431C	ATG23	4	0.655051	0.283963	0.0603454	0.201593	0.928584	0.873229	-0.0162683	0.883484	0.992773
YLR432W	IMD3	4	0.996229	0.20071	0.0167729	-0.0467609	1.00408	0.979445	-0.396544	1.06934	0.820667
YLR433C	CNA1	4	-0.734731	0.514711	0.132024	-1.54403	0.865834	0.243636	-1.31264	0.738109	0.289631
YLR434C	YLR434C	4	-1.98915	0.29623	0.0104185	-0.834352	0.50566	0.268916	-0.124422	0.613796	0.899621
YLR438W	CAR2	4	0.589318	0.239484	0.0538781	-0.777092	1.02161	0.559093	-1.00235	1.09309	0.56772
YLR441C	RPS1A	1	-3.77683	NA	NA	0.182971	NA	NA	1.57506	NA	NA
YLR443W	ECM7	4	1.34284	0.667943	0.0755856	1.32948	1.24923	0.424357	0.897732	1.04674	0.59861
YLR444C	YLR444C	4	0.0856259	0.417293	0.771289	-0.140765	1.18887	0.93603	-0.16264	1.20539	0.936161
YLR445W	GMC2	4	-0.719364	0.243372	0.0395909	0.170455	1.11798	0.913649	0.451061	1.07081	0.7951
YLR449W	FPR4	4	-1.30642	0.36532	0.0286694	-0.00217579	1.485	0.999748	0.486247	1.4402	0.833749
YLR450W	HMG2	4	0.602796	0.294036	0.0734534	0.0598586	1.27796	0.979419	-0.143543	1.25686	0.948313
YLR452C	SST2	4	-1.88608	0.705925	0.0471723	2.48688	0.671597	0.0820936	3.26551	0.906546	0.0882037
YLR454W	FMP27	4	0.776681	0.292109	0.0475394	-0.228336	0.80716	0.833125	-0.50414	0.821459	0.715455
YML009C	MRPL39	4	1.63401	0.657068	0.0526767	0.366933	0.782325	0.724418	-0.201397	0.830066	0.881469
YML021C	UNG1	4	0.897834	0.435989	0.0729207	0.295997	0.838051	0.79436	-0.00707475	0.752683	0.995553
YML081C-A	ATP18	4	3.2077	0.108732	0.00154997	3.04651	0.307248	0.0155612	1.99195	0.298742	0.025328
YMR052C-A	YMR052C-A	4	-1.00586	0.549674	0.0884839	-0.783296	0.521798	0.302138	-0.429062	0.662965	0.698497
YMR052W	FAR3	4	-0.243599	0.488124	0.488627	-0.589212	1.17316	0.708009	-0.50578	1.36104	0.820667
YMR053C	STB2	4	0.324404	0.681271	0.507955	0.221581	0.497069	0.74098	0.124516	0.317427	0.810792
YMR055C	BUB2	4	-0.779396	0.552418	0.134786	-0.104025	0.396532	0.847551	0.189623	0.270653	0.666124
YMR056C	AAC1	4	1.08175	0.219439	0.0170213	0.0809704	1.39649	0.973395	-0.295809	1.39724	0.896056
YMR057C	YMR057C	4	-0.338284	0.582193	0.430057	-0.331057	1.37963	0.860395	-0.204966	1.25995	0.917153
YMR063W	RIM9	4	-0.60428	0.393778	0.116681	1.04706	1.07203	0.45403	1.31386	1.09554	0.453245
YMR064W	AEP1	4	-4.00498	0.657771	0.0120738	5.52241	0.878392	0.0321241	7.16806	0.84311	0.016298
YMR065W	KAR5	4	-0.0538453	0.524997	0.885756	-0.531649	0.921826	0.660655	-0.515334	1.02295	0.766205
YMR067C	UBX4	4	2.5393	0.304732	0.00732017	0.762258	0.199287	0.0787882	-0.122418	0.219996	0.735723
YMR068W	AVO2	4	-0.111276	0.296675	0.596146	-0.176531	1.21488	0.919286	-0.127995	1.32412	0.954383
YMR072W	ABF2	4	0.0384946	0.23462	0.818372	1.99564	0.456279	0.0652512	2.05918	0.543624	0.0795891
YMR073C	IRC21	4	0.421225	1.10973	0.592273	0.553429	0.440955	0.365008	0.431786	0.608887	0.663823
YMR075C-A	YMR075C-A	4	0.599736	0.140759	0.0214194	1.01641	0.788306	0.358115	0.844689	0.834771	0.528652
YMR075W	RCO1	4	-1.66694	0.0812296	0.00210763	-0.498486	0.50226	0.448063	0.105088	0.498866	0.896056
YMR083W	ADH3	4	0.22989	0.0785487	0.0402086	-0.793136	0.789152	0.443607	-0.888288	0.811276	0.492994
YMR085W	YMR085W	4	0.935337	0.941002	0.226975	0.412215	0.288853	0.31892	0.0992298	0.325237	0.854187
YMR086C-A	YMR086C-A	4	0.67734	1.28648	0.46841	0.678609	0.529327	0.358115	0.467894	0.206687	0.205578
YMR086W	SEG1	4	-0.0907495	0.654491	0.847394	-0.130644	0.562711	0.86701	-0.0881008	0.538049	0.916938
YMR087W	YMR087W	4	-0.225424	0.192082	0.179224	0.160882	0.324811	0.709992	0.261684	0.295899	0.586437
YMR088C	VBA1	4	0.374314	0.501681	0.331616	0.0643924	0.380482	0.902645	-0.0558346	0.265176	0.896056
YMR090W	YMR090W	4	0.791576	0.627577	0.161117	-0.235805	0.691015	0.800693	-0.51726	0.861964	0.72079
YMR158C-B	YMR158C-B	4	-0.208158	0.206508	0.222478	0.669653	0.545346	0.37136	0.780442	0.548015	0.369253
YMR169C	ALD3	4	0.0238231	0.206719	0.872045	0.167862	0.661736	0.85428	0.17831	0.693799	0.876219
YMR174C	PAI3	4	1.2831	0.366003	0.0297852	0.323917	1.09213	0.825556	-0.118267	1.13344	0.952516
YMR175W	SIP18	4	0.199423	0.13259	0.12065	-0.295572	0.961356	0.819533	-0.363749	0.969648	0.820349
YNR032C-A	HUB1	4	0.239018	0.431512	0.448904	-0.423516	0.966581	0.744121	-0.510171	0.975086	0.75432
YNR051C	BRE5	4	1.71213	0.404915	0.0215612	1.98121	0.531828	0.0812937	1.43609	0.421349	0.0978713
YNR056C	BIO5	4	1.24078	0.198909	0.0115755	0.608805	0.260767	0.170635	0.191106	0.21267	0.577561
YNR057C	BIO4	4	0.366634	0.886817	0.559611	0.241705	0.515265	0.724418	0.129936	0.68792	0.902999
YNR058W	BIO3	4	-0.297223	0.168015	0.0933721	0.185648	0.847211	0.873048	0.313333	0.816355	0.813466
YNR061C	YNR061C	4	-0.119793	0.666217	0.800219	-0.0997156	0.724386	0.92277	-0.0456293	0.527374	0.959027
YNR063W	YNR063W	4	-0.746723	0.177408	0.0216563	-1.20125	0.82095	0.309729	-0.954549	0.783669	0.444886
YNR064C	YNR064C	4	0.0632892	0.331388	0.788387	0.207808	1.03397	0.883487	0.205191	1.14067	0.907017
YNR065C	YNR065C	4	0.833172	0.363048	0.060812	0.351331	0.675846	0.697167	0.0735267	0.667605	0.948707
YNR067C	DSE4	4	-0.590812	0.14911	0.024402	-0.247127	0.744671	0.805465	-0.0265841	0.753133	0.982873
YNR068C	YNR068C	4	-0.0138355	0.130233	0.881611	-0.0126208	0.929708	0.993561	0.00574418	0.956791	0.997431
YNR070W	PDR18	4	-0.121861	0.504519	0.731065	-0.196346	0.323541	0.648143	-0.144597	0.426474	0.833526
YNR071C	YNR071C	4	-0.345477	0.302033	0.186611	-0.666482	1.30891	0.703256	-0.548497	1.38267	0.810248
YNR074C	AIF1	4	1.7604	0.246459	0.00955044	0.181081	1.07722	0.903191	-0.439121	1.09656	0.808042
YNR075W	COS10	4	0.752666	0.368066	0.073789	-0.153924	0.445855	0.798251	-0.418622	0.576611	0.654089
YOL013W-A	YOL013W-A	4	0.926713	0.194747	0.0177142	-0.58716	0.470556	0.368277	-0.928954	0.433528	0.225349
YOL087C	DUF1	4	-0.524222	0.227142	0.0603454	0.127768	0.584206	0.873048	0.336094	0.647605	0.756475
YOL091W	SPO21	4	-0.583147	0.314883	0.0867536	-0.849263	0.574523	0.307177	-0.650752	0.625135	0.516487
YOL092W	YPQ1	4	1.12881	0.378627	0.0389423	-0.327395	0.78801	0.758842	-0.734329	0.909858	0.623214
YOL093W	TRM10	4	-0.788922	0.0778195	0.00538428	-0.667978	0.485067	0.330978	-0.388893	0.520555	0.646695
YOL096C	COQ3	4	-2.09285	1.03161	0.0745893	7.17649	0.933847	0.0218214	8.18015	0.688401	0.0104248
YOL098C	YOL098C	4	-0.3932	0.0823373	0.0177142	-0.240371	1.28574	0.893412	-0.091425	1.34062	0.964702
YOL103W	ITR2	4	-0.618588	0.30948	0.0762238	-0.624114	1.07441	0.659022	-0.405527	1.15096	0.827561
YOL104C	NDJ1	4	-0.132224	0.223457	0.422745	-0.740768	0.573549	0.358106	-0.702654	0.639396	0.492283
YOL105C	WSC3	4	0.930852	0.113126	0.00741155	-0.320276	0.566895	0.667445	-0.655044	0.594064	0.492269
YOL106W	YOL106W	4	-0.206832	0.450804	0.521777	-0.59568	0.592475	0.443607	-0.525816	0.530595	0.537707
YOL109W	ZEO1	4	1.75952	0.851457	0.0723494	1.27544	0.328707	0.0779473	0.690536	0.557657	0.434976
YOL110W	SHR5	4	-1.26001	0.245911	0.0161487	-0.212553	0.909527	0.86546	0.252283	0.947146	0.872338
YOL116W	MSN1	4	-0.339445	0.189224	0.0913045	-0.0555411	0.440026	0.930549	0.0797784	0.466283	0.913545
YOL117W	RRI2	4	-0.781869	0.170537	0.0188754	0.212231	1.55453	0.923805	0.516886	1.59448	0.84452
YOL118C	YOL118C	4	1.28591	0.183825	0.00979693	-0.2274	0.582837	0.771601	-0.688228	0.579929	0.456892
YOL119C	MCH4	4	-0.213065	0.24622	0.273132	-0.423918	0.497982	0.510283	-0.346299	0.482587	0.660145
YOL122C	SMF1	4	-0.258581	0.403874	0.390459	0.494966	1.17488	0.753194	0.618495	1.21034	0.763099
YOL128C	YGK3	4	-0.350078	0.195521	0.091639	-0.809503	0.768402	0.427772	-0.694418	0.729956	0.555611
YOL129W	VPS68	4	-1.14809	0.189125	0.0121523	-0.53492	0.972067	0.676338	-0.121061	0.95388	0.940113
YOL131W	YOL131W	4	1.10289	0.561762	0.0781505	0.232854	0.732438	0.81528	-0.146754	0.69647	0.896056
YAL054C	ACS1	4	0.12506	0.322158	0.583925	0.873434	0.571026	0.295959	0.863921	0.565062	0.344125
YAL058C-A	YAL058C-A	4	-1.19363	0.763802	0.113345	-0.731789	1.1247	0.622508	-0.353665	1.22813	0.861926
YAR050W	FLO1	4	-1.38396	0.489638	0.0427598	-0.815351	1.83746	0.741811	-0.377503	1.97272	0.902266
YBR232C	YBR232C	4	-0.985042	0.633514	0.114107	-2.12408	1.13322	0.227306	-1.84921	1.09352	0.305611
YCL006C	YCL006C	1	-3.39025	NA	NA	0.014798	NA	NA	1.12578	NA	NA
YCL022C	YCL022C	4	0.281691	0.312786	0.259128	-0.709827	0.724078	0.452817	-0.810579	0.730312	0.488577
YCL023C	YCL023C	4	1.1941	1.04685	0.187091	0.308421	0.0899761	0.0923864	-0.0628959	0.300922	0.896769
YCL035C	GRX1	4	0.105549	0.173152	0.410659	-0.316965	0.875897	0.78904	-0.350467	0.903168	0.810792
YCL074W	YCL074W	4	-0.678436	0.212213	0.0349552	-0.678408	0.419336	0.275513	-0.466346	0.451668	0.520368
YCL075W	YCL075W	4	0.286335	0.726843	0.578304	0.170106	0.47081	0.789657	0.0902639	0.671672	0.936161
YCL076W	YCL076W	4	0.217753	0.342673	0.393832	0.0655829	1.56743	0.980503	0.00536466	1.52783	0.999016
YCR095C	OCA4	4	1.68969	0.732587	0.0603454	0.063776	1.11914	0.973395	-0.474827	1.07557	0.785651
YDR071C	PAA1	4	1.86119	0.498653	0.0266804	1.55085	0.652053	0.165119	0.994404	0.616069	0.320555
YDR424C	DYN2	4	-0.574657	0.2712	0.0695253	0.266223	0.613455	0.746217	0.468628	0.63606	0.649213
YDR537C	YDR537C	4	-0.201894	0.875482	0.743704	-0.403337	1.14664	0.79436	-0.339129	1.4036	0.881765
YEL011W	GLC3	4	-0.737461	0.297771	0.0530657	0.113279	0.963628	0.93603	0.364694	0.897547	0.805033
YEL012W	UBC8	4	1.92857	0.341086	0.0138316	0.011912	0.691072	0.992321	-0.605639	0.725265	0.608984
YER027C	GAL83	4	0.0652483	0.524972	0.862201	0.534251	0.563054	0.466987	0.535533	0.424997	0.427503
YER031C	YPT31	4	-0.77058	0.714091	0.202245	1.17685	1.08017	0.417664	1.46613	1.23243	0.455615
YER037W	PHM8	4	0.833587	0.174094	0.0177142	0.533827	0.545244	0.453254	0.28541	0.543348	0.753702
YER046W	SPO73	4	-1.04771	0.436525	0.0563361	-0.824629	0.59347	0.328598	-0.496291	0.73145	0.676949
YER063W	THO1	4	2.0014	0.742038	0.0463625	0.763614	1.49127	0.702602	0.141546	1.53095	0.956423
YER064C	VHR2	4	0.075505	0.548734	0.848745	-0.508653	1.05035	0.715012	-0.537275	1.12348	0.769807
YER078C	ICP55	4	0.690246	0.405919	0.0998532	0.656416	0.173714	0.0795385	0.457704	0.280808	0.315995
YER088C	DOT6	4	0.988765	0.537978	0.0878377	0.323383	0.468108	0.598906	0.0191758	0.507235	0.98072
YER090W	TRP2	4	-0.321458	0.259476	0.165799	-0.323542	0.408812	0.545175	-0.218447	0.408725	0.750912
YER092W	IES5	4	-4.15625	0.318086	0.00362363	-0.456155	0.738733	0.641731	0.891759	0.842539	0.513002
YER093C-A	AIM11	4	1.22486	0.251622	0.0173219	1.60261	1.06051	0.297728	1.25427	1.09153	0.473964
YER097W	YER097W	4	-0.0640401	0.377398	0.811768	-0.0445385	0.756179	0.973136	-0.0159879	0.789567	0.991957
YER098W	UBP9	4	-0.359617	0.305863	0.178745	0.483752	0.956897	0.705367	0.621816	0.884777	0.66557
YGL199C	YGL199C	4	0.140532	0.720981	0.783684	0.234283	0.81438	0.831095	0.203458	0.656563	0.85358
YGL214W	YGL214W	4	-2.86532	0.543062	0.0154315	-2.00875	1.22628	0.271169	-1.11991	1.28452	0.594039
YGL217C	YGL217C	4	0.593679	0.636923	0.248638	1.91326	1.0411	0.234479	1.77796	1.16166	0.343741
YGL235W	YGL235W	4	0.5473	0.204467	0.0470672	0.416477	0.462408	0.484407	0.258105	0.519927	0.766205
YGR011W	YGR011W	4	0.828139	0.158206	0.0156102	0.380259	0.489906	0.551593	0.1297	0.508976	0.876812
YGR018C	YGR018C	4	0.805887	0.524708	0.116614	-0.422818	1.04307	0.764386	-0.686606	0.973304	0.664639
YGR022C	YGR022C	4	-0.185798	0.788833	0.738347	-0.0338169	0.554611	0.973048	0.0345749	0.339174	0.954383
YGR053C	YGR053C	4	0.800169	1.94266	0.56073	-0.22823	0.321753	0.589056	-0.485202	0.80925	0.72079
YGR134W	CAF130	4	-0.609007	0.723094	0.283098	-0.969362	0.522441	0.230589	-0.787275	0.470158	0.308773
YGR188C	BUB1	1	-1.27372	NA	NA	1.59328	NA	NA	2.05667	NA	NA
YGR201C	YGR201C	4	0.0208364	0.450808	0.95028	-0.180302	0.713177	0.854636	-0.182793	0.643887	0.863488
YGR210C	YGR210C	4	0.947853	0.409804	0.0602806	0.178674	0.982902	0.895836	-0.115924	1.05577	0.948707
YGR239C	PEX21	4	0.13369	0.524542	0.716736	-0.75102	0.979979	0.556397	-0.804725	1.15063	0.666234
YGR248W	SOL4	4	0.618538	0.651451	0.241926	-0.0528637	1.12584	0.979419	-0.246343	1.04739	0.886676
YHL002W	HSE1	4	-0.748314	0.575861	0.154371	-0.960757	0.543081	0.246	-0.733181	0.546351	0.396963
YHL024W	RIM4	4	-0.417023	0.566883	0.33724	-0.400664	0.640771	0.638839	-0.266477	0.722188	0.820667
YHL025W	SNF6	3	-2.06038	0.783826	0.103872	0.850557	0.485731	0.376294	1.55067	0.406842	0.217997
YHL039W	EFM1	4	0.439772	0.518187	0.280543	-0.620462	0.894359	0.598086	-0.77031	1.07363	0.660145
YHR009C	TDA3	4	1.83922	0.464983	0.0244904	0.887627	1.33702	0.615493	0.321423	1.35765	0.885639
YHR016C	YSC84	4	0.0275977	0.103753	0.704993	-1.59939	0.842143	0.225075	-1.64023	0.868173	0.266868
YHR017W	YSC83	4	1.44671	0.575511	0.0517865	0.805053	0.552378	0.310121	0.364299	0.53149	0.674932
YHR025W	THR1	1	-13.0026	NA	NA	-0.419629	NA	NA	3.80403	NA	NA
YHR032W	ERC1	4	0.441303	0.0652656	0.0103398	0.997509	0.858862	0.391261	0.888387	0.897107	0.537707
YHR045W	YHR045W	4	0.0425825	0.654152	0.929712	-0.298163	0.839293	0.792787	-0.310724	0.922516	0.833749
YHR131C	YHR131C	4	0.723829	0.452825	0.109645	-0.0627876	1.50074	0.980503	-0.290737	1.52854	0.902441
YHR140W	YHR140W	4	-0.149184	0.181776	0.292889	0.460066	0.848307	0.680046	0.529142	0.900423	0.723048
YHR168W	MTG2	1	-7.60526	NA	NA	0.571199	NA	NA	3.06612	NA	NA
YHR180W	YHR180W	4	-0.193599	0.778206	0.723966	0.00336504	0.491881	0.996259	0.0752392	0.685854	0.948707
YHR181W	SVP26	4	1.7945	0.536446	0.0324343	0.879563	1.03247	0.510283	0.327687	0.936799	0.827561
YHR193C	EGD2	4	-0.792977	0.4295	0.0870792	-0.354234	0.64795	0.67716	-0.0966898	0.600952	0.918172
YJL003W	COX16	4	-2.88615	0.31343	0.00623892	5.8074	0.925419	0.0321241	6.90216	0.954575	0.0209887
YJL007C	YJL007C	4	0.285356	0.450609	0.394849	-0.200637	0.737757	0.840343	-0.289608	0.629177	0.777867
YJL012C	VTC4	4	0.841977	0.482464	0.095596	-0.570942	0.501965	0.401399	-0.850233	0.561921	0.349784
YJL013C	MAD3	4	-0.273215	0.174928	0.113385	0.497725	0.949677	0.694415	0.608067	1.02953	0.723048
YJL015C	YJL015C	1	-4.82468	NA	NA	1.46632	NA	NA	3.08044	NA	NA
YJL016W	YJL016W	4	0.559498	0.45785	0.168592	-0.634583	1.01873	0.639424	-0.823697	0.964831	0.598997
YJL017W	YJL017W	4	0.543624	0.905265	0.417216	-0.674352	0.602517	0.405745	-0.859321	0.62861	0.385247
YJL020C	BBC1	4	1.9269	0.460077	0.0218145	1.07237	0.84769	0.362845	0.482378	0.837618	0.728024
YJL021C	YJL021C	4	0.0692098	0.562797	0.862805	0.0827201	0.580904	0.92038	0.0712107	0.744489	0.954826
YJL027C	YJL027C	4	0.869975	0.122529	0.00958465	0.841556	1.68541	0.709758	0.589154	1.70248	0.82807
YJL028W	YJL028W	4	-0.16288	0.191164	0.27933	0.0834119	0.76765	0.940198	0.147343	0.804315	0.905685
YJL161W	FMP33	4	0.120662	0.102113	0.177137	0.477025	0.536159	0.48964	0.458842	0.537816	0.598997
YJL196C	ELO1	4	-0.168194	0.585996	0.682237	-0.209231	0.494304	0.752321	-0.15103	0.545078	0.864987
YJR001W	AVT1	4	-0.633883	0.490182	0.155236	0.12673	1.20983	0.942294	0.344827	1.24239	0.864987
YJR004C	SAG1	4	-1.44304	0.492119	0.0401073	-0.395986	0.936106	0.752321	0.0717458	0.968883	0.963761
YJR005W	APL1	4	0.43925	0.406347	0.201773	-0.27114	1.44247	0.893412	-0.411918	1.41376	0.861225
YJR009C	TDH2	4	0.314186	0.57526	0.454173	-0.842958	1.04565	0.535166	-0.957662	1.134	0.604836
YJR010C-A	SPC1	4	0.704647	0.219362	0.0345942	-0.707853	0.784934	0.483828	-0.946003	0.816419	0.4696
YJR010W	MET3	4	0.7672	0.13744	0.0142259	0.396607	1.12895	0.79436	0.166268	1.16477	0.930767
YJR011C	YJR011C	4	-1.21046	0.213137	0.0137077	-0.402301	0.707962	0.665193	-0.0103122	0.774535	0.995131
YJR014W	TMA22	4	-0.754415	0.554006	0.143077	-0.169303	0.57651	0.828049	0.0804208	0.597427	0.936161
YJR015W	YJR015W	4	0.209205	0.354318	0.423761	-0.222803	0.733833	0.82138	-0.287591	0.664806	0.789625
YJR019C	TES1	4	0.309101	0.466804	0.378337	-0.0701473	0.379298	0.893412	-0.163509	0.253626	0.699803
YJR020W	YJR020W	4	-0.875306	0.7371	0.176074	-0.487159	1.30068	0.78024	-0.206247	1.22851	0.915686
YJR021C	REC107	4	-0.35762	0.18862	0.0830356	0.0385372	0.824361	0.979419	0.16461	0.864902	0.902441
YJR024C	MDE1	4	0.100245	0.168633	0.421452	-0.418203	0.548126	0.557754	-0.45256	0.601864	0.644769
YJR025C	BNA1	4	0.473724	0.722125	0.38197	-0.681641	0.813386	0.517665	-0.84408	0.743099	0.476614
YJR030C	YJR030C	4	0.107733	0.434072	0.724591	0.248341	0.476688	0.696408	0.228533	0.468613	0.768227
YJR031C	GEA1	4	-0.808469	0.792082	0.218207	-0.331776	1.04501	0.815309	-0.0686257	1.12519	0.968984
YJR033C	RAV1	4	-2.52742	0.347989	0.0093686	0.685068	0.94221	0.577251	1.53274	0.99483	0.341223
YJR034W	PET191	4	-3.01105	0.467971	0.0110918	6.20025	1.30312	0.0540405	7.3456	1.35112	0.0389372
YJR036C	HUL4	4	0.312845	0.27931	0.191979	-0.833728	0.952157	0.495787	-0.947761	0.934788	0.52831
YJR037W	YJR037W	4	0.934345	0.309735	0.038299	-0.342619	0.712993	0.717475	-0.64611	0.704938	0.56772
YJR038C	YJR038C	4	0.205925	0.114168	0.0907736	-0.346964	0.674798	0.701358	-0.413849	0.72175	0.728402
YJR039W	YJR039W	4	0.335651	0.31872	0.209401	-0.47038	0.525542	0.486543	-0.582567	0.570588	0.524439
YJR040W	GEF1	4	-0.50197	0.767911	0.382764	-0.592851	0.272239	0.186306	-0.435955	0.524955	0.610476
YJR043C	POL32	4	-1.43941	0.20318	0.00958465	-0.782034	0.657539	0.381868	-0.325316	0.676596	0.768634
YJR047C	ANB1	4	0.480019	1.28077	0.596172	0.134289	0.616911	0.873229	-0.00940758	0.499846	0.992517
YJR048W	CYC1	4	1.42309	0.377952	0.026344	1.25251	0.499538	0.15317	0.830832	0.521582	0.325712
YJR050W	ISY1	4	0.863202	0.175514	0.0170868	0.386631	0.890089	0.746217	0.12484	0.922677	0.936161
YJR052W	RAD7	4	-0.542035	0.205249	0.0479122	0.030181	1.06867	0.987298	0.21597	1.0913	0.901802
YJR053W	BFA1	4	2.33068	0.580596	0.0237559	1.05139	0.560896	0.227306	0.329645	0.703303	0.7749
YJR054W	KCH1	4	0.205461	0.730654	0.688288	0.926069	0.822402	0.40566	0.891769	0.642055	0.382992
YJR056C	YJR056C	4	-0.0468487	1.00962	0.950234	-0.334308	1.39223	0.860395	-0.318727	1.24568	0.876812
YJR058C	APS2	4	0.162783	0.51392	0.651654	0.495564	0.634025	0.550127	0.464164	0.679262	0.674932
YJR059W	PTK2	4	2.22207	0.526252	0.0215829	1.20942	0.686756	0.247772	0.526997	0.657594	0.623375
YJR061W	YJR061W	4	-0.189348	0.369629	0.47876	-0.296929	0.635687	0.726374	-0.234088	0.640691	0.820889
YJR062C	NTA1	4	0.118637	0.158796	0.331155	0.0893033	1.08814	0.957656	0.0618992	1.08911	0.971187
YJR066W	TOR1	4	-1.79787	0.465475	0.0254083	0.37139	0.915146	0.764302	0.973984	1.02109	0.555611
YJR070C	LIA1	4	0.41175	0.974905	0.552485	0.665154	0.554582	0.379812	0.557168	0.64112	0.594427
YJR074W	MOG1	4	-4.00996	0.292459	0.00341862	-0.472412	0.573282	0.524785	0.827548	0.518442	0.325712
YJR084W	YJR084W	4	0.807041	0.668404	0.172099	0.896238	0.774247	0.392996	0.665682	0.704299	0.555611
YJR087W	YJR087W	4	-4.0988	0.854971	0.0177142	-1.46393	1.06589	0.332178	-0.160365	1.19881	0.936185
YJR091C	JSN1	4	0.168907	0.126869	0.148798	0.706391	0.550842	0.358115	0.678372	0.580636	0.466369
YJR094W-A	RPL43B	4	0.66597	0.55897	0.17505	-0.338821	0.71901	0.722814	-0.555	0.744387	0.647657
YJR095W	SFC1	4	-0.0232268	0.82571	0.969713	0.408386	0.951145	0.749494	0.435213	1.09012	0.808121
YJR096W	YJR096W	4	0.793782	0.191817	0.0223001	0.0199633	0.486956	0.980653	-0.22861	0.495099	0.777068
YJR097W	JJJ3	4	0.610714	0.757603	0.29977	0.302748	0.576685	0.694415	0.120871	0.613375	0.901868
YJR098C	YJR098C	4	-0.439174	0.263958	0.103663	-0.811346	1.47555	0.676338	-0.680424	1.44915	0.774649
YJR099W	YUH1	4	-0.415573	0.432212	0.237922	-0.22491	0.527548	0.751652	-0.0867173	0.443732	0.901868
YJR100C	AIM25	4	-0.80688	0.166678	0.0174409	-0.249292	0.267952	0.473276	0.0154442	0.267189	0.971187
YJR106W	ECM27	4	0.0432795	0.443875	0.891398	-0.457998	0.853998	0.683466	-0.474857	0.925848	0.76096
YJR107W	YJR107W	4	1.11187	0.922817	0.172523	0.342646	0.701282	0.710893	-0.00107528	0.535104	0.999359
YJR116W	TDA4	4	0.888696	0.779599	0.18719	-0.610251	0.301758	0.209843	-0.905725	0.232512	0.0766874
YJR117W	STE24	4	4.62822	0.94645	0.0172735	1.60808	0.37486	0.0672532	0.15389	0.261283	0.723048
YJR120W	YJR120W	4	1.18369	0.627147	0.0837588	1.6335	0.28142	0.037229	1.29933	0.287376	0.0566486
YJR121W	ATP2	4	-4.46705	0.40327	0.00467994	4.24236	0.770932	0.0414001	5.81099	0.74982	0.018198
YJR123W	RPS5	4	2.19102	0.41627	0.0154503	0.00481412	0.465792	0.994745	-0.698208	0.403007	0.29814
YJR124C	YJR124C	4	-0.82013	0.402061	0.0739962	-0.104346	0.345047	0.821646	0.168389	0.427031	0.810792
YJR125C	ENT3	4	-0.586535	0.410368	0.131878	-0.240529	1.2815	0.893412	-0.0471759	1.26088	0.981076
YJR126C	VPS70	4	-0.111799	0.300462	0.598502	0.538252	1.74934	0.819533	0.597171	1.86632	0.845911
YJR133W	XPT1	4	-0.331379	0.394291	0.283815	0.725791	1.53143	0.72105	0.860846	1.45313	0.723048
YJR134C	SGM1	4	0.29933	0.954646	0.65504	-0.211129	1.0409	0.881898	-0.304907	0.917291	0.837973
YJR140C	HIR3	4	0.347214	0.422269	0.292454	0.0295708	0.700672	0.980503	-0.0736362	0.779852	0.955755
YJR142W	YJR142W	4	-0.749442	0.202014	0.0268228	0.290156	0.443245	0.619223	0.54997	0.508315	0.497834
YJR145C	RPS4A	1	-4.54648	NA	NA	-2.61857	NA	NA	-1.19894	NA	NA
YJR150C	DAN1	4	0.650751	0.621045	0.210949	-0.035589	0.895881	0.981365	-0.239097	0.871008	0.865973
YJR153W	PGU1	4	1.00691	0.207151	0.0173654	0.303784	1.27942	0.861598	-0.00681893	1.25587	0.998047
YKL005C	BYE1	4	0.216265	0.605611	0.61296	-0.97063	0.364262	0.137895	-1.05677	0.514027	0.234861
YKL201C	MNN4	4	0.167608	0.500447	0.635565	2.27813	4.47198	0.703256	2.29058	4.59875	0.766205
YKR028W	SAP190	4	0.361657	0.609888	0.422119	0.400835	0.4408	0.480822	0.302393	0.489529	0.711846
YLL007C	YLL007C	4	-6.03555	0.225532	0.00154997	-1.01907	1.20865	0.513897	0.925217	1.2288	0.64469
YLL030C	RRT7	4	-0.126377	0.436411	0.679338	-0.952489	0.534445	0.243646	-0.926814	0.555897	0.308773
YLL044W	YLL044W	4	-0.706721	0.348662	0.0745893	-1.15246	0.374333	0.113315	-0.943289	0.386386	0.178432
YLL048C	YBT1	4	0.44279	0.711624	0.401892	-0.477169	0.67495	0.590776	-0.624347	0.679887	0.56735
YLL049W	LDB18	4	-0.882175	0.155373	0.0137077	6.51696	0.291129	0.00636081	6.97856	0.256704	0.00329628
YLR030W	YLR030W	4	-0.401067	0.432193	0.250086	-0.38956	0.415075	0.469345	-0.260275	0.369244	0.665003
YLR031W	YLR031W	4	0.559715	0.438068	0.158065	-0.301799	0.479269	0.636496	-0.482506	0.561334	0.598529
YLR032W	RAD5	4	-1.74753	1.2366	0.134463	-0.316766	0.96578	0.808051	0.251937	0.622498	0.80566
YLR034C	SMF3	4	0.0564002	0.34769	0.820332	0.916182	0.795435	0.394034	0.930071	0.719191	0.413289
YLR035C	MLH2	4	-0.475855	0.300986	0.111312	-1.25952	0.60984	0.202904	-1.1281	0.605501	0.271106
YLR036C	YLR036C	4	0.195404	0.349544	0.444985	-1.27548	0.716836	0.243711	-1.36261	0.7994	0.303379
YLR037C	PAU23	4	-0.739954	0.41204	0.0911047	-0.576773	0.25169	0.173641	-0.34213	0.203963	0.308773
YLR038C	COX12	4	0.224022	0.211628	0.207581	5.18091	0.632571	0.0205114	5.24898	0.587398	0.015224
YLR039C	RIC1	1	-5.72922	NA	NA	3.18484	NA	NA	5.13669	NA	NA
YLR040C	AFB1	4	1.58596	1.18972	0.148433	0.358707	1.06237	0.801376	-0.138673	1.17611	0.945394
YLR041W	YLR041W	4	-0.0895672	0.108367	0.290119	0.447251	1.70096	0.847551	0.496627	1.76856	0.864626
YLR146C	SPE4	4	-0.777291	0.55715	0.137385	-0.485214	0.782367	0.640222	-0.236105	0.703652	0.835023
YLR192C	HCR1	4	-8.05538	0.45419	0.00235724	-2.57338	1.10821	0.170885	-0.0123014	1.236	0.995553
YLR237W	THI7	4	-1.32006	0.361736	0.0275343	-0.0781205	1.014	0.960526	0.357746	1.09415	0.842331
YLR246W	ERF2	4	-0.601054	0.397981	0.119761	0.128756	0.563052	0.869668	0.336236	0.484858	0.670042
YLR343W	GAS2	4	0.771555	0.523438	0.125124	0.440198	1.01806	0.746773	0.209555	1.06068	0.901802
YLR361C	DCR2	4	-0.641296	0.159075	0.0235393	-0.570078	0.61315	0.473276	-0.367326	0.616645	0.722451
YLR394W	CST9	4	-0.0261432	0.164422	0.823983	-0.722386	0.847801	0.510283	-0.723421	0.831718	0.594427
YLR406C	RPL31B	4	-0.123914	0.418628	0.672539	0.0328821	1.22616	0.987411	0.0828626	1.27033	0.967016
YML022W	APT1	4	-0.375003	0.333244	0.19061	0.215968	0.518366	0.758298	0.35221	0.534418	0.691505
YML036W	CGI121	3	-10.2159	0.920126	0.0186998	-3.18618	1.13325	0.250049	0.0613997	1.04425	0.973549
YML038C	YMD8	4	-0.803549	0.46165	0.0959597	-1.02561	0.659276	0.290037	-0.781735	0.548	0.369253
YML041C	VPS71	4	-0.59491	0.578093	0.215569	0.758733	0.547294	0.329753	0.980267	0.540372	0.281035
YML047C	PRM6	4	-1.20267	0.58839	0.073789	-0.337642	0.939043	0.790256	0.0534637	1.07598	0.973474
YML067C	ERV41	4	-2.02043	0.54259	0.0267586	-0.790321	1.84885	0.750737	-0.145001	1.81499	0.96017
YML068W	ITT1	4	0.601778	0.79509	0.325251	0.432399	0.517825	0.51825	0.256729	0.306425	0.607376
YML070W	DAK1	4	0.137512	0.888367	0.828739	-0.419906	0.362689	0.392996	-0.466417	0.620467	0.644769
YML071C	COG8	4	0.498781	0.321935	0.114871	0.827717	0.832784	0.447808	0.695591	0.751441	0.564533
YML072C	TCB3	4	0.689697	0.110708	0.0115755	0.848811	0.816717	0.431322	0.65518	0.837814	0.633072
YML074C	FPR3	4	-0.705185	0.369927	0.0822758	-1.17176	0.627457	0.227871	-0.963577	0.576222	0.308773
YML086C	ALO1	4	0.270751	0.730392	0.599566	-0.798834	1.98042	0.765202	-0.898299	1.81946	0.766205
YML090W	YML090W	4	1.06759	0.186761	0.0136749	1.12083	0.646853	0.251398	0.811328	0.612249	0.402541
YML094W	GIM5	4	-4.01773	0.498453	0.00778606	4.85905	0.794769	0.0335728	6.29737	0.80523	0.0180229
YML096W	YML096W	4	0.093436	0.311463	0.668117	0.204585	0.542067	0.778513	0.188307	0.615141	0.854154
YML097C	VPS9	4	-5.87134	0.307513	0.0021901	0.118713	0.766337	0.912467	2.03863	0.857941	0.187437
YML100W	TSL1	4	-0.221169	0.106036	0.0715768	-0.493747	0.921587	0.683652	-0.425579	0.916367	0.77624
YML100W-A	YML100W-A	4	0.844446	0.253186	0.0326335	-0.059602	1.09318	0.975827	-0.326667	1.16133	0.864503
YML101C	CUE4	4	0.238871	0.248014	0.237424	0.116146	1.05521	0.940198	0.0503535	1.00951	0.973474
YML102C-A	YML102C-A	4	0.0964605	0.640691	0.834336	0.628109	0.588132	0.42283	0.621639	0.528157	0.46055
YML102W	CAC2	4	0.164844	0.454714	0.607365	0.540733	1.07886	0.708009	0.509815	1.07503	0.771662
YML103C	NUP188	4	-0.96256	0.489874	0.078029	0.899784	0.533742	0.262836	1.24439	0.698532	0.289631
YML104C	MDM1	4	0.0685157	0.327894	0.767224	-0.190307	0.92782	0.880897	-0.208547	0.943106	0.893617
YML107C	PML39	4	-0.239521	1.47725	0.820332	-0.590671	1.42152	0.758842	-0.519009	0.984694	0.753702
YML108W	YML108W	4	-0.0483314	0.382471	0.860381	-0.563209	1.00601	0.670435	-0.552978	1.02719	0.749191
YML109W	ZDS2	4	-0.402132	0.420554	0.239671	-0.741641	0.75154	0.451004	-0.620981	0.659915	0.555611
YML110C	COQ5	4	-3.58164	0.20346	0.00238311	6.22202	0.587627	0.0139646	7.55335	0.642756	0.0104248
YML111W	BUL2	4	0.0872938	0.260878	0.635565	-0.303431	1.75383	0.900764	-0.330655	1.86977	0.909877
YML116W	ATR1	4	0.757992	0.128674	0.0128567	0.335552	0.682178	0.709992	0.106649	0.686203	0.921332
YML117W	NAB6	4	-1.46556	0.177101	0.00738024	-0.43513	0.96469	0.737445	0.0389228	0.960786	0.978676
YML117W-A	YML117W-A	4	0.775986	0.400733	0.080012	-0.271234	0.967622	0.835092	-0.521443	1.07194	0.768383
YML118W	NGL3	4	-0.194926	0.826835	0.738235	-0.183486	1.18206	0.912467	-0.115941	1.14629	0.954383
YML119W	YML119W	4	0.226972	0.348593	0.384112	-0.0311934	1.21184	0.987641	-0.0968734	1.17232	0.959423
YML120C	NDI1	4	-0.617366	0.194753	0.0354965	0.433585	1.04895	0.760406	0.654133	1.13667	0.728024
YML122C	YML122C	4	-3.57125	0.271366	0.00362363	-1.03006	0.571604	0.241235	0.113126	0.589596	0.902266
YML123C	PHO84	4	-2.16431	0.245592	0.00659105	-1.03026	0.891295	0.39314	-0.344297	0.937344	0.820667
YML124C	TUB3	4	1.13777	0.360952	0.0356716	0.627791	0.582117	0.418066	0.282918	0.488331	0.727241
YML128C	MSC1	4	-0.0334952	0.250719	0.852384	1.03594	0.963389	0.419003	1.08209	0.919272	0.46055
YML131W	YML131W	4	0.115104	0.306884	0.596146	-0.173222	0.29614	0.65765	-0.206166	0.230696	0.579643
YMR004W	MVP1	4	0.32671	0.308327	0.20736	1.33181	1.05518	0.362845	1.26844	1.1715	0.497568
YMR048W	CSM3	4	0.398858	0.858362	0.517231	0.0319068	1.14231	0.987298	-0.0880236	1.12768	0.962081
YMR095C	SNO1	4	0.978353	0.118039	0.00737191	-0.653236	0.458056	0.318952	-0.978942	0.495266	0.251018
YMR096W	SNZ1	4	1.02141	0.236076	0.0209814	0.387652	0.864108	0.739187	0.0744726	0.909208	0.959423
YMR098C	ATP25	2	-6.75033	0.715193	0.107555	3.18861	0.0821516	0.130605	5.47239	0.148172	0.146518
YMR099C	YMR099C	4	1.17099	0.625338	0.0848715	-0.116816	0.705599	0.904634	-0.491457	0.667143	0.649213
YMR100W	MUB1	4	-4.7263	0.33444	0.00321917	-1.18815	1.29786	0.478374	0.326362	1.25175	0.874847
YMR101C	SRT1	4	0.501566	0.576122	0.271578	0.290046	0.734792	0.769399	0.143315	0.781684	0.905685
YMR102C	YMR102C	4	0.536075	0.680796	0.308578	-0.249186	0.575487	0.746685	-0.42087	0.679755	0.711846
YMR103C	YMR103C	4	1.8522	0.566033	0.0336734	0.0229188	0.607108	0.982461	-0.569534	0.675555	0.604836
YMR105C	PGM2	4	0.753969	0.705374	0.205054	-0.0274326	0.133951	0.880904	-0.264276	0.33039	0.623711
YMR106C	YKU80	4	-0.70987	0.367411	0.0803311	-0.87586	0.644252	0.334731	-0.658614	0.749418	0.589806
YMR109W	MYO5	4	-0.00948541	0.669897	0.983987	-0.442796	1.64053	0.842013	-0.442121	1.64459	0.870966
YMR111C	YMR111C	4	0.182699	0.711949	0.715506	-0.0759442	1.61976	0.979419	-0.128377	1.50798	0.959027
YMR114C	YMR114C	4	0.106963	0.696466	0.830318	-0.261869	1.16967	0.871615	-0.294427	0.993651	0.857257
YMR116C	ASC1	4	-2.9344	0.46869	0.0115755	3.73886	1.01375	0.0827346	4.79658	0.914071	0.0416244
YMR119W-A	YMR119W-A	4	-0.760308	0.31622	0.0562153	-0.592431	0.965738	0.644689	-0.351572	0.897283	0.810792
YMR120C	ADE17	4	-0.194588	0.463816	0.554649	0.0415	1.11753	0.982923	0.114667	1.18533	0.954383
YMR121C	RPL15B	4	0.122975	0.530125	0.742221	0.320793	0.43232	0.568897	0.297876	0.451655	0.691217
YMR122C	YMR122C	4	-0.246643	0.200981	0.168041	-0.254935	0.521658	0.710893	-0.172404	0.577824	0.856657
YMR123W	PKR1	4	-6.44567	0.549483	0.0043033	-1.22627	0.976361	0.365008	0.846022	1.1066	0.640561
YMR124W	EPO1	4	-0.0229371	0.464689	0.947623	1.02899	0.19878	0.046486	1.07153	0.097114	0.0109596
YMR126C	DLT1	4	-0.653902	0.230281	0.0424437	-0.647973	0.858134	0.56241	-0.443108	0.935514	0.771662
YMR127C	SAS2	4	1.46342	0.715066	0.0737384	0.703244	0.207851	0.0949259	0.254466	0.208039	0.443176
YMR129W	POM152	4	-0.0781188	0.37467	0.767566	-0.159796	0.324628	0.709992	-0.129607	0.265635	0.768227
YMR130W	YMR130W	4	-0.253517	0.390433	0.385203	-0.330676	0.696172	0.720312	-0.247841	0.616007	0.806739
YMR132C	JLP2	4	0.955548	0.433615	0.0651196	0.244122	0.592522	0.760454	-0.0513101	0.508293	0.954383
YMR133W	REC114	4	1.08203	0.374542	0.0410973	0.613161	1.07973	0.665413	0.286028	1.00515	0.8632
YMR135C	GID8	4	0.693759	1.47034	0.511738	-0.671349	0.254442	0.140315	-0.905031	0.619401	0.359444
YMR135W-A	YMR135W-A	4	-0.312338	0.260177	0.173593	-0.499784	0.8143	0.644689	-0.402142	0.91657	0.787424
YMR136W	GAT2	4	-0.528714	0.410414	0.156135	-0.0621716	0.508259	0.933512	0.116936	0.464611	0.876952
YMR137C	PSO2	4	-0.210295	0.663068	0.651469	-0.295031	0.936936	0.817115	-0.225334	0.809773	0.864987
YMR138W	CIN4	4	0.402182	0.528786	0.323399	-0.0486791	0.968767	0.97762	-0.171743	0.974119	0.909877
YMR154C	RIM13	4	-2.32304	0.687086	0.0318482	0.654173	0.60548	0.418066	1.43464	0.448348	0.111619
YMR158W	MRPS8	1	-5.46771	NA	NA	-0.552209	NA	NA	1.21944	NA	NA
YMR171C	EAR1	4	-0.0498713	0.083482	0.41922	0.268306	0.314103	0.50887	0.300223	0.342982	0.591493
YMR172W	HOT1	4	-0.104962	0.498612	0.765395	-0.529665	0.835236	0.63274	-0.500176	0.971514	0.759052
YMR173W	DDR48	4	-0.801172	0.463218	0.097019	-0.394686	0.30416	0.355174	-0.13551	0.222225	0.717957
YMR181C	YMR181C	4	0.666398	0.333769	0.0762238	0.316728	0.717253	0.74288	0.117111	0.821445	0.930767
YMR198W	CIK1	4	-4.38073	1.68844	0.0489594	3.35826	1.52669	0.184457	4.8763	1.03416	0.0515174
YMR209C	YMR209C	4	0.731285	0.312724	0.0589162	-0.165924	0.665873	0.856096	-0.398923	0.754671	0.753702
YMR271C	URA10	4	0.471578	0.442334	0.205734	0.508302	1.0739	0.721389	0.376878	1.03841	0.821763
YMR279C	YMR279C	4	0.40226	0.317365	0.160012	-0.792779	0.456929	0.251398	-0.934827	0.538201	0.297333
YMR306W	FKS3	4	1.56227	1.29583	0.172438	0.841428	0.758056	0.408183	0.364048	0.38218	0.555611
YMR311C	GLC8	4	-0.211266	0.552695	0.589994	-0.169836	1.29822	0.926322	-0.0966332	1.1978	0.960144
YMR312W	ELP6	4	-5.94233	0.713523	0.00732017	-1.72309	0.267706	0.0313281	0.17297	0.387902	0.782241
YMR313C	TGL3	4	-0.410351	0.268898	0.117694	-0.121237	1.28293	0.949582	0.0179001	1.2498	0.994843
YMR315W	YMR315W	4	0.371985	1.45801	0.716736	0.139418	0.728738	0.890033	0.03096	1.14097	0.987669
YMR316C-A	YMR316C-A	4	-1.17798	1.28035	0.252472	-0.930669	0.891331	0.429354	-0.562696	0.66337	0.603212
YMR316C-B	YMR316C-B	4	0.167313	0.242226	0.361034	-0.198543	0.488295	0.763583	-0.249099	0.52858	0.773415
YMR318C	ADH6	4	-0.281268	0.327679	0.276251	-0.369747	0.436879	0.512843	-0.278889	0.531114	0.753702
YMR319C	FET4	4	-0.52763	0.464957	0.188361	-0.410274	0.691763	0.655172	-0.240388	0.605837	0.810248
YMR320W	YMR320W	4	-0.124881	0.147078	0.280533	-0.640624	0.703206	0.479791	-0.607489	0.688015	0.586975
YNL279W	PRM1	4	0.648249	0.535343	0.17119	-0.430522	0.548661	0.548428	-0.643279	0.593961	0.497568
YNL300W	TOS6	4	0.0299275	0.0984359	0.664699	0.0685428	0.415543	0.904948	0.0694378	0.456356	0.922905
YNL316C	PHA2	4	0.845583	0.408924	0.0723494	-0.0198809	0.658957	0.986585	-0.286303	0.638841	0.781477
YOL016C	CMK2	4	-0.520827	0.961041	0.457037	-0.745711	0.557082	0.340821	-0.586582	0.486434	0.449181
YOL090W	MSH2	4	-2.16487	0.300255	0.00944048	0.614415	1.33637	0.72956	1.34246	1.27594	0.513531
YOL114C	YOL114C	4	-0.519524	0.420536	0.166464	-0.819416	0.657955	0.369205	-0.662588	0.698349	0.555611
YOL126C	MDH2	4	-0.568871	0.718825	0.306371	-0.466714	0.805632	0.659504	-0.284864	1.03508	0.865773
YOL141W	PPM2	4	0.32587	0.823056	0.576572	0.0197303	0.924269	0.98955	-0.0767911	0.955871	0.960144
YOL158C	ENB1	4	0.255195	0.562821	0.526517	0.268151	0.795066	0.801376	0.200926	0.949814	0.896056
YOL159C	YOL159C	4	1.29959	0.0684875	0.0021901	0.203767	1.00711	0.881898	-0.204498	1.02585	0.901293
YOL160W	YOL160W	4	1.76261	0.930064	0.08308	-0.280243	0.337463	0.520329	-0.851306	0.348962	0.178432
YOL163W	YOL163W	4	1.13452	0.126188	0.00646599	-0.733819	0.174414	0.068578	-1.11233	0.173824	0.0276886
YOR300W	YOR300W	4	0.700239	0.62892	0.193466	-0.655126	0.800473	0.528388	-0.890501	0.681137	0.407246
YOR306C	MCH5	4	-0.649368	0.524157	0.165799	-0.261875	0.716461	0.78631	-0.0486468	0.587099	0.959423
YOR317W	FAA1	4	1.17058	0.94873	0.166609	0.205049	0.55146	0.781154	-0.161258	0.689152	0.887616
YPL132W	COX11	4	-3.86344	0.468602	0.00741155	5.35577	0.212027	0.00565464	6.75661	0.131194	0.0020425
YPL134C	ODC1	4	0.363463	0.662794	0.452715	0.802189	0.858985	0.471756	0.713387	0.94736	0.64469
YPL183C	RTT10	4	-1.04685	0.7471	0.136467	-0.178671	0.629602	0.832758	0.165847	0.471248	0.827561
YPL183W-A	RTC6	4	3.58739	0.33789	0.00504285	3.87931	0.272636	0.00953548	2.82122	0.281176	0.0130576
YPL189W	GUP2	4	-0.562688	0.279005	0.0752172	-0.266475	0.465038	0.661721	-0.0815326	0.513348	0.918934
YPL224C	MMT2	4	-0.181362	0.492878	0.602107	0.341789	0.853797	0.767614	0.418308	0.862823	0.768383
YAL024C	LTE1	4	2.8584	0.761648	0.026428	7.49445	0.614257	0.011806	6.79674	0.5303	0.0100081
YAL037C-A	YAL037C-A	4	0.715607	0.662956	0.202205	-0.842638	0.729419	0.393295	-1.06653	0.568684	0.269163
YAL044W-A	YAL044W-A	4	2.15488	1.02893	0.0710948	0.897095	0.966236	0.473276	0.248662	0.958362	0.874847
YAL067W-A	YAL067W-A	4	-0.190735	0.516628	0.60076	-0.221954	1.27997	0.900736	-0.131252	1.19135	0.948707
YAR002C-A	ERP1	4	-0.0604249	1.00476	0.934891	0.416126	0.976883	0.751927	0.481623	0.999633	0.768383
YAR035C-A	YAR035C-A	4	0.0627238	0.644489	0.891452	-0.00729116	0.57623	0.993977	0.00612366	0.78184	0.995657
YBL008W-A	YBL008W-A	4	0.436098	0.214977	0.0745893	0.491727	0.545105	0.483828	0.396322	0.54093	0.649213
YBL029C-A	YBL029C-A	4	0.0125872	0.176807	0.922596	-0.378448	1.47811	0.853268	-0.358795	1.48797	0.881971
YBL039W-A	YBL039W-A	4	-0.114808	0.443314	0.712619	-0.177922	0.679449	0.847551	-0.110931	0.679401	0.917045
YBL101W-C	YBL101W-C	4	-0.128426	0.0579097	0.0646405	-1.09406	0.742036	0.307484	-1.04783	0.762409	0.385018
YBR020W	GAL1	4	-1.20245	0.103988	0.00439256	-0.460846	0.732448	0.636853	-0.0446242	0.785796	0.971187
YBR056W-A	YBR056W-A	4	0.630102	0.979629	0.388676	-0.39123	0.317767	0.370377	-0.57463	0.102071	0.0359188
YBR072C-A	YBR072C-A	4	1.86453	1.45035	0.1566	-0.108142	0.945701	0.937974	-0.688948	0.714505	0.552732
YBR075W	YBR075W	4	-0.704174	0.544086	0.155048	0.362406	0.710572	0.703256	0.637735	0.574942	0.488714
YBR083W	TEC1	4	2.79036	1.10559	0.051609	1.14535	1.56153	0.574223	0.295158	1.5209	0.901944
YBR084C-A	RPL19A	1	-2.53198	NA	NA	-1.4646	NA	NA	-0.639599	NA	NA
YBR085C-A	YBR085C-A	4	2.86549	1.27852	0.0635648	1.64106	0.865319	0.225423	0.779849	0.533546	0.359444
YBR090C	YBR090C	4	0.518764	0.565507	0.253465	0.16267	0.112979	0.315098	0.0310693	0.24846	0.941364
YBR100W	YBR100W	4	0.243784	0.555652	0.538701	0.344483	1.11116	0.819131	0.308151	1.29541	0.884881
YBR111W-A	SUS1	4	-3.627	1.18473	0.037588	-1.52246	0.685034	0.181947	-0.339609	1.05004	0.84452
YBR131W	CCZ1	4	-3.93009	1.66818	0.0580838	-0.242546	1.17296	0.880667	1.07503	0.921955	0.46703
YBR150C	TBS1	4	0.828654	0.559221	0.124289	-0.489578	1.89054	0.851131	-0.74086	1.76336	0.7951
YBR182C-A	YBR182C-A	4	0.459187	0.604911	0.323961	0.0527265	0.838412	0.97176	-0.0623455	0.780052	0.96017
YBR196C-B	YBR196C-B	4	0.529148	0.481496	0.196965	0.134708	0.690022	0.885417	-0.00107175	0.766683	0.999359
YBR200W-A	YBR200W-A	4	-0.195299	0.229836	0.280257	-0.552126	0.56003	0.451004	-0.469017	0.557323	0.605171
YBR270C	BIT2	4	-1.10315	0.727968	0.119024	-0.544771	0.70791	0.554998	-0.163456	0.641621	0.876812
YBR272C	HSM3	4	0.250696	0.232728	0.202879	-0.0156443	0.769521	0.990395	-0.0641615	0.782823	0.959423
YBR275C	RIF1	4	0.0564221	0.470829	0.866493	0.550332	1.33502	0.760454	0.58117	1.22988	0.771662
YBR276C	PPS1	4	1.11134	0.745354	0.122763	0.792909	0.440762	0.241554	0.484147	0.561617	0.598529
YBR280C	SAF1	4	-0.358942	0.317651	0.189348	0.0159427	1.52588	0.994745	0.168409	1.53244	0.948707
YBR287W	YBR287W	4	0.691846	0.74576	0.250086	0.608104	0.764897	0.542653	0.431954	0.869987	0.766205
YBR296C-A	YBR296C-A	4	1.58244	0.21616	0.00924324	0.924398	0.533037	0.251398	0.464618	0.537084	0.59718
YBR299W	MAL32	4	0.164833	0.14018	0.178745	-0.480546	1.0087	0.719054	-0.51368	1.00543	0.763099
YBR301W	PAU24	4	1.42858	1.59941	0.262157	0.165364	1.09842	0.914273	-0.264812	0.742897	0.825347
YCL001W-B	YCL001W-B	3	-0.421234	1.64141	0.763484	-0.382535	1.23827	0.85428	-0.220593	0.832352	0.894955
YCL026C-A	FRM2	4	-0.13921	0.738565	0.790886	-0.05313	0.602508	0.954625	0.0253077	0.826312	0.985669
YCL057C-A	MIC10	4	-0.0245525	0.776888	0.966342	0.319435	0.499784	0.630228	0.370495	0.483015	0.640561
YCR030C	SYP1	3	-0.876269	1.33016	0.470447	-0.669537	0.14116	0.149381	-0.366132	0.463649	0.711846
YCR032W	BPH1	1	-0.43657	NA	NA	1.75295	NA	NA	1.97873	NA	NA
YCR048W	ARE1	4	-1.31421	0.777026	0.100709	-0.602287	0.570796	0.427563	-0.153278	0.781205	0.901868
YCR060W	TAH1	4	-0.0155977	1.05513	0.983297	-0.551559	0.386093	0.318758	-0.527421	0.599677	0.589806
YCR062W	YCR062W	4	-0.287359	0.278818	0.215269	-0.189849	0.629509	0.822463	-0.0665464	0.60773	0.948707
YCR069W	CPR4	4	-1.00362	0.595568	0.101425	0.386659	0.899801	0.749226	0.760949	1.10333	0.673141
YCR073C	SSK22	4	1.0804	1.30267	0.288926	0.216805	0.756106	0.832191	-0.0976617	0.982271	0.954383
YCR075C	ERS1	4	-0.395452	0.444122	0.263533	-1.05194	0.798241	0.348791	-0.916898	0.824995	0.488577
YCR088W	ABP1	4	-0.55461	0.392016	0.134176	-0.118344	1.67496	0.964239	0.0946532	1.61552	0.971187
YCR089W	FIG2	4	-0.349708	0.505227	0.36041	0.0511974	0.990884	0.977113	0.201604	0.935917	0.895576
YDL085C-A	YDL085C-A	4	0.0239263	0.455645	0.944268	0.74907	0.879672	0.510283	0.796047	0.766062	0.516899
YDL159W-A	YDL159W-A	4	-1.67153	0.437158	0.0256885	-0.483718	1.10577	0.744651	0.0858477	1.11949	0.962582
YDL160C-A	MHF2	4	0.859068	0.522087	0.105474	-0.265738	0.86704	0.819533	-0.52084	0.827431	0.707002
YDL194W	SNF3	4	-0.172325	0.894157	0.78646	-0.666281	0.501659	0.344768	-0.593857	0.459228	0.413289
YDR003W-A	YDR003W-A	4	0.130421	0.473449	0.693889	-0.289911	1.00223	0.830891	-0.306499	1.02667	0.856657
YDR007W	TRP1	4	-1.15496	0.295735	0.0249036	-0.692716	0.352919	0.216415	-0.298469	0.440238	0.677161
YDR034W-B	YDR034W-B	4	1.15666	0.677552	0.099178	0.527136	0.889023	0.655172	0.196182	0.877202	0.893177
YDR048C	YDR048C	4	-1.88762	0.0877169	0.00191657	-0.825978	0.881794	0.469779	-0.194905	0.931261	0.896769
YDR058C	TGL2	4	0.558837	0.401071	0.137723	-0.67354	0.350802	0.223368	-0.841319	0.233954	0.0883021
YDR169C-A	YDR169C-A	4	-0.352216	0.870705	0.568124	-0.24252	0.635533	0.776567	-0.0993779	0.400823	0.878406
YDR182W-A	YDR182W-A	4	-0.555618	0.0599666	0.00615045	0.344591	0.740609	0.72691	0.570666	0.741385	0.638844
YDR194W-A	YDR194W-A	4	-0.885546	0.441712	0.0759147	-0.274798	0.709878	0.773642	0.0425215	0.77247	0.971187
YDR202C	RAV2	4	-0.801837	0.619407	0.155048	5.1577	0.383003	0.0105095	5.59712	0.326919	0.00654701
YDR205W	MSC2	4	0.842004	0.298087	0.0427598	-0.236453	1.02462	0.868014	-0.485148	1.0205	0.771029
YDR242W	AMD2	4	-0.205474	0.734136	0.68953	-0.218364	0.702605	0.819131	-0.122725	0.811993	0.923092
YDR246W-A	YDR246W-A	4	0.301871	0.77307	0.581973	0.116734	0.738218	0.909709	0.0550634	0.815046	0.964974
YDR326C	YSP2	4	0.0560493	0.246339	0.74526	-0.217999	0.873334	0.856096	-0.208195	0.91759	0.891142
YDR379C-A	SDH6	4	-0.214051	0.495732	0.544376	-0.0362218	0.607339	0.973136	0.0672478	0.724163	0.956269
YDR444W	YDR444W	4	-0.0680932	0.457321	0.835094	0.142839	1.34394	0.941686	0.203329	1.2578	0.917812
YDR445C	YDR445C	4	0.0400834	0.198954	0.776206	0.193013	0.434144	0.741082	0.219375	0.442079	0.766205
YDR461W	MFA1	4	-0.422989	0.202961	0.0715891	-1.03674	0.983246	0.427563	-0.892231	0.957362	0.560357
YDR493W	MZM1	4	2.27255	0.303674	0.00887295	1.13393	0.450395	0.152545	0.453389	0.442638	0.523032
YDR512C	EMI1	4	-1.67776	0.120319	0.00332499	2.60605	0.298294	0.0193241	3.26274	0.323071	0.0129747
YDR515W	SLF1	4	-0.199557	0.354259	0.442149	0.0751009	0.208766	0.790256	0.176878	0.191285	0.564749
YDR524C-B	YDR524C-B	4	0.9383	1.01508	0.251322	1.37986	1.17162	0.386437	1.14406	0.874093	0.40704
YDR524W-A	YDR524W-A	4	2.09207	0.891461	0.0585232	0.919605	0.915302	0.443607	0.292408	0.857234	0.832909
YER087C-B	SBH1	4	0.997224	1.09996	0.25728	-0.800064	0.737418	0.418066	-1.11523	0.913104	0.443255
YER089C	PTC2	4	-0.0795988	0.399781	0.7788	0.101971	1.18251	0.955771	0.165112	1.23818	0.936185
YER175W-A	YER175W-A	4	1.48856	1.53324	0.235069	0.706209	0.549629	0.358115	0.27124	0.434033	0.708611
YER180C-A	SLO1	4	0.391835	1.20734	0.644964	-0.995129	0.978568	0.44081	-1.11694	0.726677	0.341223
YER186W-A	YER186W-A	4	0.0386806	0.479157	0.910995	-0.308098	0.912278	0.801376	-0.295074	0.972248	0.854893
YFL001W	DEG1	3	-9.78066	0.164114	0.00321917	-2.96038	2.06841	0.434571	0.202822	2.17404	0.962345
YFL003C	MSH4	4	0.294957	0.488349	0.414915	0.715113	0.702472	0.44081	0.672188	0.631142	0.508066
YFL004W	VTC2	4	0.512466	0.705831	0.342629	0.3477	1.25824	0.836597	0.223261	1.1536	0.902184
YFL012W	YFL012W	4	-0.560921	0.192701	0.0405601	0.118789	1.12457	0.941783	0.340387	1.16621	0.861056
YFL013C	IES1	4	-0.654172	0.358324	0.0888885	0.383989	0.305867	0.365008	0.643499	0.387233	0.308939
YFL014W	HSP12	4	0.734932	0.318031	0.0602995	1.01825	0.452714	0.17935	0.839246	0.51407	0.315474
YFL019C	YFL019C	4	-0.830722	0.721351	0.184568	0.0639891	0.767602	0.956652	0.372641	0.624231	0.721434
YFL033C	RIM15	3	1.00494	0.094017	0.0196884	0.366488	0.569071	0.702602	0.0809102	0.595337	0.948707
YFL041W-A	YFL041W-A	4	-0.710608	1.14988	0.404896	-1.18686	1.51877	0.550127	-0.952078	1.47905	0.699803
YFL042C	YFL042C	4	-0.530878	0.926357	0.434898	0.0538728	1.17703	0.979696	0.263822	1.40282	0.903267
YFL060C	SNO3	4	-0.479415	0.221087	0.0668643	0.232866	0.332931	0.594369	0.430851	0.29692	0.36214
YFL063W	YFL063W	4	-0.104858	0.304842	0.62562	0.0263129	0.231587	0.938891	0.0956619	0.256725	0.820667
YFR011C	MIC19	4	0.982274	0.370704	0.0477903	-0.348121	1.01967	0.800693	-0.645934	1.01326	0.70511
YFR012W-A	YFR012W-A	4	-0.480473	0.759465	0.395193	0.0110774	0.776545	0.993049	0.203303	0.886569	0.890342
YFR013W	IOC3	4	0.134945	0.31725	0.550102	0.0615193	1.02678	0.973136	0.0531221	0.96258	0.971187
YFR024C	YFR024C	4	0.4762	0.567775	0.284443	-0.299758	0.670548	0.739892	-0.43012	0.723251	0.722657
YFR030W	MET10	4	0.177638	0.446398	0.574811	0.290712	0.864826	0.801496	0.274612	0.821824	0.836727
YFR032C-B	YFR032C-B	3	-0.0833897	1.00553	0.925396	-0.506718	0.963427	0.752321	-0.459093	1.27191	0.857692
YGL041C-B	YGL041C-B	4	0.422032	0.372598	0.18864	-0.319899	1.27847	0.856096	-0.433035	1.37015	0.849465
YGR028W	MSP1	4	11.8339	0.523096	0.00182669	9.60056	0.583236	0.00883762	6.01464	0.651976	0.0144192
YGR032W	GSC2	4	3.74948	1.03296	0.0277731	1.18717	0.963574	0.370377	0.0232916	0.761799	0.985669
YGR035W-A	YGR035W-A	4	1.00276	0.828534	0.171288	0.661771	0.507573	0.352853	0.385039	0.746766	0.759052
YGR038W	ORM1	4	-0.299614	0.185178	0.108005	0.0581419	1.01434	0.973395	0.192296	1.03065	0.903963
YGR040W	KSS1	4	0.637512	0.275791	0.0602948	-0.278688	0.509003	0.676585	-0.461421	0.476984	0.549943
YGR050C	YGR050C	4	-0.191228	0.386961	0.492498	-0.259162	0.372619	0.597361	-0.169323	0.320994	0.753702
YGR106C	VOA1	4	0.971186	0.936929	0.213739	-0.10164	0.761582	0.925038	-0.389026	0.524394	0.647657
YGR110W	CLD1	4	-1.22269	0.462238	0.047899	-0.541845	0.999364	0.680046	-0.121211	1.10801	0.948707
YGR117C	YGR117C	4	1.62903	0.654305	0.0525914	-0.216369	0.298485	0.57755	-0.722853	0.211079	0.096892
YGR121W-A	YGR121W-A	4	0.681872	1.21357	0.443235	0.356357	1.66973	0.875944	0.176549	1.35612	0.937549
YGR122C-A	YGR122C-A	4	-0.200001	0.430139	0.517118	0.331644	0.369707	0.485795	0.440631	0.403369	0.493447
YGR146C-A	YGR146C-A	4	-0.320738	0.134001	0.0566497	-0.338595	0.570456	0.655172	-0.208431	0.586662	0.826016
YGR169C-A	LSO2	4	-1.95098	0.496231	0.0247218	-0.528903	0.796766	0.615493	0.131149	0.685009	0.902266
YGR238C	KEL2	4	-0.379594	0.276281	0.141015	-0.22335	0.680245	0.808051	-0.0706937	0.70965	0.954383
YGR254W	ENO1	4	0.133702	0.400805	0.636014	-0.39437	0.920551	0.750127	-0.414912	1.0618	0.810792
YGR258C	RAD2	4	0.640818	0.625466	0.216988	0.752181	0.776589	0.456687	0.596748	0.719269	0.610815
YGR271W	SLH1	4	-0.99712	0.90127	0.194852	-1.04531	0.610174	0.255007	-0.712578	0.639129	0.487609
YGR273C	YGR273C	4	0.233251	0.174457	0.147639	-0.102363	0.711369	0.919362	-0.147542	0.709705	0.896893
YGR276C	RNH70	4	0.0557278	0.436759	0.85898	-0.673917	0.495453	0.334731	-0.676561	0.601503	0.484507
YGR291C	YGR291C	4	1.06991	0.598464	0.0918897	0.294914	1.4359	0.880897	-0.0139604	1.65174	0.995553
YGR292W	MAL12	4	0.0356153	0.327602	0.878778	-0.170171	0.784012	0.873229	-0.152343	0.843208	0.906496
YHL015W-A	YHL015W-A	4	-0.862751	0.661286	0.15368	-0.246007	1.05447	0.86546	0.0646223	0.92935	0.964588
YHR007C-A	YHR007C-A	4	-1.04022	0.45133	0.0603758	-0.108511	0.527133	0.880897	0.26416	0.554646	0.77063
YHR050W-A	YHR050W-A	4	1.30794	0.760182	0.0977834	3.22911	0.580948	0.040684	2.92289	0.58807	0.0466091
YHR086W-A	YHR086W-A	4	0.192971	0.542381	0.613808	-1.09283	0.597137	0.235145	-1.15206	0.563219	0.237239
YHR132W-A	IGO2	4	1.50469	0.0918193	0.00266214	0.00603227	0.7543	0.995879	-0.453514	0.772628	0.723048
YHR146W	CRP1	4	-0.627523	0.764192	0.292815	-0.598906	0.891988	0.611693	-0.375207	1.05933	0.827062
YHR171W	ATG7	4	-0.347966	0.743377	0.514451	-0.593759	1.32289	0.739187	-0.461684	1.37144	0.833759
YHR175W-A	YHR175W-A	4	-0.276097	0.165895	0.103645	0.528071	0.668881	0.545603	0.667445	0.669567	0.536794
YIL002W-A	YIL002W-A	4	-0.190101	0.0973234	0.0788533	-0.677233	1.00365	0.609776	-0.599275	1.04268	0.728024
YIL046W-A	YIL046W-A	4	-0.0133291	0.687462	0.978091	-0.136481	0.477267	0.832191	-0.101659	0.365875	0.864987
YIL058W	YIL058W	4	-0.488055	0.302532	0.108332	-0.0399513	0.51183	0.960036	0.153358	0.520432	0.858711
YIL092W	YIL092W	4	1.51282	0.895238	0.100873	0.295911	1.17912	0.856096	-0.15832	1.07771	0.927698
YIL134C-A	YIL134C-A	4	0.337839	0.406266	0.287826	-0.364067	0.586549	0.640222	-0.450783	0.713236	0.706177
YIR021W-A	YIR021W-A	4	1.33843	0.662238	0.0748452	0.715069	0.709264	0.44308	0.329623	0.696908	0.771662
YIR023W	DAL81	4	-2.53338	0.667325	0.0259577	-1.30866	1.54975	0.513664	-0.478904	1.54708	0.853851
YIR030C	DCG1	4	0.411041	0.41163	0.225553	0.208725	0.384225	0.679492	0.113753	0.433445	0.874847
YIR032C	DAL3	4	-0.122639	0.170828	0.346582	0.193881	0.682575	0.832758	0.273681	0.709763	0.811058
YIR043C	YIR043C	4	0.998223	0.39711	0.0517865	-0.478355	1.36471	0.79436	-0.784989	1.37938	0.728402
YIR044C	YIR044C	4	1.20656	0.697094	0.0968947	0.086798	0.77072	0.93927	-0.272661	1.01659	0.871348
YJL012C-A	YJL012C-A	4	0.37865	0.354619	0.205332	0.181322	0.761107	0.861179	0.096227	0.725608	0.936873
YJL042W	MHP1	4	-0.22234	0.683546	0.644531	-0.540829	0.939544	0.661412	-0.448532	1.0479	0.7906
YJL047C-A	YJL047C-A	4	-0.439552	0.445351	0.229742	-0.216395	0.935869	0.86753	-0.043865	0.892432	0.973549
YJL062W-A	COA3	4	-1.99984	1.17726	0.0999981	5.35052	0.596312	0.0182499	6.1885	0.689543	0.0151693
YJL070C	YJL070C	4	-0.0627045	0.115683	0.457037	-1.27954	0.496904	0.14789	-1.25999	0.515593	0.178432
YJL077W-B	YJL077W-B	4	-0.439045	0.741173	0.422551	-1.10057	0.857897	0.358115	-0.952551	0.648517	0.358884
YJL078C	PRY3	4	0.615652	0.840371	0.338748	-0.527497	1.3444	0.770738	-0.709905	1.56734	0.779342
YJL094C	KHA1	4	-1.02547	0.171832	0.012592	-0.328468	1.13485	0.830891	0.033302	1.19433	0.987247
YJL101C	GSH1	3	-21.4924	2.25644	0.0222034	-5.60673	1.0903	0.134513	1.32799	0.614939	0.368887
YJL103C	GSM1	4	-0.068092	0.174911	0.582935	0.246249	0.540337	0.732848	0.309585	0.544083	0.728402
YJL105W	SET4	4	0.546168	0.670725	0.29575	-0.082226	1.38068	0.973136	-0.229566	1.49594	0.922794
YJL127C-B	YJL127C-B	4	0.619789	0.385582	0.108774	0.412129	1.04594	0.769669	0.254235	0.999214	0.876952
YJL128C	PBS2	4	1.07458	0.31919	0.0320948	0.368308	0.745063	0.709992	0.0599212	0.794821	0.962582
YJL136W-A	YJL136W-A	4	-0.764001	0.199038	0.0255899	-0.522691	0.330332	0.284815	-0.252094	0.375723	0.681404
YJL137C	GLG2	4	-0.591193	0.399955	0.124611	0.0619338	0.727004	0.955793	0.291903	0.837457	0.827561
YJL141C	YAK1	4	0.616518	0.126562	0.0173164	0.0705864	1.46748	0.978775	-0.0956377	1.47465	0.967016
YJL151C	SNA3	4	0.403891	0.721739	0.444813	0.183331	1.50022	0.933512	0.0900064	1.42872	0.967739
YJL175W	YJL175W	4	-3.3989	0.547208	0.0115755	0.454106	1.53899	0.826714	1.6165	1.54994	0.515509
YJL177W	RPL17B	4	-0.700353	0.449354	0.113794	-0.696189	0.76311	0.479196	-0.451263	0.679395	0.686778
YJL189W	RPL39	2	3.83135	0.314366	0.0910516	0.00142405	1.01631	0.999748	-1.22198	1.14748	0.754928
YJR003C	YJR003C	4	0.551323	0.225454	0.0545548	0.137273	1.16952	0.93603	-0.00571457	1.15987	0.998557
YJR005C-A	LSO1	4	-0.0572791	0.252228	0.745583	0.369213	0.964918	0.776029	0.432386	0.978189	0.785374
YJR135W-A	TIM8	4	-0.71906	0.174071	0.0223558	-0.263548	0.832446	0.816493	-0.000568409	0.878976	0.999359
YJR151W-A	YJR151W-A	1	-1.05669	NA	NA	-0.1865	NA	NA	0.189428	NA	NA
YKL018C-A	YKL018C-A	4	0.538263	0.235421	0.0611725	-0.178289	0.642839	0.836137	-0.325679	0.583956	0.735455
YKL068W-A	YKL068W-A	4	-0.316531	0.264911	0.174676	-0.469411	0.694052	0.609236	-0.34423	0.797656	0.79037
YKL096C-B	YKL096C-B	4	0.93511	0.872268	0.204076	-0.30728	0.816571	0.779454	-0.588487	0.666934	0.586975
YKL096W-A	CWP2	4	0.143556	0.374687	0.589238	-0.379868	0.518464	0.574505	-0.403246	0.445387	0.575679
YKL106C-A	YKL106C-A	4	0.807788	0.342556	0.0580543	0.724018	0.72626	0.446528	0.513001	0.845472	0.718306
YKL115C	YKL115C	4	-0.246994	0.273894	0.258653	-0.181196	0.996004	0.895836	-0.0709049	0.995897	0.964588
YKL215C	OXP1	4	-0.481377	0.252297	0.0822758	-1.27226	1.12896	0.40566	-1.11508	1.17053	0.555611
YKL220C	FRE2	4	0.186506	0.279585	0.375262	-0.109584	0.38046	0.831095	-0.139617	0.459857	0.854893
YKR010C	TOF2	4	-0.517341	0.697501	0.334238	0.0149716	0.700635	0.98955	0.219406	0.901071	0.881469
YKR023W	YKR023W	4	-0.73588	0.578889	0.159518	-0.0416376	1.22349	0.983849	0.232974	1.06937	0.894963
YKR027W	BCH2	4	0.776874	0.69846	0.193796	-0.40226	0.821171	0.710174	-0.634141	1.0218	0.711846
YKR039W	GAP1	4	-0.516233	0.550137	0.246213	-0.59011	0.446587	0.348061	-0.402701	0.629288	0.702647
YKR040C	YKR040C	4	0.343705	0.531036	0.386302	0.678173	1.08948	0.639424	0.61823	0.985668	0.707002
YKR041W	YKR041W	4	0.380856	0.389962	0.23317	-1.28203	0.974205	0.349367	-1.40814	0.93879	0.353313
YKR053C	YSR3	4	1.41329	0.434681	0.0339363	-0.256162	1.23293	0.880366	-0.692925	1.40332	0.766205
YKR095W	MLP1	4	1.62526	0.709837	0.0611049	0.56685	0.904995	0.63817	0.0831714	1.08969	0.962582
YKR096W	ESL2	4	-0.599039	0.522184	0.185621	-0.393183	1.4082	0.835455	-0.17317	1.57518	0.948707
YLR110C	CCW12	4	-1.06937	0.337676	0.0354965	4.35901	1.05667	0.0697709	4.86426	1.17156	0.0682315
YLR312C-B	YLR312C-B	4	2.65157	1.39512	0.0826142	0.535258	0.157126	0.0936454	-0.286178	0.535608	0.750912
YLR455W	PDP3	4	1.31936	0.436241	0.0382076	-0.123448	1.54472	0.959162	-0.525724	1.64195	0.845911
YML066C	SMA2	4	-0.17931	0.366009	0.495723	-0.257838	0.324847	0.543449	-0.171874	0.221777	0.637041
YMR037C	MSN2	4	0.961285	0.789794	0.169704	0.341245	1.11174	0.819533	0.0693033	1.1888	0.971187
YMR074C	YMR074C	4	0.00737397	0.738602	0.988539	0.996711	0.580107	0.254591	1.05594	0.434636	0.179101
YMR104C	YPK2	4	0.0850432	0.365577	0.741681	-0.985027	0.333896	0.119256	-1.00586	0.282767	0.0900981
YMR105W-A	YMR105W-A	4	-1.04109	0.22991	0.0194256	0.158687	0.424051	0.78024	0.539001	0.367546	0.358884
YMR118C	SHH3	4	0.1829	0.478955	0.590285	0.28134	0.644105	0.744727	0.263255	0.594611	0.784785
YMR119W	ASI1	4	-0.332855	0.755343	0.537282	0.575563	0.98829	0.65765	0.734876	0.798772	0.566347
YMR322C	SNO4	4	0.168303	0.233891	0.346049	-0.789603	0.958082	0.524785	-0.832386	0.908355	0.56772
YNL011C	YNL011C	4	-0.612704	0.344913	0.0929101	-0.0919073	1.248	0.962768	0.140887	1.28399	0.948707
YNL018C	YNL018C	4	-0.718022	0.338541	0.0694452	-0.708506	0.543967	0.353118	-0.458119	0.558967	0.617493
YNL047C	SLM2	4	0.852922	0.665251	0.157269	-0.748805	0.832046	0.484407	-1.01519	0.712334	0.369253
YNL051W	COG5	4	-0.0540338	0.629154	0.905698	1.30701	1.00372	0.353118	1.39494	1.21986	0.475136
YNL052W	COX5A	4	-0.025933	0.27166	0.89383	-0.192378	0.560573	0.799658	-0.154958	0.543924	0.862931
YNL053W	MSG5	4	0.82376	0.214667	0.0255899	0.283148	0.841507	0.801496	0.0547491	0.801689	0.964702
YNL056W	OCA2	4	2.2951	0.883005	0.0488721	0.0525562	0.697026	0.961624	-0.66516	0.523114	0.422162
YNL065W	AQR1	4	2.73049	1.05099	0.0488928	0.842965	1.1522	0.575025	0.0040962	0.989859	0.999016
YNL066W	SUN4	4	0.36829	0.166423	0.0648741	-0.217696	0.996493	0.873048	-0.310377	1.01044	0.854065
YNL067W	RPL9B	4	2.24075	0.175277	0.00376509	0.324505	0.509858	0.631006	-0.367881	0.543057	0.677161
YNL067W-B	YNL067W-B	4	0.253713	0.752607	0.633385	-0.167919	0.122622	0.333621	-0.221619	0.31187	0.663823
YNL068C	FKH2	4	-1.00318	0.467403	0.067839	-0.75911	0.558299	0.334731	-0.416515	0.694532	0.72079
YNL072W	RNH201	4	0.0355743	0.560134	0.931636	-0.581648	1.78724	0.809991	-0.575137	1.98517	0.861394
YNL074C	MLF3	4	-0.399611	0.528155	0.325312	-0.422598	1.17368	0.790256	-0.268857	1.36062	0.901802
YNL078W	NIS1	4	-0.269366	0.804529	0.635565	0.530223	1.01166	0.694415	0.667447	1.1571	0.728024
YNL082W	PMS1	4	0.0343009	0.826948	0.954637	0.599699	1.00447	0.653328	0.639158	1.15372	0.736181
YNL083W	SAL1	4	0.404951	0.199274	0.074445	0.379469	1.06696	0.792787	0.291197	1.15428	0.876952
YNL085W	MKT1	4	1.17039	0.381121	0.0374306	0.636441	0.640633	0.447878	0.303988	0.675405	0.780553
YNL086W	SNN1	4	-0.622427	0.508917	0.168497	-0.626186	0.857973	0.575459	-0.404911	0.715138	0.729448
YNL087W	TCB2	4	-0.0670846	0.456521	0.837005	-0.120897	1.13488	0.941686	-0.0680005	1.2663	0.97253
YNL089C	YNL089C	4	1.19725	0.998911	0.173903	-0.304626	1.1485	0.846268	-0.671809	0.872301	0.638746
YNL090W	RHO2	4	1.19642	0.377557	0.0354965	-0.322257	0.573921	0.668991	-0.689653	0.588298	0.463517
YNL091W	NST1	4	-5.01445	0.612219	0.00747589	-1.22494	0.827682	0.307177	0.421534	0.669727	0.707002
YNL093W	YPT53	4	0.525095	1.04039	0.484301	0.420315	0.220912	0.225075	0.29373	0.354119	0.610815
YNL095C	YNL095C	4	-0.131882	0.461448	0.683522	-0.313	1.1759	0.845375	-0.244123	1.2052	0.899621
YNL096C	RPS7B	4	-2.64585	0.516227	0.0161487	-0.963094	0.874049	0.411295	-0.0869062	0.862615	0.954383
YNL099C	OCA1	4	-0.651944	0.619829	0.209825	-0.44839	0.935546	0.718201	-0.212531	1.04664	0.899621
YNL100W	MIC27	4	1.44411	0.887192	0.107021	0.25788	0.253684	0.44081	-0.174845	0.0959413	0.279626
YNL104C	LEU4	3	-10.041	0.153466	0.00299195	-1.80181	1.39564	0.468236	1.47874	1.38371	0.623214
YNL105W	RRT16	4	-1.28528	0.453516	0.0425698	-0.760373	0.64759	0.38764	-0.325211	0.72979	0.782388
YNL106C	INP52	4	1.19241	0.516953	0.0603454	0.267559	0.814497	0.808051	-0.082279	0.763915	0.95035
YNL107W	YAF9	4	0.323063	0.83623	0.58569	2.05372	0.463148	0.0639638	2.03843	0.696623	0.129713
YNL109W	YNL109W	4	-0.000813208	1.02926	0.999071	-0.488176	0.557382	0.495787	-0.467146	0.3808	0.441284
YNL111C	CYB5	4	0.703009	0.304984	0.0603758	0.047135	0.366868	0.928854	-0.148126	0.424681	0.827561
YNL115C	YNL115C	4	-0.064582	0.199176	0.645005	0.0304492	0.967002	0.98517	0.0866914	0.99173	0.959025
YNL121C	TOM70	4	-0.233702	0.184451	0.160012	-0.293364	1.57858	0.893412	-0.190524	1.5777	0.944137
YNL125C	ESBP6	4	-0.112311	1.00636	0.875762	0.285491	0.878787	0.81004	0.364423	0.655032	0.735723
YNL130C	CPT1	4	0.0500925	0.559795	0.90076	-0.272938	1.24186	0.873048	-0.262692	1.23784	0.896056
YNL140C	YNL140C	4	-4.87591	0.283109	0.00248969	-0.303318	1.25528	0.859483	1.32306	1.27506	0.516899
YNL142W	MEP2	4	-0.318965	0.16389	0.079455	-0.0476766	0.563029	0.955793	0.0899157	0.544295	0.916477
YNL315C	ATP11	4	-3.52368	1.9129	0.0874878	4.27635	0.446399	0.0162964	5.58495	0.318308	0.00648228
YNR033W	ABZ1	4	-0.0173561	0.361988	0.948382	0.203284	0.901381	0.871438	0.248784	0.829118	0.856657
YNR055C	HOL1	4	0.177495	0.893593	0.779118	-0.00506776	0.520259	0.994759	-0.0292654	0.505469	0.971187
YNR069C	BSC5	4	0.485979	0.7024	0.360507	0.266715	0.674811	0.769399	0.14874	0.824762	0.906521
YOL077W-A	ATP19	4	0.147395	0.641409	0.744148	0.318235	1.14252	0.835503	0.312819	1.05556	0.857257
YOL125W	TRM13	4	0.32555	0.547951	0.421621	0.0135425	0.551237	0.988032	-0.0587419	0.732294	0.960144
YOL147C	PEX11	4	0.221343	0.247549	0.26186	0.249013	0.826984	0.822969	0.217418	0.775943	0.864626
YOL151W	GRE2	8	0.131785	0.561773	0.613808	-0.319932	1.1596	0.752872	-0.337795	1.16021	0.781492
YOL152W	FRE7	8	0.466552	1.09591	0.368092	0.297472	1.12033	0.764386	0.186722	1.00998	0.864987
YOL153C	YOL153C	4	0.362459	0.763065	0.50877	-0.566345	0.209968	0.134992	-0.666713	0.436809	0.344521
YOL155C	HPF1	4	0.870381	0.332646	0.0485412	-0.900459	0.220114	0.070261	-1.17675	0.309221	0.0788352
YOL166C	YOL166C	4	-0.178931	0.166646	0.20367	-0.237293	0.673989	0.79436	-0.150888	0.697965	0.895325
YOR267C	HRK1	4	0.375372	0.334392	0.191491	-0.0965497	1.34546	0.963836	-0.18822	1.39694	0.936161
YOR268C	YOR268C	4	-0.102905	0.774006	0.853131	0.508355	0.327239	0.290037	0.590336	0.562346	0.513531
YOR269W	PAC1	4	-0.407599	0.691194	0.423903	1.77267	0.568061	0.110376	1.98948	0.380666	0.0419023
YOR273C	TPO4	4	1.11607	0.675486	0.10457	0.139072	1.35642	0.943853	-0.189246	1.29578	0.927869
YOR275C	RIM20	4	-4.11883	1.28134	0.034572	-1.17928	1.10835	0.424357	0.174459	0.914092	0.902441
YOR293C-A	YOR293C-A	4	-0.411891	0.711453	0.43121	-1.13016	1.4056	0.536197	-0.991874	1.33527	0.647657
YPL004C	LSP1	4	-0.733312	0.305922	0.056468	-0.194239	0.969456	0.883545	0.0753279	1.07021	0.964588
YPL027W	SMA1	4	1.86272	0.988506	0.084008	0.229711	0.843686	0.840247	-0.341198	1.1006	0.85358
YPL034W	YPL034W	4	0.426027	0.323571	0.151971	0.0191585	0.634955	0.986585	-0.0859531	0.718785	0.944137
YPL036W	PMA2	4	0.30159	0.168557	0.0917491	0.44878	0.915763	0.710174	0.396344	0.927633	0.790682
YPL078C	ATP4	4	-7.45449	0.948286	0.0081603	1.54558	0.709703	0.186306	4.06928	1.02791	0.0747064
YPL137C	GIP3	4	0.722835	0.705296	0.216988	-0.22517	0.723045	0.818489	-0.434436	0.519266	0.608133
YPL158C	AIM44	3	6.17042	0.295037	0.00958465	12.03	0.545331	0.0235557	10.37	0.642147	0.0316942
YPL183W-A	RTC6	4	0.715992	0.453215	0.111344	2.60342	0.853237	0.115453	2.47429	0.783848	0.114041
YPL194W	DDC1	4	0.222948	0.660996	0.633326	0.0188283	0.314653	0.973136	-0.0196313	0.120283	0.917045
YPR007C	REC8	4	1.58661	0.801511	0.0771552	0.287475	0.335709	0.508341	-0.191212	0.327517	0.724292
YPR008W	HAA1	4	-0.170805	0.382219	0.532137	-0.261011	0.635177	0.761017	-0.177926	0.724117	0.88041
YPR011C	YPR011C	4	-1.12834	0.37916	0.0390677	-1.09904	0.805434	0.334643	-0.724715	0.898728	0.623214
YPR013C	CMR3	4	-0.704285	0.0349532	0.00214601	0.268919	0.475553	0.667445	0.541711	0.484266	0.486092
YPR021C	AGC1	4	-0.688119	0.182496	0.0262703	-0.213623	1.05564	0.881898	0.0405754	1.06926	0.98072
YPR022C	YPR022C	4	-1.0136	0.368967	0.0450286	-1.20173	1.05985	0.403225	-0.867903	1.08417	0.623711
YPR023C	EAF3	4	-0.345129	0.375402	0.252557	0.0238912	0.449122	0.976284	0.172042	0.353607	0.768383
YPR026W	ATH1	4	0.616787	0.597326	0.214621	0.458313	0.285003	0.278135	0.302677	0.481856	0.707002
YPR037C	ERV2	4	1.61487	0.507754	0.0353991	0.790373	0.642598	0.370377	0.31626	0.7068	0.781492
YPR050C	YPR050C	4	-1.99142	0.481417	0.0223001	0.685554	0.640429	0.421676	1.39232	0.509034	0.145587
YPR064W	YPR064W	4	-1.44389	0.161574	0.0064926	0.235936	0.538791	0.744237	0.750594	0.526855	0.369253
YPR091C	NVJ2	4	0.486402	0.90103	0.458682	-0.286351	0.257418	0.406693	-0.419693	0.381919	0.492283
YPR118W	MRI1	4	0.644439	0.378786	0.0998341	0.45535	0.907822	0.708009	0.290555	1.00647	0.861394
YAL002W	VPS8	4	-4.09276	0.0394968	0.000412286	0.58253	0.499672	0.390207	1.70493	0.487848	0.0928392
YAL007C	ERP2	4	1.91061	0.991107	0.0806537	0.499056	0.709853	0.592125	-0.0502763	0.971718	0.97294
YAL008W	FUN14	4	-0.361651	0.204974	0.0938817	0.13979	1.06076	0.925764	0.229163	1.06132	0.895325
YAL009W	SPO7	4	0.581489	0.213975	0.0457267	1.95278	0.64406	0.117024	1.75167	0.62777	0.139692
YAL014C	SYN8	4	-0.0244138	0.205404	0.867524	0.0287002	1.57038	0.991804	0.0257877	1.58535	0.993636
YAL015C	NTG1	4	-0.103063	0.312027	0.639577	-1.05696	0.358347	0.119256	-1.0214	0.404186	0.168381
YAL017W	PSK1	4	0.736144	0.278241	0.047899	0.682203	1.22947	0.673284	0.457372	1.15948	0.810792
YAL018C	LDS1	4	-1.1364	0.0615472	0.00223798	-0.210545	0.856397	0.857329	0.100078	0.846115	0.945045
YAL020C	ATS1	4	-0.883698	0.427072	0.0723494	-0.873027	0.615505	0.319367	-0.622722	0.591445	0.513531
YAL021C	CCR4	1	-5.47633	NA	NA	4.52298	NA	NA	5.97085	NA	NA
YAL027W	SAW1	4	0.877098	0.95108	0.252123	-0.502274	0.694225	0.578208	-0.748319	0.873695	0.598718
YAL029C	MYO4	4	0.715214	0.533986	0.147259	0.785301	0.98056	0.53841	0.564731	0.96024	0.723048
YAL030W	SNC1	4	-0.844982	0.334865	0.051609	-1.37537	0.483188	0.124321	-1.1282	0.546304	0.23477
YAL031C	GIP4	4	0.0199568	0.278751	0.922217	-0.533844	0.917136	0.657666	-0.540541	0.860045	0.707002
YAL036C	RBG1	4	0.0603241	0.294024	0.771289	0.602261	0.870414	0.598356	0.566986	0.936412	0.719099
YAL037W	YAL037W	4	-0.0280886	0.390931	0.922054	0.324917	0.856157	0.777733	0.318511	0.841431	0.818947
YAL039C	CYC3	4	-3.36378	0.334796	0.00549502	5.7893	0.332436	0.00829559	6.62913	0.402084	0.00702021
YAL040C	CLN3	4	-0.767768	0.315514	0.0549514	-0.501674	0.319387	0.286217	-0.289341	0.303515	0.555611
YAL042W	ERV46	4	-0.725068	0.908689	0.303597	0.765121	0.496261	0.293749	0.946233	0.5822	0.316762
YAL043C-A	YAL043C-A	4	-0.0800845	0.538191	0.835094	0.310804	0.652389	0.719054	0.319103	0.673243	0.771662
YAL045C	YAL045C	4	3.30245	0.599953	0.0144471	1.60752	0.944629	0.258363	0.6534	0.771344	0.603721
YAL048C	GEM1	4	-4.08866	0.418288	0.00571723	0.403655	0.434733	0.473276	1.52764	0.537934	0.134537
YAL049C	AIM2	4	-1.13809	0.814985	0.13726	-0.630718	0.810323	0.550926	-0.313216	0.641431	0.768227
YAL051W	OAF1	4	-0.98912	0.294294	0.0322116	-0.597543	0.784893	0.559093	-0.322062	0.827191	0.810792
YAL053W	FLC2	4	0.453732	0.300876	0.120065	0.46385	0.967051	0.718118	0.321052	0.975329	0.84137
YAL055W	PEX22	4	-1.4193	0.432272	0.0334377	-0.862791	1.31789	0.619223	-0.463382	1.3049	0.826016
YAL056W	GPB2	4	2.29805	0.555193	0.0223001	1.28392	0.740916	0.251398	0.614641	0.84209	0.650901
YAL059W	ECM1	4	0.866598	0.134246	0.0110811	-0.172708	0.775949	0.872456	-0.420853	0.749313	0.73296
YAL060W	BDH1	4	-0.480279	0.401864	0.174676	-1.25003	0.723332	0.252354	-1.1064	0.662487	0.308773
YAL061W	BDH2	4	-0.604286	0.420165	0.130503	-0.544867	0.707212	0.554615	-0.377434	0.634689	0.722657
YAL062W	GDH3	4	-0.775724	0.489442	0.110979	-0.622417	1.28802	0.715631	-0.406025	1.17658	0.82807
YAL065C	YAL065C	4	-0.120383	0.215983	0.446282	-0.599471	0.649579	0.476594	-0.566058	0.65855	0.598529
YAL066W	YAL066W	4	1.53067	0.608513	0.0517865	0.391922	0.766773	0.703256	-0.0498975	0.731393	0.964702
YAL067C	SEO1	4	-0.368798	0.494552	0.331781	-0.674655	0.832265	0.532791	-0.570867	0.694202	0.615789
YAR003W	SWD1	4	0.675362	0.404888	0.103181	2.16315	0.496091	0.0652512	1.93267	0.417727	0.0537131
YAR014C	BUD14	4	-1.66518	0.844728	0.0775674	-0.299491	1.18776	0.854946	0.159847	1.04234	0.922794
YAR023C	YAR023C	4	0.136036	0.520303	0.710126	-0.756829	1.51936	0.709992	-0.792474	1.42774	0.735982
YAR027W	UIP3	4	-0.493663	0.223148	0.0648741	0.000916781	0.592175	0.999748	0.129197	0.58044	0.893177
YAR028W	YAR028W	4	-0.694565	0.378111	0.0879083	-0.499374	0.678178	0.572805	-0.307476	0.59735	0.759052
YAR031W	PRM9	4	-0.409313	0.890834	0.521345	-0.0679935	0.69468	0.947053	0.0378316	0.445017	0.959027
YAR035W	YAT1	4	0.0436031	0.379396	0.872304	0.514915	0.10011	0.0471027	0.485632	0.188001	0.161471
YAR037W	YAR037W	4	1.51663	1.02566	0.124609	-0.23142	1.35584	0.902045	-0.65982	1.36903	0.768383
YAR040C	YAR040C	4	0.428162	0.200261	0.0683482	-0.284683	0.473191	0.652167	-0.408938	0.431424	0.555611
YAR042W	SWH1	8	0.353507	0.848572	0.378337	0.226094	0.612371	0.659686	0.114853	0.59834	0.861394
YAR043C	YAR043C	4	0.545476	0.816801	0.374906	0.0528815	0.481698	0.940198	-0.109215	0.590304	0.904996
YAR044W	YAR044W	4	-0.512955	0.441745	0.182368	-0.0520371	0.709972	0.962768	0.0824271	0.741586	0.948707
YAR047C	YAR047C	4	0.522724	0.590382	0.26545	0.356331	1.26582	0.834031	0.195946	1.31222	0.925555
YBL007C	SLA1	4	1.97456	0.771073	0.0501444	7.62771	0.656547	0.0123211	6.95183	0.595309	0.0104248
YBL008W	HIR1	4	-1.44245	0.231382	0.0115755	-0.583106	0.595836	0.453254	-0.181512	0.648106	0.864626
YBL009W	ALK2	4	-0.109548	0.293663	0.5975	-0.32633	0.81952	0.768339	-0.300102	0.754242	0.80951
YBL012C	YBL012C	4	1.73074	0.76068	0.0617913	0.453201	1.19286	0.777733	-0.0453084	0.971101	0.975242
YBL013W	FMT1	4	0.569074	0.465197	0.168497	0.283365	0.483178	0.65765	0.111177	0.591563	0.903267
YBL015W	ACH1	4	-1.05487	0.505747	0.0715768	-1.0829	0.878205	0.370377	-0.78169	0.814968	0.553157
YBL016W	FUS3	2	-1.89621	0.154024	0.0907644	-0.446428	1.55171	0.90111	0.0795325	1.57096	0.985669
YBL017C	PEP1	4	-1.55704	0.817749	0.0824755	0.558618	0.653098	0.508342	0.97473	0.523847	0.271106
YBL019W	APN2	4	-0.464716	0.577038	0.300011	0.0880856	0.528103	0.903618	0.20697	0.575431	0.823838
YBL024W	NCL1	4	-0.528918	0.428351	0.166464	-0.307338	0.82706	0.781154	-0.164531	0.773673	0.896056
YBL029W	YBL029W	4	0.694807	0.505145	0.140788	0.292587	1.09692	0.845122	0.0852195	1.0481	0.960126
YBL032W	HEK2	4	-0.191088	0.511701	0.597175	-1.25543	0.563506	0.181691	-1.1923	0.463984	0.162507
YBL036C	YBL036C	4	0.0232034	0.609237	0.958554	-0.431728	0.977744	0.74288	-0.440888	0.831178	0.753702
YBL037W	APL3	4	-0.443278	0.510778	0.272609	-0.389493	0.546078	0.586229	-0.269299	0.538556	0.766205
YBL039C	URA7	4	-1.21848	0.511043	0.0569595	-0.521911	0.482329	0.418066	-0.183666	0.342197	0.749927
YBL042C	FUI1	4	-1.1035	0.626849	0.094207	-1.03247	0.75764	0.334731	-0.71848	0.691499	0.516899
YBL043W	ECM13	4	0.209902	0.265025	0.306084	-0.280739	0.761927	0.783416	-0.34423	0.810141	0.792486
YBL044W	YBL044W	4	0.406111	0.25997	0.113385	0.192455	0.32064	0.652855	0.0670676	0.358273	0.903903
YBL045C	COR1	4	-5.21786	0.313358	0.00258735	4.91125	0.652035	0.0224845	6.28116	0.63503	0.0130615
YBL048W	RRT1	4	0.798256	0.834057	0.239472	-0.495912	0.64688	0.556397	-0.720082	0.461192	0.337795
YBL049W	MOH1	4	0.856746	0.540431	0.11097	0.877509	0.615904	0.319299	0.616091	0.692197	0.582048
YBL051C	PIN4	4	-3.86823	0.876504	0.0202621	-0.26917	1.21885	0.872533	0.803644	1.07143	0.644769
YBL052C	SAS3	4	1.06502	0.397206	0.046886	0.0146013	0.445277	0.984547	-0.291695	0.461428	0.706177
YBL053W	YBL053W	4	0.850582	0.385476	0.0650901	-0.385397	0.533432	0.578803	-0.625835	0.602412	0.516899
YBL054W	TOD6	4	2.55594	1.04376	0.0544336	0.74058	0.874963	0.512843	0.00772352	0.600712	0.995131
YBL055C	YBL055C	4	-0.449685	0.226631	0.0769198	-0.645961	0.947703	0.606198	-0.520069	0.953859	0.742622
YBL057C	PTH2	4	-0.750529	0.335974	0.0638285	-0.144859	0.569729	0.85428	0.0572275	0.49573	0.947867
YBL060W	YEL1	4	-0.638089	0.446851	0.132024	-0.253826	0.575629	0.742888	-0.0814123	0.67877	0.944137
YBL061C	SKT5	4	0.339286	0.261515	0.154638	1.38437	0.963613	0.316025	1.25942	0.88776	0.371129
YBL062W	YBL062W	4	0.226238	0.648712	0.62045	0.9779	0.590451	0.268916	0.890659	0.610683	0.360515
YBL063W	KIP1	4	-0.0963766	0.200749	0.504361	-0.415849	0.963679	0.7475	-0.391926	0.917673	0.790682
YBL064C	PRX1	4	0.676765	1.48872	0.525666	0.376272	0.812179	0.727943	0.172656	0.82923	0.896793
YBL066C	SEF1	4	0.667109	0.959426	0.358834	0.186092	1.02514	0.895836	-0.0119324	0.943674	0.995131
YBL067C	UBP13	4	0.497866	0.789425	0.396358	0.820312	0.781741	0.428118	0.659777	0.577739	0.475136
YBL068W	PRS4	4	1.80615	1.38385	0.15368	0.217465	1.06017	0.880897	-0.298463	0.807534	0.820667
YBL070C	YBL070C	4	-0.493237	0.469556	0.210069	-0.359112	0.803064	0.739892	-0.225459	0.883714	0.876812
YBL071C	YBL071C	3	0.88007	0.395263	0.126628	0.30489	1.80133	0.921222	0.0457056	1.82955	0.991676
YBL078C	ATG8	4	-0.726768	0.586797	0.165827	-0.401586	1.04796	0.776029	-0.202205	1.09644	0.905685
YBL081W	YBL081W	4	-2.75035	0.626019	0.0204981	-1.90523	1.21173	0.285889	-1.11898	1.07183	0.515509
YBL082C	ALG3	4	1.27235	0.530192	0.0563361	0.871168	0.590402	0.307484	0.494028	0.621909	0.626908
YBL083C	YBL083C	4	0.70193	0.76749	0.254323	0.592345	0.622534	0.466574	0.37842	0.826369	0.778047
YBL085W	BOI1	4	-0.0844515	0.369336	0.744239	-0.131991	0.396447	0.805465	-0.115721	0.376981	0.854065
YBL088C	TEL1	4	-0.441493	0.807145	0.453739	-0.0167192	0.49801	0.984073	0.0972915	0.663194	0.927698
YBL089W	AVT5	4	0.626509	0.803399	0.312624	-0.71917	0.506878	0.319367	-0.892073	0.347104	0.162507
YBL091C-A	SCS22	4	-0.330925	0.596843	0.448649	-0.125223	0.072614	0.252966	-0.0403704	0.222143	0.906346
YBL092W	RPL32	4	-0.0313588	0.504612	0.932992	0.313215	0.436091	0.582628	0.307898	0.50085	0.714654
YBL094C	YBL094C	4	1.07349	0.150293	0.00955044	0.39925	0.37412	0.42283	0.0847243	0.375665	0.891142
YBL095W	YBL095W	4	0.61905	0.319123	0.0798784	0.388629	0.666237	0.65765	0.200908	0.663132	0.854893
YBL096C	YBL096C	4	0.668767	0.35151	0.0825932	-0.102201	1.18294	0.955771	-0.296291	1.13327	0.874847
YBL099W	ATP1	4	-5.45236	0.505432	0.00486815	3.45483	0.388994	0.0186049	4.91231	0.390096	0.0100914
YBL100C	YBL100C	4	-6.68054	0.367358	0.00231466	3.38145	0.432716	0.0211217	5.18231	0.511854	0.0129747
YBL101C	ECM21	4	0.709855	0.758005	0.247047	-0.290148	1.12396	0.851579	-0.492821	1.17968	0.795612
YBL102W	SFT2	4	-0.333137	0.508536	0.382257	-0.107433	0.627385	0.901393	-0.0222352	0.551976	0.978676
YBL104C	SEA4	4	-0.499428	1.18997	0.554614	-0.340844	1.21631	0.835092	-0.205744	1.13999	0.906521
YBL106C	SRO77	4	0.35079	0.39948	0.268235	0.803954	0.61434	0.351719	0.684656	0.692464	0.537707
YBL107C	MIX23	4	-0.741692	0.280621	0.0479122	-0.17806	0.602625	0.826714	0.0220705	0.604876	0.981539
YBR001C	NTH2	4	1.9122	0.499411	0.0256251	0.309026	0.622895	0.709992	-0.237851	0.568541	0.79544
YBR003W	COQ1	4	-4.90619	0.654566	0.00887295	4.30227	1.03909	0.069687	5.59461	0.97433	0.0342036
YBR005W	RCR1	4	-0.134965	0.820299	0.8179	-0.835913	0.651599	0.358115	-0.79483	0.716085	0.488577
YBR006W	UGA2	4	-1.07486	0.430568	0.0523798	-0.996913	1.0843	0.477748	-0.691446	1.01291	0.674932
YBR007C	DSF2	4	-0.832643	0.512294	0.107354	-0.602874	0.426266	0.320812	-0.370918	0.283755	0.407246
YBR010W	HHT1	4	1.00881	0.3369	0.0386521	1.04392	0.646506	0.276415	0.737585	0.641894	0.473964
YBR012C	YBR012C	4	0.444931	0.354366	0.162242	0.236803	1.09131	0.873229	0.0999203	1.09796	0.956806
YBR013C	YBR013C	4	0.71027	0.659472	0.202879	0.25178	0.894971	0.834031	0.0407251	0.802631	0.973474
YBR014C	GRX7	4	0.0529033	0.693648	0.916775	-0.387035	0.566624	0.604789	-0.405153	0.693215	0.724292
YBR016W	YBR016W	4	0.165053	0.510268	0.645179	-0.695329	1.36379	0.703256	-0.739998	1.23113	0.720281
YBR020W	GAL1	4	-0.112805	0.508209	0.752171	-0.0830755	1.11649	0.962279	-0.0596504	1.14026	0.97294
YBR022W	POA1	4	0.117597	0.363909	0.64535	-0.0791566	1.6437	0.978775	-0.119999	1.69988	0.964588
YBR023C	CHS3	4	0.841344	0.796168	0.208206	2.57906	0.607084	0.0679069	2.29598	0.583884	0.0756795
YBR024W	SCO2	4	-0.0386173	0.526178	0.920412	-0.536128	1.06169	0.70591	-0.526468	1.03269	0.763465
YBR025C	OLA1	4	-2.1085	0.933066	0.0624878	-1.04535	0.749137	0.327612	-0.451088	0.986256	0.778047
YBR027C	YBR027C	4	-0.081969	0.858871	0.89383	0.0363856	0.530069	0.965449	0.0493953	0.65462	0.962582
YBR028C	YPK3	4	-0.264561	0.608832	0.542079	-0.201602	0.92052	0.873048	-0.134078	0.947437	0.931723
YBR033W	EDS1	4	0.457964	0.416837	0.196965	-0.516473	0.802987	0.628204	-0.645498	0.844398	0.640561
YBR034C	HMT1	4	-1.25133	0.232555	0.0150109	0.0206025	0.753445	0.987298	0.359729	0.720395	0.766205
YBR037C	SCO1	4	-4.69239	0.402686	0.00434371	4.94229	0.761359	0.0307723	6.16529	0.751779	0.0175427
YBR041W	FAT1	4	1.18405	0.645324	0.0880966	0.609912	0.671126	0.480949	0.261364	0.705712	0.820667
YBR044C	TCM62	4	-0.18667	0.703059	0.705472	0.864267	0.711609	0.376084	0.893827	0.879307	0.526586
YBR045C	GIP1	4	-0.562402	0.58709	0.239237	-0.40015	1.03813	0.77481	-0.246596	0.99803	0.878924
YBR046C	ZTA1	4	0.0756501	0.467372	0.820391	-0.879292	0.632393	0.328598	-0.896241	0.546062	0.313081
YBR047W	FMP23	4	0.211984	0.572472	0.59989	-0.122042	1.27571	0.949582	-0.188534	1.29071	0.927869
YBR050C	REG2	4	0.551603	0.870458	0.39481	0.505679	0.812397	0.639424	0.334968	0.845659	0.810613
YBR051W	YBR051W	4	0.810501	0.649428	0.163915	0.277609	0.751454	0.783289	0.0382285	0.687303	0.971187
YBR052C	RFS1	4	0.444023	0.425501	0.211952	0.089063	0.589882	0.914073	-0.0453127	0.698214	0.967016
YBR053C	YBR053C	4	0.71982	1.05851	0.367488	-0.0728614	0.857818	0.955793	-0.281626	0.675903	0.796187
YBR056W	YBR056W	4	-0.874058	0.435267	0.0757331	-0.287711	0.686031	0.755596	-0.0490212	0.713851	0.964702
YBR058C	UBP14	4	-0.360381	0.574599	0.398798	0.493478	1.0723	0.729175	0.577103	0.935157	0.711846
YBR059C	AKL1	4	0.789756	0.580922	0.143425	-0.175069	0.887459	0.884699	-0.401765	0.895973	0.78139
YBR062C	YBR062C	8	-0.326256	0.575763	0.241086	-0.280257	0.776098	0.667445	-0.194341	0.691491	0.7906
YBR063C	YBR063C	4	0.496921	1.28285	0.584613	0.0719321	0.391077	0.894013	-0.0769238	0.573457	0.936161
YBR064W	YBR064W	4	-0.203713	0.554811	0.602917	-1.16982	0.994015	0.386437	-1.10449	1.09741	0.532595
YBR068C	BAP2	4	0.630676	0.236887	0.0474081	-0.0881629	0.486352	0.895836	-0.271851	0.491448	0.736213
YBR069C	TAT1	4	0.702074	0.535758	0.152706	0.0295952	0.783135	0.982461	-0.175787	0.689879	0.876812
YBR071W	YBR071W	4	0.999233	0.279127	0.0286694	-0.0161151	1.00942	0.993049	-0.303611	0.936125	0.84452
YBR072W	HSP26	4	-0.273163	0.39888	0.364613	0.0549601	1.03523	0.976284	0.120968	0.968766	0.941403
YBR074W	PFF1	8	0.747821	1.04803	0.157914	-0.00917725	0.868062	0.993049	-0.226716	0.771726	0.780553
YBR075W	YBR075W	4	0.0144871	1.36397	0.98829	-0.0229354	0.809692	0.987298	-0.0359011	1.00173	0.982288
YBR076W	ECM8	4	-0.041852	0.182076	0.744148	-0.192943	0.84882	0.87061	-0.187615	0.861639	0.894963
YBR098W	MMS4	4	-0.275939	0.260443	0.20736	-0.0169902	0.773828	0.98955	0.0508887	0.806623	0.967739
YBR105C	VID24	4	-0.634308	0.312026	0.074445	0.269378	0.612392	0.742888	0.432758	0.546789	0.628209
YBR157C	ICS2	4	1.52483	0.237912	0.0111842	0.837706	0.883142	0.466987	0.390714	0.901016	0.789502
YBR201W	DER1	4	-0.267469	0.410014	0.383597	-0.273405	0.989655	0.836597	-0.203975	0.967508	0.896056
YBR230W-A	YBR230W-A	4	0.511778	0.679163	0.327181	-0.21531	0.982824	0.873048	-0.363925	1.04339	0.827561
YBR274W	CHK1	4	-0.499334	0.232565	0.067839	-0.225981	0.659646	0.800084	-0.0926595	0.611428	0.922988
YCL002C	YCL002C	3	0.262316	0.455022	0.518961	-0.962659	0.559804	0.381305	-1.03036	0.634723	0.475136
YCL012C	YCL012C	2	0.983786	1.42895	0.59656	-0.764513	1.99302	0.871463	-1.03629	1.5644	0.821763
YCL026C-B	HBN1	4	0.1113	0.706614	0.825557	0.451799	0.528133	0.508342	0.404613	0.427926	0.555611
YCL061C	MRC1	4	-1.07393	0.78826	0.142984	-0.686698	0.903585	0.559093	-0.386223	0.781444	0.766205
YCR061W	YCR061W	4	-0.669808	0.518089	0.155252	-0.305231	0.32502	0.469345	-0.123193	0.406974	0.854893
YCR095W-A	YCR095W-A	4	-0.0739231	0.470305	0.825838	0.151447	0.984107	0.913023	0.160459	0.879198	0.905784
YDL026W	YDL026W	4	0.0861523	0.133072	0.386302	0.197094	0.892209	0.872533	0.160801	0.914822	0.910201
YDL069C	CBS1	4	-2.32629	0.989497	0.0583277	4.81511	0.638752	0.0224845	5.38067	0.447165	0.0104248
YDR090C	YDR090C	4	-0.0672345	0.798583	0.907569	-0.151123	1.06294	0.92038	-0.139359	0.915787	0.922905
YDR092W	UBC13	4	-2.06174	0.797546	0.0492864	-0.922608	0.626458	0.307945	-0.343254	0.706705	0.768383
YDR147W	EKI1	4	1.51468	0.470169	0.034529	0.150647	0.655868	0.869276	-0.283037	0.747264	0.818925
YDR179W-A	YDR179W-A	4	0.258173	0.251579	0.216683	0.748799	0.408589	0.234825	0.656152	0.380771	0.30087
YDR318W	MCM21	4	0.84118	0.466026	0.0907644	0.0579672	0.811237	0.963836	-0.186613	0.74556	0.876952
YDR475C	JIP4	4	-0.399123	0.5021	0.304936	-1.10235	0.640102	0.253474	-0.983588	0.576869	0.303379
YDR485C	VPS72	4	0.811606	0.471171	0.0975863	0.939018	0.405924	0.171241	0.689241	0.36375	0.26575
YDR501W	PLM2	4	-0.180089	0.33797	0.464144	-0.28772	0.63084	0.732586	-0.242424	0.558269	0.789149
YER007W	PAC2	4	0.155116	0.333139	0.516557	0.238374	0.824991	0.830983	0.182232	0.790146	0.890025
YER076C	YER076C	4	0.0112002	0.380107	0.968286	-0.293994	0.788147	0.781113	-0.301909	0.834849	0.821763
YER099C	PRS2	4	0.515175	0.294449	0.0951956	0.189171	0.69576	0.840343	0.0334395	0.743213	0.976322
YER105C	NUP157	4	0.6288	0.200328	0.0359159	-0.188491	1.16055	0.906243	-0.370126	1.09098	0.833526
YER109C	FLO8	4	0.183844	0.839332	0.755369	0.364094	1.5607	0.86546	0.298029	1.52421	0.901868
YER155C	BEM2	4	3.72456	0.741385	0.0164856	6.68135	0.391643	0.00850807	5.53221	0.519225	0.0116976
YFL010W-A	AUA1	4	0.566848	0.452559	0.162968	-0.0518109	0.745205	0.965277	-0.218267	0.691215	0.849465
YFL031W	HAC1	4	-0.142037	1.06007	0.852222	5.01506	0.491159	0.0149322	4.96887	0.467843	0.0116976
YFL042C	YFL042C	4	-0.753886	0.254817	0.0395263	-0.21544	0.348228	0.640842	-0.0113408	0.285145	0.978934
YFR038W	IRC5	4	0.819854	1.02055	0.301046	-0.430688	0.558447	0.554185	-0.661871	0.268197	0.175547
YFR045W	YFR045W	4	-0.166613	0.208421	0.303082	-0.0982683	0.953932	0.943327	-0.0596164	0.98764	0.969427
YGL023C	PIB2	4	-2.80316	0.122874	0.00181374	-1.59803	0.499356	0.105563	-0.801758	0.525037	0.344521
YGL033W	HOP2	4	0.659785	0.487275	0.144422	0.282083	0.643574	0.744121	0.084635	0.696144	0.944137
YGL045W	RIM8	4	-1.63866	0.555092	0.0396951	0.11021	0.492692	0.871655	0.555909	0.562823	0.538246
YGL101W	YGL101W	4	0.0256185	0.424496	0.934891	-0.428187	0.689984	0.640222	-0.438074	0.69054	0.705883
YGL104C	VPS73	4	-0.839874	0.283842	0.0395263	-0.419737	0.716535	0.65765	-0.188559	0.679765	0.864987
YGL178W	MPT5	4	-0.111188	0.311988	0.61369	0.0185086	0.807563	0.988771	0.0399336	0.767473	0.97294
YGL184C	STR3	4	0.160944	0.377944	0.550009	-0.0748811	0.650126	0.937398	-0.127869	0.738927	0.911371
YGL185C	YGL185C	4	-0.315154	0.610832	0.47574	0.423614	0.718001	0.656905	0.495701	0.621468	0.62488
YGL186C	TPN1	3	-9.07008	0.458603	0.0101753	0.499947	0.586266	0.616293	3.01067	0.600353	0.152005
YGL190C	CDC55	1	-2.8309	NA	NA	0.738661	NA	NA	1.50702	NA	NA
YGL191W	COX13	4	0.364998	0.446136	0.293833	0.480104	0.748934	0.629793	0.361786	0.749882	0.768383
YGL192W	IME4	3	-0.203028	0.520448	0.64952	0.558051	1.07731	0.756076	0.59684	0.989022	0.768383
YGL196W	DSD1	4	-0.0237693	0.402609	0.935866	0.257422	1.18656	0.873229	0.250841	1.23803	0.899621
YGL202W	ARO8	4	-1.692	0.355397	0.0177142	-0.349469	0.903567	0.773642	0.118104	0.9838	0.944137
YGL211W	NCS6	4	-2.79728	0.490879	0.0137077	-0.765047	1.10875	0.599493	0.0168836	1.08974	0.994557
YGL224C	SDT1	4	1.23057	1.01987	0.172204	0.401825	0.359515	0.405745	0.0434845	0.474018	0.956586
YGL237C	HAP2	4	-0.136131	0.587802	0.742567	1.80777	0.627222	0.122025	1.80885	0.682092	0.152197
YGR037C	ACB1	4	0.0243993	0.275207	0.901775	1.21125	0.347275	0.0894235	1.17669	0.382313	0.118859
YGR062C	COX18	3	-6.63969	0.0949259	0.00279599	3.16538	0.887048	0.200791	4.95815	0.878868	0.130975
YGR225W	AMA1	4	-0.185503	0.315472	0.42504	-0.00543475	0.727942	0.995927	0.0370655	0.708007	0.97294
YGR244C	LSC2	4	0.650811	0.724682	0.260348	0.404774	0.905138	0.739892	0.207955	0.802517	0.874847
YHL001W	RPL14B	4	-0.400761	0.36243	0.194911	-0.456556	0.827018	0.676119	-0.347187	0.767659	0.779966
YHR001W	OSH7	4	0.890491	0.239237	0.0267586	0.277229	1.05917	0.847551	0.0155627	1.10703	0.994843
YHR063C	PAN5	4	-0.236693	0.417645	0.43967	0.127851	0.47332	0.842013	0.182584	0.378566	0.768383
YHR071W	PCL5	4	-0.260756	0.557209	0.514451	-0.0598261	0.466833	0.929042	0.00447484	0.355363	0.995131
YHR141C	RPL42B	4	-1.43966	0.744918	0.0803311	-0.0401366	0.300383	0.925028	0.352398	0.49782	0.663823
YHR149C	SKG6	4	0.242089	0.185138	0.15338	-0.139041	1.34672	0.943327	-0.213663	1.34643	0.918934
YHR192W	LNP1	4	1.51674	0.670971	0.0624878	0.809166	0.540641	0.302848	0.364864	0.534024	0.674932
YIL041W	GVP36	4	-1.06014	0.806217	0.152206	-0.993593	1.11871	0.48964	-0.69228	0.913236	0.641228
YJL012C	VTC4	4	1.19885	0.580098	0.0723494	0.700461	0.867764	0.535166	0.346407	0.80019	0.789625
YJL020C	BBC1	4	0.146687	0.508693	0.68062	0.254511	1.01966	0.856096	0.200472	0.901018	0.893177
YJL059W	YHC3	4	0.200174	0.28041	0.348408	-0.0137794	0.918354	0.993049	-0.0786314	0.862361	0.956806
YJL160C	YJL160C	4	0.381535	0.185319	0.0729208	0.652237	1.1115	0.65765	0.526685	1.1366	0.776752
YJR060W	CBF1	4	-7.04188	0.253585	0.00154997	-1.93282	1.3475	0.316746	0.0497928	1.34327	0.981366
YJR112W-A	YJR112W-A	4	1.12004	0.649321	0.0975126	0.0460472	1.19076	0.981772	-0.276064	1.14166	0.881765
YJR143C	PMT4	4	-0.58335	0.176002	0.0329657	0.289036	0.777819	0.781154	0.437916	0.745569	0.723048
YJR151C	DAN4	4	-1.03137	0.470399	0.0658247	0.301184	0.575293	0.694415	0.57473	0.624601	0.566347
YKL002W	DID4	4	-3.34365	0.299805	0.00461484	-0.354344	0.841341	0.753194	0.573582	0.750738	0.640561
YKL033W-A	YKL033W-A	4	-0.435599	0.768255	0.439623	0.470204	0.434224	0.418066	0.575145	0.343447	0.308773
YKL065C	YET1	4	0.932209	0.192638	0.0174409	-0.346791	0.855733	0.764386	-0.610566	0.894279	0.674932
YKL157W	APE2	4	0.120668	0.437624	0.693711	0.516574	0.901719	0.661721	0.465789	0.772432	0.720281
YKL198C	PTK1	4	-0.233728	0.496695	0.512771	-0.127468	0.690469	0.893412	-0.0696674	0.640433	0.94912
YKL201C	MNN4	4	0.976064	0.442393	0.0650901	0.121628	1.36285	0.954176	-0.161512	1.33698	0.944137
YKR054C	DYN1	4	-0.688045	1.00214	0.363737	1.27352	0.946749	0.338115	1.43656	0.672349	0.22603
YKR091W	SRL3	4	0.865784	0.148956	0.0132546	0.368091	1.07919	0.800693	0.111924	1.06238	0.952102
YKR099C-A	YKR099C-A	4	-0.35004	0.315738	0.194332	-0.708676	0.847117	0.51825	-0.609597	0.796965	0.640561
YKR100C	SKG1	4	1.59837	0.824837	0.0799121	-0.505845	0.34365	0.307957	-0.952838	0.517407	0.273891
YLL006W-A	YLL006W-A	4	-0.0986116	0.328915	0.668183	0.140523	1.40907	0.945619	0.156583	1.37382	0.948313
YLR054C	OSW2	4	-0.212621	0.875721	0.730059	0.056956	1.62714	0.983849	0.106062	1.40047	0.962582
YLR118C	YLR118C	4	-0.55732	0.373348	0.122483	-0.973706	0.670727	0.310845	-0.812821	0.57568	0.373308
YLR125W	YLR125W	4	0.31048	0.308991	0.22351	0.0906767	0.756006	0.935415	-0.00650826	0.739661	0.995553
YLR194C	YLR194C	4	1.07399	0.34164	0.0359088	0.157281	0.119281	0.348791	-0.153692	0.190569	0.623214
YLR211C	ATG38	4	-0.207512	0.742381	0.689839	-0.673074	0.430513	0.288368	-0.614258	0.512813	0.453245
YLR285C-A	YLR285C-A	4	1.85373	1.04424	0.0930188	0.505688	0.88123	0.661721	-0.0278943	0.875909	0.985178
YLR307C-A	YLR307C-A	4	2.44184	0.32169	0.0087287	1.31357	0.801499	0.271169	0.603776	0.82226	0.649213
YLR329W	REC102	4	0.401419	0.694339	0.431603	0.485369	1.14818	0.752321	0.356822	1.04803	0.833194
YLR332W	MID2	4	0.128093	0.314914	0.56565	0.247976	0.537983	0.728925	0.199219	0.472175	0.7951
YLR406C-A	YLR406C-A	4	0.844072	0.165616	0.0162144	0.0151605	0.607485	0.988032	-0.229573	0.637461	0.823369
YLR419W	YLR419W	4	-0.273973	0.297431	0.252453	-0.694308	1.02444	0.609013	-0.616647	0.947458	0.69805
YLR445W	GMC2	4	1.86071	0.566675	0.0334377	0.156061	0.994072	0.911127	-0.374134	0.991071	0.81983
YML007C-A	YML007C-A	4	-2.46253	0.790628	0.0365773	0.0474809	0.896998	0.976284	0.723728	1.02279	0.663823
YML034W	SRC1	4	0.493123	1.86051	0.705926	0.95523	0.541313	0.246863	0.79396	0.184831	0.0637005
YML054C-A	YML054C-A	4	0.328865	0.571448	0.433198	0.193634	0.487098	0.768339	0.0897552	0.570107	0.919132
YML058W-A	HUG1	4	0.0878276	0.237478	0.600295	0.118281	1.3281	0.954226	0.0827232	1.34273	0.968984
YML104C	MDM1	4	-0.403897	0.398703	0.220991	-0.363749	0.961983	0.777733	-0.254922	1.02757	0.878406
YMR001C-A	YMR001C-A	4	-2.08692	0.22093	0.00590511	0.460167	0.363432	0.362561	1.02545	0.344725	0.126935
YMR194C-B	CMC4	4	0.0504385	0.253476	0.7788	0.7196	1.5112	0.7191	0.68529	1.47697	0.7763
YMR230W-A	YMR230W-A	4	-0.975092	0.242808	0.0237559	1.87212	0.455184	0.0700095	2.10602	0.446156	0.0515174
YMR247W-A	YMR247W-A	4	-0.311977	0.537042	0.430057	-0.27758	0.287283	0.457695	-0.195683	0.344705	0.728932
YMR272W-B	YMR272W-B	4	0.898875	0.311241	0.0410973	-0.2996	1.04019	0.831095	-0.554805	1.04145	0.75153
YMR315W-A	YMR315W-A	4	-0.0903283	0.306308	0.673836	-0.255558	0.653221	0.77155	-0.235766	0.578364	0.803284
YNL042W-B	YNL042W-B	4	-0.079303	0.460346	0.809815	-0.869349	0.420877	0.202904	-0.843267	0.447317	0.267226
YNL090W	RHO2	4	0.793983	0.294741	0.0464819	0.325255	1.15498	0.834031	0.0897512	1.13034	0.960696
YNL146C-A	YNL146C-A	4	-0.488716	0.225054	0.0668228	-0.668852	1.01545	0.617429	-0.531735	1.00983	0.753702
YNL162W-A	YNL162W-A	4	-0.64931	0.0938889	0.010002	-0.262378	0.122373	0.192199	-0.0867065	0.096776	0.578714
YNL209W	SSB2	4	1.67873	0.619718	0.045968	0.229341	0.745276	0.819533	-0.251258	0.586383	0.7906
YNL277W-A	YNL277W-A	4	1.66992	0.665152	0.0518493	1.5892	0.850822	0.227871	1.09031	0.684447	0.325712
YOL013W-B	YOL013W-B	4	1.0763	0.312816	0.0310403	-0.084455	0.718514	0.93603	-0.392384	0.708803	0.736181
YOL019W-A	YOL019W-A	4	0.176854	0.444142	0.574665	0.8219	1.19503	0.601365	0.7508	1.12318	0.683625
YOL038C-A	YOL038C-A	4	-0.0664162	0.363841	0.797047	-0.792039	0.868145	0.479196	-0.770728	0.903773	0.598997
YOL048C	RRT8	4	0.341416	0.524211	0.384083	0.643317	0.873519	0.572805	0.529081	0.722545	0.649213
YOL052C-A	DDR2	4	0.985277	1.55276	0.394327	0.147321	0.879177	0.903191	-0.138779	0.567813	0.881469
YOL154W	ZPS1	4	0.11433	0.408204	0.689446	-0.334652	0.290502	0.394034	-0.370687	0.198826	0.271106
YOL164W	BDS1	4	1.3666	0.72333	0.083592	-0.0420273	1.06121	0.981365	-0.431506	0.940116	0.777867
YOL164W-A	YOL164W-A	4	-0.397569	0.581358	0.364886	-0.00164703	0.79852	0.999748	0.0998931	0.643158	0.921332
YOR020W-A	YOR020W-A	4	-0.79719	0.653908	0.16932	-0.448436	0.76832	0.65765	-0.228716	0.632241	0.821763
YOR034C-A	YOR034C-A	4	0.501305	0.748489	0.37356	0.365153	1.42382	0.853094	0.210603	1.37929	0.922905
YOR069W	VPS5	4	-2.05246	0.543383	0.0261715	2.69513	0.738967	0.0838683	3.21672	0.776869	0.0683958
YOR087W	YVC1	4	-0.180192	0.8908	0.775237	-0.351922	1.08756	0.811044	-0.305617	1.19596	0.876812
YOR239W	ABP140	4	-0.139582	0.855356	0.819265	-0.0212849	0.598192	0.983849	0.00865983	0.756061	0.995553
YPL038W-A	YPL038W-A	4	0.502102	0.385669	0.154102	-0.668998	0.649427	0.434571	-0.807997	0.566209	0.369253
YPL152W-A	YPL152W-A	4	1.12858	0.63669	0.0931546	-0.134315	0.703664	0.890491	-0.456054	0.563291	0.623214
YPL189C-A	COA2	4	-3.72132	0.159445	0.00175792	4.78515	0.718321	0.0291373	5.73993	0.731889	0.0180229
YPL277C	YPL277C	4	-0.202267	0.399308	0.483182	0.014228	0.653651	0.98955	0.0611	0.603451	0.954383
YPR089W	YPR089W	4	0.549008	0.377694	0.127905	0.304867	0.281463	0.418066	0.137942	0.201308	0.674932
YPR108W-A	YPR108W-A	4	-0.149667	0.366536	0.564116	-0.631907	0.898131	0.592125	-0.589838	0.827858	0.662564
YPR159C-A	YPR159C-A	4	0.834209	1.05648	0.307396	0.6694	0.966951	0.598229	0.417437	0.716276	0.724483
YBR084W	MIS1	4	0.788212	0.880669	0.261665	-0.590935	1.21448	0.713059	-0.881241	1.13669	0.637041
YBR092C	PHO3	4	0.374333	0.438739	0.278905	0.303145	0.17226	0.247847	0.204399	0.199317	0.522295
YBR093C	PHO5	4	-0.478276	0.572613	0.285868	-0.803201	0.625254	0.358115	-0.762211	0.60474	0.427503
YBR094W	PBY1	4	-0.333988	0.407037	0.292889	-0.34294	0.850979	0.765284	-0.301992	0.823667	0.820889
YBR096W	YBR096W	4	1.33136	0.240951	0.0143813	0.856024	1.02145	0.517665	0.540863	1.09567	0.766205
YBR098W	MMS4	4	-0.457574	0.29368	0.113808	0.0627405	0.571284	0.940198	0.172881	0.556351	0.853067
YBR099C	YBR099C	4	-0.91343	0.683873	0.147841	0.117752	0.761834	0.912717	0.358499	0.801854	0.781492
YBR103W	SIF2	2	9.13098	0.4595	0.0668777	2.29766	1.00054	0.513897	-0.0461601	1.2139	0.990527
YBR108W	AIM3	4	1.22076	0.191349	0.0112315	-0.00934455	0.74274	0.993977	-0.368785	0.791234	0.776113
YBR116C	YBR116C	4	-0.557363	0.482651	0.183724	-0.731308	0.822781	0.48964	-0.662267	0.770725	0.598529
YBR119W	MUD1	4	-2.04938	0.568469	0.0282135	-0.0777276	0.512968	0.91384	0.459729	0.713275	0.699803
YBR120C	CBP6	4	-4.23947	0.273149	0.00290982	4.87198	0.359499	0.0105095	6.442	0.413972	0.00746867
YBR128C	ATG14	4	-2.03229	0.109309	0.00223798	-1.47445	0.659785	0.18145	-1.06246	0.697841	0.345969
YBR129C	OPY1	4	3.09838	0.929825	0.0326466	0.495329	0.708686	0.594675	-0.338849	0.569429	0.722657
YBR130C	SHE3	4	0.165307	0.293655	0.442375	-0.56064	0.609464	0.477748	-0.676357	0.680754	0.537124
YBR132C	AGP2	4	-0.423158	0.591725	0.348152	-0.425923	0.640304	0.615193	-0.367531	0.649956	0.729448
YBR134W	YBR134W	4	0.305773	0.527219	0.430529	-0.385329	0.479236	0.536197	-0.524669	0.546437	0.553157
YBR137W	YBR137W	4	1.22662	0.773461	0.11097	0.0440545	0.939699	0.979419	-0.312387	1.12567	0.864987
YBR139W	YBR139W	4	-0.425127	0.156543	0.045765	-0.159492	0.661156	0.859619	-0.0775234	0.740879	0.95248
YBR140C	IRA1	4	-6.18494	0.650446	0.00583927	-0.974201	0.629158	0.291076	0.627484	0.552147	0.476614
YBR144C	YBR144C	4	1.14067	0.688314	0.104189	0.024875	0.582521	0.980503	-0.309496	0.649478	0.770539
YBR145W	ADH5	4	0.50602	0.493925	0.216988	0.00642512	0.601463	0.994696	-0.15433	0.739781	0.896769
YBR147W	RTC2	4	-0.687202	0.20276	0.0317878	-0.460417	0.763914	0.651295	-0.332112	0.850779	0.810792
YBR148W	YSW1	4	-0.324116	0.312213	0.21331	-0.477203	0.997921	0.718741	-0.450588	1.05436	0.790682
YBR149W	ARA1	4	0.452458	0.466527	0.2351	0.635678	0.944532	0.610683	0.544112	1.04803	0.756475
YBR151W	APD1	4	0.30206	1.45198	0.767964	-0.0282552	0.853762	0.984324	-0.135699	1.30955	0.953176
YBR157C	ICS2	4	1.16763	0.583233	0.0760842	0.0220342	1.33191	0.992987	-0.320026	1.47678	0.895141
YBR158W	AMN1	4	-0.545423	0.762544	0.348152	0.103195	0.889764	0.936998	0.241085	1.16972	0.898183
YBR161W	CSH1	4	0.58553	1.68799	0.622278	0.0630103	0.275746	0.869668	-0.114803	0.379673	0.854979
YBR162C	TOS1	4	-0.248712	0.537788	0.518961	-0.306198	0.509905	0.652783	-0.285617	0.451443	0.706177
YBR162W-A	YSY6	4	0.347653	0.266423	0.15368	-0.0817937	0.741671	0.940198	-0.206454	0.755305	0.867226
YBR164C	ARL1	4	-2.57968	0.384722	0.0104272	-0.239155	0.211262	0.404035	0.430749	0.224324	0.26025
YBR165W	UBS1	4	0.15451	0.477175	0.645064	-0.038996	0.884752	0.980503	-0.106634	0.845721	0.940716
YBR166C	TYR1	4	0.0476638	0.424589	0.87521	-0.685444	0.563289	0.375572	-0.779472	0.569194	0.385018
YBR171W	SEC66	4	-0.0160638	0.83507	0.978091	1.68835	0.62764	0.13567	1.81714	0.680315	0.151246
YBR175W	SWD3	4	-0.704247	0.330736	0.0689058	2.2372	1.04991	0.193538	2.60343	1.16355	0.210146
YBR176W	ECM31	4	0.108526	0.632236	0.810511	-0.674179	1.33286	0.705295	-0.784037	1.41032	0.735723
YBR177C	EHT1	4	-0.0277632	0.534091	0.944608	-0.120036	0.711725	0.902844	-0.144359	0.767283	0.903267
YBR178W	YBR178W	4	-0.539058	0.439562	0.16815	-0.541396	0.704723	0.555789	-0.460991	0.751855	0.71594
YBR180W	DTR1	4	-0.318131	0.134498	0.0578032	-0.347041	0.927314	0.78024	-0.310826	1.01685	0.85416
YBR182C	SMP1	4	-0.303009	0.531042	0.436939	-0.644169	0.447246	0.315098	-0.637817	0.402062	0.328008
YBR184W	YBR184W	4	0.972444	1.22374	0.304936	0.188721	1.5205	0.932247	-0.085042	1.38077	0.968984
YBR185C	MBA1	4	1.33932	0.462953	0.0410515	0.206544	0.83681	0.857215	-0.166964	0.959882	0.911371
YBR186W	PCH2	4	-0.273166	0.264348	0.214531	-0.0917439	1.02758	0.954176	-0.0458704	1.04903	0.976761
YBR187W	GDT1	4	2.78408	0.915493	0.0380665	1.40646	0.694317	0.209306	0.737828	0.548818	0.395812
YBR188C	NTC20	4	-0.566349	0.549691	0.215313	-0.467632	0.917589	0.703256	-0.373315	0.919495	0.805033
YBR195C	MSI1	4	-1.58591	0.265012	0.0125293	0.210269	0.699849	0.822982	0.644671	0.818717	0.631164
YBR197C	YBR197C	4	-0.257555	0.197974	0.154147	-0.25877	1.31995	0.884839	-0.231646	1.44841	0.918302
YBR200W	BEM1	3	1.85722	0.736253	0.108588	6.21734	0.101852	0.00938933	6.22051	0.100746	0.00783886
YBR201W	DER1	4	-1.11024	0.344046	0.0344005	-0.937745	0.907477	0.434571	-0.733916	0.915795	0.623375
YBR203W	COS111	4	0.413284	0.451725	0.25426	-0.863924	0.654128	0.348087	-1.07432	0.813959	0.403262
YBR205W	KTR3	4	-1.01046	0.870266	0.182368	-0.215603	0.822528	0.847551	0.0231123	0.666635	0.98359
YBR206W	YBR206W	4	0.125573	0.437927	0.682432	-0.263021	1.02888	0.853395	-0.342038	1.02711	0.837235
YBR207W	FTH1	4	-0.343983	0.256733	0.147259	-0.0743431	0.798659	0.950784	-0.00741451	0.819847	0.995553
YBR209W	YBR209W	4	0.00738649	0.17564	0.954231	-0.377627	0.739026	0.703256	-0.433923	0.83272	0.754928
YBR210W	ERV15	4	-0.276295	0.828547	0.636014	0.401855	0.694103	0.659504	0.491266	0.569905	0.598529
YBR212W	NGR1	4	0.319239	0.761781	0.554992	0.192982	0.982172	0.884839	0.0999215	0.996311	0.954383
YBR213W	MET8	4	0.330596	0.450536	0.338242	1.25101	0.635057	0.215067	1.24629	0.584688	0.226328
YBR214W	SDS24	4	1.14805	0.3803	0.038299	-0.0733662	1.53083	0.978805	-0.418268	1.67577	0.876952
YBR215W	HPC2	4	-0.0914554	0.428935	0.762561	0.00841076	0.416899	0.990395	0.0127768	0.371516	0.983645
YBR216C	YBP1	4	-0.903199	0.627851	0.130503	-0.0253158	0.42793	0.973136	0.200238	0.357676	0.734215
YBR217W	ATG12	4	-0.181891	0.552362	0.640702	-0.20542	1.07773	0.890688	-0.194574	1.07346	0.906346
YBR218C	PYC2	4	0.841613	0.277038	0.0380665	0.120379	0.832131	0.919335	-0.123174	0.90766	0.936161
YBR219C	YBR219C	4	0.992241	0.331842	0.0387313	-0.144361	0.412231	0.79436	-0.452386	0.475341	0.555611
YBR220C	YBR220C	4	1.29942	0.807637	0.108638	0.411301	0.401919	0.438592	0.066511	0.556763	0.944137
YBR222C	PCS60	4	0.219506	0.372283	0.423903	-0.799634	0.63104	0.362286	-0.950977	0.738987	0.416332
YBR223C	TDP1	4	-0.223893	0.310712	0.345436	-1.39453	0.645215	0.188758	-1.47489	0.730054	0.24308
YBR225W	YBR225W	4	-2.55939	0.303283	0.00715055	-1.87309	0.846977	0.183275	-1.35005	0.985027	0.385018
YBR226C	YBR226C	4	-2.38069	0.468794	0.0162687	-0.46052	0.620534	0.568897	0.13531	0.652844	0.897054
YBR227C	MCX1	4	1.25371	0.52463	0.0567256	-1.16163	0.763119	0.296917	-1.62979	0.840105	0.256991
YBR228W	SLX1	4	-0.549511	0.503388	0.198632	-0.771644	1.2234	0.635992	-0.708258	1.40429	0.766205
YBR230C	OM14	4	-0.642752	0.3866	0.103703	-0.493536	0.975162	0.705295	-0.380365	1.0278	0.820667
YBR231C	SWC5	4	0.0594799	0.243078	0.72797	0.993716	0.0954785	0.0143907	1.0416	0.0800544	0.00974187
YBR233W	PBP2	4	-0.368168	0.290392	0.160012	-0.781924	0.701271	0.405745	-0.769492	0.687518	0.486036
YBR235W	VHC1	4	0.816473	0.318572	0.0501435	0.607158	0.487922	0.369205	0.412631	0.60258	0.674932
YBR238C	YBR238C	4	-0.0372311	0.600432	0.932992	0.308077	1.10302	0.835455	0.32338	1.04851	0.854065
YBR239C	ERT1	4	0.690676	0.799955	0.273736	-0.585908	0.523346	0.405745	-0.848852	0.537679	0.329891
YBR240C	THI2	4	-1.14979	0.27797	0.0223001	0.264337	0.903276	0.828453	0.58301	0.963567	0.719375
YBR241C	YBR241C	4	-0.195305	0.701938	0.69122	-0.407816	0.369071	0.411194	-0.410765	0.266776	0.341223
YBR242W	YBR242W	4	-0.132272	0.844913	0.82656	-0.482806	0.795417	0.648143	-0.50964	0.727993	0.666124
YBR244W	GPX2	4	0.62344	0.474423	0.152361	0.10396	0.638033	0.906063	-0.0807798	0.82392	0.954383
YBR245C	ISW1	4	-0.304595	0.945275	0.646058	0.358935	0.442917	0.532791	0.452449	0.438644	0.520632
YBR246W	RRT2	4	0.909902	0.213648	0.0214194	1.12213	0.298696	0.0801817	0.946333	0.290024	0.107647
YBR249C	ARO4	4	0.686678	0.311309	0.0650901	0.136699	0.54954	0.856096	-0.0626681	0.630014	0.954383
YBR250W	SPO23	4	1.10892	0.276958	0.0238686	-0.0525775	0.762296	0.965449	-0.384881	0.82362	0.775838
YBR255W	MTC4	4	0.243336	0.163575	0.123256	0.395886	1.32359	0.824386	0.341322	1.41331	0.881765
YBR258C	SHG1	4	0.058909	0.392955	0.834504	-0.299248	0.334173	0.486425	-0.362993	0.345502	0.513531
YBR259W	YBR259W	4	0.894116	0.244469	0.0275343	0.197203	0.44052	0.739796	-0.0542027	0.431288	0.940717
YBR260C	RGD1	4	-0.119612	0.636003	0.791217	1.75319	0.656948	0.137658	1.91618	0.663841	0.130975
YBR262C	MIC12	4	0.671061	0.389349	0.0975863	-0.0374019	0.365423	0.94389	-0.24751	0.446256	0.735982
YBR263W	SHM1	4	2.36644	0.782188	0.0382076	0.715161	0.408192	0.249901	0.102061	0.242684	0.7951
YBR264C	YPT10	4	0.0628513	0.614217	0.885756	-0.12945	0.650868	0.884186	-0.179603	0.567863	0.849431
YCL001W	RER1	4	1.00302	0.465435	0.0676552	0.183078	0.335243	0.677411	-0.0996141	0.335307	0.857123
YCL002C	YCL002C	4	1.34253	0.496951	0.0462348	1.30249	0.563106	0.171241	1.02284	0.496872	0.234861
YCL005W	LDB16	3	0.671303	0.63493	0.303426	1.37052	0.347097	0.180507	1.28207	0.447121	0.289631
YCL006C	YCL006C	4	0.619381	0.709301	0.270609	0.0673452	0.693459	0.947812	-0.119439	0.905246	0.937217
YCL013W	YCL013W	3	1.43087	0.674926	0.135076	0.258029	0.523483	0.768339	-0.136303	0.448893	0.876952
YCL014W	BUD3	4	1.31486	0.402647	0.0337834	0.597467	0.0535394	0.0132139	0.26451	0.134049	0.251245
YCL016C	DCC1	1	-0.545563	NA	NA	1.38589	NA	NA	1.63471	NA	NA
YCL023C	YCL023C	1	0.975879	NA	NA	0.556429	NA	NA	0.313508	NA	NA
YCL026C	YCL026C	4	0.110549	0.53581	0.770026	0.597899	0.433208	0.330614	0.59746	0.323836	0.273226
YCL027W	FUS1	3	0.54414	0.736339	0.429831	0.56875	1.18265	0.77188	0.446087	1.09835	0.839067
YCL028W	RNQ1	4	0.582363	0.790297	0.337001	-0.333712	0.964314	0.797734	-0.54495	1.07909	0.766205
YCL029C	BIK1	4	0.454436	1.08658	0.555426	3.90556	0.884638	0.0639638	4.09614	0.950117	0.0634595
YCL032W	STE50	2	-3.15617	0.647265	0.168196	0.219062	1.7556	0.961159	1.08774	1.72868	0.827902
YCL033C	MXR2	4	0.980169	0.585099	0.102524	0.413903	0.857428	0.715631	0.157475	1.06773	0.927492
YCL034W	LSB5	4	-0.119685	0.454981	0.708476	-0.54862	0.49833	0.411348	-0.584618	0.528297	0.490604
YCL039W	GID7	4	1.12777	0.215627	0.0156183	0.321958	0.865186	0.781154	0.0168331	0.926004	0.992891
YCL040W	GLK1	4	-0.225737	0.470827	0.504894	-1.04144	0.539818	0.221792	-1.09076	0.55378	0.251924
YCL042W	YCL042W	4	0.124986	0.415991	0.667925	-0.404061	1.04056	0.772581	-0.495109	1.02908	0.768634
YCL044C	MGR1	4	0.445147	0.268385	0.104079	0.688494	1.529	0.738096	0.603513	1.70008	0.826016
YCL046W	YCL046W	4	0.743985	0.729405	0.218376	0.130959	0.769642	0.902103	-0.0847261	0.872065	0.954383
YCL047C	POF1	4	0.0742703	0.521197	0.842747	-0.00873816	1.28578	0.996259	-0.0516077	1.29811	0.978934
YCL050C	APA1	4	0.153601	1.38402	0.876258	-0.234084	0.412729	0.665823	-0.318337	0.253737	0.429412
YCL051W	LRE1	4	-0.501143	0.387794	0.155303	-0.613197	0.619126	0.4492	-0.549466	0.749933	0.649213
YCL055W	KAR4	4	0.0644845	0.643762	0.88829	-0.164507	0.670707	0.85791	-0.218142	0.625602	0.827561
YCL056C	PEX34	4	-0.0651982	0.306635	0.76286	0.435697	0.734746	0.655172	0.469755	0.780825	0.720281
YCL057W	PRD1	4	-0.961409	0.377754	0.0507656	-0.459671	0.867296	0.689026	-0.255598	0.869842	0.859718
YCL063W	VAC17	4	-5.0224	1.45661	0.0309452	-1.50043	1.22483	0.371893	-0.265192	1.03621	0.876812
YCL064C	CHA1	4	-0.184244	0.342482	0.46036	-0.395061	0.449866	0.494839	-0.39996	0.562531	0.663812
YCL069W	VBA3	4	-0.150898	0.324796	0.517231	-0.684786	1.57024	0.744727	-0.723939	1.63099	0.783975
YCR001W	YCR001W	4	0.533775	0.492875	0.201089	0.293897	0.470565	0.639019	0.150333	0.445053	0.833749
YCR005C	CIT2	2	-0.291006	0.931611	0.793833	0.26181	0.703388	0.873048	0.343175	0.507003	0.820667
YCR007C	YCR007C	2	-0.238966	0.264457	0.518783	0.258719	0.249502	0.702602	0.325449	0.198062	0.669415
YCR008W	SAT4	1	1.40669	NA	NA	0.0583812	NA	NA	-0.346535	NA	NA
YCR015C	YCR015C	3	1.46948	0.864864	0.176875	0.222378	0.755505	0.859068	-0.185695	0.58678	0.874847
YCR016W	YCR016W	3	0.783172	0.470397	0.181446	-0.333524	0.724478	0.78024	-0.600184	0.657381	0.66557
YCR017C	CWH43	3	1.34806	1.62309	0.387072	-0.0368565	1.6653	0.9918	-0.43382	1.36996	0.874847
YCR019W	MAK32	2	-0.396685	0.429745	0.512771	0.534165	1.69425	0.893412	0.668252	1.95936	0.899689
YCR020C-A	MAK31	1	-0.762866	NA	NA	0.258504	NA	NA	0.469853	NA	NA
YCR021C	HSP30	1	-0.185482	NA	NA	-0.639702	NA	NA	-0.665409	NA	NA
YDL002C	NHP10	4	-2.70208	0.381285	0.00958465	-0.331569	0.833243	0.768339	0.364138	0.956629	0.817866
YDL005C	MED2	2	-2.33291	0.314865	0.125763	-0.669296	1.09597	0.801376	-0.104707	1.27764	0.973474
YDL006W	PTC1	4	-7.06464	1.0634	0.0105463	-1.1	0.41204	0.137658	0.733679	0.47922	0.343741
YDL009C	YDL009C	4	-1.32693	0.391741	0.0317878	-1.12987	0.529696	0.193372	-0.88283	0.523457	0.30711
YDL010W	GRX6	4	0.32448	0.144195	0.063017	-0.197552	0.427299	0.728247	-0.325823	0.501899	0.69805
YDL011C	YDL011C	4	-0.153844	0.482398	0.64952	-0.661173	1.1031	0.653328	-0.697472	1.18717	0.723048
YDL012C	YDL012C	4	0.131505	0.266263	0.492558	0.562437	0.561976	0.444805	0.553146	0.682833	0.623214
YDL019C	OSH2	4	0.185092	0.274775	0.371307	0.169773	0.405468	0.755596	0.111742	0.48569	0.890342
YDL020C	RPN4	4	3.86976	0.405904	0.00583927	1.84263	0.723046	0.149381	0.91197	0.869048	0.513531
YDL022W	GPD1	4	-0.0300848	0.287648	0.883423	-0.478119	0.592847	0.535166	-0.532759	0.622696	0.598718
YDL023C	YDL023C	4	0.403023	0.492754	0.293874	0.00879436	0.573472	0.993049	-0.12332	0.649047	0.902441
YDL024C	DIA3	4	0.124443	0.60217	0.769738	-0.212558	0.478029	0.741082	-0.2869	0.443147	0.698497
YDL026W	YDL026W	4	-0.71703	0.881027	0.295835	1.23948	0.321135	0.0782375	1.52299	0.286299	0.0404129
YDL027C	YDL027C	4	-0.650105	0.40516	0.108966	-0.44926	0.51621	0.499845	-0.330231	0.647175	0.763312
YDL032W	YDL032W	4	0.640856	1.11031	0.432096	4.4085	0.552619	0.0207022	4.5911	0.460724	0.0130576
YDL033C	SLM3	4	0.443694	0.35756	0.16542	4.44491	0.340808	0.0108737	4.68509	0.325351	0.00799372
YDL034W	YDL034W	4	-2.88494	1.16116	0.0527122	-1.00741	0.96387	0.429354	-0.31965	1.30707	0.881469
YDL035C	GPR1	4	-3.07057	0.349112	0.00660417	-1.38702	0.265064	0.0458067	-0.680828	0.300044	0.204771
YDL036C	PUS9	4	0.106431	0.220603	0.502277	0.159019	0.784928	0.881898	0.121774	0.827218	0.927492
YDL038C	YDL038C	4	-0.596691	0.747713	0.303597	-0.962443	1.28841	0.567414	-0.902527	1.31366	0.674802
YDL039C	PRM7	4	-0.328102	0.702224	0.515101	-0.131978	0.651976	0.881898	-0.0744164	0.639884	0.947036
YDL046W	NPC2	4	-1.26094	0.456602	0.044811	0.115799	0.407408	0.832758	0.452317	0.452633	0.534703
YDL048C	STP4	4	1.30321	0.582108	0.0636963	0.489524	0.600844	0.530976	0.150449	0.695068	0.895251
YDL049C	KNH1	4	-0.24704	0.718417	0.62562	-0.213886	0.498965	0.750074	-0.185785	0.425149	0.788162
YDL050C	YDL050C	4	-0.26587	0.607746	0.539674	-0.722314	1.37581	0.694415	-0.73297	1.48668	0.766205
YDL051W	LHP1	4	0.689403	0.624406	0.195305	0.83044	0.810172	0.43775	0.690298	0.860463	0.623375
YDL052C	SLC1	4	-0.887938	0.255035	0.0303079	0.705139	0.585719	0.378367	0.989631	0.639051	0.340575
YDL053C	PBP4	4	0.263607	0.199796	0.151397	0.176297	0.637229	0.836469	0.097153	0.66333	0.927698
YDL054C	MCH1	4	0.63003	0.261065	0.0559057	-0.649182	0.373984	0.251398	-0.900853	0.427444	0.228792
YDL056W	MBP1	4	-1.07728	0.604034	0.0922398	-0.0608064	0.942111	0.970875	0.20974	0.879336	0.884304
YDL057W	YDL057W	4	0.52493	0.321985	0.106915	0.323565	0.471035	0.601971	0.185008	0.476012	0.810792
YDL059C	RAD59	4	-0.710168	0.398083	0.0922282	-0.762904	0.786324	0.455871	-0.654409	0.767274	0.598997
YDL062W	YDL062W	4	-1.07665	1.10746	0.234638	-1.0243	0.843772	0.376119	-0.837225	0.694152	0.449181
YDL063C	SYO1	4	-1.01393	0.300475	0.0319897	-0.212233	0.4172	0.70334	0.0277317	0.427224	0.967016
YDL065C	PEX19	4	-0.843367	0.147463	0.0136749	-0.608925	0.166483	0.0836056	-0.450345	0.203915	0.214254
YDL066W	IDP1	4	-1.01862	0.38636	0.0480527	-0.0874483	0.486153	0.896967	0.1646	0.433561	0.81862
YDL067C	COX9	4	-3.47758	0.758486	0.0188754	5.26085	0.450591	0.0123211	6.65415	0.441409	0.00783886
YDL068W	YDL068W	4	-2.14413	1.20008	0.0919817	5.27684	0.666798	0.0208847	6.30338	0.454421	0.00853685
YDL069C	CBS1	4	-0.345164	0.392308	0.267527	-0.225344	1.00351	0.871521	-0.171144	1.05137	0.917153
YDL071C	YDL071C	4	-1.60779	1.10478	0.127731	-0.574652	0.682094	0.514275	-0.20207	0.641009	0.849465
YDL072C	YET3	4	-0.604754	0.688031	0.267873	-0.577919	0.745299	0.551823	-0.482534	0.768561	0.707002
YDL074C	BRE1	4	-0.338974	0.535329	0.394849	4.4226	0.549109	0.0207012	4.87693	0.662671	0.0203318
YDL076C	RXT3	4	-0.110754	0.440124	0.720357	0.273236	0.930735	0.828049	0.305826	1.11235	0.865778
YDL079C	MRK1	4	0.515265	0.283166	0.0895331	-0.191429	0.722283	0.846345	-0.371841	0.737403	0.766205
YDL080C	THI3	4	-3.36013	0.297913	0.00461284	-0.846915	0.44734	0.226056	-0.0140885	0.469275	0.985669
YDL082W	RPL13A	4	-0.074506	0.537299	0.847394	-0.744412	0.958978	0.551593	-0.80981	1.14175	0.663823
YDL085W	NDE2	4	0.612735	0.338343	0.0902621	-0.0199325	0.481658	0.980642	-0.212427	0.575473	0.820667
YDL086W	YDL086W	4	0.13816	1.01544	0.849909	0.401495	0.451737	0.48964	0.376453	0.665157	0.729448
YDL088C	ASM4	4	-1.64329	0.277234	0.0127688	-0.636315	0.679178	0.469779	-0.259264	0.791685	0.842331
YDL089W	NUR1	4	0.699606	0.277986	0.0517865	0.568587	0.344245	0.268916	0.402989	0.405701	0.537124
YDL091C	UBX3	4	0.827187	0.169486	0.0172738	0.860992	0.516378	0.266572	0.685452	0.514602	0.400783
YDL093W	PMT5	4	-0.128047	0.193112	0.377971	-0.859728	0.81891	0.428043	-0.920314	0.929573	0.537707
YDL094C	YDL094C	4	-0.158786	0.37911	0.554992	-0.340273	0.707816	0.717465	-0.347464	0.718624	0.768383
YDL096C	OPI6	4	0.452517	0.889889	0.481529	0.402368	0.69972	0.661412	0.290615	0.521449	0.735455
YDL099W	BUG1	4	1.54207	0.316109	0.0172738	0.177587	0.586054	0.82138	-0.254401	0.722934	0.827561
YDL100C	GET3	4	16.0031	0.279755	0.000944669	7.53489	0.342148	0.00636081	3.74662	0.307093	0.0104248
YDL101C	DUN1	4	1.05214	1.21359	0.272764	0.426387	0.657367	0.624252	0.15117	0.39071	0.810792
YDL104C	QRI7	4	4.0376	1.03044	0.0248155	2.63371	0.973407	0.134513	1.72511	0.968858	0.289631
YDL107W	MSS2	4	-4.18951	0.246668	0.00254114	5.13157	0.807609	0.0316155	6.71024	0.931352	0.0210688
YDL109C	YDL109C	4	-0.348441	0.411561	0.281248	-0.814096	0.861577	0.468532	-0.809892	0.857425	0.555611
YDL110C	TMA17	4	0.000210418	0.349857	0.999116	0.352545	0.560832	0.636853	0.361356	0.529002	0.674932
YDL113C	ATG20	4	2.48841	1.53411	0.107661	0.426145	0.728783	0.65765	-0.245615	0.949187	0.875186
YDL114W	YDL114W	4	-1.00011	0.363303	0.0449418	-1.26025	1.2973	0.455871	-1.11471	1.44641	0.638571
YDL117W	CYK3	4	0.555145	0.221098	0.0518493	4.46227	0.594796	0.0224845	4.67318	0.650314	0.0210902
YDL118W	YDL118W	4	0.915441	0.560701	0.106728	-0.115415	0.624723	0.893412	-0.399735	0.588085	0.676077
YDL119C	YDL119C	4	-1.58372	0.200282	0.00804599	-0.144568	0.675723	0.875597	0.258553	0.717196	0.823049
YDL121C	YDL121C	4	-1.13318	0.263646	0.0211326	-0.205331	0.409517	0.708009	0.068151	0.420321	0.917525
YDL123W	SNA4	4	-0.107477	0.257517	0.556087	-0.296081	0.706888	0.755596	-0.313616	0.705584	0.783294
YDL124W	YDL124W	4	1.31298	0.67159	0.0788533	0.313883	0.819152	0.776029	-0.0430737	0.749362	0.971187
YDL125C	HNT1	4	-0.119776	0.658704	0.797875	-0.465968	0.673087	0.598229	-0.494796	0.849321	0.724483
YDL127W	PCL2	4	-0.630565	0.293174	0.0677753	-0.428021	0.52416	0.52928	-0.312551	0.532413	0.723048
YDL128W	VCX1	4	0.341303	0.0534272	0.0112159	-0.133654	0.609741	0.873048	-0.261044	0.653668	0.808121
YDL129W	YDL129W	4	0.115248	0.149698	0.318069	0.312415	0.826069	0.777733	0.285998	0.867874	0.841045
YDL130W	RPP1B	4	-0.288791	0.257301	0.191491	-0.307134	0.867564	0.793396	-0.275569	0.924157	0.856657
YDL131W	LYS21	4	-1.87153	0.348973	0.0150674	-1.10727	0.657926	0.262836	-0.707923	0.635786	0.487805
YDL133W	SRF1	4	-0.267375	0.240756	0.193946	0.140824	0.568429	0.856975	0.205205	0.637489	0.845825
YDL134C	PPH21	4	-2.04564	0.676241	0.0382076	-1.86709	1.50832	0.370377	-1.48536	1.64048	0.575679
YDL134C-A	YDL134C-A	4	0.545126	0.829441	0.381341	-0.040153	1.11007	0.983518	-0.215731	1.16584	0.904996
YDL135C	RDI1	4	0.698524	0.669371	0.211952	0.878638	0.304362	0.121991	0.740144	0.154067	0.0492725
YDL137W	ARF2	4	-0.515157	0.500574	0.215569	-0.449305	0.754364	0.654385	-0.367536	0.730392	0.766205
YDL138W	RGT2	4	-1.16116	0.409753	0.0425698	-0.68064	0.888857	0.556397	-0.440525	1.0627	0.797494
YDL146W	LDB17	4	0.816096	0.312324	0.0485623	2.01958	0.476479	0.0680372	1.94727	0.553149	0.0914842
YDL149W	ATG9	4	-1.31888	0.228936	0.0134849	-1.7098	1.45322	0.386437	-1.51512	1.60664	0.555611
YDL154W	MSH5	4	0.313725	0.731126	0.546893	-0.933173	0.868956	0.419504	-1.12207	0.844071	0.401615
YDL155W	CLB3	4	-0.14785	0.421111	0.617831	-0.229159	0.822191	0.835503	-0.229763	0.811943	0.863899
YDL156W	CMR1	4	0.939049	0.521511	0.0909055	0.74503	0.625635	0.381868	0.528582	0.695365	0.640561
YDL157C	YDL157C	4	0.50069	0.233728	0.0680415	-0.091845	0.44942	0.881185	-0.259624	0.527417	0.766422
YDL161W	ENT1	4	-0.127224	0.770464	0.817435	-0.27312	0.656018	0.758487	-0.283219	0.924732	0.854154
YDL162C	YDL162C	4	-0.86972	0.298698	0.0405601	-0.292545	0.346188	0.513664	-0.099337	0.370963	0.871348
YDL167C	NRP1	4	-0.568523	0.65571	0.272764	-0.571893	0.5182	0.411194	-0.485989	0.520912	0.560357
YDL168W	SFA1	4	-1.05054	0.635292	0.10457	-0.86263	1.17694	0.574505	-0.668787	1.25139	0.750912
YDL169C	UGX2	4	0.30281	0.376304	0.300312	-0.079405	1.12137	0.964236	-0.191478	1.20744	0.918934
YDL170W	UGA3	4	0.397532	0.653714	0.411806	0.288608	0.26504	0.417664	0.1822	0.144633	0.427503
YDL171C	GLT1	4	0.660951	0.429462	0.116215	0.687392	1.07885	0.630624	0.542738	1.19121	0.778047
YDL172C	YDL172C	4	-1.92736	0.286269	0.0104185	-0.116818	0.340035	0.799658	0.383572	0.350813	0.493007
YDL174C	DLD1	4	0.0839507	0.139441	0.416369	-0.674828	0.773623	0.498481	-0.777957	0.843627	0.565256
YDL175C	AIR2	4	-0.709663	0.341905	0.0721257	0.383882	0.916736	0.755596	0.591382	1.06947	0.736213
YDL176W	YDL176W	4	0.356099	0.0525761	0.0103168	-1.12791	0.258685	0.0652512	-1.34534	0.275618	0.0484516
YDL177C	YDL177C	4	1.94228	0.68681	0.0427598	1.04845	0.833726	0.36449	0.581261	0.763951	0.640561
YDL178W	DLD2	4	-0.0118727	0.50144	0.973576	-0.44023	1.26817	0.797018	-0.496622	1.27883	0.810792
YDL179W	PCL9	4	0.630428	0.470894	0.147259	0.395643	0.235715	0.26385	0.234191	0.277377	0.604836
YDL180W	YDL180W	4	0.693018	0.859452	0.29977	-0.0398838	0.916161	0.980503	-0.256268	0.87983	0.861225
YDL182W	LYS20	4	-2.33619	0.52875	0.0202557	-0.849722	0.702796	0.376832	-0.299825	0.666749	0.780553
YDL183C	YDL183C	4	0.118932	0.61471	0.785571	0.607279	0.574933	0.427554	0.605337	0.765581	0.628209
YDL184C	RPL41A	4	-0.177138	0.577574	0.661546	0.728791	0.23099	0.108178	0.819092	0.393332	0.232114
YDL186W	YDL186W	4	-1.24552	0.770663	0.108174	-0.96186	0.254838	0.0795385	-0.722768	0.412784	0.294853
YDL187C	YDL187C	4	0.451708	0.284066	0.110428	0.423056	0.821787	0.701358	0.313315	0.940467	0.837235
YDL188C	PPH22	4	-0.988453	0.854709	0.183384	-0.534912	0.342458	0.288647	-0.329878	0.602692	0.740376
YDL189W	RBS1	4	1.31558	0.301731	0.0208515	0.528801	1.31135	0.765202	0.189706	1.35967	0.93371
YDL190C	UFD2	4	23.8972	0.343511	0.00080811	1.30698	1.33235	0.452817	-5.1991	1.51687	0.096892
YDL192W	ARF1	4	-4.19716	0.649633	0.0110811	0.181219	0.474173	0.776342	1.33402	0.580556	0.200321
YDL197C	ASF2	4	-0.730435	0.336404	0.0668228	-0.622728	0.626379	0.447808	-0.496519	0.690665	0.659419
YDL199C	YDL199C	4	-1.23304	0.559232	0.0651154	-0.593207	0.673233	0.493713	-0.325688	0.580353	0.73296
YDL203C	ACK1	4	-0.0393002	0.625234	0.93239	2.56192	1.01607	0.152275	2.77265	1.21146	0.202
YDL204W	RTN2	4	0.382827	0.382725	0.225135	-0.504276	0.641281	0.54765	-0.675173	0.723332	0.560357
YDL206W	YDL206W	4	0.559246	0.684059	0.293889	0.211249	0.593396	0.792787	0.0535077	0.621946	0.959027
YDL210W	UGA4	4	-0.272606	0.258562	0.209087	0.165561	0.913041	0.895836	0.233525	0.926401	0.876952
YDL211C	YDL211C	4	-0.265927	0.312332	0.279392	-0.112238	0.737869	0.91374	-0.070135	0.810351	0.959027
YDL215C	GDH2	4	0.448934	0.431742	0.213048	0.000278854	1.15692	0.999748	-0.145247	1.37442	0.952102
YDL216C	RRI1	4	-0.51415	0.484911	0.207267	-0.374886	0.33548	0.405745	-0.286962	0.248882	0.472645
YDL218W	YDL218W	4	0.611252	0.304525	0.0757708	-0.281713	0.666717	0.752321	-0.49643	0.784268	0.706177
YDL219W	DTD1	4	0.352201	0.577598	0.410617	-0.465844	0.223065	0.200345	-0.624962	0.230896	0.14806
YDL222C	FMP45	3	0.523343	0.802755	0.473935	-0.113088	0.897184	0.942294	-0.288958	0.768738	0.854065
YDL230W	PTP1	3	0.238686	0.316793	0.422745	0.120558	0.265478	0.783289	0.0434752	0.327734	0.948707
YDL231C	BRE4	2	-0.507725	0.156457	0.221708	-0.320472	1.09223	0.899439	-0.229616	1.14346	0.944137
YDL233W	MFG1	4	0.674387	0.444052	0.118633	-0.607017	0.802718	0.562083	-0.867288	0.911105	0.555611
YDL234C	GYP7	4	0.599769	0.487175	0.167089	0.566757	0.420553	0.337691	0.428563	0.552247	0.636581
YDL236W	PHO13	2	-1.07499	0.160876	0.135623	-0.980905	0.996859	0.709992	-0.790539	1.03863	0.805033
YDL240W	LRG1	4	0.706796	0.280526	0.0517139	0.257215	1.77574	0.919335	0.0627123	1.97512	0.985178
YDL241W	YDL241W	4	0.694143	0.313629	0.0648741	-0.25107	0.904708	0.836137	-0.486022	0.979632	0.766205
YDL242W	YDL242W	4	0.136833	0.594876	0.744148	-0.499796	0.619766	0.535166	-0.602392	0.761298	0.628209
YDR001C	NTH1	4	0.156079	0.695324	0.748818	0.891484	1.05336	0.512843	0.903857	1.15902	0.635005
YDR003W	RCR2	4	0.294883	0.627738	0.513106	0.250943	0.186339	0.337691	0.169618	0.314472	0.748631
YDR005C	MAF1	4	-1.0382	0.372777	0.0440026	-0.893078	0.74634	0.380889	-0.705276	0.748201	0.555611
YDR010C	YDR010C	4	-0.552688	0.424321	0.15404	0.0795588	0.650188	0.933512	0.217412	0.776807	0.864626
YDR011W	SNQ2	4	-0.0853822	0.18457	0.518961	-0.711185	0.950964	0.567175	-0.770708	1.08142	0.662564
YDR014W	RAD61	4	0.0353966	0.314618	0.87521	0.845193	0.234925	0.0856501	0.886882	0.249421	0.0900981
YDR018C	YDR018C	4	-0.146936	0.534872	0.694736	0.563945	0.587247	0.461166	0.631656	0.668158	0.555611
YDR022C	ATG31	4	-0.622656	0.311907	0.0762238	-0.468876	0.491996	0.465857	-0.359121	0.609889	0.723048
YDR026C	NSI1	4	-0.753321	0.60652	0.165243	-1.15661	0.781093	0.307177	-1.07024	0.693594	0.341223
YDR029W	YDR029W	4	0.221372	0.732759	0.666192	0.433409	0.756682	0.661721	0.388154	0.679188	0.728402
YDR036C	EHD3	4	0.105508	0.346399	0.664143	-0.296661	0.459371	0.626089	-0.373047	0.474621	0.632591
YDR042C	YDR042C	4	0.747883	0.934988	0.302888	-0.47491	0.421893	0.40566	-0.744052	0.546267	0.387301
YDR043C	NRG1	4	0.717805	0.568547	0.160996	0.887648	0.909559	0.454077	0.74461	0.867913	0.59861
YDR008C	YDR008C	4	-0.732424	0.141726	0.0159598	-0.400996	0.862923	0.726955	-0.183588	0.914425	0.899971
YDR049W	VMS1	4	-0.390727	0.993861	0.579104	-0.638521	0.725557	0.493866	-0.529256	0.761322	0.669415
YDR051C	DET1	4	-0.690901	0.266302	0.0489594	-0.861383	0.207261	0.069687	-0.669763	0.21436	0.115535
YDR055W	PST1	4	0.0193779	0.587652	0.964792	-0.625898	0.667264	0.469345	-0.637703	0.614403	0.516899
YDR056C	YDR056C	4	0.3389	0.270308	0.16269	-0.527799	1.21097	0.744832	-0.631346	1.30948	0.768383
YDR057W	YOS9	4	0.286412	0.909135	0.653541	0.431029	0.48827	0.49316	0.371123	0.365472	0.527175
YDR059C	UBC5	4	-0.190481	0.535588	0.613808	-0.425228	1.16412	0.78631	-0.369009	1.30685	0.864041
YDR061W	YDR061W	4	0.262298	0.623035	0.553421	-0.461632	0.880038	0.694415	-0.540557	0.897565	0.720281
YDR063W	AIM7	4	0.668722	0.163367	0.022826	0.820792	0.432267	0.225075	0.659098	0.442428	0.354521
YDR066C	RTR2	4	-1.25471	0.564083	0.0643662	-0.934678	0.509531	0.234825	-0.578252	0.520958	0.488577
YDR067C	OCA6	4	0.729806	0.279605	0.0486235	-0.124464	0.702765	0.89886	-0.331945	0.657645	0.766205
YDR068W	DOS2	4	0.311242	0.134884	0.0603454	-0.076561	0.328211	0.86546	-0.158694	0.347303	0.778047
YDR072C	IPT1	4	1.16356	0.299655	0.025124	-0.184836	0.886062	0.880231	-0.522529	0.998149	0.75432
YDR073W	SNF11	4	-1.51326	0.641272	0.0579986	0.407087	1.07117	0.777733	0.879395	1.16307	0.642574
YDR076W	RAD55	4	-3.82382	0.608757	0.0114995	-0.381778	0.933584	0.763583	0.751609	0.811545	0.564533
YDR078C	SHU2	4	0.562071	0.35226	0.109912	-0.243446	0.685394	0.792787	-0.404745	0.710821	0.728402
YDR079W	PET100	4	-4.73531	0.464933	0.00535398	4.49124	0.591241	0.022396	6.03733	0.615972	0.0130615
YDR084C	TVP23	4	-1.32701	0.264811	0.0164949	-0.47951	0.216788	0.183275	-0.0883365	0.295039	0.856657
YDR085C	AFR1	4	-0.501011	0.57687	0.272442	-2.0321	1.59208	0.359745	-1.93101	1.68898	0.475136
YDR089W	YDR089W	4	1.15219	0.139946	0.00741155	-0.00326146	1.55174	0.999748	-0.332267	1.57112	0.896056
YDR092W	UBC13	4	0.416389	0.225324	0.0870302	0.250359	0.552992	0.736367	0.14667	0.542888	0.869828
YDR093W	DNF2	4	-0.0408349	0.304303	0.85213	0.140759	0.516343	0.840224	0.169251	0.590391	0.862276
YDR094W	YDR094W	4	0.967376	0.132643	0.00928277	-0.277891	0.295206	0.469345	-0.560217	0.316591	0.289631
YDR096W	GIS1	4	1.06472	0.699226	0.118008	-0.132782	0.417868	0.81528	-0.439682	0.377889	0.467187
YDR097C	MSH6	4	-0.509804	0.443633	0.185176	-0.318129	1.00042	0.81528	-0.164215	0.979676	0.915686
YDR098C	GRX3	4	0.369633	0.502578	0.33724	0.133401	0.518849	0.852812	0.0401295	0.507893	0.960824
YDR099W	BMH2	4	-0.617805	0.301174	0.0733832	-0.486531	0.615291	0.545175	-0.305571	0.701503	0.788602
YDR100W	TVP15	4	1.22424	0.913699	0.147259	-0.0986086	0.839042	0.93603	-0.451743	0.900043	0.766205
YDR101C	ARX1	4	-1.86475	0.59536	0.0360601	-1.36714	0.592024	0.171299	-0.84274	0.656787	0.417597
YDR102C	YDR102C	4	-0.434459	0.269323	0.108332	-0.0855715	0.391698	0.873048	0.0528465	0.432257	0.943463
YDR104C	SPO71	4	0.455885	0.664355	0.363787	0.436588	0.76239	0.661721	0.32666	0.663177	0.766258
YDR105C	TMS1	4	0.0804249	0.60097	0.852255	0.0539773	0.656906	0.957656	0.0440183	0.515515	0.959027
YDR107C	TMN2	4	0.0430986	1.46274	0.968286	0.354104	0.524628	0.609776	0.363993	0.873301	0.796187
YDR108W	TRS85	4	0.8401	0.507106	0.104217	2.41052	0.663071	0.0843404	2.24467	0.594067	0.0796181
YDR110W	FOB1	4	0.0154145	0.390627	0.956961	-0.365004	0.745807	0.710266	-0.36799	0.744125	0.766205
YDR111C	ALT2	4	0.0186715	0.389407	0.948382	-0.429655	0.58391	0.572805	-0.4355	0.592753	0.649213
YDR112W	IRC2	4	0.0823588	0.622635	0.853925	0.120795	0.727487	0.904185	0.112221	0.822256	0.936161
YDR116C	MRPL1	4	3.43996	0.816896	0.0216563	2.0763	0.412649	0.04861	1.13079	0.532827	0.226583
YDR117C	TMA64	4	0.0914332	0.839085	0.878615	1.08283	0.707405	0.295959	1.09976	0.659943	0.308773
YDR119W	VBA4	4	-0.220828	0.320855	0.362576	-0.107283	0.981919	0.940198	-0.0327616	0.958894	0.983645
YDR120C	TRM1	4	0.375384	0.606343	0.404317	-0.361312	0.327401	0.411194	-0.470783	0.515598	0.569621
YDR121W	DPB4	4	-2.34233	0.302227	0.00833681	-0.715395	0.276394	0.146161	-0.0304802	0.327173	0.956269
YDR124W	YDR124W	4	-0.411505	0.205968	0.0762238	-0.1183	1.25032	0.949582	0.0123618	1.22758	0.995553
YDR126W	SWF1	4	-6.76493	0.477409	0.00321917	1.791	0.767852	0.170635	3.85898	0.895803	0.0634595
YDR127W	ARO1	4	-0.484492	0.4095	0.17688	-0.21619	0.909827	0.861598	-0.0667839	0.881253	0.962582
YDR130C	FIN1	4	1.45923	0.647859	0.062904	0.293735	0.471632	0.639424	-0.117486	0.397391	0.857692
YDR131C	YDR131C	4	0.532473	0.252038	0.0698311	-0.0188463	1.15145	0.993015	-0.164799	1.1847	0.933999
YDR132C	YDR132C	4	-0.537067	0.224551	0.0566971	-0.887995	1.2417	0.584875	-0.742707	1.24119	0.720986
YDR133C	YDR133C	4	0.25169	0.546877	0.520853	0.526766	0.682648	0.554185	0.479947	0.768784	0.708788
YDR134C	YDR134C	4	-0.807685	0.466634	0.0968947	-0.893411	0.903252	0.449362	-0.668147	1.03151	0.698497
YDR135C	YCF1	4	-1.05799	0.532125	0.0766585	-1.24832	0.779649	0.278889	-0.959341	0.751998	0.420553
YDR139C	RUB1	4	0.313873	0.368577	0.279392	0.125856	0.899445	0.921222	0.0488756	0.926603	0.97294
YDR142C	PEX7	4	0.37119	0.0485935	0.00859493	-1.06207	0.517422	0.20484	-1.19084	0.54088	0.215389
YDR143C	SAN1	4	0.882054	0.30265	0.0404957	-0.112115	0.720232	0.912458	-0.364318	0.747566	0.768227
YDR144C	MKC7	4	-0.41958	0.352093	0.175044	-0.148739	0.319936	0.726929	-0.016578	0.393956	0.977787
YDR147W	EKI1	4	-0.276516	0.586411	0.511913	0.416602	0.574013	0.57755	0.522966	0.609846	0.59861
YDR148C	KGD2	4	0.448251	0.246411	0.0895474	-0.260774	1.09288	0.861076	-0.388876	1.10736	0.827561
YDR149C	YDR149C	4	-0.463401	0.472874	0.23221	6.1457	0.233786	0.00565464	6.47529	0.14104	0.0020425
YDR150W	NUM1	4	0.473055	0.957433	0.492498	7.23441	0.554978	0.0108737	7.3186	0.294053	0.00384225
YDR152W	GIR2	4	-0.965066	0.0727055	0.00360531	-0.582024	1.1021	0.691503	-0.301032	1.13188	0.872338
YDR153C	ENT5	4	-0.310566	0.304266	0.218207	0.72296	0.415179	0.250829	0.848384	0.478145	0.289631
YDR154C	YDR154C	4	-0.103024	0.791319	0.856383	-0.720947	0.939051	0.555789	-0.699292	1.18105	0.723048
YDR155C	CPR1	4	-0.141928	0.500051	0.685286	-0.61936	0.809055	0.556397	-0.583208	0.787373	0.647657
YDR156W	RPA14	4	0.875558	0.483855	0.0903929	-0.649368	1.59537	0.763583	-0.915391	1.56122	0.723048
YDR157W	YDR157W	4	-0.218584	0.393072	0.447363	-0.449998	0.816868	0.676338	-0.386183	0.824672	0.775256
YDR162C	NBP2	4	-0.831774	0.825567	0.222597	-0.379482	0.868756	0.744727	-0.132025	1.01054	0.937442
YDR163W	CWC15	4	0.32486	0.587204	0.449281	-0.3063	0.495171	0.640842	-0.399198	0.609528	0.695154
YDR165W	TRM82	4	0.262566	0.230934	0.187911	-0.110435	0.541541	0.881185	-0.179147	0.575582	0.853016
YDR169C	STB3	4	-0.391427	0.315774	0.165735	0.338021	1.02961	0.808051	0.476109	1.03826	0.777867
YDR171W	HSP42	4	0.59769	0.442564	0.145083	-0.498332	0.765618	0.622508	-0.677647	0.773852	0.591493
YDR178W	SDH4	4	-1.76807	0.559578	0.0355047	0.172573	0.698238	0.857215	0.713462	0.600018	0.455615
YDR179C	CSN9	4	-0.637086	0.7471	0.27903	0.312974	0.50063	0.638839	0.523073	0.698474	0.645145
YDR179W-A	YDR179W-A	4	0.0404438	0.363768	0.876176	-0.463159	0.930334	0.709992	-0.476433	0.966328	0.766205
YDR181C	SAS4	4	1.43844	0.204561	0.00974185	-0.465761	0.498922	0.471756	-0.893082	0.559025	0.325712
YDR183W	PLP1	4	0.00664425	0.320075	0.976755	0.0578307	0.926835	0.972044	0.0698324	0.995346	0.964588
YDR184C	ATC1	4	-0.875594	0.485445	0.0907736	-0.385855	0.715648	0.681709	-0.125609	0.757066	0.916428
YDR185C	UPS3	4	1.73014	0.453811	0.025773	0.0625323	0.730328	0.955793	-0.435687	0.747241	0.724483
YDR186C	YDR186C	4	-2.53225	0.210171	0.00418733	-1.05799	0.802894	0.348791	-0.32688	0.812783	0.806739
YDR191W	HST4	4	-2.18701	0.441188	0.0168066	-1.39951	1.89569	0.571681	-0.780631	1.99844	0.810792
YDR192C	NUP42	4	0.460297	0.459678	0.224764	0.0979176	1.14673	0.955793	-0.0232407	1.11306	0.991676
YDR193W	YDR193W	4	-0.398064	0.377713	0.209181	0.0320918	0.309151	0.942799	0.16318	0.418522	0.810792
YDR194C	MSS116	4	-6.00871	0.233927	0.00162163	3.84441	0.720065	0.0439345	5.74863	0.718211	0.0176872
YDR197W	CBS2	4	-1.10256	1.7451	0.395776	5.88325	0.480748	0.011806	6.39442	0.509106	0.0100914
YDR198C	RKM2	4	-0.228872	0.299806	0.321829	-0.580337	0.391363	0.306982	-0.517296	0.438198	0.459959
YDR199W	YDR199W	4	0.602081	0.614976	0.232461	-0.740256	0.742295	0.446528	-0.927961	0.663822	0.380098
YDR200C	VPS64	4	-1.33337	0.228422	0.0131474	1.74522	0.222346	0.0210272	2.20348	0.279636	0.0180229
YDR204W	COQ4	4	-2.77197	0.137956	0.00214601	5.78889	0.683008	0.0202585	6.79163	0.704889	0.0134817
YDR206W	EBS1	4	0.494382	0.187883	0.0481913	0.747417	0.320196	0.170635	0.635198	0.365852	0.297333
YDR209C	YDR209C	4	2.29073	1.21727	0.0840976	-0.414844	1.13541	0.78631	-1.09305	1.07912	0.52834
YDR210W	YDR210W	4	-0.456221	0.637735	0.348152	-0.271051	0.681445	0.768339	-0.131624	0.561136	0.887195
YDR213W	UPC2	4	-0.935712	0.783373	0.174676	-0.88452	1.18857	0.568489	-0.621084	1.32293	0.774649
YDR214W	AHA1	4	0.657876	0.382986	0.0980792	0.059024	0.703166	0.95647	-0.121781	0.618825	0.901868
YDR216W	ADR1	4	0.126045	0.415693	0.665558	0.0633743	0.317018	0.883576	0.0401819	0.32694	0.942829
YDR217C	RAD9	4	0.416323	0.376014	0.194699	-0.552289	0.866212	0.630624	-0.67948	0.957493	0.663823
YDR218C	SPR28	4	0.348853	0.359575	0.2351	-0.142089	0.606649	0.865387	-0.237279	0.572913	0.797494
YDR219C	MFB1	4	0.5737	0.340997	0.101766	0.376372	1.0092	0.781113	0.229793	1.10186	0.896769
YDR221W	GTB1	4	0.854339	0.91497	0.248032	0.377595	0.81784	0.728921	0.147949	0.887797	0.915893
YDR222W	YDR222W	4	0.336422	0.537772	0.399598	-0.483431	0.817969	0.656605	-0.584943	0.765125	0.640561
YDR228C	PCF11	4	1.13768	1.28744	0.265995	0.162297	0.669856	0.859184	-0.15756	0.809349	0.901868
YDR229W	IVY1	4	0.540125	0.418742	0.155777	0.509647	0.755418	0.609776	0.376915	0.749769	0.766205
YDR231C	COX20	4	-2.62589	0.223375	0.0043033	5.0364	0.440708	0.0127341	5.97384	0.43173	0.00853685
YDR233C	RTN1	4	0.533289	1.29875	0.56191	0.369044	0.38036	0.455871	0.234217	0.340089	0.673651
YDR239C	YDR239C	4	0.848253	0.613765	0.13976	0.311274	0.798892	0.77188	0.0814874	0.69655	0.946382
YDR242W	AMD2	4	0.786544	0.398003	0.0773428	-0.262755	0.643567	0.763583	-0.491089	0.590433	0.610476
YDR244W	PEX5	4	0.576018	0.920545	0.399598	-0.50129	0.334456	0.302674	-0.674274	0.506526	0.400861
YDR245W	MNN10	1	1.65414	NA	NA	0.787708	NA	NA	0.333245	NA	NA
YDR247W	VHS1	4	-0.915987	0.584319	0.112776	0.373438	0.66103	0.667445	0.667896	0.583222	0.475136
YDR248C	YDR248C	4	-0.00469364	0.45152	0.988393	-0.442324	0.529265	0.51825	-0.441621	0.631815	0.666234
YDR249C	YDR249C	4	0.431992	0.704219	0.408316	0.214187	0.293507	0.575459	0.104818	0.464351	0.891142
YDR252W	BTT1	4	-0.198661	0.497533	0.573517	-0.240526	0.814621	0.826714	-0.176473	0.702991	0.876952
YDR254W	CHL4	4	0.0503356	1.22227	0.954852	-0.670761	0.746573	0.485376	-0.693047	0.436459	0.327736
YDR255C	RMD5	4	0.128148	0.115971	0.195112	-0.196189	1.02201	0.889225	-0.22761	1.043	0.894955
YDR257C	RKM4	4	0.206657	0.360744	0.434969	-0.445091	0.637123	0.594787	-0.507054	0.549239	0.56505
YDR259C	YAP6	4	-0.218473	0.533357	0.562919	0.390794	0.20461	0.225075	0.479214	0.157638	0.121496
YDR261C	EXG2	4	1.19704	0.20724	0.0134527	-0.164533	0.635981	0.851232	-0.511545	0.703638	0.653215
YDR265W	PEX10	4	0.344503	0.507519	0.368092	-0.0575811	0.808474	0.963836	-0.149007	0.886151	0.915686
YDR270W	CCC2	4	-1.15668	0.0941688	0.00402802	-0.421777	0.78295	0.68192	-0.0793481	0.830662	0.954826
YDR272W	GLO2	4	-0.325541	0.600462	0.457037	-0.164735	0.603941	0.840224	-0.060889	0.466359	0.937442
YDR275W	BSC2	4	0.947395	0.738713	0.157232	0.313684	0.976614	0.813473	0.0546102	0.810828	0.965021
YDR276C	PMP3	4	0.202028	0.0829393	0.0548848	3.64741	0.441745	0.0205114	3.70674	0.445637	0.0169597
YDR277C	MTH1	4	-0.329233	0.509309	0.386837	-0.472649	1.02936	0.729735	-0.376733	0.96475	0.810792
YDR278C	YDR278C	4	0.190075	0.208506	0.255481	0.334085	1.19353	0.835092	0.299865	1.21869	0.88011
YDR279W	RNH202	4	-0.212487	0.404501	0.469274	-0.613058	0.419638	0.309729	-0.555827	0.375021	0.355223
YDR281C	PHM6	4	-0.935165	0.251969	0.0268228	0.166138	1.36467	0.933513	0.4602	1.43627	0.845911
YDR282C	YDR282C	4	-0.805491	0.323387	0.0525913	-0.591274	0.200341	0.119256	-0.357806	0.144392	0.174925
YDR283C	GCN2	4	-0.682385	0.49306	0.139374	-0.177621	0.877503	0.881898	0.0315145	1.04254	0.985669
YDR284C	DPP1	4	0.386588	0.124315	0.0366497	0.043942	1.0645	0.980642	-0.0569713	1.12849	0.973474
YDR287W	INM2	4	-0.478704	0.438321	0.198522	-0.33458	0.530615	0.635992	-0.190358	0.594363	0.845911
YDR291W	HRQ1	4	0.591145	0.0319922	0.00223798	0.234638	0.42811	0.676585	0.0787398	0.444318	0.909877
YDR294C	DPL1	4	-1.32284	0.42132	0.0359159	-0.409681	0.690649	0.655172	-0.0176971	0.603733	0.986268
YDR295C	HDA2	4	2.96162	0.455997	0.0110129	1.25603	0.670902	0.227306	0.428121	0.821648	0.754928
YDR304C	CPR5	4	-0.125843	0.285105	0.536923	-0.901696	1.10191	0.528388	-0.878581	1.12966	0.635616
YDR306C	YDR306C	4	-0.564204	0.195893	0.0412291	-0.54508	0.713332	0.557374	-0.381708	0.789965	0.768383
YDR307W	PMT7	4	0.22461	0.258888	0.272655	-0.0829027	1.08126	0.960621	-0.139568	1.1551	0.944137
YDR312W	SSF2	4	-0.449776	0.406639	0.194872	-0.90542	1.10712	0.528522	-0.786492	1.12004	0.66557
YDR313C	PIB1	4	-0.359206	0.450464	0.303817	0.0143256	0.728228	0.990653	0.133387	0.756672	0.909877
YDR314C	RAD34	4	-0.510311	0.457652	0.193177	-0.486317	0.722325	0.610683	-0.337181	0.713246	0.771662
YDR315C	IPK1	1	-6.65901	NA	NA	0.255594	NA	NA	2.24721	NA	NA
YDR316W	OMS1	4	1.68258	0.240674	0.00979693	1.3265	0.582148	0.175391	0.879403	0.540881	0.316762
YDR317W	HIM1	4	0.235633	0.229866	0.216988	0.38895	0.850698	0.731734	0.342847	0.862858	0.810112
YDR318W	MCM21	4	1.07478	0.860834	0.16384	0.881022	0.48359	0.236786	0.600853	0.57255	0.513531
YDR319C	YFT2	4	-0.380637	0.236908	0.108782	0.431809	0.428227	0.44308	0.569451	0.449248	0.424122
YDR329C	PEX3	4	-0.978623	0.466704	0.0709092	0.00560032	1.12307	0.997536	0.307827	1.03712	0.857257
YDR332W	IRC3	4	-0.933985	0.77771	0.173524	1.13175	0.826749	0.333621	1.45376	0.722404	0.244564
YDR336W	YDR336W	4	0.626922	0.62519	0.224229	0.24687	0.599944	0.760648	0.080736	0.744686	0.949459
YDR338C	YDR338C	4	-0.448654	0.257298	0.0957431	-0.844771	0.387969	0.186306	-0.724397	0.468462	0.341223
YDR344C	YDR344C	4	-0.0531281	0.29984	0.803438	0.0472923	0.435816	0.940198	0.0766848	0.485318	0.919049
YDR345C	HXT3	4	-1.36067	0.429322	0.0354965	-0.638517	0.610232	0.42888	-0.242034	0.681319	0.826016
YDR346C	SVF1	4	0.737867	0.443933	0.103703	-0.0385997	0.611526	0.97176	-0.245952	0.528041	0.776113
YDR348C	PAL1	4	0.946313	0.460622	0.0731868	2.35974	0.746196	0.108137	2.16095	0.801051	0.148775
YDR349C	YPS7	4	0.648776	0.266289	0.0548848	0.751801	0.404217	0.229539	0.593992	0.462237	0.416699
YDR350C	ATP22	4	-7.30201	0.405378	0.00235386	2.85492	0.797281	0.0863264	5.11311	0.855123	0.0316565
YDR351W	SBE2	4	1.45662	0.633221	0.0604719	0.108159	1.20413	0.954081	-0.307728	1.16999	0.874847
YDR352W	YPQ2	4	-0.519202	0.328021	0.111119	-0.844144	1.44503	0.65765	-0.702862	1.54652	0.778844
YDR354W	TRP4	4	-0.158225	0.488442	0.645064	-0.17703	0.573274	0.819533	-0.12309	0.672492	0.905685
YDR358W	GGA1	4	0.768543	0.537144	0.131741	-0.67282	0.375983	0.243176	-0.907841	0.235262	0.0778562
YDR360W	OPI7	4	0.678747	0.431586	0.112211	0.330713	0.184889	0.243176	0.15169	0.292489	0.756704
YDR363W	ESC2	4	-1.83479	0.432979	0.0215612	0.702368	1.31418	0.684946	1.27854	1.27609	0.534266
YDR368W	YPR1	4	-0.803493	0.302906	0.0476885	-0.680403	0.531062	0.358115	-0.450139	0.499276	0.576399
YDR369C	XRS2	4	-4.47536	0.13511	0.0012546	1.12443	0.444272	0.151416	2.49489	0.444043	0.0359293
YDR370C	DXO1	4	0.848381	0.454215	0.085224	0.496202	0.930124	0.685761	0.271797	0.878549	0.853869
YDR371W	CTS2	4	-0.87321	0.422368	0.0723494	-1.01393	0.612775	0.268916	-0.772796	0.563917	0.385018
YDR372C	VPS74	4	2.22213	0.66361	0.0324154	1.51859	0.393233	0.0782375	0.917351	0.293409	0.115535
YDR374C	PHO92	4	0.11541	0.381078	0.665558	0.215115	1.01507	0.877382	0.199518	0.93253	0.896056
YDR375C	BCS1	4	-5.30607	0.553831	0.00582269	3.44086	0.523001	0.0300097	5.12519	0.665514	0.0182774
YDR379W	RGA2	4	-0.248895	0.565758	0.537958	-0.340913	0.92518	0.783416	-0.264926	0.816698	0.84452
YDR384C	ATO3	4	-0.302039	0.136546	0.0648741	0.258499	0.446616	0.659504	0.367788	0.461492	0.625235
YDR385W	EFT2	4	-4.16103	0.219718	0.0021901	-0.544746	0.358421	0.297093	0.68372	0.375366	0.279626
YDR386W	MUS81	4	-0.568082	0.292972	0.0798784	0.0243128	0.557095	0.980503	0.205519	0.566927	0.821763
YDR387C	YDR387C	4	-0.15191	0.103485	0.125945	-0.729741	0.488829	0.302848	-0.693868	0.50792	0.385364
YDR388W	RVS167	3	2.58892	0.494797	0.0451457	9.38531	0.365345	0.0206891	8.90598	0.274819	0.0134817
YDR389W	SAC7	4	0.316919	0.45028	0.354306	0.217731	0.913191	0.861117	0.142541	0.860956	0.916477
YDR391C	YDR391C	4	-0.202476	0.33849	0.418909	-0.118338	0.608865	0.886324	-0.0495742	0.554954	0.95795
YDR392W	SPT3	3	4.96017	0.218653	0.00887295	2.1345	0.213348	0.0672532	0.740529	0.218835	0.24625
YDR393W	SHE9	3	-1.80357	0.214959	0.0258442	1.70656	1.28779	0.457581	2.30291	1.3344	0.453245
YDR395W	SXM1	4	3.31929	0.459084	0.00944048	-0.0454481	0.277965	0.90597	-1.01741	0.315663	0.110019
YDR400W	URH1	4	-0.283521	0.506748	0.444813	-0.737599	1.26524	0.65765	-0.662984	1.25221	0.753702
YDR401W	YDR401W	4	0.038803	0.69554	0.940047	0.208009	0.454279	0.730985	0.214889	0.587296	0.820889
YDR402C	DIT2	4	1.08629	0.464019	0.0587821	-0.373945	1.13977	0.808051	-0.694298	1.0935	0.705883
YDR403W	DIT1	4	1.2044	0.281146	0.0212134	0.00671872	0.916015	0.995927	-0.337453	1.02066	0.840095
YDR406W	PDR15	4	0.0698562	0.254419	0.694747	-0.42333	0.450132	0.469345	-0.444146	0.418044	0.509593
YDR409W	SIZ1	4	-1.22919	0.335137	0.0273745	-0.527896	0.470785	0.405745	-0.167106	0.467647	0.825098
YDR411C	DFM1	4	0.0852304	0.786275	0.879037	0.548109	0.997629	0.676338	0.551207	0.939075	0.723048
YDR414C	ERD1	4	3.1341	0.759868	0.0224235	1.1046	0.6606	0.265242	0.221179	0.813954	0.868076
YDR415C	YDR415C	4	1.10093	0.280397	0.0247517	-0.355232	0.657961	0.680993	-0.679372	0.64714	0.513531
YDR419W	RAD30	4	-0.22536	0.249327	0.258076	-0.189455	0.636212	0.82502	-0.116	0.624837	0.904725
YDR420W	HKR1	4	0.47227	0.18677	0.0514112	-0.288044	1.25954	0.869668	-0.424057	1.25712	0.833749
YDR421W	ARO80	4	-0.894897	0.504989	0.0931632	-0.609408	1.16367	0.694415	-0.349997	1.15879	0.855013
YDR422C	SIP1	4	-0.504408	0.21719	0.0597559	-0.312002	0.809716	0.77481	-0.159506	0.832024	0.902266
YDR423C	CAD1	4	-0.483469	0.211701	0.0613084	-0.792893	0.316482	0.15317	-0.66069	0.371208	0.289631
YDR425W	SNX41	4	-0.305385	0.260439	0.179403	0.3051	0.620289	0.709992	0.416745	0.664624	0.707002
YDR426C	YDR426C	4	-2.0366	0.380456	0.0150674	-0.37103	1.33493	0.835954	0.233446	1.44367	0.917812
YDR428C	BNA7	4	0.503915	0.523762	0.237727	0.561555	0.766938	0.574756	0.441067	0.925471	0.770539
YDR430C	CYM1	4	-0.174995	0.565299	0.659156	-0.270539	0.780672	0.797263	-0.214373	0.741011	0.861394
YDR431W	YDR431W	4	-0.222731	0.103798	0.067839	-0.368938	0.78221	0.722522	-0.30152	0.777567	0.810792
YDR435C	PPM1	4	1.79096	0.454143	0.0246372	0.00684575	1.09502	0.996831	-0.511014	1.03143	0.766205
YDR438W	THI74	4	1.79381	0.779509	0.0604719	0.890501	0.498099	0.243176	0.397692	0.44919	0.586197
YDR439W	LRS4	4	-1.93291	1.35235	0.131878	1.61222	0.258965	0.0324679	2.2441	0.33665	0.025328
YDR440W	DOT1	4	-0.734973	0.325937	0.0628016	-0.680784	0.628653	0.418066	-0.47082	0.623382	0.64326
YDR441C	APT2	4	-1.2184	0.53576	0.0618271	-0.366002	1.08605	0.801376	-0.00366198	1.02813	0.999016
YDR446W	ECM11	4	0.0163802	0.499633	0.964848	0.779478	0.768331	0.441055	0.809743	0.817397	0.537707
YDR447C	RPS17B	4	-3.24262	0.234084	0.00336566	-1.13744	0.488802	0.170636	-0.198299	0.53916	0.820667
YDR451C	YHP1	4	0.478948	0.509499	0.245492	-0.451875	1.27016	0.792787	-0.594667	1.24778	0.770539
YDR452W	PPN1	4	0.864216	0.76112	0.188285	0.0106528	1.16607	0.994891	-0.23267	1.34252	0.911371
YDR453C	TSA2	4	1.68892	1.4091	0.173903	0.369618	0.720394	0.702245	-0.107395	0.408862	0.874847
YDR456W	NHX1	4	-2.30035	0.357091	0.0110811	-0.429992	0.646244	0.615193	0.250856	0.57748	0.789149
YDR457W	TOM1	4	0.850756	0.503677	0.100932	-0.190349	1.06599	0.897737	-0.435577	1.22493	0.826016
YDR458C	HEH2	4	-1.63408	0.502563	0.0339363	0.913335	0.520874	0.249749	1.43626	0.467499	0.118859
YDR459C	PFA5	4	0.814713	0.458573	0.0929101	-0.159431	0.553607	0.831095	-0.39308	0.554643	0.663823
YDR463W	STP1	4	-0.719982	0.361067	0.0762673	-0.269932	0.905186	0.825011	-0.0523679	0.892034	0.971187
YDR465C	RMT2	4	0.407332	0.714633	0.437226	0.0458399	0.433622	0.941783	-0.0611605	0.294773	0.897019
YDR466W	PKH3	4	0.508794	0.232876	0.0662625	0.122579	0.38834	0.817115	-0.0122177	0.356679	0.983645
YDR467C	YDR467C	4	-0.199478	0.211084	0.243531	-0.124973	0.777826	0.907751	-0.0572915	0.800613	0.964514
YDR469W	SDC1	4	2.09637	0.368972	0.0137077	3.37651	0.273638	0.011806	2.86695	0.291995	0.0130615
YDR470C	UGO1	4	2.31789	0.24375	0.00583927	0.744567	1.53936	0.715355	0.092293	1.59964	0.971187
YDR471W	RPL27B	4	1.45617	0.734831	0.0771082	-0.413642	0.440813	0.469345	-0.844688	0.334132	0.168381
YDR475C	JIP4	4	0.716065	0.646403	0.19457	-0.789065	0.51372	0.295309	-1.01195	0.649356	0.337795
YDR479C	PEX29	4	0.763726	0.672076	0.188043	0.859762	0.964249	0.489551	0.671078	1.0825	0.711846
YDR480W	DIG2	4	0.366205	0.675282	0.457037	-0.00204205	0.35285	0.997073	-0.0982673	0.373828	0.874847
YDR481C	PHO8	4	-0.403238	0.305784	0.151504	-0.490193	0.855296	0.661721	-0.372878	0.850176	0.787424
YDR482C	CWC21	4	1.18646	0.395277	0.0385401	-0.389109	0.995853	0.77155	-0.739568	0.945895	0.633072
YDR485C	VPS72	4	-0.985593	0.266712	0.027029	0.856996	1.61545	0.688601	1.18624	1.61148	0.649213
YDR486C	VPS60	4	0.0444531	0.286068	0.828059	0.203385	1.01241	0.883487	0.208456	0.966104	0.895325
YDR488C	PAC11	4	1.01405	1.0914	0.249675	4.14035	0.561044	0.0234197	3.97367	0.326526	0.0104248
YDR491C	YDR491C	4	-0.240038	0.291983	0.292454	0.105239	0.578149	0.895836	0.191677	0.677325	0.863899
YDR494W	RSM28	4	-0.850468	0.283664	0.0386271	-0.00755865	0.321423	0.988333	0.256333	0.314384	0.620199
YDR497C	ITR1	4	1.12359	0.714962	0.112321	0.244791	0.966306	0.854421	-0.0684747	1.01868	0.965021
YDR500C	RPL37B	3	-2.48968	0.885906	0.0955311	-0.760023	0.861982	0.606198	-0.0327827	0.625194	0.976761
YDR503C	LPP1	4	0.296185	0.309379	0.239429	-0.700001	0.665827	0.427846	-0.795945	0.725708	0.492534
YDR504C	SPG3	4	0.116315	0.524718	0.752396	0.0795029	0.528606	0.914273	0.0596641	0.67306	0.958544
YDR508C	GNP1	4	-0.904675	0.399129	0.0622474	-0.586346	0.492243	0.381868	-0.323363	0.454435	0.663425
YDR509W	YDR509W	4	6.18859	1.41004	0.0205271	5.00607	0.966907	0.046486	3.33249	0.659625	0.0448814
YDR511W	SDH7	4	0.567274	0.475568	0.174897	-0.205314	0.963807	0.876173	-0.367036	0.993329	0.820667
YDR512C	EMI1	4	2.90298	0.50656	0.0136645	3.34296	0.226449	0.00938933	2.59358	0.1142	0.00481485
YDR513W	GRX2	4	-0.41313	0.567714	0.341665	-0.411501	0.602339	0.604789	-0.28895	0.53978	0.750756
YDR514C	YDR514C	4	-0.461213	0.172581	0.0471723	-0.374395	1.41459	0.84642	-0.236518	1.49028	0.918934
YDR516C	EMI2	1	-0.385305	NA	NA	1.15623	NA	NA	1.31649	NA	NA
YDR517W	GRH1	4	0.0543854	0.16581	0.642035	-0.322949	0.533344	0.648361	-0.336242	0.568004	0.723048
YDR518W	EUG1	4	0.393866	0.110694	0.0289489	-0.670976	0.501916	0.341133	-0.794994	0.53376	0.354521
YDR519W	FPR2	4	-0.408026	0.104886	0.0251192	-0.393732	1.55463	0.854421	-0.272172	1.57291	0.911371
YDR520C	URC2	4	-0.619073	0.384022	0.108452	-1.28592	0.367628	0.0893061	-1.12801	0.29058	0.0771462
YDR522C	SPS2	4	0.323574	0.646103	0.487521	0.0221317	0.805512	0.987298	-0.0607613	0.994654	0.968984
YDR523C	SPS1	4	0.340882	0.528717	0.387667	-0.219051	0.312213	0.593268	-0.314137	0.389837	0.623214
YDR524C	AGE1	4	1.02258	0.694562	0.125356	0.728013	0.750955	0.456227	0.458817	0.763486	0.720281
YDR525W	API2	4	0.135184	0.452234	0.66918	0.474166	0.77919	0.647026	0.460305	0.774868	0.722938
YDR528W	HLR1	4	0.75866	0.475408	0.109912	0.127589	0.359698	0.792829	-0.0810505	0.264611	0.854154
YDR529C	QCR7	4	-3.53344	0.400095	0.00657447	4.94074	1.30931	0.0795385	6.14411	1.37525	0.0583881
YDR530C	APA2	4	0.11427	0.293696	0.583024	0.117336	0.204047	0.661412	0.0992119	0.25029	0.81045
YDR533C	HSP31	4	-0.485425	0.538357	0.258653	0.213162	1.29662	0.905517	0.375427	1.34286	0.86484
YEL001C	IRC22	4	-0.716411	0.219602	0.0337834	-0.531708	0.229811	0.171241	-0.322872	0.190436	0.305114
YEL003W	GIM4	4	-1.08972	0.210367	0.0159145	1.83188	0.223747	0.0205114	2.22053	0.284211	0.0180229
YEL004W	YEA4	4	-0.412787	0.175084	0.0580543	0.118339	1.02987	0.937455	0.256315	1.08499	0.885639
YEL005C	VAB2	4	-0.866596	0.453824	0.0822104	-0.918876	0.332142	0.130605	-0.676914	0.349758	0.256991
YEL006W	YEA6	4	0.94404	0.7005	0.145719	-0.277539	1.12263	0.857215	-0.552944	1.33502	0.797494
YEL014C	YEL014C	4	-0.217026	0.433827	0.487767	-0.0119049	1.19925	0.994759	0.0642861	1.22517	0.97294
YEL016C	NPP2	4	0.828496	0.260688	0.0354344	-0.14265	0.798803	0.897737	-0.379888	0.793207	0.769673
YEL017W	GTT3	4	1.53973	0.264689	0.0132522	0.389038	0.414811	0.469345	-0.0432293	0.478886	0.956806
YEL025C	YEL025C	4	0.28547	0.676845	0.552848	0.844552	0.682469	0.370377	0.797043	0.534073	0.354521
YEL028W	YEL028W	4	0.838369	0.534379	0.112656	0.229541	0.535532	0.750074	0.000286553	0.671019	0.999372
YEL037C	RAD23	4	2.55512	0.322654	0.00804193	-0.10604	0.452152	0.865387	-0.853489	0.452408	0.267226
YEL038W	UTR4	4	-0.355072	0.442224	0.301204	-0.421181	0.343679	0.371893	-0.316105	0.350344	0.576399
YEL039C	CYC7	4	0.635928	0.432559	0.125662	-0.373249	0.411719	0.482125	-0.560222	0.37723	0.354521
YEL040W	UTR2	4	-1.06198	0.235296	0.0195202	-0.286071	0.836746	0.800662	0.0322908	0.802536	0.978676
YEL048C	TCA17	4	1.07954	0.391163	0.0448508	-0.179333	0.494642	0.789036	-0.491984	0.519	0.555611
YEL049W	PAU2	4	-0.109287	0.19594	0.446051	-0.30269	1.22137	0.856975	-0.266924	1.21678	0.894955
YEL052W	AFG1	4	-0.1192	0.672603	0.803438	0.405233	0.861916	0.723708	0.46468	0.759489	0.716899
YEL059W	HHY1	3	0.618328	0.0450194	0.0151703	0.51277	0.264489	0.349367	0.356972	0.279133	0.557563
YEL071W	DLD3	4	-0.083389	0.678262	0.862805	0.64424	0.626375	0.435585	0.700086	0.516216	0.390396
YEL072W	RMD6	4	0.360209	0.429946	0.284867	0.277651	0.574961	0.715631	0.191398	0.596323	0.845911
YER005W	YND1	4	1.0828	0.379676	0.0421255	0.184589	1.17612	0.911127	-0.118363	1.18768	0.954383
YER007C-A	TMA20	4	-1.54867	0.288997	0.0150674	-0.167421	0.700928	0.860933	0.298535	0.771445	0.810792
YER007W	PAC2	2	0.999357	0.0147701	0.0319935	-0.518587	1.09213	0.840224	-0.817436	1.12851	0.810792
YEL047C	FRD1	4	-0.505874	1.26336	0.572339	-0.244117	0.344064	0.589056	-0.131125	0.562024	0.888503
YER001W	MNN1	4	-0.00654151	0.397041	0.981484	0.302216	0.143995	0.198893	0.25977	0.231291	0.485001
YER002W	NOP16	4	-0.584976	0.385144	0.118633	-1.2702	1.24684	0.440808	-1.17435	1.20768	0.547634
YER016W	BIM1	4	-1.50566	0.357919	0.0216606	2.89583	0.345543	0.020375	3.50825	0.478263	0.0203892
YER019C-A	SBH2	4	1.64782	0.359542	0.0188754	0.51645	0.77633	0.615193	-0.111921	0.93319	0.944137
YER019W	ISC1	1	-3.06187	NA	NA	6.61408	NA	NA	7.95189	NA	NA
YER020W	GPA2	4	-4.51937	0.451405	0.00552712	-0.765476	0.402335	0.225075	0.768904	0.341128	0.207005
YER024W	YAT2	4	0.877156	0.291466	0.0384426	0.853482	0.454752	0.227306	0.517475	0.475921	0.496212
YER027C	GAL83	4	-1.42504	0.547749	0.0487862	-0.386413	0.646174	0.653328	0.0510852	0.586591	0.959027
YER028C	MIG3	4	0.231747	0.402657	0.433198	-0.0527238	0.631748	0.956652	-0.196713	0.79463	0.878406
YER030W	CHZ1	4	-0.522046	0.293465	0.0926843	-0.691492	0.36411	0.225075	-0.592565	0.455661	0.410046
YER033C	ZRG8	4	1.02401	0.295152	0.0305321	0.491024	0.792895	0.640826	0.0860481	0.908844	0.955594
YER035W	EDC2	4	-0.0319057	0.482721	0.928661	-0.103982	1.35488	0.960621	-0.155354	1.4226	0.948707
YER037W	PHM8	4	-0.608463	0.735087	0.28959	-0.91953	0.3779	0.159591	-0.799636	0.543517	0.358884
YER038W-A	YER038W-A	4	-0.581047	0.835625	0.358834	-0.623667	0.920977	0.609236	-0.500488	0.944097	0.753702
YER039C	HVG1	4	0.292481	0.257688	0.188359	-0.771606	1.017	0.560124	-0.96941	1.13567	0.598997
YER041W	YEN1	4	0.0205949	0.474879	0.952801	0.395181	0.41784	0.468236	0.347101	0.599003	0.727241
YER042W	MXR1	4	0.244934	0.466612	0.469411	-0.0673033	1.06031	0.971571	-0.216687	0.983095	0.893742
YER044C-A	MEI4	4	-0.271688	0.181675	0.122016	-0.338793	0.98368	0.799031	-0.314299	1.00972	0.853016
YER045C	ACA1	4	0.683537	0.748031	0.254555	0.783425	0.740672	0.427263	0.513992	0.959937	0.750756
YER046W-A	YER046W-A	4	-0.29279	0.255884	0.186552	0.218475	0.767115	0.832372	0.275336	0.726995	0.818925
YER047C	SAP1	4	-0.993556	0.401411	0.0531092	0.54784	0.552334	0.448273	0.871565	0.441073	0.251018
YER048C	CAJ1	4	1.45283	0.310262	0.0182254	4.20384	0.575217	0.0235557	3.80956	0.68416	0.0366917
YER049W	TPA1	4	0.844712	0.505174	0.102775	-0.341433	0.778869	0.744121	-0.718877	0.793595	0.575679
YER051W	JHD1	4	0.0642409	0.167977	0.589922	-0.214005	0.17199	0.369205	-0.304873	0.171304	0.289631
YER052C	HOM3	4	-0.957312	0.192045	0.0166531	1.14369	0.338545	0.0950212	1.48086	0.299006	0.0468645
YER053C	PIC2	4	0.139334	0.328525	0.551064	-0.357755	1.09538	0.808851	-0.482041	1.05633	0.778047
YER054C	GIP2	4	1.07886	0.227064	0.0177551	0.498568	0.674516	0.570941	0.074185	0.732251	0.954383
YER056C	FCY2	4	0.461381	0.286899	0.108705	0.573507	0.559661	0.43775	0.374703	0.570056	0.69237
YER057C	HMF1	4	-0.0212388	0.822988	0.971562	-0.592915	0.893117	0.615493	-0.66986	0.645129	0.516899
YER058W	PET117	4	-3.4584	0.23038	0.00306428	6.60998	0.721732	0.0175634	8.09032	0.723952	0.0108153
YER060W	FCY21	4	-0.568535	0.610046	0.248638	-0.649218	0.949217	0.604288	-0.531679	1.19461	0.782979
YER060W-A	FCY22	4	0.294032	0.224299	0.152706	-0.130248	0.707467	0.893987	-0.3001	0.77008	0.810792
YER062C	GPP2	4	0.717547	0.2143	0.0324154	-1.12643	0.68594	0.270602	-1.493	0.724834	0.234861
YER065C	ICL1	4	-1.46178	0.152437	0.00582269	0.241791	0.12428	0.220216	0.720437	0.134467	0.039783
YER066C-A	YER066C-A	4	-0.43068	0.153243	0.043329	0.147876	1.32071	0.939576	0.251228	1.36976	0.905685
YER067C-A	YER067C-A	4	-0.202096	0.479164	0.552848	0.0196163	1.10484	0.992114	0.0349944	1.21101	0.986516
YER071C	TDA2	4	0.517411	0.275099	0.0841166	0.321822	0.659549	0.711293	0.0916638	0.638245	0.930767
YER072W	VTC1	4	1.15043	0.299651	0.0255899	0.510309	1.60618	0.81528	0.0606895	1.65144	0.981378
YER073W	ALD5	4	0.235953	0.377092	0.399598	0.792435	1.17754	0.610683	0.684499	1.10693	0.711846
YER075C	PTP3	4	-0.0358157	1.21493	0.968286	0.184806	1.25798	0.917442	0.147678	1.4021	0.952102
YER079W	YER079W	4	-0.695558	0.096472	0.00944048	-0.0551319	0.507513	0.940198	0.134534	0.495461	0.868076
YER080W	AIM9	4	0.403333	0.975677	0.559611	0.115416	0.821985	0.921222	-0.0828578	0.792737	0.95248
YER081W	SER3	4	0.814282	0.451988	0.0908907	-1.26191	0.844225	0.302848	-1.66932	0.776769	0.224578
YER084W	YER084W	4	11.8581	0.178418	0.00080811	7.05127	0.379351	0.00737065	3.03844	0.349243	0.0157204
YER085C	YER085C	4	1.24994	0.582486	0.067839	0.464457	0.507409	0.478374	-0.0230183	0.491242	0.975242
YER086W	ILV1	4	-2.58239	0.349328	0.00908562	-0.531497	0.385974	0.330978	0.316113	0.416074	0.640561
YER087C-A	YER087C-A	4	0.197605	0.333215	0.422119	-0.015969	0.896219	0.992114	-0.146036	0.817646	0.908875
YFL011W	HXT10	4	0.0985717	0.545467	0.799311	0.546732	1.33906	0.763583	0.477322	1.27176	0.820349
YFL015C	YFL015C	4	-0.00200017	0.427894	0.995209	-0.488625	1.6389	0.825011	-0.567858	1.81501	0.851424
YFL020C	PAU5	4	-1.36052	0.290722	0.0182254	-0.525783	1.24466	0.752321	-0.117702	1.39238	0.959154
YFL021W	GAT1	4	0.420695	0.208142	0.0748452	-0.0270641	0.790883	0.983849	-0.23792	0.831562	0.862276
YFL025C	BST1	4	-0.934652	0.79173	0.177376	-0.0985866	1.96564	0.97762	0.175203	2.0528	0.959027
YFL027C	GYP8	4	-0.495367	0.269326	0.0877239	0.0323044	0.584529	0.974917	0.153802	0.664385	0.889572
YFL028C	CAF16	4	1.15024	0.563869	0.0739962	0.812573	0.39257	0.20247	0.376455	0.249217	0.35019
YFL030W	AGX1	4	1.38901	0.621823	0.0638285	0.331458	0.596385	0.673284	-0.211985	0.816202	0.874847
YFL032W	YFL032W	3	-0.409461	1.02974	0.644865	0.696089	1.24984	0.739796	0.816172	0.975547	0.69805
YFL034W	YFL034W	4	-0.145986	0.281229	0.473675	-0.2096	0.465625	0.738096	-0.224607	0.460193	0.768227
YFL040W	YFL040W	4	1.78079	0.591999	0.0384543	-0.129239	0.234537	0.676338	-0.834171	0.30536	0.14569
YFL041W	FET5	4	-1.34216	0.388129	0.0307248	-0.319529	0.936444	0.800693	0.0911141	1.10575	0.959423
YFL043C	YFL043C	4	0.0145892	0.430193	0.963625	-0.193191	0.582656	0.805667	-0.265263	0.634859	0.795612
YFL044C	OTU1	4	-0.827163	0.292795	0.0427598	-0.408235	1.2735	0.813539	-0.186898	1.23011	0.922905
YFL046W	FMP32	4	0.376951	0.524377	0.34612	-0.0313789	0.942393	0.984254	-0.226682	0.841898	0.870539
YFL047W	RGD2	4	-0.573804	0.523799	0.197598	0.0901859	0.955123	0.949582	0.242488	0.854005	0.863488
YFL048C	EMP47	4	-0.755316	1.11191	0.367939	-0.479501	0.895892	0.68413	-0.28719	0.597125	0.768634
YFL049W	SWP82	4	1.08335	0.379118	0.0420079	0.247064	0.583959	0.752321	-0.190113	0.665506	0.862503
YFL050C	ALR2	4	0.833005	0.471653	0.0936972	0.511443	0.397663	0.358115	0.176123	0.370782	0.771097
YFL051C	YFL051C	4	0.825065	0.523269	0.111764	0.64764	0.627267	0.434571	0.321232	0.588424	0.741892
YFL052W	YFL052W	4	0.763332	0.54983	0.138694	-0.408257	0.558804	0.575411	-0.759381	0.57237	0.401949
YFL053W	DAK2	4	-0.193042	0.287297	0.372394	-0.354915	1.21389	0.828453	-0.359444	1.26753	0.8635
YFL054C	YFL054C	4	0.42565	0.450778	0.243719	0.0249347	1.54961	0.993049	-0.185393	1.61023	0.947867
YFL055W	AGP3	4	0.207805	0.337825	0.407105	-0.785856	0.607813	0.357712	-0.953816	0.597741	0.325712
YFL056C	AAD6	4	0.0200719	0.586515	0.963392	0.656012	0.949741	0.598906	0.619714	1.10355	0.73296
YFR006W	YFR006W	4	0.332989	1.17493	0.685664	0.0530406	0.987095	0.976284	-0.122687	1.00397	0.943463
YFR007W	YFH7	4	-1.03341	0.161338	0.0111842	-0.208291	0.566654	0.78455	0.0961676	0.59636	0.917954
YFR009W	GCN20	4	-1.90734	0.48476	0.0247162	-0.649705	1.13375	0.661721	-0.0503161	1.18538	0.977787
YFR011C	MIC19	4	0.706488	0.273657	0.0493873	1.15881	0.796405	0.310121	0.897797	0.80537	0.487609
YFR012W	DCV1	4	0.710932	0.451543	0.112098	-0.55359	0.997498	0.673284	-0.892314	1.17658	0.641193
YFR013W	IOC3	4	0.359491	0.863244	0.556838	-0.0506217	0.852566	0.973136	-0.240496	0.66531	0.821763
YFR014C	CMK1	4	1.41128	0.346421	0.0231116	0.406053	0.54009	0.564309	-0.142088	0.625452	0.891142
YFR015C	GSY1	4	0.435134	0.636659	0.365074	-0.259491	0.151559	0.255008	-0.485875	0.233061	0.232114
YFR016C	YFR016C	4	-1.44823	0.595332	0.0549552	-1.42496	0.377101	0.0795385	-1.02528	0.423225	0.180053
YFR017C	IGD1	4	2.10951	0.863987	0.05468	0.732047	0.90773	0.535166	-0.0529139	0.753649	0.964588
YFR018C	YFR018C	4	1.69688	0.973714	0.0958313	0.712639	0.733496	0.455871	0.075332	0.521995	0.930447
YFR020W	YFR020W	4	-0.995699	0.151509	0.0108322	-0.0897192	0.557952	0.907751	0.206437	0.561619	0.820667
YFR021W	ATG18	4	-4.10194	0.567541	0.00944048	-1.98258	1.03929	0.225075	-0.652546	1.24548	0.75432
YFR022W	ROG3	4	0.873608	0.712853	0.168172	-0.246129	0.160867	0.295959	-0.629737	0.380444	0.310477
YFR023W	PES4	4	-0.0731213	0.102544	0.348741	-0.108976	0.946198	0.937398	-0.145735	1.01889	0.930767
YFR024C-A	LSB3	4	0.757269	0.834032	0.256885	0.425439	1.24754	0.800693	0.113556	1.36522	0.959423
YFR026C	ULI1	4	0.661445	1.3815	0.505455	0.300615	0.619928	0.714966	0.0176723	0.289912	0.968984
YGL002W	ERP6	4	0.333445	0.235123	0.133551	-0.135409	0.562253	0.859769	-0.319677	0.655928	0.768227
YGL003C	CDH1	4	-0.256912	0.24796	0.213749	6.10926	0.606276	0.0151233	6.41506	0.60038	0.0116976
YGL004C	RPN14	4	0.203278	0.144715	0.135984	0.0911197	1.07417	0.955793	-0.0362287	1.08182	0.984437
YGL007W	BRP1	4	-0.437506	0.591818	0.335727	0.248786	1.76345	0.921222	0.359081	1.64533	0.894955
YGL010W	MPO1	4	0.192403	0.424466	0.526521	-0.462441	0.503563	0.478289	-0.610481	0.613318	0.537124
YGL013C	PDR1	4	0.252402	0.37544	0.372231	-0.634946	1.28996	0.709992	-0.812249	1.26082	0.699803
YGL014W	PUF4	4	-2.03657	0.383435	0.0152236	-0.237003	1.1058	0.875597	0.427242	1.22938	0.827902
YGL015C	YGL015C	4	0.575908	0.472076	0.169141	0.228068	0.488941	0.726374	-0.0273122	0.662368	0.978345
YGL016W	KAP122	4	-3.07614	0.476934	0.0110811	-0.47403	0.456975	0.432397	0.553849	0.456889	0.447944
YGL017W	ATE1	4	0.135064	0.513834	0.708515	0.354899	0.30696	0.39314	0.263828	0.233287	0.480025
YGL019W	CKB1	4	-3.71468	0.388035	0.00582269	-1.86368	0.93871	0.214958	-0.667747	0.87731	0.640561
YGL021W	ALK1	4	0.214305	0.468074	0.522537	-0.123522	0.936162	0.925747	-0.264381	0.815916	0.84452
YGL023C	PIB2	4	-4.07349	0.299123	0.0034631	-1.35031	0.565742	0.164515	-0.00241141	0.673189	0.999016
YGL026C	TRP5	4	-0.371199	0.409645	0.257359	-0.793213	0.906961	0.496505	-0.753101	0.842264	0.579556
YGL027C	CWH41	4	2.12137	0.413464	0.0161487	2.61754	0.788527	0.0986942	1.91212	0.949381	0.244534
YGL028C	SCW11	4	1.72092	0.691011	0.0525913	1.12751	0.983134	0.396237	0.499995	0.88132	0.729124
YGL031C	RPL24A	4	-0.72601	0.490933	0.124609	-1.3789	1.62327	0.51114	-1.23712	1.60187	0.637633
YGL032C	AGA2	4	0.552451	0.278876	0.0771082	0.977909	0.533731	0.234825	0.764302	0.473839	0.320555
YGL033W	HOP2	4	0.461436	0.415174	0.193943	-0.329134	0.867338	0.777733	-0.568081	0.766459	0.647657
YGL034C	YGL034C	4	0.39142	0.49231	0.304936	-0.214336	0.968712	0.872533	-0.422978	0.895009	0.771662
YGL035C	MIG1	4	0.562113	0.355714	0.111344	-0.564679	0.309364	0.236008	-0.850331	0.335328	0.167665
YGL037C	PNC1	4	0.461721	0.167011	0.0447137	0.373411	0.809453	0.728925	0.16559	0.816703	0.899621
YGL039W	YGL039W	4	0.616505	0.416447	0.124509	0.491624	1.05539	0.726689	0.233347	1.10786	0.896056
YGL041C	YGL041C	4	-0.369732	0.192208	0.0809385	-0.352475	0.600578	0.65765	-0.2933	0.627961	0.775838
YGL043W	DST1	4	-0.850664	0.217743	0.0249036	0.535197	1.61156	0.805465	0.806929	1.62516	0.766205
YGL046W	YGL046W	4	-2.0024	0.446861	0.0198084	-0.242815	0.973762	0.856096	0.408874	0.984285	0.797089
YGL049C	TIF4632	4	0.817682	0.568904	0.130595	-0.0247655	0.484389	0.97762	-0.378405	0.583314	0.698338
YGL051W	MST27	4	0.323122	0.717231	0.52929	-0.196977	0.626993	0.817763	-0.380267	0.422293	0.577078
YGL053W	PRM8	4	-0.428741	0.274663	0.113486	-0.49951	0.333339	0.302674	-0.425632	0.330917	0.416332
YGL054C	ERV14	4	-3.37838	0.432242	0.00824498	-0.278341	0.978468	0.832655	0.86702	1.03267	0.605811
YGL056C	SDS23	4	0.478883	0.368222	0.154158	-0.537747	0.180152	0.118669	-0.792246	0.077991	0.0129747
YGL057C	GEP7	4	0.315349	0.344154	0.253641	0.224358	0.766306	0.828453	0.0625947	0.914731	0.964702
YGL058W	RAD6	1	-7.92449	NA	NA	1.01107	NA	NA	3.85001	NA	NA
YGL060W	YBP2	4	-2.3498	0.647832	0.0277896	0.468656	0.664569	0.591353	1.27701	0.587215	0.219922
YGL062W	PYC1	4	0.641744	0.235483	0.0455181	1.12066	0.364238	0.113315	0.881261	0.42506	0.233494
YGL063W	PUS2	4	0.869917	0.400768	0.0668228	0.176399	0.265253	0.615193	-0.187099	0.249441	0.644769
YGL067W	NPY1	4	0.142791	0.325281	0.538579	0.821734	0.606786	0.336146	0.748633	0.634978	0.459959
YGL071W	AFT1	4	-1.99407	0.384979	0.0159145	-0.494597	0.368096	0.338615	0.142905	0.429004	0.837235
YGL077C	HNM1	4	-0.275952	0.180842	0.117694	-0.426455	0.314663	0.335916	-0.404323	0.308044	0.40664
YGL078C	DBP3	4	-0.566695	0.500705	0.188794	-0.733122	1.25627	0.65765	-0.619975	1.34769	0.777867
YGL079W	KXD1	4	-0.670969	0.0680764	0.00568049	-0.400651	0.567672	0.591353	-0.235195	0.57405	0.801734
YGL081W	YGL081W	4	-0.0223875	0.175384	0.85898	0.0801976	0.845	0.949582	0.0335867	0.820025	0.978522
YGL082W	YGL082W	1	-7.42652	NA	NA	-0.741528	NA	NA	1.84028	NA	NA
YGL083W	SCY1	4	-0.271248	0.360771	0.328114	-0.28807	0.435649	0.616293	-0.261479	0.325183	0.623375
YGL086W	MAD1	4	1.08872	0.491014	0.0646405	1.15912	0.866954	0.341133	0.760547	1.03485	0.649213
YGL087C	MMS2	4	-1.36829	0.371584	0.0271105	-0.381521	1.15345	0.806432	0.0357715	1.24377	0.986516
YGL090W	LIF1	4	0.322219	0.250211	0.156135	0.182425	1.03346	0.898909	0.0163256	1.13114	0.994843
YGL094C	PAN2	4	2.71896	0.312238	0.00672618	1.04002	0.267863	0.0779473	0.0493922	0.187716	0.874847
YGL095C	VPS45	4	-0.620545	0.473057	0.152706	-0.461995	1.41254	0.808851	-0.317414	1.30976	0.881469
YGL101W	YGL101W	4	0.22874	0.684437	0.635585	-1.20296	0.584369	0.20392	-1.39699	0.505382	0.142176
YGL104C	VPS73	4	-0.701437	0.480216	0.126989	-0.863928	1.47089	0.65765	-0.708098	1.41922	0.766205
YGL107C	RMD9	1	-5.96955	NA	NA	-0.406698	NA	NA	1.66559	NA	NA
YGL108C	YGL108C	4	0.128039	0.141657	0.258076	0.234026	0.429634	0.679121	0.14011	0.41456	0.833749
YGL109W	YGL109W	4	-0.491273	0.453332	0.2009	-0.388207	0.649877	0.653328	-0.286874	0.73073	0.810792
YGL114W	YGL114W	4	-0.870629	0.42998	0.0746349	-0.478199	0.745048	0.629129	-0.244327	0.669099	0.820889
YGL115W	SNF4	4	-4.49001	0.192003	0.00175792	1.9528	0.706269	0.130605	3.59744	0.699018	0.0429421
YGL117W	YGL117W	4	-1.10471	0.339807	0.0339363	-0.450919	0.799077	0.667445	-0.131582	0.880869	0.925555
YGL118C	YGL118C	4	0.820558	0.389081	0.0700713	0.715469	0.934144	0.556397	0.393698	0.946875	0.797012
YGL121C	GPG1	4	-0.18367	0.391884	0.513967	0.0617046	0.342826	0.896967	0.0723216	0.371346	0.901868
YGL125W	MET13	4	-0.142379	0.750554	0.789849	-0.124341	0.473749	0.847551	-0.136855	0.409949	0.836727
YGL126W	SCS3	4	-0.621988	0.778483	0.303251	0.434076	0.54156	0.538328	0.619007	0.634473	0.546433
YGL132W	YGL132W	4	0.739364	0.161731	0.0189846	-0.0756854	0.842847	0.954081	-0.4034	0.91528	0.78627
YGL133W	ITC1	4	-0.985663	0.335987	0.040094	-0.361853	0.350926	0.434571	-0.0814049	0.412588	0.901802
YGL139W	FLC3	4	-0.101055	0.809365	0.861748	-0.202255	1.56749	0.928461	-0.233106	1.4587	0.918302
YGL140C	YGL140C	4	-0.310902	0.568633	0.453739	0.513693	0.853054	0.651711	0.590195	0.797119	0.647657
YGL141W	HUL5	4	9.74057	0.608115	0.00279599	-0.26392	1.08373	0.858455	-3.83977	1.27853	0.124337
YGL144C	ROG1	4	0.683383	0.183929	0.0268228	0.169959	0.798036	0.876173	-0.126687	0.829997	0.922905
YGL149W	YGL149W	4	-4.15442	0.703515	0.0128224	-1.68611	0.600769	0.127497	-0.324001	0.403017	0.623375
YGL151W	NUT1	4	-0.054807	0.361218	0.832842	0.602899	0.937653	0.628204	0.591191	1.00703	0.723048
YGL152C	YGL152C	4	0.0162056	0.356879	0.950813	-0.497886	1.4211	0.79436	-0.584084	1.61239	0.821763
YGL153W	PEX14	4	0.209826	0.404439	0.473692	-0.0886917	0.869628	0.944224	-0.226389	1.01827	0.893177
YGL156W	AMS1	4	0.253205	0.474994	0.464067	-0.13978	0.507362	0.837314	-0.295362	0.506935	0.724483
YGL157W	ARI1	4	0.422204	0.353773	0.174822	-0.0392455	1.41626	0.987298	-0.251186	1.56755	0.918302
YGL161C	YIP5	4	0.62326	0.884876	0.354034	0.335049	0.885272	0.777733	0.0673811	0.892007	0.962582
YGL162W	SUT1	4	0.0971579	0.691207	0.844989	-0.0702115	0.797804	0.954625	-0.166536	0.705252	0.885639
YGL163C	RAD54	4	-5.34766	1.06574	0.0164949	-1.29606	0.778262	0.266609	0.512855	0.752849	0.675109
YGL164C	YRB30	4	0.499302	0.57517	0.272569	-0.0194506	1.61077	0.994492	-0.25826	1.66802	0.92168
YGL166W	CUP2	4	0.232413	0.59607	0.582501	-0.133447	0.136089	0.452817	-0.281264	0.22674	0.434783
YGL167C	PMR1	4	-1.33243	0.31796	0.0218102	0.407888	1.26332	0.811719	0.847361	1.20734	0.66557
YGL176C	YGL176C	4	-0.0603268	0.263153	0.744157	-0.159115	1.10589	0.919362	-0.202708	1.08875	0.904279
YGL177W	YGL177W	4	1.1104	0.507045	0.0659833	0.4563	0.843592	0.680705	0.0186886	0.835436	0.991074
YGL179C	TOS3	4	0.0606946	0.171295	0.614938	-0.340441	0.718307	0.72105	-0.435653	0.779688	0.735169
YGL181W	GTS1	4	0.262436	0.192183	0.142555	-0.344047	0.410012	0.517167	-0.512031	0.407887	0.429351
YGL194C	HOS2	4	4.80191	0.385577	0.00396559	2.13733	0.258815	0.0205114	0.445771	0.178613	0.172434
YGL195W	GCN1	4	-2.12228	0.58076	0.0275343	0.775475	0.939967	0.524731	1.51558	1.01647	0.354521
YGL196W	DSD1	4	-0.251697	0.163924	0.116614	-0.571275	1.45479	0.770738	-0.56431	1.48814	0.818785
YGL197W	MDS3	4	-3.32537	1.41142	0.0580838	-0.877825	1.12683	0.550926	0.221808	1.186	0.903903
YGL198W	YIP4	4	-0.114263	0.234602	0.498003	-0.664897	1.02859	0.625612	-0.711559	1.09591	0.69805
YGL202W	ARO8	4	-0.414705	0.813732	0.481014	0.727829	0.755635	0.459544	0.851211	0.867001	0.541651
YGL203C	KEX1	4	0.731168	1.26692	0.432096	1.23788	0.600577	0.203618	0.9715	0.427606	0.204564
YGL205W	POX1	4	-0.798691	0.604414	0.150934	-0.223894	0.955134	0.865387	-0.00460947	1.09632	0.999016
YGL208W	SIP2	4	0.410556	0.518341	0.306084	-0.638085	0.305447	0.200345	-0.872451	0.412247	0.226773
YGL210W	YPT32	4	1.10055	0.486847	0.0624878	-0.741834	0.484074	0.295959	-1.22916	0.567293	0.220232
YGL211W	NCS6	2	-7.27143	0.23054	0.0498391	-1.55401	0.862204	0.573576	0.935862	0.817552	0.739385
YGL220W	FRA2	4	-1.06998	0.73286	0.127065	-0.653743	0.583148	0.405745	-0.355921	0.589808	0.720281
YGL221C	NIF3	4	-0.000327304	0.227252	0.998346	-0.0373347	0.650006	0.973395	-0.09711	0.739151	0.937442
YGL222C	EDC1	4	-0.47522	0.252795	0.0841279	0.0945873	0.917067	0.943327	0.211602	0.949868	0.893177
YGL224C	SDT1	4	0.547815	0.529244	0.214082	-0.267936	0.878433	0.82063	-0.535252	0.960355	0.735455
YGL226C-A	OST5	4	1.98887	0.524506	0.0260121	0.74174	0.681647	0.417782	0.000632426	0.638967	0.999359
YGL226W	MTC3	4	2.21181	0.439868	0.0164719	0.6191	1.05582	0.65765	-0.207704	1.04724	0.901802
YGL227W	VID30	4	0.230565	0.194463	0.17659	-0.248124	0.575195	0.7475	-0.400373	0.590894	0.677161
YGL228W	SHE10	4	-1.64714	0.421961	0.0249048	-0.850279	1.42299	0.653328	-0.353459	1.56267	0.891142
YGL229C	SAP4	4	-0.649185	0.257395	0.051609	-0.226147	1.20686	0.893412	-0.0607742	1.27936	0.974923
YGL230C	YGL230C	4	0.627389	0.604434	0.21331	0.236544	0.868444	0.840247	-0.0369883	1.00594	0.981378
YGL231C	EMC4	4	1.12771	0.687322	0.105831	0.34443	0.780008	0.74288	-0.104387	0.797842	0.937442
YGL234W	ADE5,7	4	1.0563	1.0225	0.214531	-0.267626	0.279536	0.463164	-0.717947	0.337591	0.226328
YGL236C	MTO1	4	0.681518	0.381548	0.0919898	-0.0181983	0.528289	0.983849	-0.322537	0.451673	0.662534
YGL237C	HAP2	4	3.86179	1.08609	0.0289725	4.42509	0.517464	0.0199379	3.17359	0.281573	0.0108153
YGL241W	KAP114	4	0.218723	0.350822	0.401214	-0.0533778	0.899861	0.973136	-0.192708	0.83985	0.890342
YGL244W	RTF1	4	-1.83783	0.469247	0.0248155	2.54757	0.777407	0.101259	3.26406	0.819721	0.074071
YGL248W	PDE1	4	-0.180398	0.242398	0.3326	-0.233604	0.81939	0.832372	-0.237292	0.860129	0.865624
YGL249W	ZIP2	4	-0.939225	0.135401	0.00994116	-0.0371375	1.36525	0.987298	0.24103	1.45407	0.916428
YGL251C	HFM1	4	-0.662947	0.275295	0.0561046	-0.719465	0.525891	0.333725	-0.571067	0.607026	0.555611
YGL253W	HXK2	4	-1.54418	0.267421	0.0134527	-0.18067	0.620683	0.829428	0.308857	0.632919	0.768227
YGL254W	FZF1	4	0.0805904	0.422794	0.788722	0.0450377	0.321012	0.921222	-0.0402004	0.245045	0.916936
YGL255W	ZRT1	4	1.6314	0.526501	0.03695	0.0944929	0.895504	0.941783	-0.546722	0.850906	0.700384
YGL256W	ADH4	4	-0.0337581	0.2036	0.816642	-0.724467	1.26604	0.661828	-0.802753	1.3158	0.717957
YGL257C	MNT2	4	0.295604	0.0309709	0.00583927	-0.43082	1.06946	0.765284	-0.614599	1.12058	0.739795
YGL258W	VEL1	4	-0.0819221	0.165014	0.490464	-0.542086	0.810397	0.613664	-0.59493	0.886039	0.681404
YGL259W	YPS5	4	0.797045	0.65204	0.16855	-0.403864	1.24262	0.81004	-0.766926	1.33621	0.728024
YGL260W	YGL260W	4	-0.137262	0.600156	0.744239	0.682245	1.11391	0.645392	0.703741	1.01202	0.669415
YGL262W	YGL262W	4	1.27475	0.485913	0.0483915	1.02559	0.899846	0.400061	0.554129	0.859607	0.699803
YGL263W	COS12	4	-0.823567	0.386291	0.0687708	-0.77064	0.726006	0.425706	-0.566706	0.784261	0.65651
YGR003W	CUL3	4	-1.12555	0.204978	0.0144951	-0.157842	0.590233	0.844257	0.182024	0.594162	0.854154
YGR004W	PEX31	4	0.956317	0.202177	0.0178998	0.832388	0.705898	0.385987	0.466951	0.762356	0.716507
YGR007W	ECT1	4	-0.0156078	0.727905	0.975971	-0.0972636	0.326317	0.825011	-0.154203	0.209912	0.649213
YGR008C	STF2	4	1.61992	0.70783	0.0611358	0.608655	0.6208	0.452817	-0.00557589	0.624772	0.995553
YGR010W	NMA2	4	0.132997	0.455291	0.676838	-0.27206	0.818854	0.805465	-0.390256	0.84961	0.777867
YGR012W	YGR012W	4	-0.915962	0.225568	0.0232974	-0.680988	0.776994	0.495787	-0.439813	0.740428	0.722938
YGR014W	MSB2	4	0.35199	0.418679	0.283773	0.394455	0.609865	0.625612	0.227065	0.524151	0.789625
YGR015C	YGR015C	4	0.322588	0.240952	0.147259	0.202245	1.00983	0.883545	0.0368932	1.12139	0.984844
YGR016W	YGR016W	4	0.285564	0.607861	0.513106	-0.329162	1.13745	0.830891	-0.504809	1.17581	0.7906
YGR019W	UGA1	4	0.160652	0.472372	0.630079	0.398426	1.41148	0.833601	0.30008	1.64185	0.905784
YGR021W	YGR021W	4	1.70555	1.15684	0.125123	0.739354	0.761353	0.455871	0.100111	0.946094	0.952102
YGR023W	MTL1	4	-0.275489	0.934956	0.673978	-0.135438	1.24817	0.940198	-0.100536	1.38691	0.964277
YGR027C	RPS25A	4	-3.3885	0.663129	0.0161868	-0.87597	0.906816	0.457695	0.246469	0.715925	0.828588
YGR033C	TIM21	4	-0.66536	0.180074	0.027029	-0.0992149	1.21635	0.957656	0.0776219	1.23068	0.967739
YGR035C	YGR035C	4	-0.194853	0.298318	0.383044	-0.218527	0.955732	0.869668	-0.216341	0.977328	0.893617
YGR037C	ACB1	4	-1.26621	0.296615	0.0213366	1.02265	0.684891	0.302848	1.46562	0.816234	0.286874
YGR039W	YGR039W	4	-0.806949	0.645839	0.163714	-0.416809	0.542406	0.555789	-0.203128	0.752782	0.870107
YGR042W	YGR042W	4	0.415756	0.208354	0.0762238	-0.030224	0.854488	0.983849	-0.239443	0.842182	0.86334
YGR043C	NQM1	4	0.754423	0.287482	0.0483893	-0.594285	0.34663	0.255007	-0.950471	0.357392	0.152005
YGR044C	RME1	4	0.288973	0.217694	0.149597	0.454894	0.304387	0.302848	0.312872	0.325239	0.553157
YGR045C	YGR045C	4	-0.114724	0.32224	0.613808	-0.696416	0.516601	0.337691	-0.744313	0.51407	0.36214
YGR049W	SCM4	4	0.0633852	0.112861	0.443336	-0.273108	0.467334	0.65765	-0.366295	0.490091	0.646672
YGR051C	YGR051C	4	-1.07277	0.483579	0.0646405	-0.233147	1.16626	0.883576	0.0843752	1.31181	0.967019
YGR052W	FMP48	4	0.213374	0.262186	0.295835	0.615969	0.789974	0.550793	0.508316	0.866622	0.723048
YGR054W	YGR054W	4	-0.554831	0.406273	0.142555	-0.523025	0.41036	0.359745	-0.404809	0.535294	0.642574
YGR055W	MUP1	4	0.723042	0.277687	0.0487138	-0.0249277	1.03533	0.98827	-0.344511	1.11102	0.85358
YGR056W	RSC1	1	-3.92957	NA	NA	2.17937	NA	NA	3.63236	NA	NA
YGR057C	LST7	4	-4.98428	0.255536	0.0021901	-0.955218	0.867253	0.411295	0.738063	0.947806	0.635208
YGR058W	PEF1	4	1.55095	0.272671	0.0137077	9.62917	0.466722	0.00636081	9.44073	0.544443	0.00648228
YGR059W	SPR3	4	0.0791813	0.304012	0.71132	-0.194375	1.44207	0.924663	-0.289748	1.43182	0.899621
YGR061C	ADE6	4	0.312	0.465889	0.37356	-0.0780106	0.718552	0.940198	-0.252009	0.705275	0.825098
YGR062C	COX18	4	-1.86134	0.543113	0.031163	6.66304	0.556373	0.0120432	7.57093	0.64457	0.0104248
YGR064W	YGR064W	2	-8.06058	0.0795445	0.025124	-1.17553	1.07723	0.687939	1.6152	1.09649	0.69805
YGR066C	YGR066C	4	0.535213	0.377052	0.133455	0.116656	0.482786	0.859483	-0.129029	0.50181	0.876219
YGR067C	YGR067C	4	-0.266451	0.167287	0.110209	-0.0768156	0.45155	0.902103	-0.0425609	0.517448	0.959423
YGR068C	ART5	4	-1.73628	0.12074	0.00321917	0.60034	0.434968	0.330614	1.19373	0.413745	0.130975
YGR069W	YGR069W	4	0.212628	0.289948	0.338452	-0.405116	1.26008	0.813366	-0.557888	1.39771	0.808121
YGR070W	ROM1	4	-0.180807	0.185097	0.23317	0.802138	0.590295	0.334731	0.844637	0.668322	0.426423
YGR071C	ENV11	4	1.92831	0.216543	0.00651491	1.2979	0.352544	0.0828514	0.603314	0.432872	0.38224
YGR077C	PEX8	4	-0.151883	0.356941	0.550077	-0.223447	0.506256	0.74288	-0.236947	0.586299	0.80566
YGR078C	PAC10	4	-6.51496	0.496973	0.00362363	4.65956	0.992335	0.0555807	7.15335	0.909733	0.0180229
YGR079W	YGR079W	4	0.63247	0.264468	0.0566971	0.137642	0.432299	0.81528	-0.142116	0.389452	0.820889
YGR081C	SLX9	4	-5.97829	0.65433	0.00631485	-3.39766	1.27957	0.138552	-1.45518	1.17885	0.436499
YGR084C	MRP13	4	4.86208	0.570688	0.00707114	2.05256	1.01318	0.209306	0.335576	0.85499	0.810792
YGR088W	CTT1	4	0.569082	0.276828	0.0731126	0.251476	0.704629	0.792787	-0.000406802	0.684593	0.999359
YGR096W	TPC1	4	0.61927	0.343135	0.0907644	-0.21172	0.514121	0.760478	-0.502256	0.589831	0.599644
YGR100W	MDR1	4	0.351782	0.336689	0.211752	-0.130208	1.20647	0.94064	-0.320844	1.26766	0.876952
YGR101W	PCP1	4	-4.98162	0.805887	0.0116283	3.1388	0.993608	0.108137	5.0131	1.13727	0.0601654
YGR107W	YGR107W	4	-1.57164	0.466349	0.0320353	-0.927979	0.459947	0.21073	-0.461786	0.500495	0.565193
YGR108W	CLB1	4	-0.600629	0.508817	0.177376	-0.815396	0.640148	0.359745	-0.693692	0.572771	0.447944
YGR109C	CLB6	4	0.365323	0.412192	0.26516	-0.659799	0.535193	0.370377	-0.87885	0.697286	0.427503
YGR111W	YGR111W	4	0.194387	0.241204	0.29977	0.504483	0.622255	0.532791	0.398709	0.689711	0.728024
YGR112W	SHY1	4	-1.10619	0.730913	0.119217	3.94425	0.540672	0.0235557	4.45949	0.515212	0.0157204
YGR118W	RPS23A	4	-4.18379	0.387239	0.00486815	-2.39296	0.819725	0.12053	-1.0517	0.838972	0.429701
YGR122W	YGR122W	4	-0.236773	0.535754	0.536604	2.33209	0.386907	0.0341075	2.46274	0.523057	0.0515174
YGR123C	PPT1	4	-0.0064579	0.329305	0.977995	0.631765	0.501131	0.362845	0.603938	0.480586	0.428829
YGR124W	ASN2	4	-0.632514	0.361266	0.095084	-0.244256	0.674959	0.78904	-0.0856888	0.828349	0.953212
YGR135W	PRE9	4	-3.44137	0.736966	0.0182878	-3.41662	0.573644	0.0350963	-2.38809	0.741647	0.110019
YGR136W	LSB1	4	-0.343233	0.209407	0.105927	-0.360085	1.0236	0.79436	-0.310786	1.01103	0.854065
YGR148C	RPL24B	4	-0.796972	0.879003	0.25728	-1.008	0.747073	0.337691	-0.824187	0.767264	0.504087
YGR184C	UBR1	4	0.422964	0.725949	0.429012	-0.0245386	0.706362	0.983849	-0.236099	0.639783	0.820667
YGR196C	FYV8	4	-0.831509	1.73168	0.504361	1.82397	1.04189	0.25003	2.1461	1.14528	0.269163
YGR207C	CIR1	4	-0.642618	0.783843	0.293112	0.0390378	0.718917	0.975928	0.213835	0.510338	0.79544
YGR129W	SYF2	4	-1.01147	0.405111	0.0523798	-0.345519	0.204511	0.262153	-0.0166209	0.320046	0.97294
YGR130C	YGR130C	4	0.373303	0.443775	0.283592	0.471108	0.31672	0.305097	0.381033	0.502885	0.641283
YGR131W	FHN1	4	1.40237	0.613134	0.0611725	0.653597	0.621186	0.427828	0.210806	0.591185	0.825347
YGR133W	PEX4	4	-0.175129	0.267918	0.382764	-0.363079	0.467368	0.551593	-0.337009	0.56923	0.723048
YGR141W	VPS62	4	1.89193	0.455891	0.0222137	0.0922494	0.681832	0.9243	-0.58152	0.764729	0.640561
YGR142W	BTN2	4	-1.04754	0.469186	0.0638584	-0.899101	0.640291	0.32367	-0.611178	0.781381	0.633072
YGR143W	SKN1	4	0.194492	0.201637	0.23702	-0.0750242	0.747405	0.945346	-0.153954	0.863637	0.908925
YGR144W	THI4	4	0.122574	0.116554	0.209825	-0.527238	1.31683	0.767614	-0.624354	1.47608	0.794298
YGR146C	ECL1	4	0.629844	0.302363	0.0715944	0.135584	0.76731	0.898909	-0.0795614	0.876416	0.956806
YGR152C	RSR1	4	-0.256391	0.253772	0.221708	0.18999	0.540008	0.79436	0.299227	0.584083	0.761551
YGR154C	GTO1	4	-0.851723	0.507503	0.102173	-0.701252	0.816415	0.507239	-0.464545	0.776358	0.720986
YGR164W	YGR164W	4	-0.452041	0.0884375	0.0161868	-0.928679	0.780373	0.381868	-0.858041	0.883235	0.547898
YGR166W	TRS65	4	2.36171	0.351189	0.0104185	0.487378	0.608381	0.53841	-0.317015	0.62765	0.766205
YGR168C	YGR168C	4	0.0443163	0.192246	0.743704	0.333527	0.317475	0.428043	0.34849	0.339009	0.521292
YGR169C	PUS6	4	-0.0223774	0.112145	0.778397	-0.0389245	0.751248	0.977113	-0.0362543	0.827846	0.976761
YGR170W	PSD2	4	-0.754949	0.249092	0.0382047	0.385725	0.362921	0.424955	0.693542	0.375325	0.273014
YGR176W	YGR176W	4	-0.0881625	0.414122	0.762768	0.905333	0.722522	0.365972	1.02373	0.770568	0.401685
YGR177C	ATF2	4	-1.06712	0.360147	0.0394535	-0.362083	0.306385	0.385295	-0.0147636	0.295082	0.973474
YGR180C	RNR4	3	-8.13714	0.197018	0.00461484	-2.79964	0.38054	0.0899447	-0.144435	0.389463	0.854893
YGR181W	TIM13	4	0.679133	0.598626	0.188385	-0.221332	0.683299	0.810783	-0.489013	0.743768	0.69237
YGR182C	YGR182C	4	1.39337	0.499559	0.0439062	1.07139	1.05507	0.440831	0.672563	1.07617	0.708611
YGR189C	CRH1	4	-0.790173	0.343307	0.0604719	-0.752195	0.344589	0.186306	-0.542614	0.327506	0.310254
YGR192C	TDH3	4	-0.417358	0.306976	0.143425	-0.8468	0.785156	0.418066	-0.780669	0.800638	0.546433
YGR200C	ELP2	3	-9.30226	0.319611	0.00657447	-2.20589	0.706418	0.226894	0.926682	0.717424	0.555611
YGR202C	PCT1	4	0.0437631	0.310122	0.844587	0.348475	0.782644	0.74098	0.365094	0.753078	0.768383
YGR205W	TDA10	4	0.0657466	0.124137	0.466089	0.402728	0.933398	0.7475	0.41672	1.00703	0.79776
YGR206W	MVB12	4	-1.29995	0.236921	0.014498	-0.650421	0.83263	0.55014	-0.24738	0.973547	0.876952
YGR212W	SLI1	4	-0.879303	0.759753	0.183166	-0.764018	0.463406	0.268916	-0.523499	0.720003	0.653215
YGR213C	RTA1	4	0.231297	0.125218	0.0870379	0.7441	0.459409	0.275465	0.731762	0.529866	0.382992
YGR214W	RPS0A	2	-4.92427	0.544439	0.109912	-2.29386	0.910322	0.490263	-0.746122	0.803036	0.771662
YHL003C	LAG1	4	2.39091	0.566666	0.0215975	0.560728	1.07161	0.694415	-0.247029	1.3106	0.903267
YHL005C	YHL005C	4	2.8409	1.75631	0.108005	3.19715	1.09574	0.12053	2.48436	0.738231	0.100772
YHL006C	SHU1	4	0.98407	0.672984	0.126726	0.815744	0.739336	0.411194	0.539362	0.587742	0.567597
YHL008C	YHL008C	4	-0.902845	0.562846	0.108991	-0.522891	1.54776	0.801376	-0.250392	1.58704	0.919049
YHL009C	YAP3	4	-0.810485	1.05532	0.319092	0.158444	0.268468	0.656905	0.464102	0.236325	0.253372
YHL012W	YHL012W	4	1.59079	0.141883	0.00461484	-0.878833	0.5992	0.308769	-1.53884	0.610731	0.169297
YHL013C	OTU2	4	-1.09638	0.659498	0.103703	-0.636151	0.961699	0.616293	-0.305014	1.20885	0.876952
YHL014C	YLF2	4	-0.197363	0.301384	0.382285	-0.681344	0.726244	0.469345	-0.678292	0.705263	0.553157
YHL016C	DUR3	4	1.60616	0.098033	0.00266214	0.546291	0.351731	0.290037	0.0196693	0.388185	0.973474
YHL019C	APM2	4	0.810035	0.662261	0.168497	0.142759	0.827754	0.90111	-0.136563	1.07612	0.940113
YHL020C	OPI1	4	-1.69434	0.331025	0.0161679	-0.11904	0.57265	0.880366	0.477795	0.63404	0.64469
YHL021C	AIM17	4	-0.424618	0.368245	0.184224	-0.578369	0.473423	0.373057	-0.483459	0.520662	0.563639
YHL022C	SPO11	4	0.237367	0.294191	0.299697	0.465378	0.771228	0.650813	0.423687	0.790683	0.750621
YHL023C	NPR3	4	1.02226	0.517696	0.0773821	1.00605	0.503283	0.213671	0.734472	0.684332	0.504087
YHL026C	YHL026C	4	0.562558	0.571374	0.230478	-0.344148	0.869754	0.769399	-0.58183	0.931742	0.708788
YHL027W	RIM101	4	-0.718516	1.02965	0.357871	1.2347	0.229923	0.0434436	1.61216	0.562486	0.131874
YHL028W	WSC4	4	0.446355	0.840493	0.465248	-0.17644	0.551801	0.814319	-0.355936	0.731777	0.768383
YHL029C	OCA5	4	0.260502	0.180338	0.129432	-0.296838	0.505398	0.65765	-0.421156	0.553222	0.640561
YHL030W	ECM29	4	0.745861	0.564354	0.150934	0.232008	1.04541	0.872533	-0.0155082	1.22725	0.995131
YHL032C	GUT1	4	0.25974	0.708933	0.603735	0.296005	0.619416	0.718741	0.229749	0.56147	0.802282
YHL033C	RPL8A	4	-1.27722	0.414038	0.0371565	-1.20538	0.946166	0.359745	-0.864618	1.07127	0.623214
YHL034C	SBP1	4	-6.25671	0.871683	0.0094977	-1.31876	0.298422	0.0639638	0.803761	0.21058	0.0788352
YHL036W	MUP3	4	0.687055	0.261624	0.0483346	-0.11143	1.10992	0.945346	-0.371251	1.22571	0.854893
YHL038C	CBP2	4	-2.10712	0.570917	0.0270835	6.22602	0.551763	0.013016	7.58995	0.511664	0.00783886
YHL040C	ARN1	4	1.2878	1.02304	0.161602	0.406695	0.18274	0.181691	-0.0189146	0.404942	0.975242
YHL041W	YHL041W	4	0.0413415	3.17418	0.985041	0.652979	0.872917	0.567175	0.700151	0.945061	0.647657
YHL042W	YHL042W	4	1.578	0.98515	0.109259	0.407701	0.708704	0.661412	-0.122293	0.500809	0.881469
YHL043W	ECM34	4	-0.266719	0.40673	0.38197	-0.313297	0.737482	0.752321	-0.249398	0.753267	0.839601
YHL044W	YHL044W	4	0.0134346	0.226396	0.935636	0.359905	0.357967	0.443607	0.388558	0.415603	0.560357
YHL045W	YHL045W	4	-0.947036	0.502898	0.0840886	-0.430962	0.47239	0.479196	-0.133592	0.501541	0.872338
YHL046C	PAU13	4	0.847624	0.879142	0.237126	-0.0801146	0.697682	0.937455	-0.394694	0.683773	0.728024
YHL047C	ARN2	4	0.656106	0.420875	0.113793	0.294984	0.668857	0.742888	0.0859209	0.871392	0.954383
YHR001W-A	QCR10	4	-0.495754	0.453564	0.198271	-0.145886	0.746405	0.885295	0.0167922	0.692991	0.989923
YHR010W	RPL27A	4	-2.56313	0.0527571	0.000975901	-1.09242	0.549964	0.214958	-0.277672	0.620288	0.781492
YHR012W	VPS29	4	-2.50923	0.18601	0.00351057	1.43517	0.403521	0.0869536	2.47689	0.399074	0.0293641
YHR013C	ARD1	4	-2.79962	0.284426	0.00568049	2.40819	0.743847	0.103182	3.64931	0.788173	0.0537131
YHR014W	SPO13	4	0.96752	0.54872	0.0939429	0.516291	0.528226	0.453737	0.216679	0.759128	0.862578
YHR015W	MIP6	4	0.334113	0.54788	0.410617	-0.337018	0.373121	0.483721	-0.491755	0.319824	0.341223
YHR022C	YHR022C	4	0.137444	0.287766	0.506549	-0.332841	0.656414	0.704464	-0.416363	0.707022	0.723048
YHR028C	DAP2	4	0.327728	0.269234	0.169704	-0.963958	0.443583	0.186867	-1.17751	0.404552	0.130474
YHR029C	YHI9	4	-0.0935444	0.397803	0.738696	-0.321052	0.583907	0.676338	-0.320259	0.691804	0.776997
YHR030C	SLT2	4	1.25424	0.251486	0.0166531	5.00098	0.878073	0.0385694	5.03529	1.0383	0.0486306
YHR031C	RRM3	4	1.64928	1.36687	0.172204	0.870278	0.843565	0.434571	0.35971	0.897312	0.807652
YHR034C	PIH1	4	-1.25548	0.365941	0.031139	-0.758806	0.395501	0.223368	-0.382341	0.421625	0.575645
YHR035W	NEL1	4	-0.12678	0.341593	0.599174	0.2702	0.38304	0.591353	0.340592	0.408306	0.608984
YHR037W	PUT2	4	0.321159	0.760005	0.552485	-0.362614	0.678982	0.685223	-0.515182	0.733946	0.66557
[truncated: 2,365 more rows]

## Sheet: tFT-Tom5
ORF	Gene Name	n	GFP.mean	GFP.sd	GFP.pval	mCherry.mean	mCherry.sd	mCherry.pval	ratio.mean	ratio.sd	ratio.pval
YBR269C	SDH8	4	-0.979291	0.314423	0.0324088	-1.05998	0.400369	0.0565129	-0.360542	0.966353	0.748511
YBR271W	EFM2	4	-0.557756	0.434263	0.145824	-0.595188	0.407521	0.143994	-0.155326	1.21564	0.922337
YBR273C	UBX7	4	0.361928	0.367239	0.217859	0.119709	0.405969	0.696084	-0.266421	0.318351	0.465971
YBR274W	CHK1	4	0.281626	0.369111	0.307062	0.170086	0.29163	0.450557	-0.0460144	0.84097	0.970089
YBR279W	PAF1	1	2.35414	NA	NA	1.21691	NA	NA	-1.3503	NA	NA
YBR281C	DUG2	4	-1.64726	0.69591	0.0515261	-1.65499	0.86853	0.0939196	-0.421411	0.702317	0.599808
YBR283C	SSH1	4	-3.83358	0.771786	0.0149207	-2.00252	0.780236	0.0592756	2.36813	0.852823	0.106018
YBR284W	YBR284W	4	0.165736	0.372711	0.523492	0.104598	0.623027	0.826068	0.0139302	0.852342	0.990761
YBR285W	YBR285W	4	-0.531028	0.29723	0.0833442	-0.070368	0.287432	0.74615	0.782995	0.622006	0.31676
YBR286W	APE3	4	-0.9438	0.595338	0.102219	-0.777203	0.707162	0.218442	0.111859	0.41765	0.822905
YBR291C	CTP1	4	-3.5323	0.556319	0.0101394	-2.778	0.621626	0.0233186	0.445687	0.602253	0.515807
YBR292C	YBR292C	4	-2.17284	0.631237	0.0272698	-1.88382	0.370545	0.0190184	-0.0221926	0.582109	0.980191
YBR293W	VBA2	4	-1.31713	0.57332	0.0540936	-1.08763	0.627118	0.109651	0.119162	0.608808	0.874218
YBR295W	PCA1	4	0.0860628	0.450798	0.78432	-0.0439905	0.534091	0.91744	-0.138318	0.481473	0.808173
YBR296C	PHO89	4	-0.0922622	0.432066	0.759117	0.0975509	0.379651	0.733861	0.406557	0.15381	0.112714
YBR298C	MAL31	4	0.136476	0.429198	0.646227	0.0419056	0.51479	0.918367	-0.0571565	0.5863	0.939119
YCR024C-A	PMP1	3	0.845464	3.28529	0.760059	1.66712	3.24231	0.584181	1.86359	0.889616	0.282022
YCR026C	NPP1	1	-1.70643	NA	NA	-1.27095	NA	NA	0.389042	NA	NA
YCR027C	RHB1	1	1.95488	NA	NA	1.72383	NA	NA	0.224589	NA	NA
YCR036W	RBK1	3	2.22023	1.33095	0.16792	2.11158	2.33992	0.3813	0.531562	2.37263	0.883017
YCR043C	YCR043C	3	1.63271	1.33672	0.245101	1.27617	1.4403	0.387656	-0.10489	0.595002	0.908468
YCR045C	RRT12	1	-0.300152	NA	NA	-0.611135	NA	NA	-0.590284	NA	NA
YCR051W	YCR051W	4	0.837468	0.713016	0.166644	1.35156	0.484415	0.0528393	1.28671	0.587005	0.152105
YCR059C	YIH1	4	0.578235	0.399951	0.11984	0.350977	0.549177	0.41564	-0.17463	0.671873	0.828757
YCR061W	YCR061W	4	-0.285024	1.01032	0.684683	0.179736	0.913848	0.796146	0.863262	0.370642	0.137592
YCR066W	RAD18	4	-3.74429	1.03881	0.0251381	-3.49622	0.991423	0.034887	-0.562524	0.319996	0.20914
YCR076C	FUB1	4	-0.63491	0.350001	0.0811401	-0.465541	0.317113	0.142851	0.208205	0.25301	0.469681
YCR079W	PTC6	4	-6.37556	0.37014	0.00203314	-5.27883	0.31198	0.00332207	0.246153	0.982464	0.834899
YCR081W	SRB8	1	-21.9691	NA	NA	-19.7825	NA	NA	-2.3204	NA	NA
YCR082W	AHC2	4	0.768904	0.870259	0.251945	0.715821	0.301192	0.0668899	0.207001	0.851315	0.839641
YCR087C-A	YCR087C-A	4	0.35939	0.240063	0.113327	0.14987	0.325162	0.545059	-0.206088	0.438454	0.683667
YCR087W	YCR087W	4	-1.42902	0.629733	0.054974	-1.35098	0.606659	0.0742391	-0.196779	0.787957	0.834899
YCR090C	YCR090C	4	0.93236	0.384771	0.0495388	0.794299	0.37516	0.080196	0.0965077	0.704643	0.914799
YCR091W	KIN82	4	1.45275	0.191791	0.00763379	1.18616	0.402432	0.0477287	0.0100174	0.697565	0.991811
YCR092C	MSH3	4	0.2847	0.529996	0.4481	-0.477443	0.309691	0.132331	-1.26043	0.465443	0.110203
YCR099C	YCR099C	4	1.01963	0.70961	0.120998	0.684589	0.846214	0.322956	-0.245697	0.688991	0.759659
YCR100C	YCR100C	4	0.539276	1.03187	0.457843	0.228504	1.04493	0.774732	-0.342134	0.874998	0.735216
YCR101C	YCR101C	4	0.358322	0.148551	0.0499049	-0.106832	0.216933	0.520095	-0.683926	0.595227	0.344982
YCR102C	YCR102C	4	-1.36364	0.335957	0.0204814	-1.10868	0.490228	0.0723714	0.152994	0.556912	0.818664
YCR105W	ADH7	4	-0.637848	0.229034	0.0387612	-0.622821	0.0997084	0.0139296	-0.0809732	0.371208	0.855696
YCR106W	RDS1	4	0.300184	0.492656	0.395038	0.183946	0.56353	0.668404	-0.049315	1.03529	0.973325
YDL130W-A	STF1	4	0.649093	0.372944	0.0874749	0.658874	0.572786	0.205417	0.289068	1.3258	0.855696
YDR363W-A	SEM1	4	-0.395024	0.533812	0.31816	0.141118	0.259297	0.478844	0.964136	0.670345	0.272004
YDR525W-A	SNA2	4	0.945375	0.810054	0.16792	0.897686	0.862102	0.235204	0.269164	0.371882	0.525701
YDR536W	STL1	4	0.164952	0.485173	0.623067	-0.124858	0.984564	0.869949	-0.413458	1.38763	0.80092
YDR538W	PAD1	4	0.502743	1.17515	0.538972	0.31112	0.819307	0.615307	-0.130347	0.584748	0.851522
YDR539W	FDC1	4	-0.229623	0.404346	0.426454	-0.790165	0.172787	0.0227807	-1.03564	0.63875	0.233346
YDR540C	IRC4	4	-0.0120207	0.13215	0.895448	-0.0467986	0.577738	0.918585	0.0107059	1.07928	0.995319
YDR541C	YDR541C	4	-0.147212	0.39397	0.591049	-0.29602	0.763984	0.609292	-0.242204	1.34871	0.887179
YER039C-A	YER039C-A	4	-0.0541494	0.399329	0.846323	-0.00210555	0.451391	0.995264	0.160454	0.792312	0.867509
YER091C-A	YER091C-A	4	1.74267	0.471665	0.024097	1.14962	0.762614	0.136781	-0.514231	0.877989	0.607134
YER101C	AST2	4	-0.753764	0.88324	0.264793	-0.268559	0.944243	0.707265	0.763103	0.410625	0.193051
YER103W	SSA4	4	0.133597	0.217723	0.392307	-0.140093	0.223817	0.423531	-0.3926	0.0945315	0.0541657
YER106W	MAM1	4	-0.187822	0.624105	0.663562	0.0661019	0.840101	0.920422	0.498111	0.707952	0.536367
YER113C	TMN3	4	1.04465	0.30824	0.028098	0.420573	0.238728	0.106845	-0.778221	0.583537	0.299078
YER114C	BOI2	4	1.22578	0.881893	0.127107	0.599522	1.28285	0.53995	-0.728844	1.07803	0.555005
YER115C	SPR6	4	0.181853	0.515141	0.610713	0.194036	0.361469	0.4843	0.15565	0.716224	0.855744
YER118C	SHO1	4	1.08028	0.543855	0.0693101	1.0284	0.120081	0.00871595	0.301148	1.01748	0.802069
YER119C	AVT6	4	-0.421835	0.510407	0.276691	-0.532605	0.436585	0.189053	-0.252202	0.594707	0.715172
YER119C-A	YER119C-A	4	-2.11589	0.130698	0.00218547	-2.26883	0.629674	0.0336062	-0.830977	0.987328	0.465332
YER121W	YER121W	4	0.260219	0.251127	0.201951	-0.159467	0.627581	0.736721	-0.627947	1.22788	0.658806
YER122C	GLO3	4	0.40808	0.190849	0.0608937	-0.429872	0.569488	0.35008	-1.36562	0.823124	0.226622
YER123W	YCK3	1	-6.73997	NA	NA	-4.71006	NA	NA	1.88176	NA	NA
YER124C	DSE1	4	1.1143	0.457012	0.0490068	0.927197	0.463361	0.0873471	0.0585952	0.648683	0.945404
YER128W	VFA1	4	1.23565	1.03918	0.16402	0.450679	1.17283	0.612614	-1.0224	0.628814	0.232815
YER129W	SAK1	4	-0.0369661	0.735807	0.943284	-0.196745	0.461064	0.574187	-0.230158	0.919959	0.834899
YER130C	COM2	4	-0.652859	0.656015	0.214893	-0.52197	0.205817	0.0604693	0.131026	0.846882	0.901265
YER131W	RPS26B	4	-2.43334	0.16308	0.00240647	-1.89434	0.317789	0.0150946	0.367871	0.711258	0.655038
YER132C	PMD1	4	0.0312901	0.058758	0.450669	-0.181962	0.302334	0.438192	-0.309899	0.613856	0.663418
YER134C	YER134C	4	-0.00215933	0.321394	0.991297	0.35717	0.502526	0.373013	0.749806	0.785175	0.411873
YER135C	YER135C	4	0.521285	0.096435	0.0129929	0.361309	0.283931	0.177175	-0.0657582	0.420146	0.900703
YER137C	YER137C	4	-1.58932	0.362445	0.0179493	-1.44546	0.532097	0.0548607	-0.121138	0.716112	0.895995
YER140W	EMP65	4	-0.454395	0.427146	0.193942	-0.430523	0.56042	0.342729	-0.0103027	0.913166	0.994247
YER141W	COX15	4	-14.6495	0.614053	0.00131492	10.6584	0.505352	0.00238078	43.0305	0.848988	0.000188128
YER142C	MAG1	4	2.10891	0.506188	0.0195606	1.80437	0.581033	0.0433105	0.132793	0.733182	0.886467
YER143W	DDI1	4	-0.187704	0.0820501	0.0542478	0.148313	0.486342	0.688866	0.651494	0.816827	0.482491
YER144C	UBP5	4	-1.21578	0.346843	0.0262685	-0.893051	0.295344	0.0457382	0.323239	0.735708	0.706183
YER145C	FTR1	4	-0.919115	0.340102	0.0408486	-0.832798	0.363105	0.0706829	-0.0308178	0.980386	0.98455
YER150W	SPI1	4	0.530687	0.4787	0.181793	0.637315	0.228523	0.0528395	0.435031	0.473218	0.427709
YER151C	UBP3	4	0.976353	0.330608	0.0354856	1.24362	1.01249	0.186895	0.866641	1.5363	0.623019
YER152C	YER152C	4	1.49491	0.791442	0.0757547	0.965585	0.483956	0.0878869	-0.468339	0.9694	0.674364
YER153C	PET122	4	-18.0253	0.914631	0.00166438	8.7341	1.07042	0.00953653	44.7454	0.690619	0.000133698
YER154W	OXA1	1	-18.8961	NA	NA	4.75143	NA	NA	38.6755	NA	NA
YER155C	BEM2	4	1.64141	0.786569	0.0633598	1.64681	0.60018	0.0543309	0.573776	0.371731	0.250005
YER156C	YER156C	4	-5.61179	0.564294	0.00474761	-5.06576	0.730876	0.0120809	-0.557116	0.863515	0.572756
YER158C	YER158C	4	0.524856	0.455909	0.171437	0.364641	0.404273	0.28418	-0.0651513	1.21353	0.970166
YER161C	SPT2	4	0.231102	0.501463	0.509782	0.0711528	0.828731	0.913991	-0.151355	0.944461	0.900703
YER163C	GCG1	4	0.0943756	0.169821	0.434618	0.0940453	0.689331	0.860552	0.106457	1.52223	0.958471
YER164W	CHD1	4	1.98891	1.1508	0.0883018	1.90835	1.61486	0.197425	0.515769	1.33448	0.738177
YER167W	BCK2	4	3.49167	0.815476	0.0186893	1.87691	0.237453	0.00992815	-1.90657	0.987725	0.183204
YER169W	RPH1	4	0.89427	0.637166	0.125027	0.675057	0.307843	0.0762223	-0.0663251	0.434334	0.903247
YER170W	ADK2	4	-0.144205	0.217114	0.361633	0.0374873	0.472293	0.920358	0.376057	0.790307	0.679138
YER173W	RAD24	4	-1.11241	0.391736	0.0375876	-0.782418	0.351061	0.0741406	0.367311	0.629017	0.608078
YER174C	GRX4	4	0.674476	0.946024	0.332447	0.489148	0.91788	0.487227	-0.0679002	0.537481	0.923114
YER175C	TMT1	4	0.433162	0.370425	0.167458	0.303555	0.866098	0.645561	-0.0350386	1.22639	0.984885
YER176W	ECM32	4	0.316595	0.0945526	0.0285987	0.223616	0.460438	0.525187	-0.00102213	0.84304	0.99887
YER177W	BMH1	4	-1.51593	0.65742	0.0537335	-0.161074	0.900877	0.815397	2.16266	0.824849	0.114244
YER180C	ISC10	4	-0.205592	0.807449	0.714	-0.352291	0.796221	0.560686	-0.255494	0.308197	0.468832
YER181C	YER181C	4	-0.994246	0.3971	0.0466275	-1.0158	0.467621	0.0772389	-0.254489	0.408114	0.58397
YER182W	FMP10	4	0.0567902	0.469361	0.864198	0.266099	0.633452	0.579775	0.486967	0.693591	0.536499
YER183C	FAU1	4	0.828523	0.201229	0.0199535	0.711537	0.479816	0.140453	0.105227	0.705767	0.906795
YER184C	TOG1	4	0.948815	0.631017	0.112488	0.664482	0.406298	0.120193	-0.17187	0.476377	0.755903
YER185W	PUG1	4	0.896881	0.669873	0.135378	0.696758	0.607638	0.206473	-0.0298959	1.20603	0.987065
YFL034C-A	RPL22B	4	-0.0951845	0.53356	0.797184	-0.0977738	0.537873	0.812039	0.0462882	0.571461	0.950977
YFR032C	RRT5	4	0.873528	0.68378	0.146905	0.666477	0.452863	0.142196	-0.0497308	0.836036	0.966623
YFR032C-A	RPL29	4	3.26582	1.56553	0.063379	2.62652	1.15875	0.0721153	-0.151086	0.937529	0.900703
YFR033C	QCR6	4	2.8415	0.407896	0.00877901	7.54093	0.740069	0.00694688	9.69637	0.744205	0.0043258
YFR034C	PHO4	4	0.593574	0.626351	0.229848	1.25773	0.445534	0.051604	1.49505	0.771145	0.182422
YFR035C	YFR035C	4	-2.63496	1.0491	0.046395	-4.55673	0.469417	0.00750568	-4.28833	0.894375	0.0419789
YFR036W	CDC26	4	0.287797	0.323486	0.24979	0.623377	0.455071	0.158044	0.791022	1.14813	0.546559
YFR038W	IRC5	4	1.18057	0.864749	0.131099	0.601169	0.389106	0.131925	-0.654648	0.885241	0.515831
YFR040W	SAP155	4	-2.45652	0.483773	0.0143377	-1.40803	0.294996	0.0211075	1.31275	0.553145	0.132568
YFR041C	ERJ5	4	0.73435	0.679987	0.189883	0.422432	0.979461	0.570094	-0.286697	0.855403	0.775788
YFR043C	IRC6	4	-0.236831	0.348576	0.352494	0.191549	0.589077	0.669891	0.809527	0.887324	0.430923
YFR044C	DUG1	4	0.2715	0.202782	0.135378	0.222011	0.292135	0.347203	0.0669069	0.520424	0.922337
YFR045W	YFR045W	4	0.067606	0.474732	0.839027	-0.0280421	0.514326	0.943312	-0.0794973	0.590143	0.916182
YFR046C	CNN1	4	-0.227993	0.43036	0.452323	-0.163854	0.183792	0.288928	0.131738	0.569703	0.846929
YFR048W	RMD8	4	-3.03305	0.365678	0.00656446	-2.37851	0.911162	0.0576443	0.40669	1.33163	0.795757
YFR049W	YMR31	4	1.36934	1.01973	0.134987	0.518023	1.0903	0.533535	-1.10687	0.59445	0.192783
YFR053C	HXK1	4	0.716569	0.242464	0.0354856	0.735776	0.87883	0.311137	0.326591	1.37688	0.843559
YFR054C	YFR054C	4	-0.622334	0.225522	0.039384	-0.718023	0.48047	0.138475	-0.283208	0.927636	0.795757
YFR055W	IRC7	4	-0.593664	0.498773	0.163772	-0.627654	0.634305	0.250034	-0.159495	0.933852	0.894616
YFR056C	YFR056C	4	0.502661	0.290048	0.087952	0.0599333	0.524144	0.884956	-0.599432	0.561536	0.371045
YFR057W	YFR057W	4	0.749619	0.216315	0.0269173	0.406925	0.39513	0.238249	-0.33968	0.748401	0.694161
YGR221C	TOS2	4	-0.389919	0.134067	0.0364425	-0.560486	0.733573	0.344948	-0.354483	1.18249	0.799516
YGR222W	PET54	4	-14.6422	0.604197	0.00131492	10.7947	0.427497	0.00212354	43.2735	0.739073	0.000156667
YGR223C	HSV2	4	0.0551844	0.217837	0.715591	-0.364332	0.190082	0.0928972	-0.688146	0.278474	0.124519
YGR224W	AZR1	4	1.22994	0.668077	0.0792097	0.778858	1.08435	0.36861	-0.400382	1.47515	0.820732
YGR225W	AMA1	4	-0.0748608	0.518298	0.836739	-0.305494	0.940275	0.670064	-0.373697	1.04048	0.757004
YGR226C	YGR226C	4	0.325411	0.112944	0.0368518	0.011502	0.503962	0.975254	-0.411115	0.936364	0.706364
YGR227W	DIE2	4	1.33756	0.558257	0.0503718	1.1083	0.465679	0.0668409	0.0457456	0.223795	0.866493
YGR231C	PHB2	1	-3.33421	NA	NA	-0.153787	NA	NA	5.03613	NA	NA
YGR232W	NAS6	4	-0.674229	0.564665	0.163248	-0.784395	0.278867	0.0519368	-0.325568	0.956025	0.771429
YGR233C	PHO81	4	0.660113	0.771851	0.26408	0.626701	0.853851	0.36058	0.211637	0.982525	0.857827
YGR234W	YHB1	4	1.95056	1.25888	0.106532	0.819322	1.35264	0.43666	-1.45822	1.04346	0.282022
YGR236C	SPG1	4	-0.438044	1.02552	0.539424	-0.578319	0.679878	0.305218	-0.312102	0.771968	0.726352
YGR237C	YGR237C	4	-0.908398	0.721539	0.150494	-0.746869	0.811617	0.276655	0.11284	0.55815	0.867509
YGR241C	YAP1802	4	-0.919053	0.341857	0.0410401	-0.646158	0.579633	0.213813	0.317726	1.0149	0.791217
YGR242W	YGR242W	4	-0.841436	0.262687	0.0308068	-0.965338	0.677653	0.149136	-0.400577	1.10668	0.755903
YGR243W	MPC3	4	-0.812159	0.539373	0.112215	-0.617166	0.198423	0.0433105	0.203755	0.87604	0.846024
YGR244C	LSC2	4	0.487621	0.586799	0.274761	0.35792	0.398124	0.285522	-0.0191409	0.395146	0.972827
YGR247W	CPD1	4	-0.122242	0.439301	0.688957	-0.320015	0.478239	0.396767	-0.326298	0.828158	0.734065
YGR249W	MGA1	4	-0.30916	0.229204	0.133964	-0.48734	0.290684	0.115062	-0.344868	0.361439	0.411873
YGR256W	GND2	4	0.731245	0.411158	0.083823	0.304243	0.822613	0.625568	-0.502592	0.947178	0.647177
YGR260W	TNA1	4	-0.165334	0.543902	0.660281	-0.576695	0.731898	0.33279	-0.737998	0.887766	0.467997
YGR261C	APL6	1	-11.2368	NA	NA	-12.2936	NA	NA	-5.21138	NA	NA
YGR263C	SAY1	4	-0.236315	0.589655	0.564456	-0.40792	0.882337	0.543943	-0.311086	0.974717	0.786916
YGR266W	YGR266W	4	1.41569	0.461144	0.0332005	1.30949	0.595972	0.0761307	0.298671	0.68424	0.707171
YGR268C	HUA1	4	0.441997	0.259746	0.0910118	0.499981	0.535148	0.270122	0.317989	0.656826	0.674097
YGR270W	YTA7	2	1.59751	0.40914	0.182688	4.10986	0.137967	0.0611599	5.24375	0.385791	0.190849
YGR275W	RTT102	4	0.432479	0.564015	0.30544	0.141438	0.889294	0.835809	-0.336797	0.776533	0.708691
YGR279C	SCW4	4	-0.129999	1.15508	0.873328	-0.672899	1.31436	0.503613	-0.973283	0.662516	0.264589
YGR281W	YOR1	4	-0.368245	1.18003	0.651821	-0.220682	1.28173	0.821613	0.246177	0.561991	0.706555
YGR282C	BGL2	4	0.418822	0.74061	0.428484	0.0520824	0.712066	0.925644	-0.482233	0.227116	0.15981
YGR283C	YGR283C	4	-1.10945	0.118223	0.00532053	-0.873579	0.472373	0.0981393	0.19237	0.8262	0.846024
YGR284C	ERV29	4	-0.355262	0.373126	0.22808	-0.758491	0.127839	0.0151762	-0.778863	0.684784	0.34611
YGR288W	MAL13	4	-0.126748	0.646706	0.778215	-0.259157	0.375737	0.384427	-0.20553	0.802547	0.831536
YGR290W	YGR290W	4	1.02256	0.444611	0.0540336	0.370277	0.832001	0.558595	-0.837426	1.02996	0.474713
YHR021W-A	ECM12	4	1.10173	0.0632849	0.00203314	0.928775	0.327286	0.0511211	0.0813188	0.598416	0.915176
YHR079C-B	YHR079C-B	4	0.453168	1.45755	0.652793	0.0955039	1.31233	0.925644	-0.455141	0.722916	0.580917
YIL009C-A	EST3	4	-2.05595	0.472675	0.0182404	-1.59332	0.729789	0.0768057	0.336596	0.674083	0.667242
YIR017C	MET28	4	0.948145	0.743827	0.147474	0.860826	0.782055	0.217855	0.195953	1.33639	0.908268
YIR018W	YAP5	4	-0.0564386	0.442313	0.855809	-0.73343	0.602538	0.189324	-1.20205	0.474524	0.118708
YIR019C	FLO11	4	1.10996	0.87514	0.148599	0.412361	0.496697	0.313943	-0.896282	1.09966	0.474111
YIR020C	YIR020C	4	0.201593	0.197471	0.206732	0.104017	0.516862	0.790347	-0.0435516	0.681598	0.962015
YIR021W	MRS1	4	-14.7425	0.630971	0.00132022	12.5737	0.44224	0.00212354	46.7544	0.686146	0.000133698
YIR024C	INA22	4	-0.783135	0.477114	0.0970403	0.0506643	0.588718	0.913914	1.40561	0.72072	0.180657
YIR027C	DAL1	4	0.312414	0.237461	0.139968	0.435919	0.212425	0.084245	0.402134	0.216063	0.192783
YIR028W	DAL4	4	0.333576	0.596796	0.432307	0.240771	0.757043	0.677434	0.00431407	0.623683	0.996208
YIR029W	DAL2	4	-0.292534	0.624133	0.50371	-0.130341	0.434507	0.692145	0.295853	0.627838	0.682832
YIR031C	DAL7	4	1.1487	0.161377	0.00836571	1.01153	0.244709	0.0266144	0.162033	0.299361	0.639847
YIR033W	MGA2	4	-0.712897	0.734236	0.222558	-0.975351	0.459718	0.0800075	-0.621454	0.478635	0.308237
YIR035C	YIR035C	4	-0.0133275	0.616641	0.974701	0.0190144	1.02652	0.980673	0.135699	1.36586	0.938336
YIR036C	IRC24	4	-0.18708	0.423775	0.526003	-0.540239	0.230973	0.0684069	-0.635694	0.325488	0.180651
YIR037W	HYR1	4	-0.199264	0.537264	0.593885	-0.198423	0.819106	0.748809	0.0219759	0.901707	0.987065
YIR038C	GTT1	4	1.00749	0.581783	0.087952	0.96147	0.516995	0.0975917	0.29062	0.379625	0.500039
YIR039C	YPS6	4	0.114684	0.363709	0.648981	0.0519709	0.469537	0.888691	-0.00407926	0.421013	0.995423
YIR042C	YIR042C	4	-0.913606	0.631663	0.119791	-0.372912	0.608535	0.43181	0.819579	1.13553	0.526574
YKL033W-A	YKL033W-A	4	0.690351	0.263135	0.0430788	0.40147	0.663643	0.437159	-0.256651	0.907503	0.8113
YKL162C-A	YKL162C-A	4	0.038142	0.210003	0.794502	-0.201725	0.374558	0.483096	-0.357594	0.947103	0.744991
YKR035W-A	DID2	4	-2.37751	0.329803	0.00809996	-0.661067	0.40247	0.119356	2.5838	0.455088	0.0286392
YKR066C	CCP1	4	1.00751	1.21386	0.275214	0.616697	1.3986	0.56183	-0.353446	0.725792	0.672181
YKR067W	GPT2	4	0.824727	0.306503	0.0410037	0.602241	0.558715	0.224072	-0.0929669	0.635917	0.908468
YKR069W	MET1	4	0.243815	0.118548	0.0651209	-0.437135	0.157158	0.0531121	-1.12083	0.368667	0.0935686
YKR070W	YKR070W	4	0.177416	0.391274	0.516475	0.168702	0.383721	0.562571	0.115305	0.531099	0.85582
YKR072C	SIS2	4	0.72408	0.83328	0.258236	0.858849	0.809853	0.229035	0.544677	0.46253	0.335584
YKR075C	YKR075C	4	0.998187	0.263541	0.0230422	1.08894	0.487395	0.0739007	0.543357	0.648177	0.465971
YKR076W	ECM4	4	0.129095	0.76836	0.809194	0.0636043	0.914646	0.928322	-0.00501563	0.538526	0.995737
YKR077W	MSA2	4	0.936058	0.118632	0.00723026	0.74357	0.371259	0.0872053	-0.00407068	0.540197	0.995761
YKR080W	MTD1	4	0.497824	0.364604	0.131099	0.666351	0.170729	0.0292819	0.540958	0.631304	0.457765
YKR082W	NUP133	3	-2.29951	0.0867243	0.00656446	-2.64493	0.604138	0.0652541	-1.24472	1.02142	0.435904
YKR089C	TGL4	4	0.0910583	0.34226	0.702232	0.265835	0.696295	0.614856	0.432576	0.886977	0.672181
YKR090W	PXL1	4	0.565025	0.475798	0.164234	0.168268	0.389361	0.569395	-0.495153	0.620424	0.482491
YKR091W	SRL3	4	0.0329109	1.11526	0.96705	-0.368976	1.01095	0.630017	-0.661788	0.643929	0.383616
YKR092C	SRP40	2	-1.84013	1.74913	0.461845	-1.30317	0.888912	0.410024	0.539143	1.09062	0.811469
YKR093W	PTR2	4	0.183991	0.327793	0.431235	0.448243	0.436215	0.238807	0.627145	0.377745	0.226622
YKR097W	PCK1	4	-0.948776	0.293709	0.0303367	-0.291415	0.654324	0.558382	1.02713	0.914258	0.35078
YKR098C	UBP11	4	-0.132367	0.298563	0.524538	-0.44673	0.321312	0.15485	-0.547076	0.606181	0.435904
YKR101W	SIR1	4	-2.03555	0.417267	0.015146	-1.61914	0.562055	0.0497408	0.25628	0.676143	0.744073
YKR104W	YKR104W	4	0.0877166	0.37639	0.73582	0.219869	0.116805	0.0957281	0.351969	0.494562	0.532971
YKR105C	VBA5	4	0.0452355	0.169029	0.700829	0.0532032	0.489181	0.890925	0.107454	0.687465	0.900703
YLL018C-A	COX19	4	-18.0413	1.97131	0.00558556	9.76284	0.725552	0.00461514	46.6922	4.25608	0.00662803
YLR262C-A	TMA7	4	-0.501463	0.393437	0.147474	-0.392483	0.486132	0.323452	0.134784	0.96662	0.913876
YLR422W	YLR422W	4	-7.63768	1.31204	0.0116463	-6.13372	1.56592	0.0290725	0.634348	1.302	0.672181
YLR427W	MAG2	4	-0.300774	0.184686	0.0984851	0.0332878	0.363309	0.908012	0.61447	0.95715	0.57322
YLR428C	YLR428C	4	1.42061	0.214953	0.00944894	0.767543	0.58925	0.170626	-0.721419	0.899126	0.481018
YLR429W	CRN1	4	0.581838	1.20374	0.490501	0.653265	1.08165	0.437404	0.384373	0.737258	0.652805
YLR431C	ATG23	4	-0.242445	0.366964	0.363761	-0.0471986	0.646228	0.925644	0.372379	0.829971	0.699389
YLR432W	IMD3	4	-0.253632	0.261202	0.222558	-0.385926	0.516217	0.353593	-0.242766	0.902307	0.821715
YLR433C	CNA1	4	-0.499485	0.540372	0.237204	-0.514656	0.819877	0.422347	-0.0965426	0.890048	0.933242
YLR434C	YLR434C	4	-1.54319	0.563827	0.0399743	-1.79907	0.311608	0.015871	-0.85423	0.616223	0.284771
YLR438W	CAR2	4	-0.0215278	0.110771	0.780381	0.0247236	0.302223	0.918056	0.159262	0.471944	0.774306
YLR441C	RPS1A	3	-5.73645	0.462747	0.0149037	-4.78648	0.470779	0.0242378	0.160653	0.290836	0.702852
YLR443W	ECM7	4	-0.540161	0.223859	0.0498923	-0.823653	0.198281	0.0263276	-0.609769	0.263388	0.138596
YLR444C	YLR444C	4	0.4169	0.960528	0.533362	0.0808915	1.0249	0.920422	-0.425394	0.429042	0.397581
YLR445W	GMC2	4	-0.265105	0.227185	0.16792	-0.389544	0.633776	0.430757	-0.231478	0.920077	0.83446
YLR449W	FPR4	4	-1.35834	0.610578	0.0572032	-0.976522	0.836785	0.200985	0.391534	0.901558	0.708388
YLR450W	HMG2	4	-0.534422	0.36584	0.118172	-0.766607	0.666489	0.205417	-0.512236	0.734797	0.540747
YLR452C	SST2	1	-2.98921	NA	NA	-0.77401	NA	NA	3.33493	NA	NA
YLR454W	FMP27	4	-0.0607389	0.383223	0.821243	-0.100685	0.499609	0.790282	-0.0133275	1.13981	0.994247
YML009C	MRPL39	4	-0.818908	0.840039	0.221417	2.18117	0.704323	0.0435994	5.44163	0.258822	0.0013402
YML021C	UNG1	4	0.0662709	0.271301	0.725117	0.0427043	0.420875	0.898134	0.0547564	0.470527	0.929211
YML081C-A	ATP18	4	-3.79099	0.259526	0.00247892	6.73932	0.433456	0.00380878	18.6308	0.895162	0.00134644
YMR052C-A	YMR052C-A	4	-0.784069	0.570923	0.129854	-0.357004	0.460145	0.339209	0.645554	0.44925	0.272004
YMR052W	FAR3	4	0.761209	0.871792	0.256314	0.0358202	0.698711	0.94678	-1.05113	0.9825	0.370294
YMR053C	STB2	4	0.429877	0.300947	0.122305	-0.0272627	0.677396	0.957008	-0.647837	1.05764	0.591012
YMR055C	BUB2	4	-1.33274	0.19773	0.00919172	-0.942335	0.287825	0.039949	0.41514	0.612969	0.553906
YMR056C	AAC1	4	-0.662614	0.100775	0.00949421	-0.70105	0.452444	0.131681	-0.188149	0.908713	0.863995
YMR057C	YMR057C	4	-0.42805	0.147555	0.0364425	-0.166193	0.151353	0.218591	0.442026	0.190656	0.138294
YMR060C	SAM37	1	-5.01276	NA	NA	-1.31069	NA	NA	5.51514	NA	NA
YMR063W	RIM9	4	-1.56233	0.789716	0.0698021	0.0512353	1.16029	0.954406	2.63222	1.2312	0.158357
YMR064W	AEP1	4	-16.4559	0.908062	0.00193093	6.77161	0.371614	0.00295128	38.6111	0.788378	0.000188128
YMR065W	KAR5	4	-0.45394	0.885232	0.466391	-0.480358	0.541131	0.290696	-0.104111	0.561718	0.883017
YMR067C	UBX4	4	-1.3433	0.481583	0.0386841	-0.0750355	0.751972	0.899309	2.05185	0.65098	0.0877654
YMR068W	AVO2	4	0.745315	0.876962	0.266397	0.481024	0.767119	0.422805	-0.194494	0.72459	0.82247
YMR072W	ABF2	4	-7.49493	0.549279	0.00276309	2.78461	0.314027	0.00821039	17.0692	1.2341	0.00374189
YMR073C	IRC21	4	0.392289	0.387905	0.209659	1.26681	0.714231	0.105655	1.8286	0.970793	0.19067
YMR075C-A	YMR075C-A	4	-0.531236	0.384422	0.128421	-0.531025	0.804997	0.402444	-0.0771817	1.10367	0.958471
YMR075W	RCO1	4	-1.12317	0.260378	0.0185359	-1.30814	0.270427	0.0207983	-0.597794	0.501899	0.332939
YMR083W	ADH3	4	-1.83286	0.838109	0.0585023	-1.10648	1.03974	0.228235	0.895116	0.679323	0.303115
YMR085W	YMR085W	4	-0.376114	0.316004	0.163772	-0.206931	0.687573	0.691177	0.284241	1.18079	0.841103
YMR086C-A	YMR086C-A	4	0.254495	0.152682	0.0945194	0.0533421	0.716384	0.924342	-0.221419	1.16177	0.878236
YMR086W	SEG1	4	1.48225	1.36307	0.187864	1.25277	1.15744	0.222986	0.0880421	0.742736	0.927122
YMR087W	YMR087W	4	0.290758	0.4925	0.409381	0.318339	0.266362	0.194984	0.216558	0.695591	0.791987
YMR088C	VBA1	4	-0.65649	0.725028	0.244089	-0.462201	0.440699	0.232663	0.248387	0.338549	0.518655
YMR090W	YMR090W	4	0.0771808	0.112198	0.347453	-0.298581	0.274373	0.22172	-0.599921	0.558772	0.369708
YMR158C-B	YMR158C-B	4	0.508488	0.172494	0.035547	0.710046	0.369723	0.0926849	0.605808	0.572649	0.373589
YMR169C	ALD3	4	0.996628	0.326393	0.0334671	0.527285	0.309361	0.112159	-0.503355	0.517839	0.406843
YMR174C	PAI3	4	-0.355877	0.225871	0.103222	-0.38066	0.0688156	0.0169799	-0.072113	0.316438	0.84777
YMR175W	SIP18	4	0.87572	0.551494	0.10195	0.0981144	0.459478	0.779497	-1.11487	0.529868	0.162428
YNR032C-A	HUB1	4	1.123	0.0815522	0.00272824	1.12384	0.539667	0.0821066	0.412253	0.998695	0.721177
YNR051C	BRE5	4	1.93766	0.586525	0.0292163	1.8181	0.985509	0.0985452	0.427793	1.31342	0.7815
YNR056C	BIO5	4	0.190831	0.374829	0.469492	0.417111	0.576345	0.365839	0.558232	0.818355	0.550931
YNR057C	BIO4	4	-0.650028	0.350342	0.0782364	-0.694381	0.481974	0.146688	-0.195488	0.853234	0.84777
YNR058W	BIO3	4	-0.648067	0.322665	0.0679017	-0.805156	0.360997	0.0740557	-0.405498	0.468886	0.452994
YNR061C	YNR061C	4	-0.906268	0.640142	0.123612	-0.687248	0.68554	0.246173	0.220861	1.04734	0.86091
YNR063W	YNR063W	4	-1.62381	0.496542	0.0297808	-1.83379	0.700515	0.0575608	-0.7923	0.661094	0.331076
YNR064C	YNR064C	4	0.120137	0.458021	0.705882	0.255485	0.540204	0.535192	0.367507	1.48752	0.836728
YNR065C	YNR065C	4	0.629003	0.271201	0.0532853	0.574975	0.275127	0.0818029	0.163946	0.875303	0.881262
YNR067C	DSE4	4	0.111817	0.616094	0.794502	0.086067	0.874819	0.900974	0.0641204	1.16579	0.970089
YNR068C	YNR068C	4	0.0729277	0.377144	0.781185	-0.101281	0.688657	0.84809	-0.224677	0.819419	0.818664
YNR070W	PDR18	4	0.757484	0.247683	0.0334386	0.303708	0.359466	0.307688	-0.54486	0.622649	0.448605
YNR071C	YNR071C	4	1.48815	0.318374	0.0162854	1.40485	0.710133	0.0890083	0.362837	1.07603	0.774306
YNR074C	AIF1	4	1.5222	0.865756	0.0858399	0.924363	0.82536	0.213049	-0.588256	0.639809	0.427709
YNR075W	COS10	4	0.76548	0.517912	0.116007	0.617755	0.413176	0.138394	0.029201	0.590549	0.972363
YOL013W-A	YOL013W-A	4	-0.0481597	0.507938	0.891915	0.11859	0.678876	0.819373	0.376492	1.4351	0.826258
YOL087C	DUF1	4	-0.147394	0.140585	0.198429	-0.796876	0.391436	0.0854489	-1.17751	0.811051	0.268468
YOL091W	SPO21	4	0.0980092	0.107459	0.241647	-0.140857	0.191705	0.360457	-0.338054	0.510433	0.563153
YOL092W	YPQ1	4	0.698477	0.30857	0.0552014	0.698706	0.490274	0.149136	0.285801	0.527707	0.639673
YOL093W	TRM10	4	-0.562484	0.27946	0.067655	-1.00872	0.870091	0.203152	-0.920356	1.63423	0.623293
YOL095C	HMI1	2	-20.4868	0.631613	0.0437206	0.251781	1.31451	0.883047	32.772	1.46206	0.143037
YOL096C	COQ3	4	-16.16	0.197642	0.000604357	10.1581	0.444845	0.00232642	44.4715	1.01531	0.000219737
YOL098C	YOL098C	4	-0.481062	0.388796	0.154507	-0.53519	1.21789	0.562645	-0.163877	2.03486	0.95123
YOL103W	ITR2	4	0.431726	0.302112	0.122244	0.282002	0.518652	0.479061	-0.073041	0.879286	0.949453
YOL104C	NDJ1	4	-0.026158	0.296492	0.898284	-0.0228247	0.644098	0.962318	0.0777246	1.07004	0.957428
YOL105C	WSC3	4	-2.05104	0.298149	0.00892657	-0.91852	0.227524	0.0273832	1.58939	0.464415	0.0774357
YOL106W	YOL106W	4	0.887896	0.963912	0.238386	0.301801	0.909155	0.66323	-0.753539	0.531028	0.275951
YOL109W	ZEO1	4	1.08401	0.378067	0.0370632	1.10053	0.695168	0.126854	0.430024	0.748612	0.615694
YOL110W	SHR5	4	-0.227393	0.549688	0.552911	-0.350361	0.744147	0.536908	-0.217598	1.01425	0.857957
YOL116W	MSN1	4	0.767311	0.335925	0.0543652	0.112743	0.548098	0.785835	-0.917036	0.811719	0.348298
YOL117W	RRI2	4	-0.529243	0.213345	0.047348	-0.877964	0.522023	0.114657	-0.728394	0.718554	0.389307
YOL118C	YOL118C	4	-0.298615	0.212183	0.1244	-0.415994	0.475839	0.295648	-0.228181	0.565217	0.726457
YOL119C	MCH4	4	-0.11317	0.942522	0.865031	-0.189039	0.619243	0.688866	-0.0959056	0.555928	0.89318
YOL122C	SMF1	4	0.181782	0.547915	0.631613	-0.0451519	0.472065	0.90416	-0.291039	0.762703	0.742142
YOL128C	YGK3	4	-0.224057	0.601744	0.592272	-0.450175	0.5529	0.320856	-0.409298	0.54427	0.508998
YOL129W	VPS68	4	-1.62655	0.278937	0.0116463	-1.43515	0.3396	0.0255311	-0.0433159	0.600151	0.957657
YOL131W	YOL131W	4	-1.1706	0.570908	0.0654281	-0.949632	0.488564	0.0912025	0.146482	0.125898	0.339723
YAL054C	ACS1	4	-0.274758	1.10197	0.719419	-0.423625	0.884518	0.530565	-0.390973	0.785287	0.668112
YAL058C-A	YAL058C-A	4	-0.89411	0.351802	0.0453389	-1.29718	0.557726	0.069275	-1.37191	0.726817	0.190086
YAR050W	FLO1	4	0.810647	0.229294	0.0259304	0.632872	0.249838	0.0604693	0.092996	0.678577	0.914799
YBR232C	YBR232C	4	-0.0150643	0.465977	0.964624	-0.211516	0.642118	0.665333	-0.38106	0.733596	0.653951
YCL006C	YCL006C	2	-1.76958	0.0286828	0.0298483	-1.65123	0.21304	0.138117	-0.465454	0.614554	0.7264
YCL022C	YCL022C	1	-1.67552	NA	NA	-1.32833	NA	NA	0.178804	NA	NA
YCL023C	YCL023C	2	1.30681	0.472597	0.234953	1.27497	0.650803	0.341325	0.728575	0.707462	0.660206
YCL035C	GRX1	4	0.600481	0.323457	0.0781668	0.276525	0.269116	0.238807	-0.395874	0.46806	0.463664
YCL074W	YCL074W	4	-0.0115511	0.438959	0.969732	-0.115789	0.482862	0.75133	-0.139168	0.652223	0.858555
YCL075W	YCL075W	4	0.874172	0.371833	0.0520599	0.643791	0.51305	0.181046	-0.0112351	1.11208	0.995285
YCL076W	YCL076W	4	0.460448	0.410516	0.178405	0.573584	0.58074	0.25059	0.66996	0.690852	0.407159
YCR095C	OCA4	4	0.847688	0.795022	0.193189	0.197271	0.68922	0.705533	-1.11846	0.313879	0.0714553
YDR071C	PAA1	4	1.24102	0.506252	0.0485518	0.964106	0.337368	0.0504694	0.056622	0.54369	0.936727
YDR424C	DYN2	4	-0.327029	0.358255	0.241409	-0.216151	0.340563	0.417844	0.258348	0.346455	0.512152
YDR427W	RPN9	1	1.71694	NA	NA	0.767604	NA	NA	-1.44884	NA	NA
YDR537C	YDR537C	4	-0.0318838	0.490442	0.925381	-0.358811	0.403537	0.290067	-0.729423	0.436867	0.225899
YEL011W	GLC3	4	-0.550644	0.280903	0.0709168	0.000698823	0.275303	0.997503	1.2899	0.209345	0.0241401
YEL012W	UBC8	4	0.72801	0.430181	0.0917542	0.7878	0.335853	0.0681183	0.668926	0.633563	0.373655
YER027C	GAL83	4	1.17847	1.11379	0.195765	0.505282	0.80164	0.421027	-1.00731	0.451203	0.147484
YER031C	YPT31	4	-1.06025	0.237434	0.0174297	-0.430805	0.362149	0.196118	1.23068	0.615421	0.174475
YER037W	PHM8	4	0.977551	0.602502	0.0989997	0.624629	0.846151	0.358909	-0.277012	1.17184	0.843559
YER046W	SPO73	4	0.160701	0.56505	0.682155	0.238149	0.35723	0.398042	0.422606	0.477846	0.444282
YER063W	THO1	4	-0.168225	0.282439	0.405337	-0.0719378	0.189344	0.615238	0.302181	0.55273	0.636968
YER064C	VHR2	4	-0.216374	0.120314	0.0823945	-0.267613	0.100396	0.0562775	-0.106716	0.37736	0.8113
YER078C	ICP55	4	0.676797	0.273823	0.0476194	3.23989	0.395896	0.00952409	7.15997	1.06442	0.0199424
YER088C	DOT6	4	2.13633	1.11417	0.0737682	1.39135	1.18683	0.199509	-0.700705	0.766297	0.429403
YER090W	TRP2	4	0.477842	0.2446	0.0712744	0.526227	0.130922	0.0276872	0.510341	0.802084	0.577202
YER092W	IES5	4	-4.49116	0.363881	0.00328582	-3.27208	0.237101	0.0044973	0.99811	0.392791	0.11837
YER093C-A	AIM11	4	0.493416	0.188366	0.0431359	1.81956	0.470796	0.0298531	3.84506	0.847873	0.0466935
YER097W	YER097W	4	0.204338	0.230454	0.250786	-0.00114432	0.457342	0.997503	-0.291528	0.934528	0.791334
YER098W	UBP9	4	-0.26802	0.302984	0.25149	-0.323507	0.462514	0.379154	-0.144386	0.790296	0.885444
YGL199C	YGL199C	4	0.52132	0.106997	0.015146	0.285003	0.259764	0.218819	-0.208488	0.59422	0.764163
YGL214W	YGL214W	4	-1.03674	0.41904	0.0475451	-0.635908	0.535027	0.196118	0.647582	0.671765	0.409074
YGL217C	YGL217C	4	0.722003	0.246307	0.0359574	0.969263	0.126303	0.0103242	1.15392	0.196504	0.026611
YGL235W	YGL235W	4	0.821975	0.516041	0.101579	1.25196	0.678745	0.0985452	1.68115	1.18342	0.275791
YGR011W	YGR011W	4	0.969461	0.226375	0.0186893	0.862189	0.320895	0.0555526	0.358379	0.446125	0.480401
YGR018C	YGR018C	4	0.26059	0.389018	0.35833	0.232809	0.109171	0.0794939	0.200104	0.731596	0.81916
YGR022C	YGR022C	4	0.497643	0.285817	0.0874358	-0.154021	0.702313	0.774447	-1.30206	1.45052	0.437553
YGR053C	YGR053C	4	-1.01851	0.338154	0.0343507	-1.32837	0.364878	0.0331981	-1.19335	0.778728	0.252229
YGR134W	CAF130	4	-0.314598	0.825274	0.583996	-0.576933	0.916063	0.421191	-0.706919	0.762849	0.423744
YGR201C	YGR201C	4	0.726546	0.205777	0.025974	0.615086	0.282302	0.076972	0.222319	0.572419	0.736602
YGR210C	YGR210C	4	0.536541	0.751284	0.331818	0.413061	0.661584	0.424521	0.0931273	0.390816	0.842335
YGR239C	PEX21	4	0.319766	0.0915264	0.0264631	0.333605	0.242906	0.157373	0.338953	0.447244	0.506193
YGR248W	SOL4	4	-0.982274	0.206649	0.0157472	-0.971343	0.133104	0.0110351	-0.339469	0.57294	0.60485
YHL002W	HSE1	4	0.490631	0.348329	0.12432	0.216971	0.490711	0.560722	-0.321525	0.96525	0.777903
YHL024W	RIM4	4	1.15009	0.787851	0.118218	1.2164	0.565713	0.0787684	0.903369	0.608361	0.263173
YHL039W	EFM1	4	-1.25635	0.643551	0.0712813	-1.40206	0.425658	0.0396465	-0.888515	0.730123	0.326143
YHR009C	TDA3	4	-0.0774051	0.288636	0.700333	0.738082	0.269383	0.0544318	2.22143	0.33545	0.0207768
YHR016C	YSC84	4	-0.118453	0.0737351	0.100307	-0.460863	0.240078	0.0927251	-0.814337	0.571128	0.274511
YHR017W	YSC83	4	0.286887	0.297776	0.224811	0.186458	0.435207	0.572819	0.0245117	1.28741	0.988642
YHR032W	ERC1	4	0.630394	0.137046	0.0167664	0.148519	0.229917	0.410892	-0.79161	0.514765	0.251479
YHR045W	YHR045W	4	-0.109681	0.308481	0.608617	0.11373	0.311163	0.629528	0.663315	0.267097	0.123575
YHR131C	YHR131C	4	-0.689693	1.33234	0.461845	-0.556478	1.41472	0.604232	0.129648	1.24189	0.936727
YHR140W	YHR140W	4	0.364755	0.139486	0.0432402	-0.0916318	0.220765	0.584295	-0.862115	0.310582	0.106018
YHR180W	YHR180W	4	-0.561117	0.552503	0.208463	-0.499484	0.516191	0.257517	0.0095293	0.33567	0.984885
YHR181W	SVP26	4	-0.660223	0.523989	0.150286	-0.566823	0.849776	0.397866	0.0411703	1.42685	0.984885
YHR193C	EGD2	4	-1.04508	0.0408737	0.00119883	-0.593297	0.170571	0.0357327	0.775939	0.506266	0.252229
YJL003W	COX16	4	-10.5286	0.600662	0.00203314	6.34118	0.886574	0.0113935	38.6345	1.178	0.000451565
YJL007C	YJL007C	4	-0.363209	1.10526	0.634267	-0.788411	0.931982	0.307182	-1.15599	0.422125	0.108523
YJL012C	VTC4	4	-0.412426	0.5581	0.318662	-0.438849	0.335893	0.169814	-0.143117	1.46577	0.939119
YJL013C	MAD3	4	0.334068	0.423698	0.294613	0.381836	0.48915	0.336626	0.434658	0.546843	0.483981
YJL016W	YJL016W	4	0.632999	0.950043	0.360373	0.227358	0.933282	0.747272	-0.591789	0.709632	0.467387
YJL017W	YJL017W	4	0.0265035	0.177725	0.832495	-0.516338	0.263117	0.0899325	-1.26148	0.326874	0.0610101
YJL020C	BBC1	4	0.118654	0.395116	0.664234	0.000947734	0.297941	0.996976	-0.107149	0.352499	0.796774
YJL021C	YJL021C	4	1.36615	0.276102	0.0150172	1.00272	0.258905	0.0297537	-0.104137	0.326684	0.787265
YJL027C	YJL027C	4	0.791099	0.139387	0.0120113	0.308254	0.252131	0.188432	-0.711335	0.385167	0.195377
YJL028W	YJL028W	4	0.626838	0.422705	0.115414	0.609117	0.256846	0.0668899	0.414997	0.319571	0.308237
YJL161W	FMP33	4	0.566287	1.13338	0.477334	0.580012	1.08713	0.486902	0.465669	0.472897	0.399715
YJL196C	ELO1	4	0.795338	0.553673	0.121015	0.279332	0.775638	0.634827	-0.795483	0.950567	0.465971
YJR001W	AVT1	4	0.379478	0.261489	0.119331	-0.0218777	0.189992	0.883965	-0.711254	0.355627	0.174475
YJR004C	SAG1	4	-0.0619827	0.329199	0.7871	-0.300461	0.542394	0.471016	-0.514653	1.02418	0.664678
YJR005W	APL1	4	-1.2167	0.833016	0.118172	-1.19743	0.999791	0.194594	-0.438552	1.0377	0.716478
YJR009C	TDH2	4	0.416865	0.464611	0.246956	0.399958	0.553016	0.365839	0.308934	0.718309	0.711172
YJR010C-A	SPC1	4	0.474526	0.161934	0.035959	0.234597	0.120978	0.0914178	-0.242003	0.40632	0.603503
YJR010W	MET3	4	0.747611	0.221885	0.0283631	0.24659	0.275102	0.286592	-0.781063	1.10919	0.536367
YJR011C	YJR011C	4	-0.961744	0.416526	0.053611	-0.992601	0.41333	0.0656389	-0.437687	0.523414	0.465971
YJR014W	TMA22	4	-0.901026	0.0330703	0.00114838	-0.77709	0.173703	0.0232903	-0.00339529	0.515846	0.996208
YJR015W	YJR015W	4	-0.249893	0.241115	0.201951	-0.52536	0.105744	0.0198172	-0.707771	0.484123	0.265774
YJR019C	TES1	4	0.665298	0.694497	0.226276	0.426004	0.814761	0.494595	-0.142059	1.03448	0.914799
YJR020W	YJR020W	4	-0.102482	0.540761	0.785734	-0.242746	0.520019	0.540038	-0.279814	0.415562	0.556332
YJR021C	REC107	4	-0.372366	0.0654073	0.0120113	-0.570128	0.281015	0.0860907	-0.568565	0.733995	0.495453
YJR024C	MDE1	4	-0.432502	0.255062	0.0913962	-0.514453	0.139246	0.0321096	-0.298031	0.301679	0.39849
YJR025C	BNA1	4	0.297016	0.277344	0.191986	0.0772268	0.404254	0.801528	-0.281027	0.608444	0.687041
YJR030C	YJR030C	4	1.64016	0.363366	0.0171392	1.42248	0.553519	0.0591225	0.416486	1.3401	0.791987
YJR031C	GEA1	4	-0.881093	0.494781	0.0836835	-0.693287	0.358765	0.092095	0.17316	0.620939	0.814453
YJR033C	RAV1	4	0.0826492	0.374136	0.750576	0.213009	0.369736	0.455784	0.520148	0.498147	0.377592
YJR034W	PET191	4	-8.16026	0.218361	0.000825404	7.68458	0.1974	0.00147171	37.1863	0.912374	0.00026031
YJR036C	HUL4	4	0.0145065	0.429473	0.963029	-0.295544	0.407698	0.365597	-0.661583	0.352143	0.190849
YJR037W	YJR037W	4	0.961419	0.288929	0.0289063	0.593466	0.496333	0.194911	-0.324456	0.756292	0.711979
YJR038C	YJR038C	4	-0.0302124	1.25654	0.971804	-0.116617	0.969619	0.877584	-0.102354	1.11836	0.94522
YJR039W	YJR039W	4	0.423924	0.141985	0.0349277	0.264897	0.351708	0.350578	-0.0574434	0.847497	0.959513
YJR040W	GEF1	4	-0.0526974	0.457023	0.86995	0.184095	0.136009	0.160862	0.727513	1.07684	0.555116
YJR043C	POL32	4	-0.155134	0.282216	0.438829	-0.527384	0.523749	0.245086	-0.910927	0.965826	0.417224
YJR047C	ANB1	4	0.082048	1.25211	0.924836	0.359542	1.06073	0.655775	0.902908	0.310334	0.101592
YJR048W	CYC1	4	0.346877	0.474698	0.323166	2.77591	0.330489	0.00914677	6.64096	0.138248	0.000191516
YJR050W	ISY1	4	0.630372	0.636822	0.216733	0.664989	0.464224	0.148233	0.553083	0.440339	0.316901
YJR052W	RAD7	4	0.690826	0.610021	0.175536	0.505437	0.55251	0.278328	0.0114384	0.580187	0.988199
YJR053W	BFA1	4	0.543247	0.665066	0.280774	0.369623	0.931533	0.601355	-0.0339696	1.17261	0.984885
YJR054W	KCH1	4	-1.73544	0.7296	0.0510936	-1.49644	0.712975	0.0813638	-0.133724	0.96808	0.914595
YJR056C	YJR056C	4	0.560392	1.06355	0.454415	0.71213	1.2647	0.465547	0.821955	1.23191	0.561254
YJR058C	APS2	4	-0.293106	0.306841	0.227087	-0.183852	0.402708	0.548753	0.271598	0.548846	0.670111
YJR059W	PTK2	4	1.1873	0.917553	0.143978	2.44062	0.822164	0.0472752	4.01296	0.641169	0.0232008
YJR061W	YJR061W	4	0.0683617	0.235561	0.675831	-0.0724689	0.242713	0.693433	-0.193266	0.459438	0.717266
YJR062C	NTA1	4	1.13118	0.360953	0.0321072	0.836744	0.627267	0.164425	-0.0455848	0.907487	0.972347
YJR066W	TOR1	4	-2.13821	0.63264	0.0281802	-1.88654	0.838392	0.0730799	-0.308265	1.30536	0.843559
YJR070C	LIA1	4	-1.16039	0.550421	0.0623489	-1.09259	0.447298	0.0639981	-0.283193	1.33037	0.858897
YJR074W	MOG1	4	-4.13724	0.35224	0.00348098	-3.72982	0.480757	0.0102635	-0.932738	0.797961	0.339313
YJR084W	YJR084W	4	1.84615	0.899134	0.0652678	1.58937	0.79927	0.0885282	0.420839	0.680005	0.586847
YJR087W	YJR087W	4	-4.8628	0.864745	0.0121669	-3.84855	0.838266	0.0226607	0.273343	0.394837	0.544358
YJR091C	JSN1	4	0.0863744	0.252053	0.620342	0.258808	0.26042	0.248993	0.631607	0.596058	0.373172
YJR094W-A	RPL43B	4	1.03869	0.456402	0.0545833	0.853386	0.464287	0.0992864	0.190893	0.457665	0.717611
YJR095W	SFC1	4	0.911156	0.64419	0.12377	0.768781	0.472291	0.121227	0.236947	1.02241	0.84638
YJR096W	YJR096W	4	-1.01881	0.0679717	0.00240647	-0.909845	0.28091	0.0405072	-0.103054	0.822224	0.92371
YJR097W	JJJ3	4	-1.65894	0.451715	0.0243941	-2.01714	0.342241	0.0152536	-1.64914	1.19001	0.284771
YJR098C	YJR098C	4	0.59848	0.370708	0.099534	0.176855	0.369987	0.531068	-0.651188	0.531898	0.323247
YJR099W	YUH1	4	1.23592	0.417974	0.0354856	1.4171	0.362796	0.0292616	1.24668	0.343211	0.0690664
YJR100C	AIM25	4	-1.43591	0.322775	0.0175337	-1.14735	0.264112	0.0242378	0.149621	1.05546	0.911846
YJR106W	ECM27	4	-0.326139	0.934692	0.61453	-0.415673	1.08634	0.61425	-0.262973	0.918896	0.809154
YJR107W	YJR107W	4	0.0527988	0.288173	0.792673	0.0618783	0.348202	0.816438	0.189011	0.305917	0.587402
YJR116W	TDA4	4	-0.475716	0.413382	0.171491	-0.587301	0.593801	0.250155	-0.397449	0.929446	0.713253
YJR117W	STE24	4	0.0884521	0.961445	0.894442	-0.295377	0.498596	0.444602	-0.815568	1.01925	0.481241
YJR120W	YJR120W	4	0.337076	0.326248	0.20279	3.64768	0.402624	0.00810532	8.93111	0.425926	0.0013402
YJR121W	ATP2	4	-9.99359	0.878164	0.0037345	4.93314	0.787427	0.0139296	33.8514	2.37976	0.00347045
YJR123W	RPS5	4	-0.496599	0.765164	0.370776	0.125713	0.583999	0.778061	1.50251	0.462775	0.0837129
YJR124C	YJR124C	4	-0.0130443	0.093222	0.84223	0.211511	0.355561	0.442878	0.716084	0.736879	0.406843
YJR125C	ENT3	4	1.01826	0.466227	0.0585726	0.98814	0.423433	0.0687104	0.584379	1.24753	0.684734
YJR126C	VPS70	4	1.05897	0.902541	0.166727	1.12647	0.967487	0.201681	0.859525	0.83192	0.380814
YJR133W	XPT1	4	-0.382878	0.334438	0.172638	-0.59156	0.454922	0.171109	-0.602411	0.554079	0.365662
YJR134C	SGM1	4	-0.336224	0.783129	0.537565	-0.606977	0.773361	0.334359	-0.739977	0.899051	0.469681
YJR140C	HIR3	4	1.21111	0.379115	0.0309607	0.794216	0.324232	0.0636857	-0.323228	0.678918	0.679138
YJR142W	YJR142W	4	-0.66776	0.269056	0.0473206	-0.867711	0.359787	0.0652953	-0.72646	0.754739	0.409074
YJR150C	DAN1	4	1.49825	0.511029	0.0359574	1.17381	0.487331	0.0653453	0.0654291	1.16347	0.96974
YJR153W	PGU1	4	0.321316	0.89719	0.605749	0.276511	0.887362	0.682624	0.187071	0.755138	0.836594
YKL005C	BYE1	4	2.37834	0.88565	0.0411035	2.35678	0.981433	0.0656389	1.30744	0.800299	0.231436
YKL201C	MNN4	4	1.14572	0.857155	0.135776	0.90152	0.75517	0.19529	0.092699	1.05025	0.946304
YKR028W	SAP190	4	0.824294	0.648427	0.148092	1.20454	0.464633	0.0584025	1.55286	1.28375	0.327983
YLL007C	YLL007C	4	-6.74564	0.38964	0.00203314	-5.41353	0.834926	0.0135222	0.130784	1.36489	0.940695
YLL030C	RRT7	4	-0.0246226	0.178788	0.844043	-0.216918	0.227622	0.263598	-0.375164	0.925349	0.725691
YLL044W	YLL044W	4	-0.409075	0.224244	0.0804396	0.0907046	0.691962	0.865296	1.22859	1.46433	0.465971
YLL048C	YBT1	4	0.733674	0.208376	0.026072	0.432354	0.308279	0.153056	-0.268316	0.416366	0.572756
YLL049W	LDB18	4	-4.70673	0.682322	0.00888566	-3.3235	0.41606	0.00978944	1.31439	0.451159	0.101453
YLR030W	YLR030W	4	0.415428	0.402698	0.20318	0.0491088	0.593604	0.917118	-0.601513	0.707087	0.460694
YLR031W	YLR031W	4	0.795351	0.700352	0.174709	0.293571	0.589288	0.515293	-0.75844	0.298944	0.118658
YLR032W	RAD5	4	-0.246973	0.138613	0.0836532	-0.166439	0.380897	0.564889	0.220593	0.872183	0.833135
YLR034C	SMF3	4	-1.22764	0.259323	0.0157803	-0.871308	0.275611	0.0424732	0.433377	0.890128	0.672181
YLR035C	MLH2	4	-1.20139	0.218814	0.0126902	-1.13021	0.187272	0.014762	-0.295488	0.296083	0.395284
YLR036C	YLR036C	4	0.295794	0.362203	0.280786	0.0885077	0.317602	0.711954	-0.249104	0.64265	0.737504
YLR037C	PAU23	4	-0.0990597	0.413292	0.729791	-0.244986	0.454799	0.483096	-0.292795	0.618032	0.681328
YLR038C	COX12	4	-2.12973	0.222186	0.00507243	8.03326	0.3527	0.00232642	25.5005	0.534693	0.000191516
YLR039C	RIC1	1	-3.43617	NA	NA	-2.67762	NA	NA	0.342662	NA	NA
YLR040C	AFB1	4	0.891102	0.688009	0.143774	0.576696	0.438696	0.1685	-0.221274	0.305033	0.524457
YLR041W	YLR041W	4	-1.00816	0.283085	0.025515	-0.939827	0.407412	0.070253	-0.203356	0.502004	0.725942
YLR146C	SPE4	4	0.257733	0.954564	0.698139	-0.0983424	0.897736	0.890188	-0.656093	0.755495	0.450955
YLR237W	THI7	4	-2.32604	0.506521	0.0167664	-2.11486	0.70473	0.0461254	-0.510465	0.8837	0.614132
YLR246W	ERF2	4	-0.0520234	0.166373	0.651657	-0.284781	0.493522	0.455034	-0.494628	1.01573	0.672181
YLR343W	GAS2	4	0.166301	0.310926	0.449646	0.0680359	0.379847	0.815139	-0.0319844	0.494697	0.961963
YLR361C	DCR2	4	-0.437247	0.597431	0.322599	-0.346747	0.647163	0.485176	0.148504	0.653957	0.84777
YLR394W	CST9	4	0.76566	0.103409	0.00785633	0.933437	0.149585	0.0139296	0.969473	0.309415	0.0885708
YLR406C	RPL31B	4	0.685454	0.165571	0.0197716	0.408093	0.45198	0.283762	-0.230783	0.906066	0.8322
YML022W	APT1	4	-0.978199	0.591444	0.0956913	-1.06624	0.566173	0.0957281	-0.595056	0.85042	0.538333
YML038C	YMD8	4	0.81585	0.238806	0.0277201	0.805906	0.431744	0.0971792	0.532631	0.92487	0.615226
YML041C	VPS71	4	-1.48451	0.285251	0.0137534	-1.43069	0.277032	0.0184675	-0.486561	0.819179	0.604824
YML047C	PRM6	4	-0.327463	0.531457	0.391105	-0.182622	0.463333	0.603409	0.346548	0.87019	0.729264
YML067C	ERV41	4	-0.590041	0.339934	0.0878	-0.342181	0.534381	0.414703	0.479472	0.797888	0.598937
YML068W	ITT1	4	1.26611	0.230487	0.0126902	0.808775	0.324183	0.0621274	-0.400187	0.548074	0.520913
YML070W	DAK1	4	0.485591	0.600016	0.283834	0.629539	0.670798	0.268535	0.763134	1.03569	0.517111
YML071C	COG8	4	-1.5353	0.426727	0.0251933	-1.40144	0.241329	0.0156857	-0.304358	0.662379	0.688644
YML072C	TCB3	4	-2.01337	0.460652	0.0180832	-2.01073	0.605278	0.0391643	-0.892305	0.918362	0.406843
YML074C	FPR3	4	-0.200411	0.316755	0.380866	-0.212678	0.394068	0.482245	0.00297261	0.387882	0.995761
YML086C	ALO1	4	0.0431655	0.187785	0.740082	-0.106759	0.286274	0.622782	-0.229923	0.618854	0.749355
YML090W	YML090W	4	-1.03907	0.415566	0.0467236	1.0055	0.539333	0.0971792	4.92592	0.64813	0.0154458
YML094W	GIM5	1	-4.98923	NA	NA	-3.7763	NA	NA	0.725451	NA	NA
YML096W	YML096W	4	0.993835	0.704659	0.124207	0.809954	0.588183	0.156785	0.171485	0.194393	0.445688
YML097C	VPS9	4	-3.92966	0.577626	0.00906424	-2.14302	0.620512	0.0363158	2.76507	0.496903	0.0301065
YML100W	TSL1	4	0.190534	0.423074	0.518948	0.144544	0.45947	0.680025	0.116602	0.517626	0.84925
YML100W-A	YML100W-A	4	0.644872	0.176302	0.0245089	0.636929	0.268412	0.0668899	0.449747	0.900864	0.667242
YML101C	CUE4	4	0.443982	0.40996	0.189155	0.111369	0.264556	0.579046	-0.499045	0.664734	0.50971
YML102C-A	YML102C-A	4	-1.37921	0.559764	0.0479956	-1.54737	0.818066	0.0950577	-1.01026	1.04261	0.407366
YML102W	CAC2	4	-1.19101	0.330424	0.0251381	-0.973396	0.432966	0.0730997	0.0910877	1.00416	0.945295
YML103C	NUP188	4	-0.368678	0.510122	0.327163	-0.39973	0.0291825	0.00450701	-0.13263	0.999142	0.917964
YML104C	MDM1	4	-1.59372	0.403563	0.0214663	-1.11088	0.135261	0.00950841	0.574145	0.776906	0.515991
YML107C	PML39	4	2.50324	0.175048	0.00252383	2.71249	0.245515	0.00603318	1.97271	0.68289	0.101708
YML108W	YML108W	4	-0.938611	0.470877	0.0687555	-0.945527	0.448228	0.0807884	-0.36344	0.340569	0.371045
YML109W	ZDS2	4	-0.536207	0.172511	0.0324402	-0.46826	0.274124	0.111784	0.0387991	0.371086	0.936727
YML110C	COQ5	4	-11.8828	0.610666	0.00167046	6.87615	0.621616	0.00603318	42.8554	0.372965	0.000133698
YML111W	BUL2	4	0.0340665	0.105635	0.64075	-0.0122725	0.247411	0.948345	0.035076	0.476152	0.956317
YML116W	ATR1	4	0.953949	0.407386	0.0523423	0.569085	0.272041	0.0817625	-0.372331	1.47161	0.833135
YML117W	NAB6	4	0.867025	0.522328	0.0950723	0.780367	0.573738	0.159593	0.359271	0.790874	0.693986
YML117W-A	YML117W-A	4	-0.555712	0.516521	0.190987	-0.983874	0.48139	0.0848246	-1.26288	0.842441	0.260629
YML118W	NGL3	4	-0.149254	0.424217	0.611738	-0.148426	0.705077	0.782316	0.0634258	0.9718	0.961963
YML119W	YML119W	4	0.425833	0.257098	0.0954448	-0.0121064	0.1848	0.932544	-0.782617	0.593243	0.302862
YML120C	NDI1	4	0.309942	0.27109	0.172922	1.14924	0.498434	0.070253	2.483	0.77717	0.0855405
YML122C	YML122C	4	-2.11793	0.591315	0.0253149	-2.00609	0.35592	0.0164162	-0.661893	0.988834	0.559544
YML123C	PHO84	4	-2.48287	0.0894606	0.00114838	-2.17781	0.421651	0.0184675	-0.346848	0.995222	0.76522
YML124C	TUB3	4	-0.574247	0.360741	0.101637	-0.464904	0.350209	0.165705	0.126977	1.11154	0.930683
YML128C	MSC1	4	0.0237873	0.751617	0.965235	-0.0492364	0.9643	0.94686	-0.0396945	1.36913	0.984885
YML131W	YML131W	4	-0.632836	0.0439127	0.00250498	-0.773057	0.173838	0.023436	-0.552957	0.525521	0.374467
YMR004W	MVP1	4	0.718041	0.17749	0.0205893	0.438496	0.356118	0.185978	-0.219676	0.576121	0.742142
YMR048W	CSM3	4	0.974718	0.501278	0.071794	0.548227	0.601119	0.279422	-0.47001	0.530021	0.443418
YMR095C	SNO1	4	1.24757	0.542803	0.0540646	1.05668	0.612268	0.110303	0.283952	1.05435	0.821548
YMR096W	SNZ1	4	-0.7324	0.604817	0.160044	-0.823073	0.976705	0.308381	-0.475255	1.59804	0.801299
YMR098C	ATP25	4	-11.8161	0.751446	0.00224255	3.79758	0.661195	0.0159446	34.7008	0.229012	0.000133698
YMR099C	YMR099C	4	0.0858919	0.427248	0.772195	-0.10678	0.460148	0.75999	-0.319203	0.398125	0.481072
YMR100W	MUB1	4	-1.88044	0.416001	0.0171121	-1.60865	0.2544	0.0137497	-0.123068	0.512879	0.841469
YMR101C	SRT1	4	1.63395	1.38529	0.1657	1.396	1.10074	0.177723	0.360519	0.172335	0.163386
YMR102C	YMR102C	4	0.529796	0.355918	0.114539	0.577685	0.412207	0.153157	0.535816	0.554395	0.408021
YMR103C	YMR103C	4	-1.17905	0.155735	0.00763379	-1.51686	0.234423	0.0135222	-1.3488	0.485239	0.106018
YMR105C	PGM2	4	0.641924	0.492888	0.142313	0.687621	0.474464	0.145486	0.587882	0.367363	0.236312
YMR106C	YKU80	4	-0.830881	0.37598	0.0576052	-0.885248	0.451641	0.0900619	-0.431472	0.5943	0.524328
YMR109W	MYO5	4	0.757012	0.368223	0.0651209	0.349117	0.51798	0.393815	-0.533762	0.971339	0.63609
YMR111C	YMR111C	4	0.286037	0.248892	0.171846	0.0220325	0.194779	0.886093	-0.4018	0.14314	0.105476
YMR114C	YMR114C	4	0.831687	0.48958	0.091211	0.783004	0.488594	0.124528	0.439933	0.602128	0.520896
YMR116C	ASC1	4	-0.759004	2.07537	0.598773	0.229424	2.21201	0.89607	2.32051	1.4431	0.235
YMR119W-A	YMR119W-A	4	-0.260693	0.0698122	0.0235551	-0.34642	0.0803184	0.0246575	-0.219342	0.132936	0.228781
YMR120C	ADE17	4	-0.170964	0.201227	0.266397	-0.266056	0.379757	0.378496	-0.197493	0.703468	0.813233
YMR121C	RPL15B	4	-1.08059	0.623587	0.087952	-1.18101	0.968768	0.189155	-0.680049	1.23445	0.635503
YMR122C	YMR122C	4	0.0941241	0.137843	0.350519	-0.304936	0.214848	0.150147	-0.852301	0.373473	0.141624
YMR123W	PKR1	4	-2.25638	0.261884	0.00624765	-1.30987	0.492913	0.0562775	1.4399	1.25837	0.345466
YMR124W	EPO1	4	0.995292	0.680896	0.118168	0.80782	0.852616	0.265427	0.162884	1.15317	0.912357
YMR126C	DLT1	4	-0.732557	0.411579	0.0837073	-0.725527	0.405172	0.104155	-0.220966	0.445871	0.670111
YMR127C	SAS2	4	0.447938	0.316923	0.123924	0.350629	0.304223	0.204934	0.115614	0.197296	0.607134
YMR129W	POM152	4	0.330027	0.354037	0.234761	-0.0644156	0.418199	0.841688	-0.718735	0.588918	0.324762
YMR130W	YMR130W	4	-0.0399721	0.81773	0.945074	-0.0206779	0.895449	0.975254	0.167807	0.891625	0.880576
YMR132C	JLP2	4	-0.162455	0.206077	0.294613	-0.190073	0.461148	0.58747	-0.0174375	0.781089	0.987065
YMR133W	REC114	4	0.726428	0.170733	0.0189605	0.695338	0.306058	0.0718529	0.431502	0.739364	0.60824
YMR135C	GID8	4	-0.454448	0.201989	0.0560032	-0.0191485	0.282899	0.929965	1.03734	0.384795	0.110657
YMR135W-A	YMR135W-A	4	-0.0756313	0.744673	0.884505	0.0569586	0.645855	0.911605	0.444403	0.591874	0.50971
YMR136W	GAT2	4	-1.03647	0.406939	0.0452239	-1.04676	0.390207	0.0556811	-0.42264	0.245995	0.217233
YMR137C	PSO2	4	-0.20471	0.223023	0.239518	-0.179642	0.228503	0.333891	0.097963	0.550688	0.887179
YMR138W	CIN4	4	0.389639	1.18207	0.633503	0.238622	1.18844	0.790436	-0.0542522	0.775209	0.958471
YMR154C	RIM13	4	-1.16578	0.309643	0.0232334	-0.434808	0.375677	0.203583	1.44063	0.626565	0.139626
YMR171C	EAR1	4	0.0229839	0.485675	0.946494	-0.435595	0.444388	0.253417	-1.04391	0.646056	0.234501
YMR172W	HOT1	4	0.990057	0.371284	0.0416886	0.768049	0.481842	0.125722	0.0702728	0.564696	0.923896
YMR173W	DDR48	4	-0.34161	0.460177	0.316943	-0.153534	0.761408	0.790282	0.45182	1.0857	0.718336
YMR181C	YMR181C	4	0.227492	0.572478	0.567326	-0.0913119	0.901329	0.898134	-0.574636	1.2423	0.686785
YMR198W	CIK1	2	-4.91458	0.746422	0.125844	-3.58115	0.659128	0.174275	1.07764	0.157307	0.275626
YMR209C	YMR209C	4	0.859011	0.527489	0.0984851	0.859198	0.720508	0.195379	0.581246	0.99103	0.607134
YMR271C	URA10	4	-0.109815	0.234355	0.50371	-0.37064	0.522129	0.373576	-0.597478	1.09391	0.636968
YMR279C	YMR279C	4	0.340475	0.505172	0.355763	0.38939	0.504764	0.341325	0.440945	0.32103	0.28775
YMR306W	FKS3	4	1.15469	0.218364	0.0133773	0.889821	0.217311	0.0268572	0.0435116	0.430226	0.937952
YMR311C	GLC8	4	0.220895	0.231515	0.227342	0.325411	0.248908	0.169654	0.524093	0.794976	0.565141
YMR312W	ELP6	1	-8.38027	NA	NA	-7.0079	NA	NA	-0.606598	NA	NA
YMR313C	TGL3	4	-0.45802	0.813946	0.430136	-0.270058	0.733923	0.627624	0.391547	0.694181	0.623019
YMR315W	YMR315W	4	-0.383598	0.209719	0.0801022	-0.419851	0.188093	0.0740211	-0.153858	0.0733539	0.163014
YMR316C-A	YMR316C-A	4	-1.08768	0.134352	0.00688912	-1.23419	0.177034	0.0119589	-0.80368	0.627241	0.312703
YMR316C-B	YMR316C-B	4	-0.024077	0.0858966	0.686576	-0.377166	0.539513	0.37929	-0.793515	1.30635	0.593932
YMR318C	ADH6	4	-0.175725	0.320435	0.439491	-0.242369	0.223005	0.221908	-0.12588	0.658089	0.877369
YMR319C	FET4	4	-0.707245	0.104298	0.00908404	-0.463814	0.435595	0.228235	0.407554	1.06926	0.742142
YMR320W	YMR320W	4	0.150433	0.517372	0.675271	0.0535847	0.837707	0.934182	-0.0364704	1.20516	0.984885
YNL279W	PRM1	4	0.642783	0.547323	0.166644	0.717639	0.603623	0.196118	0.664241	0.878929	0.507344
YNL300W	TOS6	4	-0.051595	0.286326	0.795479	-0.305152	0.357082	0.303248	-0.548557	0.500774	0.36195
YNL316C	PHA2	4	0.797871	0.693064	0.171437	0.467112	0.713563	0.405106	-0.311885	0.592484	0.649081
YOL016C	CMK2	4	-0.0151066	0.509754	0.96705	-0.142165	0.373325	0.615238	-0.200414	0.393357	0.660206
YOL090W	MSH2	4	-2.13216	0.501585	0.0189615	-0.936835	0.368367	0.0603197	2.15167	0.287156	0.0160161
YOL114C	YOL114C	4	-0.500649	0.6546	0.306293	-0.662813	0.476597	0.15485	-0.541978	0.465604	0.339723
YOL126C	MDH2	4	-0.995755	0.42117	0.051649	-0.943696	0.323731	0.0486133	-0.239338	0.422622	0.621155
YOL141W	PPM2	4	0.689151	0.496427	0.127407	0.369387	0.479103	0.341382	-0.339273	0.92815	0.75338
YOL158C	ENB1	4	-0.208423	0.533836	0.57411	-0.406219	0.588152	0.384067	-0.484186	0.515497	0.419061
YOL159C	YOL159C	4	-0.661477	0.285909	0.0534997	-0.906024	0.365107	0.0622726	-0.839331	0.500892	0.224434
YOL160W	YOL160W	4	0.856317	0.175544	0.015146	0.592333	0.474273	0.18239	-0.107921	1.3637	0.952419
YOL163W	YOL163W	4	-0.764778	0.889825	0.261997	-0.990426	0.636003	0.130678	-0.843351	1.57302	0.644512
YOR300W	YOR300W	4	-1.27762	0.262667	0.0151758	-1.20789	0.345902	0.0355309	-0.338542	0.737953	0.689178
YOR306C	MCH5	4	0.84043	0.15732	0.0132137	0.363113	0.410202	0.291118	-0.671527	1.05512	0.577202
YOR317W	FAA1	4	0.407135	0.645434	0.381566	0.503308	0.421976	0.195379	0.598328	0.3093	0.182739
YPL132W	COX11	4	-10.6768	0.549683	0.00167046	6.17532	0.86258	0.0113935	38.5121	1.31786	0.000612982
YPL134C	ODC1	4	0.0598398	0.108177	0.436349	0.372217	0.414731	0.286197	0.982284	0.966225	0.388568
YPL183C	RTT10	4	-1.17862	0.64884	0.0809204	-0.812146	0.662102	0.187307	0.485026	0.398877	0.326432
YPL183W-A	RTC6	4	-0.348978	0.403737	0.259966	7.46842	0.294956	0.00212354	20.3112	0.721737	0.000660252
YPL189W	GUP2	4	-0.65625	0.309807	0.0618987	-0.73688	0.20966	0.0350757	-0.409874	0.157542	0.115556
YPL224C	MMT2	4	0.178696	0.211237	0.267756	0.131041	0.0672911	0.0911943	0.106167	0.551375	0.876327
YAL024C	LTE1	4	-0.172104	0.274383	0.383655	1.11936	0.526356	0.079825	2.23854	0.534831	0.0539043
YAL037C-A	YAL037C-A	4	0.561074	0.584127	0.22547	0.392505	0.37006	0.229035	-0.0429291	0.59636	0.957657
YAL044W-A	YAL044W-A	4	2.24104	0.853152	0.0429657	1.82664	0.821979	0.0745344	0.0586885	0.279667	0.861493
YAL067W-A	YAL067W-A	4	-0.544576	0.156765	0.0267589	-0.602257	0.852994	0.375516	-0.197325	1.59003	0.923947
YAR002C-A	ERP1	4	-0.542862	0.484535	0.178616	-0.637888	0.342127	0.0971792	-0.260998	1.14865	0.84777
YAR035C-A	YAR035C-A	4	0.392597	0.113432	0.0269343	0.00138372	0.595786	0.997531	-0.478304	0.927913	0.656121
YBL008W-A	YBL008W-A	4	0.372588	0.203694	0.0801022	-0.284524	0.744451	0.614518	-0.941716	1.04199	0.435669
YBL029C-A	YBL029C-A	4	0.784644	0.440143	0.0835859	0.526223	0.519888	0.243137	-0.127644	0.465083	0.818664
YBL039W-A	YBL039W-A	4	-0.0960701	0.200362	0.494244	-0.193885	0.16707	0.202905	-0.126359	0.269952	0.684972
YBL101W-C	YBL101W-C	4	0.0971389	0.378081	0.711386	0.0969183	0.468175	0.784947	0.101733	0.281373	0.755903
YBR020W	GAL1	4	-0.711086	0.297809	0.0507043	-0.737308	0.676526	0.221345	-0.195201	1.10881	0.889154
YBR056W-A	YBR056W-A	4	1.12551	0.334173	0.0283631	0.740582	0.70954	0.234503	-0.238775	1.17674	0.867401
YBR072C-A	YBR072C-A	4	0.657246	0.453301	0.11953	0.340945	0.536285	0.417183	-0.266915	0.957175	0.814453
YBR075W	YBR075W	4	-0.283728	0.686452	0.553162	-0.375858	0.57828	0.408269	-0.175149	0.204797	0.458245
YBR083W	TEC1	4	0.221871	0.551842	0.563578	0.293534	0.497595	0.446247	0.26425	0.356875	0.515618
YBR085C-A	YBR085C-A	4	1.20899	0.927475	0.142135	0.896703	0.516687	0.109538	-0.087829	0.525563	0.897511
YBR090C	YBR090C	4	0.0948248	0.259312	0.598773	0.217268	0.519262	0.581093	0.31191	0.589222	0.647177
YBR100W	YBR100W	4	-0.581089	0.497766	0.16792	-0.634596	0.834832	0.347203	-0.201543	0.885495	0.84777
YBR111W-A	SUS1	4	-1.81539	0.464805	0.0218739	-1.0238	0.824257	0.183532	0.866253	1.00495	0.454518
YBR131W	CCZ1	4	-4.0504	1.27136	0.0310488	-2.50225	0.364505	0.0122148	1.46953	1.37919	0.371267
YBR150C	TBS1	4	1.76314	0.5905	0.0349277	1.12713	0.323877	0.0357294	-0.471487	0.320281	0.264445
YBR182C-A	YBR182C-A	4	0.672449	0.837182	0.286923	0.133603	0.54911	0.747504	-0.644797	0.634602	0.388718
YBR196C-B	YBR196C-B	4	0.297755	0.409037	0.324746	-0.0466694	0.623892	0.924053	-0.427458	0.63059	0.553736
YBR200W-A	YBR200W-A	4	0.401528	0.312017	0.145255	0.0599858	0.23721	0.737984	-0.390117	0.313853	0.317988
YBR270C	BIT2	4	-0.726422	0.127567	0.0120113	-0.578275	0.444679	0.171109	0.0998108	0.672935	0.90754
YBR272C	HSM3	4	-0.881768	0.240358	0.0244308	-0.567707	0.443396	0.1753	0.336591	0.701897	0.676898
YBR275C	RIF1	4	0.341208	0.490352	0.342661	0.118631	0.374293	0.678347	-0.204402	0.849033	0.841103
YBR276C	PPS1	4	1.3026	0.591436	0.0579088	1.33616	0.758459	0.106845	0.53601	0.579485	0.424918
YBR280C	SAF1	4	-0.0480496	0.281249	0.805895	-0.0670477	0.633935	0.894046	0.0241382	0.768186	0.98455
YBR287W	YBR287W	4	0.328774	0.522626	0.38251	0.396594	0.556961	0.372247	0.291004	0.377871	0.497167
YBR296C-A	YBR296C-A	4	0.835725	0.238419	0.0262685	0.791881	0.256825	0.0439789	0.257224	0.609106	0.716692
YBR299W	MAL32	4	0.960008	0.652867	0.116997	0.719332	0.830344	0.298893	-0.042407	1.17626	0.981461
YBR301W	PAU24	4	1.65487	1.35044	0.157098	1.36164	0.770172	0.106295	0.0840828	0.696678	0.925918
YCL001W-B	YCL001W-B	2	-2.37124	0.558756	0.171846	-2.14344	0.651937	0.24158	-0.276537	1.9072	0.946304
YCL026C-A	FRM2	4	-0.611564	0.284764	0.0604906	-0.0330592	0.128506	0.733623	0.87558	0.487349	0.203066
YCL057C-A	MIC10	4	-0.0301986	1.02618	0.96705	2.81088	0.734795	0.0304639	4.9471	1.09013	0.0466935
YCR030C	SYP1	3	-0.793166	2.74564	0.731294	-0.755575	2.61753	0.75361	-0.1111	0.795944	0.929211
YCR032W	BPH1	1	-1.78377	NA	NA	-1.44056	NA	NA	0.105215	NA	NA
YCR048W	ARE1	4	-0.136248	0.508163	0.700333	-0.463158	0.766144	0.437184	-0.532786	0.631245	0.46415
YCR060W	TAH1	4	0.658838	0.715466	0.238439	0.00582545	0.503271	0.987193	-0.845335	0.683934	0.320182
YCR062W	YCR062W	4	0.545172	0.566761	0.225245	0.331813	0.985181	0.658077	-0.124899	0.913111	0.914799
YCR069W	CPR4	4	-0.433902	0.470924	0.238351	-0.369493	0.258044	0.148233	0.0471264	0.671203	0.958471
YCR073C	SSK22	4	-0.150113	0.440574	0.622477	0.125717	0.414522	0.689554	0.499191	0.64778	0.497167
YCR075C	ERS1	4	0.423854	0.280239	0.111341	0.416216	0.323277	0.173912	0.190939	0.73599	0.828757
YCR088W	ABP1	4	-0.199733	0.435121	0.511452	-0.476055	0.762945	0.424722	-0.465621	0.787608	0.60498
YCR089W	FIG2	4	-0.567953	0.451866	0.15073	-0.877086	0.488017	0.103404	-0.636949	0.389926	0.231436
YDL085C-A	YDL085C-A	4	-0.597702	0.354436	0.0924749	-0.404937	0.44201	0.278026	0.216694	0.354705	0.59175
YDL159W-A	YDL159W-A	4	-2.90893	0.151567	0.00169308	-2.9831	0.417411	0.0113935	-0.963527	0.659118	0.265774
YDL160C-A	MHF2	4	0.060785	0.581149	0.881891	0.273782	0.505518	0.480928	0.456978	0.150139	0.0934987
YDL194W	SNF3	4	0.852685	1.25275	0.351804	-0.21632	0.769924	0.710712	-1.50007	0.804407	0.192388
YDR003W-A	YDR003W-A	4	-0.0361362	0.505306	0.918106	0.262915	0.651512	0.594918	0.574686	0.477533	0.329739
YDR007W	TRP1	4	-0.687579	0.780459	0.252999	-0.978878	0.817461	0.194594	-0.643618	0.431765	0.26287
YDR034W-B	YDR034W-B	4	0.550918	0.558987	0.217859	0.159669	0.914971	0.819426	-0.428957	1.27691	0.775083
YDR048C	YDR048C	4	-2.62996	0.595103	0.0176784	-1.63616	0.387563	0.0255573	0.959705	0.358065	0.111051
YDR058C	TGL2	4	-0.250103	0.0682554	0.0244559	-0.296273	0.223387	0.165827	-0.0856358	0.326554	0.826258
YDR169C-A	YDR169C-A	4	-0.784064	0.51614	0.11043	-0.673402	0.333491	0.0865684	0.0173739	0.555369	0.98455
YDR182W-A	YDR182W-A	4	-0.354815	0.166353	0.0611491	0.0649162	0.220583	0.69669	0.682722	0.245494	0.106018
YDR194W-A	YDR194W-A	4	-0.330107	0.541007	0.394669	-0.446826	0.593256	0.350578	-0.231899	0.729758	0.788062
YDR202C	RAV2	2	-2.2041	0.783513	0.232327	-1.35011	0.646121	0.326887	0.852229	0.00829467	0.0603904
YDR205W	MSC2	4	-0.594112	0.546536	0.187929	-1.64138	0.61767	0.0562775	-1.91421	0.749873	0.118213
YDR242W	AMD2	4	0.638073	0.48739	0.141146	0.330024	0.746526	0.560722	-0.258711	0.770226	0.775083
YDR246W-A	YDR246W-A	4	0.14859	0.623001	0.731053	-0.0720946	0.0745716	0.25784	-0.261259	0.840061	0.791987
YDR326C	YSP2	4	-0.182264	0.370045	0.483434	-0.11044	0.680617	0.832085	0.138407	0.993945	0.913876
YDR379C-A	SDH6	4	-1.06208	0.370424	0.0370632	-0.947977	0.700931	0.160993	-0.0634699	1.47671	0.977121
YDR444W	YDR444W	4	-0.561489	0.266321	0.0623489	-0.205811	0.420991	0.523232	0.508096	0.402052	0.315675
YDR445C	YDR445C	4	0.366825	0.339116	0.189538	0.372172	0.332447	0.213049	0.195467	0.305044	0.573853
YDR461W	MFA1	4	-0.264889	0.4167	0.37893	-0.499461	0.132041	0.0308285	-0.414174	0.481086	0.454856
YDR493W	MZM1	4	1.53668	0.466379	0.0293213	5.50926	0.686988	0.00976085	7.3815	0.537972	0.00380006
YDR512C	EMI1	4	-7.00444	0.409793	0.00203314	7.95721	0.474238	0.00332207	23.6098	0.27506	0.000133698
YDR515W	SLF1	4	0.0693951	0.265733	0.706713	0.0361175	0.395442	0.908223	0.0362388	0.324675	0.931396
YDR524C-B	YDR524C-B	4	-0.111851	0.244709	0.512972	-1.10276	0.346101	0.0418036	-1.66681	0.54751	0.0934987
YDR524W-A	YDR524W-A	4	0.888601	0.41622	0.0610323	-0.00769728	1.0179	0.991702	-1.19192	1.19564	0.39585
YEL059C-A	SOM1	1	-11.5364	NA	NA	8.37031	NA	NA	30.6976	NA	NA
YER087C-B	SBH1	4	0.40209	0.628146	0.376077	0.263502	0.665426	0.601998	-0.040998	1.43944	0.984885
YER089C	PTC2	4	-0.38248	0.233202	0.0971611	-0.417522	0.570684	0.361537	-0.107814	1.08491	0.938336
YER175W-A	YER175W-A	4	2.07058	0.907209	0.0543748	1.38943	0.94337	0.14215	-0.453138	0.403919	0.351076
YER180C-A	SLO1	4	-0.63441	0.464174	0.130964	-0.652277	0.379125	0.110576	-0.156906	0.529203	0.802069
YER186W-A	YER186W-A	4	-0.124776	0.718284	0.802537	-0.264051	0.806711	0.667755	-0.2066	0.661331	0.791217
YFL001W	DEG1	4	-7.61807	0.673867	0.00379101	-6.84971	0.516237	0.00472225	-0.984571	0.980191	0.39244
YFL003C	MSH4	4	0.0831537	0.974966	0.9019	-0.292141	0.874533	0.660805	-0.547506	0.824912	0.56214
YFL004W	VTC2	4	0.00311417	0.427405	0.990696	-0.198592	0.598541	0.663261	-0.27403	0.7922	0.767317
YFL012W	YFL012W	4	-0.831502	0.326518	0.0452239	-1.10571	0.428247	0.0586524	-0.659151	0.55074	0.331233
YFL013C	IES1	4	-4.73842	0.215388	0.00143791	-3.57912	0.582252	0.0143516	0.586253	0.7289	0.479893
YFL014W	HSP12	4	-0.304205	0.21107	0.12041	0.319914	0.547466	0.449919	1.04992	1.06076	0.398088
YFL019C	YFL019C	4	-0.141545	0.344762	0.555729	-0.296842	0.594982	0.514658	-0.239381	0.921738	0.828757
YFL033C	RIM15	4	-0.483697	0.346048	0.125844	-1.2022	0.281268	0.025047	-1.31449	0.776435	0.221976
YFL041W-A	YFL041W-A	4	-1.04106	0.495991	0.0628066	-1.30155	0.697334	0.0971792	-0.700959	1.10211	0.577202
YFL042C	YFL042C	4	-0.159699	0.69547	0.740226	-0.0254892	0.545329	0.951241	0.252709	0.962948	0.826258
YFL060C	SNO3	4	-0.864495	0.361075	0.0504349	-0.738185	0.742045	0.248723	0.0191761	0.845252	0.987065
YFL063W	YFL063W	4	0.0535052	0.226465	0.732471	-0.0160651	0.482187	0.964544	-0.031119	0.663198	0.974061
YFR011C	MIC19	4	0.492516	0.438173	0.17782	1.89881	0.728318	0.0577881	2.64338	0.992638	0.111773
YFR012W-A	YFR012W-A	4	-0.193316	0.300286	0.373871	-0.0761061	0.368133	0.785044	0.212989	0.236598	0.436104
YFR013W	IOC3	4	0.0627412	0.290963	0.756876	-0.297691	0.307509	0.257473	-0.528323	0.183263	0.102054
YFR024C	YFR024C	4	0.0521484	0.543308	0.890908	-0.425102	0.24574	0.109866	-0.732477	0.435303	0.222921
YFR030W	MET10	4	0.166365	0.316878	0.455925	-0.0319694	0.433423	0.925166	-0.217285	0.371769	0.607677
YFR032C-B	YFR032C-B	4	1.34192	0.734924	0.0803352	1.07081	0.916672	0.200655	0.0244478	0.992152	0.987065
YGL041C-B	YGL041C-B	4	0.642137	0.598305	0.191357	-0.494654	0.610184	0.322108	-1.68232	0.835519	0.173412
YGR028W	MSP1	4	-0.935367	0.444848	0.0625892	-0.508271	0.623317	0.320536	0.514207	0.616638	0.467387
YGR032W	GSC2	4	1.60032	0.912181	0.0862193	1.78841	1.10299	0.122129	0.894605	0.624215	0.272869
YGR035W-A	YGR035W-A	4	0.437511	0.747227	0.413254	0.0834709	0.628021	0.863209	-0.400375	0.10075	0.0584646
YGR038W	ORM1	4	-0.352106	0.36726	0.226089	-0.144061	0.257223	0.467277	0.319611	0.45365	0.536367
YGR040W	KSS1	4	0.218458	0.148947	0.117495	-0.0359173	0.388268	0.906907	-0.297381	0.812451	0.75338
YGR050C	YGR050C	4	-0.362846	0.475787	0.307194	0.010592	0.601212	0.981348	0.600622	0.373513	0.235
YGR106C	VOA1	4	-0.165756	0.574317	0.677598	-0.278082	0.384984	0.366016	-0.173056	0.73786	0.844903
YGR110W	CLD1	4	-0.616707	0.341538	0.0818129	-0.304449	0.111326	0.0544554	0.41621	0.400157	0.379385
YGR117C	YGR117C	4	1.56523	0.341467	0.0167664	1.37573	0.59957	0.0706829	0.234465	0.570098	0.721539
YGR121W-A	YGR121W-A	4	0.987616	0.889073	0.181188	0.648823	0.837232	0.33971	-0.202486	0.393473	0.656189
YGR122C-A	YGR122C-A	4	-0.871864	0.197111	0.0176784	0.191044	0.627122	0.688866	1.62719	1.18105	0.287112
YGR146C-A	YGR146C-A	4	0.125283	0.557534	0.746177	0.494226	0.43435	0.208222	0.745226	0.686941	0.365958
YGR169C-A	LSO2	4	-1.40557	0.0818889	0.00203314	-1.88303	0.333608	0.0164162	-1.18777	0.576379	0.16766
YGR238C	KEL2	4	-1.56268	0.482713	0.0303223	-1.12822	0.878935	0.174728	0.331107	0.893271	0.750159
YGR254W	ENO1	4	0.100387	0.282794	0.608975	-0.0552889	0.450628	0.87467	-0.164532	0.579863	0.81085
YGR258C	RAD2	4	0.0719526	0.353254	0.769572	0.146823	0.207214	0.37407	0.222979	0.168441	0.301707
YGR271C-A	EFG1	1	-16.6116	NA	NA	-15.2838	NA	NA	-2.82944	NA	NA
YGR271W	SLH1	4	-1.30036	0.351306	0.0240508	-1.32926	0.699625	0.0944299	-0.383717	0.8862	0.709241
YGR273C	YGR273C	4	0.207561	0.245304	0.267742	0.475957	0.688579	0.384028	0.598032	1.13306	0.647707
YGR276C	RNH70	4	0.953842	0.351896	0.0406805	0.350211	0.597483	0.448652	-0.668368	0.636352	0.374772
YGR291C	YGR291C	4	0.667241	1.12019	0.405337	0.719775	1.2471	0.455034	0.37035	0.680371	0.637846
YGR292W	MAL12	4	-0.510422	0.435426	0.166977	-0.505493	0.771619	0.404951	-0.0790193	1.02968	0.953327
YHL015W-A	YHL015W-A	4	-0.259115	0.485217	0.449957	0.0258611	0.740763	0.962868	0.4809	0.968861	0.66945
YHR007C-A	YHR007C-A	4	-0.397521	0.330999	0.161864	0.117098	0.418546	0.711008	0.832536	0.596734	0.282022
YHR050W-A	YHR050W-A	4	-1.18888	0.857448	0.127599	7.96509	0.441732	0.00297796	15.4394	1.59078	0.00881798
YHR086W-A	YHR086W-A	4	0.740948	1.01881	0.324791	0.421783	0.730723	0.455034	-0.24572	0.90898	0.821464
YHR132W-A	IGO2	4	0.71403	0.583751	0.15741	-0.0955534	0.772905	0.873637	-1.09731	0.824197	0.299663
YHR146W	CRP1	4	-0.37064	0.488608	0.309179	-0.459639	0.55115	0.312614	-0.19689	1.11267	0.888443
YHR171W	ATG7	4	-0.475181	0.823126	0.419778	-0.558266	0.593713	0.268336	-0.219347	0.367383	0.602186
YHR175W-A	YHR175W-A	4	0.658963	0.342471	0.0732603	0.905713	0.64976	0.15442	0.701688	1.11656	0.580917
YIL002W-A	YIL002W-A	4	0.534448	0.318845	0.0934499	0.58946	0.250258	0.0675955	0.33317	0.512155	0.571552
YIL046W-A	YIL046W-A	4	0.753833	0.229813	0.0295911	0.589979	0.27761	0.0799031	0.0253317	0.352493	0.957657
YIL058W	YIL058W	4	-0.604398	0.348204	0.0878	-0.483911	0.186289	0.0581527	0.0903357	0.655672	0.91468
YIL092W	YIL092W	4	0.499399	0.0821522	0.010947	0.827422	0.12572	0.0132901	0.791626	0.251853	0.0882303
YIL134C-A	YIL134C-A	4	1.09796	0.381684	0.0369219	0.901266	0.12719	0.0115592	0.076267	0.378089	0.867823
YIR021W-A	YIR021W-A	4	0.998152	0.574117	0.0876214	0.637837	0.926983	0.385496	-0.236202	1.08576	0.855696
YIR023W	DAL81	4	-1.68623	0.402305	0.0193705	-0.287015	0.147793	0.0912025	1.95127	0.718864	0.110155
YIR030C	DCG1	4	0.406849	0.291786	0.126391	0.810573	0.181035	0.0232903	0.892897	0.474113	0.19067
YIR032C	DAL3	4	-0.346064	0.26606	0.14265	-0.276694	0.307047	0.284419	0.0830673	0.340758	0.838903
YIR043C	YIR043C	4	0.772479	0.531096	0.118912	0.838065	0.168095	0.0196814	0.425632	0.73979	0.615226
YIR044C	YIR044C	4	1.78386	0.83065	0.0604906	2.00102	0.687742	0.0488157	1.00187	0.636281	0.242635
YJL012C-A	YJL012C-A	4	0.208205	0.195167	0.193126	0.0288725	0.52222	0.943242	-0.171558	0.94716	0.886467
YJL042W	MHP1	4	0.66393	0.741793	0.247623	0.812125	0.635705	0.175987	0.533789	0.757396	0.536367
YJL047C-A	YJL047C-A	4	0.405934	0.45049	0.245643	0.192478	0.618073	0.682624	-0.168521	0.879029	0.877175
YJL062W-A	COA3	4	-15.414	1.16226	0.00288615	11.6151	0.721272	0.00360685	41.7332	0.958017	0.00021988
YJL070C	YJL070C	4	0.443466	0.244879	0.0813506	0.655313	0.515489	0.177218	0.574425	0.748045	0.498923
YJL077W-B	YJL077W-B	4	0.0630977	0.261865	0.728768	0.37116	0.151739	0.0638752	0.621147	0.285797	0.154595
YJL078C	PRY3	4	1.00715	0.623484	0.0994744	0.336779	0.631824	0.487227	-0.766484	0.716764	0.370294
YJL094C	KHA1	4	0.529096	0.235254	0.0560218	0.248243	0.702503	0.642534	-0.245961	1.2957	0.878959
YJL101C	GSH1	4	-33.394	0.564204	0.000604357	-23.2521	0.998224	0.00229835	7.08749	1.376	0.0353495
YJL103C	GSM1	4	1.33236	0.906759	0.117149	0.500062	0.382326	0.169603	-0.943395	0.740719	0.314288
YJL105W	SET4	4	0.024169	0.322262	0.914101	-0.283723	0.286382	0.249747	-0.450025	0.758689	0.604824
YJL127C-B	YJL127C-B	4	-0.144696	0.499925	0.676684	0.479761	0.283555	0.113736	1.10028	1.13481	0.407159
YJL128C	PBS2	4	2.14352	0.561412	0.0227594	1.03322	0.495613	0.0819343	-1.16822	1.01275	0.342905
YJL136W-A	YJL136W-A	4	-0.406783	0.63045	0.372951	-0.265278	0.196982	0.162062	0.188143	0.752657	0.834899
YJL137C	GLG2	4	-1.01039	1.04151	0.222816	-0.680119	0.601588	0.210072	0.324322	0.629465	0.656169
YJL141C	YAK1	4	-0.0238925	0.213539	0.873511	-0.965441	0.355407	0.0548607	-1.55449	0.861397	0.201573
YJL151C	SNA3	4	0.369137	0.461411	0.288636	-0.0230968	0.414156	0.942798	-0.487381	0.920464	0.647177
YJL177W	RPL17B	4	2.68236	0.496882	0.0129992	2.91526	0.531666	0.0170031	1.30933	0.319485	0.0551729
YJL189W	RPL39	4	2.0693	0.392882	0.013482	2.48545	0.947806	0.0573829	1.43307	1.24377	0.343296
YJR003C	YJR003C	4	0.11701	0.587717	0.774657	0.132325	0.828197	0.83515	0.134645	1.29357	0.936727
YJR005C-A	LSO1	4	-0.0909971	0.474243	0.783129	0.100537	0.894671	0.886593	0.372708	1.29166	0.807433
YJR135W-A	TIM8	4	-0.482607	0.807542	0.403976	-0.10472	0.385111	0.718272	0.570897	0.557355	0.385235
YJR151W-A	YJR151W-A	2	-2.04315	0.524559	0.183	-0.35157	0.725158	0.712781	2.34255	0.508597	0.332608
YKL018C-A	YKL018C-A	4	-0.0727839	0.209039	0.615292	-0.318946	0.206899	0.132331	-0.374149	0.512454	0.520913
YKL068W-A	YKL068W-A	4	-0.923453	0.417798	0.0576052	-0.513725	0.421861	0.189324	0.488063	0.752025	0.571558
YKL096C-B	YKL096C-B	4	0.942977	0.251252	0.0233291	0.60134	0.164682	0.033001	-0.221307	0.553357	0.728034
YKL096W-A	CWP2	4	1.05678	0.483476	0.0585408	0.792125	0.780513	0.242185	-0.0534302	0.895492	0.966623
YKL106C-A	YKL106C-A	4	-0.366345	0.371514	0.217785	-0.304718	0.424233	0.36861	0.0634258	0.836282	0.954391
YKL115C	YKL115C	4	-0.238426	0.491729	0.489217	-0.220859	0.349854	0.420437	0.0275929	0.88566	0.98455
YKL215C	OXP1	4	-0.430232	0.479371	0.246912	-0.833807	0.565325	0.141835	-0.756344	1.04264	0.524457
YKL220C	FRE2	4	-0.360201	0.216491	0.0948066	-0.555544	0.512961	0.222811	-0.376471	0.842045	0.700903
YKR010C	TOF2	4	-0.297538	0.230152	0.144192	-0.374505	0.25608	0.143752	-0.153388	0.754866	0.867401
YKR023W	YKR023W	4	-0.693999	0.265131	0.0431882	-0.440241	0.497742	0.291167	0.291508	0.532129	0.636397
YKR027W	BCH2	4	0.840864	0.480073	0.0864903	0.570244	0.480645	0.196579	-0.131072	0.228846	0.616998
YKR039W	GAP1	4	-0.52314	0.12755	0.0200846	-0.4432	0.430363	0.238249	0.0459812	0.71101	0.961963
YKR040C	YKR040C	4	0.268009	0.420032	0.377483	0.608692	0.193134	0.0426852	0.74118	0.713851	0.379385
YKR041W	YKR041W	4	0.823985	0.376244	0.0583957	1.023	0.454647	0.0730799	0.671114	0.542617	0.320182
YKR053C	YSR3	4	0.978019	0.489571	0.068599	0.653528	0.913508	0.370251	-0.180892	1.14732	0.900703
YKR094C	RPL40B	1	-0.11102	NA	NA	-0.0761006	NA	NA	0.097188	NA	NA
YKR095W	MLP1	4	1.90719	0.853111	0.0566761	1.4988	1.06791	0.153007	-0.0351782	1.1079	0.98455
YKR096W	ESL2	4	-0.315794	0.246632	0.146522	-0.599754	0.391493	0.133563	-0.514973	0.970947	0.647177
YLR110C	CCW12	4	-4.74793	0.398543	0.00341456	-3.38508	0.506734	0.0129724	0.933256	0.67777	0.287112
YLR312C-B	YLR312C-B	4	4.6248	0.687601	0.00919172	3.96902	0.483981	0.00950841	0.387599	0.868834	0.701274
YLR455W	PDP3	4	1.67284	0.538456	0.0324552	1.4284	0.697165	0.0844837	0.173586	1.39366	0.923896
YML066C	SMA2	4	0.212715	0.110266	0.0729826	0.118956	0.883382	0.861897	-0.023022	1.42813	0.990856
YMR037C	MSN2	4	-0.478078	0.111258	0.0186317	-0.904342	0.252386	0.0338667	-0.810285	0.302064	0.111025
YMR074C	YMR074C	4	-0.0138654	0.1246	0.873982	-0.0114249	0.265743	0.954598	0.0716663	0.427624	0.897511
YMR104C	YPK2	4	0.127512	0.479632	0.702314	0.121482	0.578587	0.782702	0.101223	0.874805	0.929394
YMR105W-A	YMR105W-A	4	-0.861343	0.319727	0.0409716	-1.16608	0.121267	0.00751052	-0.720956	0.271228	0.112009
YMR118C	SHH3	4	0.17247	1.23648	0.84223	-0.254656	1.30572	0.797737	-0.608747	0.693743	0.44745
YMR119W	ASI1	4	0.552451	1.04134	0.451946	0.0326256	1.03545	0.966305	-0.649544	0.535778	0.327477
YMR322C	SNO4	4	-0.663662	0.244409	0.0405132	-0.423034	0.413133	0.240018	0.2784	0.788409	0.762214
YNL011C	YNL011C	4	0.00153911	0.19065	0.989773	-0.31277	0.453129	0.384277	-0.468122	0.712463	0.566696
YNL018C	YNL018C	4	-0.512868	0.442055	0.169487	-0.436433	0.449417	0.256613	0.0431602	0.371285	0.929211
YNL047C	SLM2	4	1.36623	0.839258	0.0984851	0.659014	0.849033	0.339093	-0.717766	0.440599	0.23225
YNL051W	COG5	4	-1.15382	0.295136	0.0218654	-0.807841	0.522693	0.131893	0.306563	0.699796	0.706555
YNL052W	COX5A	4	0.519337	0.512974	0.209366	2.28534	0.285481	0.00976957	3.2702	0.804301	0.0560288
YNL053W	MSG5	4	1.33747	0.414305	0.0303638	0.202942	0.930886	0.775294	-1.46143	1.77041	0.469121
YNL055C	POR1	4	-14.2898	0.578946	0.00126696	-9.19748	0.444985	0.00239139	4.36762	0.798372	0.0313652
YNL056W	OCA2	4	4.27162	0.451964	0.00524931	3.09107	0.98122	0.0426852	-0.624877	1.27651	0.672017
YNL065W	AQR1	4	1.14864	1.15801	0.215955	0.755928	0.956703	0.331654	-0.244935	0.214614	0.345466
YNL066W	SUN4	4	-0.139141	0.346291	0.563715	-0.465684	0.461173	0.244165	-0.533057	0.400758	0.299752
YNL067W	RPL9B	4	6.20131	0.360667	0.00203314	6.27927	0.524026	0.00525175	2.14112	1.13988	0.190849
YNL067W-B	YNL067W-B	4	4.3667	0.311506	0.00261232	4.1443	0.37859	0.00606688	1.05217	0.817867	0.311843
YNL068C	FKH2	4	-1.43544	0.377404	0.0228802	-1.5428	0.356974	0.0245558	-0.560749	0.708948	0.48568
YNL072W	RNH201	4	0.574511	1.04547	0.438829	0.210326	1.24536	0.825062	-0.375064	1.10539	0.77259
YNL074C	MLF3	4	1.12717	0.27606	0.0202211	0.936358	0.639523	0.143516	0.0954923	0.953387	0.938336
YNL078W	NIS1	4	0.166884	0.633168	0.705251	0.270778	0.520041	0.496565	0.302505	0.511911	0.60498
YNL082W	PMS1	4	-0.848436	0.401209	0.0620244	-0.597371	0.276129	0.0778746	0.238683	0.560339	0.715172
YNL083W	SAL1	4	0.563047	0.295452	0.0747374	0.738902	0.21469	0.0363768	0.549863	0.510287	0.368857
YNL085W	MKT1	4	0.767709	0.336323	0.0543748	0.397354	0.476606	0.312653	-0.32538	0.431053	0.507344
YNL086W	SNN1	4	-0.944616	0.406456	0.0530646	-0.458015	0.772037	0.443957	0.613629	1.15771	0.647177
YNL087W	TCB2	4	0.258252	0.343756	0.312699	0.505117	0.540586	0.270122	0.576832	0.48966	0.335584
YNL089C	YNL089C	4	3.66315	1.64448	0.0570791	1.64209	1.00382	0.120193	-2.25987	0.704184	0.0853808
YNL090W	RHO2	4	0.810821	0.323483	0.0465873	0.724233	0.670185	0.22329	0.175962	0.973483	0.886467
YNL091W	NST1	4	-4.11817	0.45958	0.00577604	-3.9618	0.416697	0.00751052	-0.944536	0.174366	0.0318536
YNL093W	YPT53	4	-0.122043	0.425744	0.679656	-0.46446	0.141918	0.039949	-0.555016	0.597213	0.423049
YNL095C	YNL095C	4	1.19863	0.641187	0.077163	0.986006	0.707937	0.154629	0.0802984	0.824035	0.939119
YNL096C	RPS7B	4	-0.804215	0.506194	0.101877	-1.14698	0.127881	0.00821039	-0.76851	0.873817	0.446762
YNL099C	OCA1	4	1.20606	0.312726	0.0224238	0.580544	0.675865	0.301605	-0.627285	0.774057	0.475488
YNL100W	MIC27	4	1.17662	0.58444	0.067655	1.761	0.499876	0.0348903	1.44374	0.688189	0.163014
YNL105W	RRT16	4	-0.97356	0.131714	0.00785633	-0.175319	0.576092	0.688866	1.14041	1.01949	0.351808
YNL106C	INP52	4	-0.0322338	0.767876	0.953282	0.733854	0.744249	0.251212	1.37889	0.937657	0.264445
YNL107W	YAF9	4	-0.163499	0.762022	0.758206	0.424161	0.635506	0.397657	1.03115	1.30159	0.485548
YNL109W	YNL109W	4	1.06918	0.197902	0.0129929	1.1214	0.415768	0.0553091	0.495242	0.611313	0.475488
YNL111C	CYB5	4	2.2494	0.296364	0.00763379	1.40321	0.376683	0.031733	-0.681087	0.633925	0.369582
YNL115C	YNL115C	4	0.0656051	0.397524	0.812513	-0.0661368	0.617625	0.892561	-0.134236	0.914991	0.908268
YNL121C	TOM70	4	2.22685	0.790117	0.0380404	4.18414	0.568389	0.0108705	4.13196	0.637455	0.0217883
YNL125C	ESBP6	4	-0.283711	0.352559	0.28614	0.00579668	0.401202	0.983924	0.481015	0.508671	0.416187
YNL130C	CPT1	4	-0.270033	0.600499	0.519387	-0.115869	0.69602	0.827743	0.252584	0.79679	0.788187
YNL140C	YNL140C	4	-7.04134	0.336527	0.00149675	-7.10342	0.667843	0.00627167	-2.23238	0.697579	0.0855405
YNL142W	MEP2	4	-0.245457	0.544823	0.518948	-0.274496	0.899643	0.688866	-0.0547324	1.0511	0.971005
YNL315C	ATP11	4	-13.0033	1.79955	0.00808663	9.16761	1.41542	0.0135222	34.1327	0.334381	0.000133698
YNR033W	ABZ1	4	0.319883	0.253612	0.150063	0.367507	0.445861	0.316576	0.253506	0.664495	0.742142
YNR055C	HOL1	4	-0.510115	0.422479	0.160601	-1.083	0.36652	0.0475076	-1.07236	0.945091	0.346721
YNR069C	BSC5	4	0.108718	0.772191	0.841199	-0.309006	1.0023	0.685734	-0.612477	0.935922	0.568231
YOL077W-A	ATP19	4	0.30876	0.252478	0.157418	0.449871	0.30197	0.139113	0.41077	0.376308	0.363299
YOL125W	TRM13	4	0.141037	0.929733	0.829553	-0.160516	0.964083	0.827743	-0.402654	0.785763	0.657906
YOL147C	PEX11	4	-0.408054	0.345067	0.165181	-0.0685117	0.265176	0.732255	0.528236	0.710513	0.513469
YOL151W	GRE2	8	1.12987	0.716266	0.0173993	0.743495	0.815106	0.102599	-0.239899	0.721288	0.655961
YOL152W	FRE7	8	0.0833453	1.18995	0.882452	-0.170761	0.963747	0.724824	-0.339083	0.426984	0.263578
YOL153C	YOL153C	4	0.421717	1.16982	0.60402	0.336124	0.804988	0.581969	0.0562425	0.988586	0.969164
YOL155C	HPF1	4	0.220103	0.625836	0.611747	0.0230083	0.796734	0.969515	-0.198383	0.861081	0.846989
YOL166C	YOL166C	4	-0.751713	0.121685	0.0105998	-0.861008	0.514896	0.115375	-0.350709	0.800653	0.706555
YOR267C	HRK1	4	-0.146445	0.564907	0.708586	0.1875	0.272357	0.385342	0.600254	0.688751	0.449303
YOR268C	YOR268C	4	0.551605	0.497505	0.181793	0.367878	0.596069	0.429019	-0.0719454	1.29113	0.969751
YOR269W	PAC1	4	-2.70858	0.322637	0.00653084	-1.81711	0.675099	0.0554518	0.759238	0.871622	0.449303
YOR271C	FSF1	4	-10.8044	0.456322	0.00131492	-9.19766	0.51142	0.00297796	-0.537473	0.554347	0.407159
YOR273C	TPO4	4	0.503323	0.484897	0.201525	0.171744	0.285719	0.438499	-0.341218	0.499486	0.550855
YOR275C	RIM20	4	-3.11208	0.251954	0.00328582	-2.5479	0.365176	0.0119589	0.0706012	0.550588	0.922337
YOR293C-A	YOR293C-A	4	-0.112788	0.552069	0.769087	-0.275726	0.742741	0.623983	-0.243545	0.605348	0.727015
YPL004C	LSP1	4	-0.333405	0.480182	0.343614	-0.378165	0.76554	0.518753	-0.109208	0.78782	0.914388
YPL027W	SMA1	4	1.05216	0.793299	0.137724	0.667144	1.22758	0.479171	-0.261819	1.07895	0.839927
YPL034W	YPL034W	4	0.293677	0.353249	0.274734	0.555137	0.746345	0.355759	0.612981	1.24436	0.670513
YPL036W	PMA2	4	1.02224	0.363016	0.0380404	0.443998	0.793054	0.467277	-0.603371	0.92884	0.571558
YPL078C	ATP4	4	-16.8522	1.12942	0.00240647	3.41153	0.949454	0.0337784	29.6525	3.04721	0.00881094
YPL137C	GIP3	4	0.719916	0.245857	0.0360034	0.336912	0.503071	0.396573	-0.362042	0.816677	0.703274
YPL158C	AIM44	4	-0.867477	0.829675	0.199209	2.31548	1.00939	0.0706829	5.27361	0.814994	0.0217883
YPL183W-A	RTC6	4	-1.96142	0.251361	0.00742699	10.0446	0.338546	0.00212354	20.102	0.534029	0.000320696
YPL194W	DDC1	4	-0.524536	0.436809	0.161864	-0.217109	0.788191	0.715284	0.436668	0.760537	0.615699
YPR007C	REC8	4	2.14134	1.08814	0.0704523	1.161	1.04081	0.213813	-0.945453	0.695293	0.292377
YPR008W	HAA1	4	0.111713	0.427333	0.706523	-0.143234	0.729996	0.796418	-0.331677	1.00888	0.78084
YPR011C	YPR011C	4	-0.707047	0.255394	0.0392204	-1.15617	0.593866	0.0911943	-0.921036	0.932061	0.39849
YPR013C	CMR3	4	-1.3501	0.37701	0.0253149	-1.28493	0.812696	0.127104	-0.237486	0.972043	0.838783
YPR021C	AGC1	4	-1.6462	0.7884	0.0632988	-1.04984	0.981711	0.226693	0.583388	0.589096	0.39801
YPR022C	YPR022C	4	-0.735394	0.240691	0.033439	-0.417224	0.458163	0.279961	0.389336	0.917203	0.715172
YPR023C	EAF3	4	-0.879309	0.165323	0.0132767	-0.673482	0.644842	0.234308	0.151269	0.906628	0.897511
YPR026W	ATH1	4	0.391276	0.414913	0.231363	0.375792	0.662302	0.462192	0.167283	0.791711	0.860676
YPR037C	ERV2	4	0.461278	0.142249	0.030239	-0.198391	0.356538	0.469343	-0.918433	0.415496	0.149793
YPR050C	YPR050C	4	-0.85032	0.628153	0.133214	0.616581	0.696401	0.291118	2.32851	0.559632	0.0540662
YPR064W	YPR064W	4	-1.16634	0.720914	0.0993559	-1.65328	0.40872	0.0272713	-1.12941	0.678151	0.22616
YPR091C	NVJ2	4	1.64354	1.27023	0.143978	1.21226	0.923718	0.16888	-0.156801	0.53413	0.803446
YPR118W	MRI1	4	-0.554483	0.530812	0.199369	-0.560661	0.460279	0.189309	-0.111866	0.702295	0.900703
YPR133W-A	TOM5	4	-7.63438	0.554861	0.00272824	-12.6235	0.605467	0.00239139	-10.8886	0.977389	0.00637936
YAL002W	VPS8	4	-4.74124	0.43936	0.00409578	-3.39777	0.449004	0.0104549	1.02755	0.507864	0.172252
YAL007C	ERP2	4	1.83511	1.50216	0.157649	1.46788	1.29254	0.208572	0.0688008	0.296499	0.84638
YAL008W	FUN14	4	-0.702153	0.591645	0.164241	-0.772442	0.683426	0.210088	-0.372182	0.47751	0.492304
YAL009W	SPO7	4	-1.30439	0.587687	0.057375	-0.565174	0.729997	0.339861	1.17367	0.655253	0.203814
YAL014C	SYN8	4	-0.0516169	0.209496	0.722532	0.149321	0.276504	0.482058	0.516664	0.291681	0.207262
YAL015C	NTG1	4	-0.0304446	0.271384	0.873328	-0.0712639	0.471025	0.843504	-0.0140555	1.1594	0.994188
YAL017W	PSK1	4	0.079309	0.260516	0.659863	0.0214996	0.239534	0.91015	-0.00423863	0.631334	0.996208
YAL018C	LDS1	4	0.555027	0.812122	0.35019	0.299855	0.983204	0.688866	-0.238001	1.00701	0.843559
YAL020C	ATS1	4	-1.75304	0.264917	0.00944894	-1.31885	0.157509	0.00914677	0.297177	0.235727	0.316002
YAL027W	SAW1	4	0.43465	0.314305	0.128321	0.419662	0.389555	0.224139	0.246032	0.350567	0.536499
YAL029C	MYO4	4	0.310094	0.379861	0.280874	0.185292	0.334031	0.470406	-0.0534269	0.476488	0.931396
YAL030W	SNC1	4	-1.14226	0.152428	0.00765622	-1.28629	0.346336	0.0318175	-0.728393	0.616405	0.334179
YAL031C	GIP4	4	2.14299	0.779931	0.0397323	2.07911	0.859408	0.0651605	0.880267	0.687949	0.313373
YAL036C	RBG1	4	-0.206598	0.369875	0.432473	-0.253859	0.477708	0.488317	-0.1051	0.671235	0.900703
YAL037W	YAL037W	4	0.231639	0.247407	0.233277	0.165377	0.248231	0.398268	0.0431742	0.808705	0.970166
YAL039C	CYC3	4	-9.69179	0.335507	0.00114838	6.89903	0.2917	0.00225509	32.9262	0.446095	0.000133698
YAL040C	CLN3	4	1.47657	0.324083	0.0169426	0.767196	0.284039	0.0553091	-0.851379	0.804304	0.373589
YAL042W	ERV46	4	1.74243	1.49007	0.167458	1.71691	1.42007	0.191477	0.791611	0.709674	0.352574
YAL043C-A	YAL043C-A	4	-1.08508	0.181967	0.0112059	-1.05347	0.165871	0.0137497	-0.311257	0.37708	0.469121
YAL045C	YAL045C	4	1.73708	0.31025	0.0122535	1.71367	0.227946	0.0104752	0.794	0.331368	0.130541
YAL048C	GEM1	4	-3.3864	0.293092	0.00358614	-1.04295	0.309901	0.0381494	3.85048	0.716778	0.0323552
YAL049C	AIM2	4	-0.0111017	0.533924	0.975449	-0.271241	0.436602	0.426603	-0.49546	0.450381	0.359862
YAL051W	OAF1	4	0.0318962	0.228302	0.84223	0.0698873	0.42909	0.831606	0.189086	0.766649	0.836826
YAL053W	FLC2	4	-0.263091	0.280928	0.233248	-0.431823	0.271846	0.126131	-0.400974	0.507873	0.485968
YAL055W	PEX22	4	-0.826562	0.60377	0.130663	-0.848915	0.441722	0.0925818	-0.319263	0.36325	0.446762
YAL056W	GPB2	4	2.04231	0.788386	0.0439154	1.83038	0.743804	0.0633593	0.505798	0.442995	0.345466
YAL059W	ECM1	4	1.15218	0.237017	0.0151763	0.570154	0.330958	0.110576	-0.708127	0.913161	0.495111
YAL060W	BDH1	4	-0.786985	0.33538	0.0521511	-0.896673	0.254459	0.0348903	-0.497091	0.980518	0.662174
YAL061W	BDH2	4	-0.342503	0.274156	0.152011	-0.490498	0.293965	0.115787	-0.389218	0.661072	0.60642
YAL062W	GDH3	4	0.214904	0.192956	0.180436	-0.0605649	0.271352	0.770131	-0.431345	0.87713	0.670574
YAL065C	YAL065C	4	0.0567836	0.521109	0.876232	-0.222059	0.341253	0.407753	-0.50769	0.593299	0.458146
YAL066W	YAL066W	4	1.50227	0.360535	0.0195606	1.14497	0.289091	0.0285205	-0.0538864	0.525463	0.937235
YAL067C	SEO1	4	-0.608414	0.462889	0.140211	-0.722334	0.571321	0.178669	-0.428833	0.98154	0.707171
YAR003W	SWD1	4	0.0981691	0.283114	0.616921	0.47744	0.186829	0.0597509	0.980129	0.164557	0.0259489
YAR014C	BUD14	4	-2.50622	0.565868	0.0176752	-2.07984	0.761407	0.0544554	-0.0480158	0.728146	0.961963
YAR023C	YAR023C	4	0.561991	0.431077	0.142135	0.438715	0.344937	0.1772	0.0596014	0.362667	0.898751
YAR027W	UIP3	4	-0.197374	0.303253	0.369672	-0.00483672	0.399593	0.986647	0.434473	0.760879	0.617566
YAR028W	YAR028W	4	-0.361042	0.570958	0.38092	-0.43837	0.511359	0.302315	-0.23946	0.202258	0.333777
YAR031W	PRM9	4	0.321628	0.362366	0.250587	0.314783	0.231443	0.159593	0.215034	0.569737	0.744991
YAR035W	YAT1	4	0.249214	0.329032	0.309599	-0.0915757	0.338779	0.719747	-0.5623	0.438378	0.312703
YAR037W	YAR037W	4	0.748632	0.993841	0.311809	0.379538	0.966859	0.604879	-0.408182	1.16073	0.763534
YAR040C	YAR040C	4	0.0991547	0.0947817	0.199151	-0.0787431	0.215299	0.629486	-0.263804	0.599534	0.705477
YAR042W	SWH1	8	0.531302	0.528491	0.0631983	0.204788	0.534253	0.437529	-0.407661	1.07797	0.604824
YAR043C	YAR043C	4	0.279071	0.844012	0.632703	0.325948	0.630026	0.499296	0.316496	0.756194	0.717266
YAR044W	YAR044W	4	-0.248233	0.0746411	0.0289231	-0.19964	0.204027	0.253696	0.0908594	0.509875	0.887179
YAR047C	YAR047C	4	-0.284235	0.285126	0.214344	-0.320685	0.421385	0.346867	-0.11474	0.45102	0.8322
YBL007C	SLA1	4	-2.22614	0.591628	0.0232334	-0.870187	0.548627	0.126419	2.14994	0.636379	0.0791093
YBL008W	HIR1	4	0.0821309	0.360284	0.742373	-0.314651	0.476941	0.402444	-0.760062	0.553796	0.28775
YBL009W	ALK2	4	-0.241538	0.353948	0.350722	-0.0727814	0.240881	0.690044	0.362142	0.634351	0.617566
YBL012C	YBL012C	4	0.696828	0.115368	0.0110292	0.54454	0.295356	0.09858	0.0534838	0.818179	0.961963
YBL013W	FMT1	4	2.52477	0.554007	0.0169426	2.74761	0.724929	0.0307989	1.68676	0.724444	0.137592
YBL015W	ACH1	4	-1.66694	0.442059	0.0231882	-1.3627	0.471006	0.049369	0.0444372	0.277916	0.900703
YBL016W	FUS3	4	-2.66184	0.835175	0.0310423	-2.26896	0.554819	0.0268601	-0.190569	0.537055	0.76054
YBL017C	PEP1	4	0.479184	0.89695	0.449957	0.667892	0.655691	0.241268	0.720342	0.614125	0.337742
YBL019W	APN2	4	-1.83258	0.286957	0.0100732	-2.17407	0.138755	0.00379867	-1.4698	0.208977	0.0180511
YBL024W	NCL1	4	-1.14576	0.498857	0.0540959	-0.793552	0.371056	0.0792054	0.378359	1.38743	0.81961
YBL029W	YBL029W	4	1.00564	0.473792	0.0616833	0.310256	0.380925	0.320856	-1.02507	0.347655	0.100248
YBL032W	HEK2	4	2.18159	1.03583	0.0624441	2.0217	0.76827	0.0570038	0.68264	0.624217	0.362387
YBL036C	YBL036C	4	-0.0960818	0.524152	0.792673	-0.224605	0.452857	0.517083	-0.238494	0.176807	0.294714
YBL037W	APL3	4	-0.906388	0.659037	0.129563	-0.79049	0.706816	0.213392	-0.0452371	0.719974	0.962912
YBL039C	URA7	4	-1.66023	0.300526	0.0125692	-1.03129	0.487065	0.080196	0.772524	1.42036	0.638176
YBL042C	FUI1	4	-0.773914	0.543247	0.122657	-1.74987	0.594148	0.0477489	-2.42609	0.640845	0.0634437
YBL043W	ECM13	4	0.813206	0.351873	0.0535859	0.697031	0.504022	0.156108	0.184781	0.767513	0.841103
YBL044W	YBL044W	4	0.5302	0.522591	0.208725	0.796543	0.462318	0.110576	0.915929	0.482409	0.188951
YBL045C	COR1	4	-10.6936	0.26574	0.000710279	6.03216	0.157246	0.00147171	32.7915	0.698016	0.000192547
YBL048W	RRT1	4	0.123175	0.224124	0.438829	0.292358	0.410887	0.372537	0.521808	1.00266	0.653557
YBL049W	MOH1	4	0.841322	0.440666	0.0744262	0.733169	0.656035	0.213537	0.214934	0.910051	0.843559
YBL051C	PIN4	4	-4.50641	0.332446	0.00277245	-2.78549	0.195613	0.00423515	1.97273	0.465413	0.05291
YBL052C	SAS3	4	-1.11629	0.390813	0.0371624	-2.54065	0.461457	0.0169799	-3.57656	0.989344	0.0695968
YBL053W	YBL053W	4	0.196491	0.224519	0.255448	-0.250743	0.392628	0.415787	-0.822974	0.479438	0.217366
YBL054W	TOD6	4	0.828414	0.421106	0.0704523	0.472001	0.419649	0.211751	-0.345138	0.499549	0.545418
YBL055C	YBL055C	4	-0.737544	0.456162	0.0993621	-0.622075	0.662067	0.268535	0.027284	0.710975	0.9801
YBL057C	PTH2	4	-1.31687	0.320899	0.0200784	-1.31451	0.26139	0.019419	-0.477434	0.78211	0.59175
YBL060W	YEL1	4	0.198843	0.304798	0.368941	-0.0149058	0.359274	0.955849	-0.300491	0.4723	0.577202
YBL061C	SKT5	4	-0.179311	0.567684	0.648444	0.0776006	0.50559	0.841688	0.586105	0.251764	0.137592
YBL062W	YBL062W	4	0.330158	0.486707	0.353182	0.584828	0.513654	0.208128	0.802805	0.396044	0.172184
YBL063W	KIP1	4	-0.693329	0.277413	0.0467236	-0.877629	0.346163	0.0604693	-0.622971	0.611617	0.387686
YBL064C	PRX1	4	0.0589965	0.267886	0.751339	-0.511861	0.385725	0.165705	-1.1589	0.931051	0.317694
YBL066C	SEF1	4	0.994025	0.165659	0.0111579	1.10616	0.146488	0.0104549	0.773371	0.175616	0.0490821
YBL067C	UBP13	4	-0.281208	0.280071	0.212227	-0.741492	0.365611	0.0861071	-1.06	0.412147	0.117458
YBL068W	PRS4	4	2.38328	0.770476	0.0326767	1.87325	1.04837	0.104518	-0.0115906	1.01079	0.994247
YBL070C	YBL070C	4	-0.378649	0.726058	0.458518	-0.450927	0.656019	0.385939	-0.235843	0.465993	0.662174
YBL071C	YBL071C	4	-0.156339	2.24219	0.919712	-0.0545496	1.96721	0.970756	0.249655	0.769182	0.782254
YBL078C	ATG8	4	0.444309	0.24225	0.0796756	0.8359	0.190128	0.0238315	1.15828	0.219481	0.0337883
YBL081W	YBL081W	4	0.969889	0.805592	0.161285	0.851132	0.984048	0.299061	0.247199	0.854668	0.807365
YBL082C	ALG3	4	1.45943	0.257228	0.0120113	0.7285	0.608337	0.194594	-0.906965	1.21092	0.511041
YBL083C	YBL083C	4	0.202374	0.295429	0.349239	0.025722	0.338883	0.922951	-0.216103	0.608699	0.76054
YBL085W	BOI1	4	-0.155394	0.237691	0.368201	-0.12057	0.494591	0.747236	0.100509	1.17452	0.948272
YBL087C	RPL23A	2	-1.20311	0.446781	0.239322	-0.804583	1.07274	0.597603	0.456851	1.59242	0.894616
YBL088C	TEL1	4	0.826166	0.265443	0.0324088	0.500738	0.49839	0.245427	-0.276918	1.17337	0.843559
YBL089W	AVT5	4	-0.516863	0.518578	0.214344	2.66672	0.530072	0.019419	6.97554	0.857025	0.0135637
YBL091C-A	SCS22	4	0.232457	0.472409	0.483644	0.341808	0.271265	0.179744	0.435739	0.688604	0.579612
YBL092W	RPL32	4	-0.915119	0.331369	0.0393648	-1.2046	0.565812	0.0797179	-0.954394	0.690926	0.286087
YBL094C	YBL094C	4	0.107794	0.147014	0.321999	-0.162295	0.194509	0.312468	-0.465942	0.488204	0.411873
YBL095W	YBL095W	4	0.183769	0.237439	0.301872	0.287816	0.231286	0.183047	0.402705	0.255042	0.241976
YBL096C	YBL096C	4	0.359977	0.334742	0.19102	0.401498	0.400064	0.245757	0.339742	0.673749	0.663966
YBL099W	ATP1	4	-10.5144	0.733819	0.00252383	4.19983	0.655266	0.0136974	28.3771	1.41328	0.00144491
YBL100C	YBL100C	4	-9.97821	0.189276	0.000604357	3.98497	0.514904	0.0102635	26.933	0.870236	0.000530048
YBL101C	ECM21	4	2.74189	0.69217	0.0213634	2.7125	0.686342	0.0285351	1.21791	0.474596	0.117674
YBL102W	SFT2	4	-0.63446	0.428689	0.115796	-0.818613	0.52194	0.129188	-0.597024	0.515434	0.341213
YBL104C	SEA4	4	1.86933	0.89105	0.0628322	1.28675	0.938354	0.157764	-0.397267	0.949381	0.717266
YBL106C	SRO77	4	0.409568	0.118342	0.0269343	0.50122	0.157174	0.04176	0.473285	0.34016	0.282979
YBL107C	MIX23	4	-0.00508074	0.362258	0.982642	-0.0405443	0.219179	0.808146	0.00894354	0.76232	0.994247
YBR001C	NTH2	4	0.788925	0.560028	0.12432	0.45079	0.740458	0.434391	-0.321501	0.768862	0.717266
YBR003W	COQ1	4	-8.09369	2.80493	0.0367706	5.50457	3.28494	0.115087	26.9381	12.2248	0.150472
YBR005W	RCR1	4	0.0756757	0.277007	0.694542	-0.0486248	0.172863	0.71045	-0.154319	0.219441	0.536467
YBR006W	UGA2	4	-0.516672	0.237319	0.058936	-0.500983	0.184856	0.0550521	-0.099446	0.139412	0.532602
YBR007C	DSF2	4	-0.784502	0.689128	0.174092	-0.810926	0.975523	0.313619	-0.31005	1.54571	0.868639
YBR010W	HHT1	4	1.09434	0.18963	0.0118252	0.557508	0.302095	0.0985452	-0.632349	0.447958	0.277682
YBR012C	YBR012C	4	0.477412	0.152618	0.0322141	0.406166	0.261768	0.131407	0.138996	0.553593	0.834899
YBR013C	YBR013C	4	0.673092	0.293307	0.0541474	0.418739	0.472486	0.291118	-0.184794	0.757736	0.838903
YBR014C	GRX7	4	-0.186281	0.531181	0.612662	-0.321806	0.490832	0.40475	-0.293385	0.937243	0.791217
YBR016W	YBR016W	4	0.312948	0.272961	0.172354	-0.0668062	0.371228	0.814098	-0.621586	0.885387	0.536499
YBR020W	GAL1	4	-0.197193	0.559364	0.61104	-0.718544	0.488109	0.142196	-1.15982	0.263762	0.0490821
YBR022W	POA1	4	0.511643	0.160961	0.0311602	0.401418	0.385348	0.235115	0.0668385	0.652362	0.937235
YBR023C	CHS3	4	-0.504087	0.360028	0.125454	-0.104314	0.499701	0.783439	0.763834	0.613841	0.317694
YBR024W	SCO2	4	-0.349695	0.465469	0.312699	-0.500563	0.680314	0.360257	-0.398764	1.0823	0.751631
YBR025C	OLA1	4	-3.53946	0.7119	0.0149037	-3.09891	0.949857	0.0400524	-0.466014	1.05867	0.705477
YBR027C	YBR027C	4	1.73221	0.476247	0.0246857	1.16281	0.652035	0.104757	-0.427506	0.730147	0.607134
YBR028C	YPK3	4	0.195209	0.451044	0.534444	0.00719193	0.462165	0.983415	-0.244604	0.292697	0.466205
YBR033W	EDS1	4	0.0142461	0.246032	0.933473	0.0141785	0.387359	0.960815	0.0964062	1.00398	0.940619
YBR034C	HMT1	4	-0.641653	0.413938	0.10647	-0.767727	0.509491	0.13684	-0.470444	0.526344	0.439609
YBR037C	SCO1	4	-10.5758	1.05371	0.00469212	6.75815	0.811539	0.00921046	34.2011	0.61339	0.000166535
YBR041W	FAT1	4	1.26668	0.611071	0.0641817	1.07564	0.359973	0.046565	0.214918	0.549243	0.735216
YBR044C	TCM62	4	-1.74606	0.438844	0.0211856	-0.530303	0.275447	0.0925488	2.04576	0.376489	0.0317074
YBR045C	GIP1	4	-1.22203	0.195537	0.0103563	-1.26813	0.295062	0.0247773	-0.544395	0.567019	0.40965
YBR046C	ZTA1	4	-0.345329	0.21149	0.0980393	-0.312845	0.490163	0.4159	0.0126285	0.845312	0.991481
YBR047W	FMP23	4	-0.018265	0.197072	0.893989	-0.333495	0.0817441	0.0269121	-0.621615	0.482752	0.311489
YBR048W	RPS11B	4	-2.30639	1.35859	0.0912713	-1.62039	1.49067	0.221908	0.618786	1.20847	0.65819
YBR050C	REG2	4	-0.082953	0.175688	0.500642	-0.343944	0.388927	0.291167	-0.52863	1.04313	0.662174
YBR051W	YBR051W	4	0.897475	1.01182	0.250711	1.05529	1.05381	0.246589	0.833383	0.999991	0.467596
YBR052C	RFS1	4	-1.08118	0.461972	0.0523847	-1.64307	0.0729313	0.00232642	-1.63507	0.9059	0.201573
YBR053C	YBR053C	4	0.272358	0.29978	0.243021	-0.197835	0.57539	0.651749	-0.841233	0.893291	0.417818
YBR056W	YBR056W	4	0.0721548	0.29938	0.728768	0.108337	0.661806	0.831018	0.202565	0.987759	0.866136
YBR058C	UBP14	4	-2.82501	0.328355	0.00624765	-2.19935	0.617874	0.0342074	0.258306	0.844532	0.795757
YBR059C	AKL1	4	1.51397	0.341124	0.0176299	0.907975	0.735429	0.185252	-0.60421	1.06164	0.61853
YBR062C	YBR062C	8	-0.685309	0.416472	0.0152301	-0.770138	0.375083	0.0106014	-0.397325	0.515607	0.275929
YBR063C	YBR063C	4	-0.0676032	0.740019	0.895087	-0.325776	0.438801	0.356402	-0.515656	0.774065	0.561263
YBR064W	YBR064W	4	1.20786	1.12417	0.191288	1.39607	1.1062	0.179298	1.03632	0.467792	0.149766
YBR068C	BAP2	4	0.682959	0.214653	0.0311354	0.310263	0.4609	0.394235	-0.444805	0.753418	0.605016
YBR069C	TAT1	4	0.13802	0.582013	0.732201	0.0395758	0.620215	0.934182	-0.0694409	0.787033	0.946304
YBR071W	YBR071W	4	0.635109	0.364719	0.0874358	0.281886	0.0900785	0.042906	-0.422138	0.522009	0.476642
YBR072W	HSP26	4	0.00874892	0.486078	0.977481	0.0768171	0.281596	0.718031	0.246186	0.86563	0.810717
YBR074W	PFF1	8	-0.0975678	0.617078	0.73223	-0.402744	0.634031	0.218478	-0.633673	0.688841	0.19815
YBR075W	YBR075W	4	-0.679393	0.270433	0.046395	-0.996333	0.223906	0.023436	-0.91314	0.673555	0.292727
YBR076W	ECM8	4	1.00318	0.510002	0.0704523	0.535903	0.311873	0.110609	-0.516679	0.548637	0.417818
YBR098W	MMS4	4	-0.632614	0.313186	0.0673354	-0.765904	0.235122	0.0401249	-0.482625	0.844141	0.617356
YBR105C	VID24	4	-0.0714063	0.242324	0.67061	-0.0357814	0.5394	0.931763	0.138847	1.10491	0.923522
YBR157C	ICS2	4	1.00652	0.438753	0.0541622	0.309997	0.549939	0.465167	-1.02722	0.989576	0.379385
YBR201W	DER1	4	-1.09819	0.375628	0.0360685	-1.6145	0.658908	0.0636857	-1.54066	0.957593	0.235
YBR230W-A	YBR230W-A	4	-0.750588	0.527176	0.122657	-0.978451	0.528576	0.0980818	-0.745179	0.436825	0.218929
YBR274W	CHK1	4	-0.0305638	0.224516	0.845962	-0.541837	0.535036	0.242993	-1.0648	1.07047	0.396203
YCL012C	YCL012C	3	-0.635562	0.45947	0.212839	-0.564323	0.483576	0.298031	-0.0271187	0.894234	0.987065
YCL014W	BUD3	2	0.569224	0.325397	0.32767	0.433319	0.656754	0.633518	0.0345424	0.881646	0.987065
YCL026C-B	HBN1	4	0.910157	0.622965	0.118172	0.63595	0.765218	0.313628	-0.125971	0.855792	0.908255
YCL061C	MRC1	4	0.156916	0.390694	0.563759	-0.37106	0.614965	0.437404	-1.02052	0.791468	0.31138
YCR061W	YCR061W	4	1.60912	0.653894	0.0481262	1.49312	0.560441	0.0562775	0.531541	0.555792	0.411402
YCR095W-A	YCR095W-A	4	-0.0218171	0.211548	0.883264	-0.435645	0.264658	0.11894	-0.843367	0.242048	0.075743
YDL026W	YDL026W	4	0.0374771	0.442846	0.902662	0.106746	0.614672	0.820298	0.261371	1.05243	0.835996
YDL069C	CBS1	4	-10.3883	0.419645	0.00126696	6.52243	0.537289	0.00514253	33.3376	0.595649	0.000166535
YDR090C	YDR090C	4	0.29241	0.518064	0.429213	-0.0823143	0.289842	0.70746	-0.619291	0.738424	0.465971
YDR092W	UBC13	4	-1.39406	0.101585	0.00273291	-1.15275	0.640588	0.103258	0.0226205	1.52333	0.991481
YDR147W	EKI1	4	0.855977	0.21612	0.0213634	0.690788	0.342452	0.0865684	0.0939292	0.39108	0.841469
YDR179W-A	YDR179W-A	4	0.340955	0.215972	0.102984	0.111642	0.31951	0.646237	-0.273407	1.02972	0.82381
YDR315C	IPK1	4	-4.31943	0.50798	0.00640318	-2.27878	0.234477	0.00750568	2.76819	0.740677	0.0652221
YDR318W	MCM21	4	1.2537	0.16559	0.00763379	0.868673	0.27164	0.0415845	-0.223965	0.810385	0.816386
YDR475C	JIP4	4	-0.355681	0.528959	0.356737	-0.867399	0.973584	0.289153	-1.20728	1.32733	0.433041
YDR485C	VPS72	4	0.887397	0.322097	0.0394991	0.573589	0.285729	0.0870025	-0.224319	0.634889	0.762157
YDR501W	PLM2	4	-1.20924	0.618845	0.0712708	-1.11105	0.893755	0.183376	-0.216575	1.21362	0.887179
YER007W	PAC2	4	0.139229	0.534536	0.707272	-0.0453756	0.441415	0.897012	-0.261343	1.17491	0.852034
YER076C	YER076C	4	0.987629	0.390791	0.0458777	1.02496	0.355681	0.0497408	0.60353	0.93215	0.571877
YER099C	PRS2	4	-0.541115	0.181347	0.0349277	-0.804702	0.424528	0.0946724	-0.733808	1.08943	0.556327
YER105C	NUP157	4	0.285882	0.330334	0.25964	-0.0579329	0.643145	0.909891	-0.553099	1.08578	0.660206
YER109C	FLO8	4	0.668837	0.449874	0.114787	0.550325	0.410599	0.163245	0.116739	0.632025	0.883017
YER155C	BEM2	4	0.665936	0.122726	0.0129075	1.61042	0.555827	0.0492263	2.48953	1.25104	0.175943
YFL010W-A	AUA1	4	-0.172207	0.715899	0.72897	-0.292261	0.522349	0.467277	-0.252707	0.198651	0.314288
YFL031W	HAC1	4	-0.82713	0.46154	0.082825	-1.16714	0.518929	0.0730799	-1.02896	0.608629	0.222129
YFL042C	YFL042C	4	-1.45136	0.294886	0.0150697	-2.04391	0.300006	0.0124493	-1.86463	1.16729	0.236816
YFR038W	IRC5	4	1.47162	0.920579	0.100895	1.10375	0.726134	0.135161	-0.0908082	0.166493	0.637083
YFR045W	YFR045W	4	0.371455	0.546637	0.352494	-0.0982637	0.508541	0.799139	-0.797049	0.286341	0.106018
YGL023C	PIB2	4	-2.77215	0.548194	0.0144403	-3.13811	0.9112	0.0363768	-1.93334	1.34449	0.272004
YGL033W	HOP2	4	0.146219	0.180432	0.283387	-0.234887	0.313023	0.351935	-0.697163	0.442307	0.242472
YGL045W	RIM8	4	-2.58083	0.229697	0.0038249	-1.66382	0.546084	0.0451004	1.01528	0.976182	0.379385
YGL101W	YGL101W	4	0.394798	0.183238	0.060117	-0.0570486	0.429055	0.863209	-0.746976	0.866958	0.454518
YGL104C	VPS73	4	-0.871578	0.197006	0.0176784	-0.922765	0.381925	0.0652541	-0.40325	0.536288	0.508998
YGL178W	MPT5	4	-0.486462	0.188159	0.043923	-1.00249	0.151341	0.0132112	-1.27381	0.178018	0.017466
YGL184C	STR3	4	0.221278	0.23594	0.232826	0.0669786	0.196887	0.654658	-0.157954	0.60366	0.826748
YGL185C	YGL185C	4	-0.482547	0.260642	0.0785026	-0.449058	0.259447	0.109866	-0.0448407	0.551345	0.950977
YGL186C	TPN1	3	-8.91969	0.0740656	0.00134767	-2.94459	0.289373	0.0242378	9.55335	0.562832	0.0241401
YGL191W	COX13	4	-0.446548	0.351157	0.148087	3.07489	0.582524	0.0177741	7.7607	1.63863	0.0429849
YGL192W	IME4	2	0.54973	0.120648	0.164234	0.0848603	0.101585	0.565613	-0.70864	0.443825	0.550914
YGL196W	DSD1	4	-0.291708	0.167293	0.0873305	-0.221076	0.208552	0.229108	0.121163	0.374718	0.783412
YGL202W	ARO8	4	-2.10752	0.383618	0.0126902	-1.78294	0.380951	0.0217618	-0.101877	0.351681	0.807323
YGL211W	NCS6	4	-4.6196	0.772831	0.0112059	-3.87498	0.672461	0.0159184	-0.256961	0.424612	0.595983
YGL224C	SDT1	4	0.67383	0.323098	0.0633853	0.492957	0.248416	0.0886671	-0.0203653	0.705464	0.984885
YGL237C	HAP2	4	-3.2186	0.194806	0.00211788	3.50212	0.372679	0.00753885	13.6995	0.658961	0.00134644
YGR037C	ACB1	4	-1.37368	0.307427	0.0174297	-0.525601	0.383007	0.157578	1.38664	0.648878	0.158357
YGR062C	COX18	4	-11.259	0.414205	0.00114838	5.28593	0.90429	0.0154693	32.1416	1.46741	0.00120156
YGR225W	AMA1	4	1.71917	1.13164	0.11043	1.68411	0.848284	0.0886671	0.7602	0.406468	0.19147
YGR244C	LSC2	4	0.427616	0.110717	0.0223795	0.415196	0.245094	0.113531	0.248706	0.348463	0.532545
YHL001W	RPL14B	4	0.271773	0.521427	0.458679	0.339506	0.435599	0.337097	0.3599	0.511309	0.536367
YHR001W	OSH7	4	0.559087	0.32184	0.0877576	0.46877	0.612009	0.34409	0.131948	0.842493	0.900703
YHR063C	PAN5	4	-0.355569	0.474018	0.313055	-0.442789	0.458925	0.258611	-0.259173	0.6998	0.750242
YHR071W	PCL5	4	-0.58755	0.272906	0.0602002	-0.473645	0.337649	0.153056	0.0890638	0.492908	0.886467
YHR141C	RPL42B	4	-2.36546	0.224217	0.00421491	-1.66782	0.280824	0.0151745	0.619059	0.405811	0.253731
YHR149C	SKG6	4	0.452543	0.341509	0.137944	0.151608	0.187567	0.323105	-0.384805	0.471149	0.473006
YHR187W	IKI1	2	-4.22619	1.13508	0.189786	-3.43977	0.367583	0.122634	0.00758606	1.22015	0.997303
YHR192W	LNP1	4	1.53166	0.882814	0.0878151	1.09945	0.691265	0.126093	-0.208386	0.446656	0.685536
YIL041W	GVP36	4	-0.701627	0.793133	0.25149	-1.40266	0.712047	0.089607	-1.78064	0.300781	0.026166
YJL012C	VTC4	4	1.52072	0.664684	0.0542478	1.47597	0.472805	0.043096	0.652194	0.503803	0.309175
YJL020C	BBC1	4	0.134461	0.3378	0.566698	0.162614	0.355485	0.548045	0.211748	0.421232	0.664678
YJL059W	YHC3	4	0.235953	0.427825	0.43762	0.478512	0.475032	0.245016	0.734761	0.696077	0.373655
YJL160C	YJL160C	4	0.162996	0.265651	0.392307	0.154442	0.281792	0.476023	0.142186	0.434452	0.780928
YJR060W	CBF1	4	-7.7607	0.297472	0.00114838	-6.94545	0.293794	0.00225509	-1.46615	0.992171	0.263868
YJR112W-A	YJR112W-A	4	2.46172	0.359868	0.00898532	2.30863	0.411617	0.0165699	0.819728	0.55091	0.263088
YJR143C	PMT4	4	2.32576	0.47277	0.0150697	2.10091	0.42879	0.0203759	0.600299	0.604499	0.396951
YJR151C	DAN4	4	-1.20664	0.0573531	0.00149675	-0.843571	0.284697	0.0472801	0.376133	0.652399	0.61474
YKL002W	DID4	4	-1.65487	0.38105	0.0182975	-0.10844	0.0267314	0.0271347	2.82395	0.651662	0.0505358
YKL033W-A	YKL033W-A	4	-0.415299	0.437195	0.228913	-0.58622	0.389991	0.137489	-0.472099	0.277955	0.220714
YKL065C	YET1	4	0.87602	0.257159	0.0278499	0.306246	0.282302	0.222342	-0.800935	0.231533	0.0766455
YKL157W	APE2	4	0.154127	0.243699	0.38092	0.198409	0.440636	0.5545	0.256329	1.03836	0.836728
YKL198C	PTK1	4	1.57792	0.905085	0.0873305	1.56477	0.680041	0.0704247	0.747655	0.464018	0.235
YKL201C	MNN4	4	0.62572	0.0864935	0.00808663	0.325608	0.375805	0.298893	-0.307606	0.993528	0.792086
YKR054C	DYN1	4	-1.88187	0.822599	0.0542478	-2.50979	1.17795	0.0796158	-2.13097	1.57506	0.292982
YKR091W	SRL3	4	0.106025	0.16229	0.368448	-0.310352	0.319459	0.256526	-0.793425	0.637804	0.317694
YKR099C-A	YKR099C-A	4	-0.688291	0.316808	0.0591259	-0.604371	0.136198	0.0234963	-0.0217445	0.303694	0.957824
YKR100C	SKG1	4	2.29875	0.535322	0.0186317	1.6218	0.780301	0.0823347	-0.421164	1.20506	0.764354
YLL006W-A	YLL006W-A	4	0.0525976	0.28212	0.789012	-0.343164	0.261116	0.168515	-0.770634	0.289152	0.111773
YLR054C	OSW2	4	0.145932	0.350845	0.550617	0.317682	0.331611	0.261254	0.537444	0.302094	0.206044
YLR118C	YLR118C	4	-0.228026	0.341228	0.359326	-0.276371	0.764242	0.633437	-0.116846	1.13169	0.937126
YLR125W	YLR125W	4	2.16906	0.733113	0.035458	2.00848	0.448384	0.0232903	0.675642	0.539612	0.316901
YLR194C	YLR194C	4	-0.153873	0.389917	0.569775	-0.312617	0.301108	0.235968	-0.331139	0.364525	0.433565
YLR211C	ATG38	4	0.181216	0.545117	0.630937	-0.0320246	0.737583	0.954598	-0.307027	0.795192	0.73818
YLR285C-A	YLR285C-A	4	1.48473	0.746586	0.0691347	1.58642	0.65742	0.0652541	0.963582	0.302178	0.0855847
YLR307C-A	YLR307C-A	4	1.48052	0.244465	0.0109741	2.27334	0.231739	0.00742931	2.50531	0.566919	0.0490821
YLR329W	REC102	4	0.432946	0.21814	0.0694172	0.199885	0.244989	0.320352	-0.241748	0.586644	0.721365
YLR332W	MID2	4	-0.0559979	0.269635	0.765249	-0.0405465	0.233517	0.820298	0.100498	0.0675308	0.263088
YLR406C-A	YLR406C-A	4	1.56875	0.699261	0.0563257	1.25323	0.601021	0.0819343	0.0683585	0.808956	0.948685
YLR419W	YLR419W	4	-0.465095	0.261608	0.0838591	-0.4103	0.514555	0.328435	0.0103369	0.770709	0.992985
YLR445W	GMC2	4	1.88608	0.812461	0.053189	1.40433	0.555713	0.0607038	-0.164808	0.750045	0.853874
YML007C-A	YML007C-A	4	-2.03637	0.15229	0.00283246	-1.68566	0.352776	0.0211075	-0.0125467	0.746382	0.990441
YML034W	SRC1	4	-0.330541	0.744475	0.523979	-0.483859	0.851568	0.461607	-0.3959	1.04106	0.742701
YML054C-A	YML054C-A	4	0.0973737	0.407523	0.730638	0.0854828	0.524192	0.831518	0.106175	0.761285	0.913876
YML058W-A	HUG1	4	0.368646	0.226977	0.0989442	0.231477	0.291809	0.330222	-0.0555669	0.697882	0.951909
YML104C	MDM1	4	0.525295	0.520992	0.210741	0.496345	0.413066	0.193485	0.254295	0.552509	0.688136
YMR001C-A	YMR001C-A	4	-0.680387	0.428547	0.10195	-0.850072	0.566661	0.137917	-0.584699	0.512492	0.345466
YMR032W	HOF1	1	-2.99346	NA	NA	-1.4138	NA	NA	2.31563	NA	NA
YMR194C-B	CMC4	4	0.802447	0.430091	0.0773837	0.62548	0.337524	0.0980818	0.0443299	0.271892	0.900344
YMR230W-A	YMR230W-A	4	-0.729626	1.01973	0.331094	-0.24321	1.03455	0.756886	0.859188	0.971572	0.444282
YMR247W-A	YMR247W-A	4	-0.31219	0.246675	0.149249	-0.468603	0.646903	0.365791	-0.394826	1.07261	0.751631
YMR272W-B	YMR272W-B	4	0.745282	0.246199	0.0339576	0.583505	0.187116	0.0430993	0.053378	0.540817	0.938613
YMR315W-A	YMR315W-A	4	0.415963	0.343253	0.15988	0.0813373	0.37858	0.778248	-0.475968	0.721257	0.564898
YNL042W-B	YNL042W-B	4	-0.393007	0.406619	0.223931	-0.715205	0.464284	0.132407	-0.800255	0.32121	0.122856
YNL090W	RHO2	4	0.544443	0.0559572	0.0049868	0.378347	0.242985	0.130678	-0.0436678	0.511288	0.948272
YNL146C-A	YNL146C-A	4	-0.855469	0.480644	0.0837073	-0.810821	0.853237	0.264274	-0.182205	1.10762	0.898743
YNL162W-A	YNL162W-A	4	-0.512726	0.437681	0.167111	-0.64704	0.568755	0.208222	-0.43274	0.954183	0.694415
YNL209W	SSB2	4	0.749991	0.310239	0.0497433	0.707581	0.430315	0.119105	0.322018	0.509399	0.580118
YNL277W-A	YNL277W-A	4	1.81908	0.268018	0.00908221	1.8384	0.49723	0.0320891	0.925128	0.767581	0.328943
YOL013W-B	YOL013W-B	4	0.19006	0.139719	0.131965	0.492607	0.210995	0.0686869	0.848766	0.253654	0.0809432
YOL019W-A	YOL019W-A	4	0.669152	0.20402	0.0295911	0.731318	0.155077	0.0215433	0.520396	0.35975	0.269412
YOL038C-A	YOL038C-A	4	-0.25051	0.582853	0.537344	-0.40263	0.684585	0.447194	-0.358398	0.814428	0.705477
YOL048C	RRT8	4	0.64698	0.364672	0.0842575	0.522517	0.442795	0.197642	0.0939361	0.449296	0.862008
YOL052C-A	DDR2	4	1.01757	0.553249	0.0793307	0.7678	0.684053	0.212472	-0.024647	0.622921	0.979011
YOL154W	ZPS1	4	-0.0503828	0.389884	0.854255	-0.472921	0.283822	0.115969	-0.875252	0.120729	0.0172585
YOL164W	BDS1	4	1.28783	0.456682	0.0380404	1.3538	0.631742	0.0789822	0.798114	0.649668	0.321094
YOL164W-A	YOL164W-A	4	0.740563	1.20411	0.391687	0.974949	1.05867	0.276382	0.936101	0.570802	0.230881
YOR020W-A	YOR020W-A	4	-0.840694	0.329343	0.0450941	-1.06482	0.338802	0.0427532	-0.776054	0.37502	0.166845
YOR034C-A	YOR034C-A	4	0.437864	0.079588	0.0126854	0.6742	0.235726	0.0504663	0.80873	0.434712	0.192783
YOR069W	VPS5	4	-2.09397	0.802035	0.0433648	-0.913456	0.740102	0.18529	1.81565	0.409661	0.0489654
YOR087W	YVC1	4	-0.854524	0.304314	0.0382787	-0.887286	0.547275	0.122129	-0.354678	0.818656	0.70913
YOR239W	ABP140	4	-0.412715	0.210759	0.0709935	-0.226487	0.478015	0.534685	0.32667	1.0384	0.790306
YPL038W-A	YPL038W-A	4	2.89829	0.5485	0.0133827	2.79935	0.83981	0.0389949	1.13066	0.893103	0.315635
YPL152W-A	YPL152W-A	4	2.52699	0.495255	0.0141837	2.21449	0.504011	0.0238315	0.49211	1.16057	0.715172
YPL189C-A	COA2	4	-9.92896	0.219653	0.000604357	6.99612	0.322667	0.00235073	33.5695	0.376865	0.000133698
YPL277C	YPL277C	4	-0.111692	0.478806	0.735697	-0.343313	0.49326	0.380974	-0.475544	0.491408	0.407569
YPR089W	YPR089W	4	0.388055	0.517236	0.313055	0.186414	0.463688	0.596621	-0.191109	0.282105	0.553906
YPR108W-A	YPR108W-A	4	-0.207388	0.383411	0.445354	-0.168103	0.504318	0.661587	0.0878453	1.36434	0.961963
YPR141C	KAR3	4	-0.966086	1.16233	0.274751	0.199735	0.883589	0.766914	2.27365	0.673373	0.0791093
YPR159C-A	YPR159C-A	4	0.132032	0.641372	0.767529	0.0461608	0.43814	0.894046	-0.0439672	0.769047	0.968976
YBR084W	MIS1	4	0.373569	0.468051	0.289565	1.06318	0.449888	0.0672289	2.08811	0.905344	0.139525
YBR092C	PHO3	4	-1.54403	0.405067	0.0227923	-1.86113	0.747624	0.062262	-1.3515	1.06352	0.314288
YBR093C	PHO5	4	-0.379119	0.400666	0.230343	-0.724578	0.421379	0.110576	-0.920217	0.632873	0.267785
YBR094W	PBY1	4	0.509452	0.197874	0.0443679	0.207812	0.374154	0.469918	-0.421644	0.786871	0.644512
YBR096W	YBR096W	4	1.5221	0.427235	0.025515	1.38022	0.520389	0.0563909	0.431129	0.455906	0.416187
YBR098W	MMS4	4	-0.444941	0.190321	0.0525018	-0.176131	0.641832	0.716007	0.643014	1.41121	0.693166
YBR099C	YBR099C	4	-0.00510447	0.24961	0.975723	-0.18618	0.458292	0.592291	-0.332189	0.664203	0.666809
YBR103W	SIF2	1	3.92209	NA	NA	2.64032	NA	NA	-1.48272	NA	NA
YBR108W	AIM3	4	0.994279	0.464444	0.0607377	1.09998	0.616731	0.104757	0.843987	0.646705	0.306903
YBR116C	YBR116C	4	0.0939178	0.722483	0.853332	0.277327	1.04416	0.724998	0.655209	1.15322	0.619269
YBR119W	MUD1	4	-1.69394	0.223905	0.00763379	-1.79195	0.256961	0.0119589	-0.848726	0.583548	0.267785
YBR120C	CBP6	4	-9.54536	0.202481	0.000604357	7.20445	0.286925	0.00212354	39.4069	0.546687	0.000133698
YBR128C	ATG14	4	-1.25039	0.551664	0.0551132	-0.893505	0.500435	0.104582	0.522234	0.118258	0.0490821
YBR129C	OPY1	4	1.9805	0.651813	0.0337535	1.7537	0.645855	0.0548658	0.409696	0.327431	0.316901
YBR130C	SHE3	4	-0.219376	0.117759	0.0776399	-0.201522	0.506553	0.60044	0.0904535	1.13383	0.951909
YBR132C	AGP2	4	-0.211576	0.414774	0.468921	-0.321079	0.298228	0.224216	-0.236186	0.871796	0.821019
YBR134W	YBR134W	4	0.359821	0.183115	0.0705988	-0.160557	0.335962	0.531068	-1.0533	0.820434	0.31244
YBR137W	YBR137W	4	0.53761	0.201467	0.0416384	0.508589	0.358416	0.150147	0.296993	0.844694	0.763534
YBR139W	YBR139W	4	-0.630312	0.650822	0.22323	-0.54002	0.678281	0.328535	0.100099	0.622546	0.900703
YBR140C	IRA1	1	-2.542	NA	NA	-1.89437	NA	NA	0.715968	NA	NA
YBR144C	YBR144C	4	0.869217	0.345402	0.0462616	0.58789	0.426655	0.15674	-0.213119	0.454828	0.684734
YBR145W	ADH5	4	0.699241	0.463221	0.1117	0.365709	0.521359	0.378164	-0.42205	0.903489	0.685427
YBR147W	RTC2	4	0.0669144	0.0912982	0.322	-0.169672	0.443534	0.61425	-0.444828	0.96802	0.688644
YBR148W	YSW1	4	0.469769	0.278974	0.0926676	0.582199	0.324963	0.104088	0.634139	0.691084	0.427997
YBR149W	ARA1	4	-0.181131	0.374049	0.489725	-0.140349	0.257001	0.477556	0.166437	0.53111	0.791217
YBR151W	APD1	4	1.38719	0.880718	0.103253	1.29176	1.00893	0.1753	0.493034	0.833301	0.60485
YBR157C	ICS2	4	1.2588	0.351356	0.0253149	0.749488	0.316728	0.0671688	-0.635088	0.572633	0.355994
YBR158W	AMN1	4	-0.858991	0.247245	0.0267589	-0.74287	0.312108	0.0668409	0.0679396	0.433976	0.900703
YBR161W	CSH1	4	1.15484	0.481298	0.0502762	0.787842	0.62306	0.178669	-0.311359	0.886971	0.764148
YBR162C	TOS1	4	0.622452	0.101148	0.0106735	0.74333	0.290378	0.0596445	0.722189	0.903813	0.481916
YBR162W-A	YSY6	4	1.02782	0.397158	0.043923	1.24403	0.448298	0.0532256	1.14486	0.56557	0.172252
YBR163W	EXO5	1	-21.0296	NA	NA	-9.06358	NA	NA	22.0345	NA	NA
YBR164C	ARL1	4	-1.17193	0.333928	0.0262323	-1.18381	0.429275	0.0538674	-0.399332	0.573191	0.540967
YBR165W	UBS1	4	-0.527459	0.171574	0.0331007	-0.867211	0.322603	0.0555526	-0.969708	0.783102	0.319831
YBR166C	TYR1	4	0.305372	0.257258	0.164234	-0.0488911	0.174527	0.710892	-0.646438	0.552377	0.33873
YBR171W	SEC66	4	-0.826275	0.148737	0.0124213	-1.48634	0.251202	0.0152278	-1.92921	0.718615	0.111025
YBR175W	SWD3	4	-0.0929593	0.30026	0.654334	0.719558	0.296504	0.0648321	2.20444	0.176051	0.0047535
YBR176W	ECM31	4	-0.693771	0.242781	0.0371467	-0.77904	0.550223	0.150597	-0.382329	1.26567	0.798235
YBR177C	EHT1	4	0.456962	1.02424	0.522643	0.812612	1.1952	0.389891	1.25885	1.05921	0.333022
YBR178W	YBR178W	4	-1.08872	0.285633	0.0227923	-1.26651	0.578882	0.076626	-0.793225	1.48346	0.645052
YBR180W	DTR1	4	-2.95247	0.334077	0.00588997	-3.64644	0.482648	0.0104549	-2.93835	0.905914	0.0837254
YBR182C	SMP1	4	0.618458	0.273611	0.0553786	0.809142	0.258551	0.042906	0.901347	0.231989	0.0607815
YBR184W	YBR184W	4	1.92214	1.31806	0.118395	1.54923	1.34491	0.205063	0.00580481	1.05701	0.996211
YBR185C	MBA1	4	-0.226963	0.137654	0.0961896	1.26984	0.134674	0.00751052	3.91957	0.495439	0.0143562
YBR186W	PCH2	4	0.588409	0.291476	0.0673354	0.236118	0.499582	0.535192	-0.518683	0.790302	0.567308
YBR187W	GDT1	4	2.7848	0.623815	0.0174297	3.85832	0.752023	0.0187235	4.12773	0.847238	0.0403964
YBR188C	NTC20	4	-0.869725	0.405377	0.0605359	-1.00035	0.302168	0.0394971	-0.576106	0.499242	0.342905
YBR195C	MSI1	4	-0.963821	0.445832	0.0598003	-1.3631	0.593847	0.0706829	-1.31305	0.692144	0.188951
YBR197C	YBR197C	4	0.529018	0.140859	0.0233268	0.441391	0.325726	0.160608	0.141403	1.02424	0.914595
YBR200W	BEM1	4	-0.619697	1.1012	0.430136	0.129068	0.628633	0.785982	1.811	0.765982	0.1337
YBR201W	DER1	4	-0.373989	0.410341	0.241876	-0.185532	0.496057	0.621862	0.465541	0.630135	0.515991
YBR203W	COS111	4	-0.891531	0.263893	0.0281861	-1.48596	0.684553	0.0773013	-1.7874	1.33721	0.297814
YBR205W	KTR3	4	1.45891	0.298782	0.015146	1.49035	0.394336	0.0308573	0.852869	0.662343	0.311489
YBR206W	YBR206W	4	0.191568	0.110153	0.0876	0.175089	0.375434	0.540319	0.179552	1.08465	0.898324
YBR207W	FTH1	4	0.44436	0.26744	0.0949867	0.0236399	0.311711	0.922951	-0.758422	0.885374	0.457765
YBR209W	YBR209W	4	0.420311	0.298791	0.124477	0.447479	0.386859	0.203691	0.39177	0.459809	0.460307
YBR210W	ERV15	4	-0.099799	0.185636	0.447952	-0.546066	0.172644	0.0424664	-1.06041	0.217969	0.040399
YBR212W	NGR1	4	0.837098	1.09599	0.306853	0.591358	0.992264	0.442267	-0.134819	0.539596	0.834899
YBR213W	MET8	4	0.32916	0.255093	0.14468	0.329087	0.204617	0.123963	0.281683	0.0948601	0.0987569
YBR214W	SDS24	4	0.806921	0.686084	0.166323	-0.106739	0.681629	0.838822	-1.87868	0.347419	0.0318748
YBR215W	HPC2	4	1.52715	0.630404	0.0495388	1.07514	1.01245	0.228719	-0.370339	1.27991	0.807365
YBR216C	YBP1	4	0.234632	0.327549	0.330633	0.275327	0.563801	0.523232	0.346366	0.991137	0.764354
YBR217W	ATG12	4	-1.53979	0.504853	0.0334995	-1.32108	0.772594	0.11161	0.0387756	1.0445	0.980316
YBR218C	PYC2	4	0.148345	0.235965	0.38261	-0.124491	0.269126	0.543818	-0.503474	0.470983	0.370296
YBR219C	YBR219C	4	1.26004	0.129857	0.00498744	1.04608	0.298064	0.0351717	0.130774	0.781648	0.897511
YBR220C	YBR220C	4	0.979259	0.18516	0.0133773	0.663581	0.351122	0.0951369	-0.254451	0.866326	0.803446
YBR222C	PCS60	4	0.349332	0.285775	0.1575	0.291635	0.297769	0.253637	0.141105	0.600198	0.84451
YBR223C	TDP1	4	1.15633	0.8171	0.123672	1.23589	0.722068	0.111408	0.846446	0.549611	0.250859
YBR225W	YBR225W	4	-2.19892	0.452096	0.0151758	-1.93556	0.593543	0.0400524	-0.131138	0.595322	0.853741
YBR226C	YBR226C	4	-0.674562	0.54554	0.154602	-0.919216	0.571718	0.12398	-0.78702	0.450278	0.211652
YBR227C	MCX1	4	2.86966	0.44133	0.00961728	2.27224	0.568662	0.0280262	-0.165412	1.10663	0.906439
YBR228W	SLX1	4	-0.829456	0.258899	0.0308068	-1.0564	0.137724	0.0103242	-0.808234	0.769907	0.374882
YBR230C	OM14	4	-0.906702	0.269689	0.0284391	-1.01766	0.434618	0.0683263	-0.541168	0.702183	0.497167
YBR231C	SWC5	4	-0.622102	0.271452	0.0542366	-0.257575	0.116168	0.0748596	0.814281	0.287624	0.10397
YBR233W	PBP2	4	0.16095	0.212318	0.309317	-0.0160604	0.190343	0.915544	-0.249701	0.845138	0.802077
YBR235W	VHC1	4	0.694214	0.182845	0.0229447	0.312972	0.194514	0.123951	-0.547857	0.670566	0.473006
YBR238C	YBR238C	4	0.488879	0.328854	0.114787	0.712734	0.511028	0.1543	0.931157	0.935364	0.396203
YBR239C	ERT1	4	1.59214	0.17077	0.00537193	1.68285	0.248651	0.0126523	1.06419	0.748494	0.275626
YBR240C	THI2	4	-0.435694	0.137531	0.0313776	-0.542285	0.150212	0.0336062	-0.325754	0.142084	0.140343
YBR241C	YBR241C	4	-0.33454	0.116813	0.0370632	-0.251776	0.34249	0.360306	0.208752	0.854974	0.838783
YBR242W	YBR242W	4	0.0153562	0.302062	0.942835	-0.102782	0.373734	0.715508	-0.160232	0.900366	0.887179
YBR244W	GPX2	4	0.509978	0.102876	0.0149839	0.122583	0.469624	0.729677	-0.643635	1.02308	0.580917
YBR245C	ISW1	4	1.15246	0.344486	0.0286377	0.680788	0.33854	0.0868619	-0.583625	0.191108	0.0933176
YBR246W	RRT2	4	-1.87473	0.383445	0.015146	-1.63647	0.457588	0.0338667	-0.0556995	0.822812	0.959513
YBR249C	ARO4	4	1.36416	0.323023	0.0191135	1.26394	0.373059	0.0375793	0.470652	1.10599	0.715172
YBR250W	SPO23	4	1.06986	0.895085	0.163169	0.639632	0.810056	0.33189	-0.512029	0.678419	0.507344
YBR255W	MTC4	4	-0.11453	0.271097	0.54364	-0.353508	0.419551	0.308381	-0.529646	0.594495	0.441354
YBR258C	SHG1	4	0.19508	0.30356	0.374422	-0.190129	0.479739	0.601767	-0.774417	0.682283	0.346721
YBR259W	YBR259W	4	-0.0845781	0.0877259	0.224671	-0.0570235	0.24572	0.75999	0.173999	0.592565	0.803446
YBR260C	RGD1	4	0.299797	0.705984	0.541628	0.605367	0.711372	0.30511	1.06097	0.538399	0.178916
YBR262C	MIC12	4	1.05725	0.61934	0.0905019	0.932393	0.529384	0.106845	0.273816	0.548339	0.667242
YBR263W	SHM1	4	-0.638465	0.703167	0.243116	-1.17342	0.938925	0.182258	-1.52364	1.16882	0.306903
YBR264C	YPT10	4	-0.613744	0.247489	0.0473566	-0.657587	0.350086	0.0961153	-0.240305	0.493172	0.672181
YCL001W	RER1	3	-0.0677577	0.731175	0.911849	-0.129432	0.797381	0.861897	-0.049931	0.512396	0.950977
YCL002C	YCL002C	4	0.543137	0.168853	0.0305297	0.380685	0.25285	0.137041	-0.0463736	0.362225	0.922337
YCL005W	LDB16	1	0.21697	NA	NA	0.625576	NA	NA	1.29208	NA	NA
YCL006C	YCL006C	3	-0.548095	0.433544	0.235591	-0.186758	0.465801	0.667717	0.838082	0.331832	0.235
YCL011C	GBP2	4	-4.25124	0.898377	0.0157803	-4.09892	0.612055	0.0129642	-1.30815	0.627003	0.164295
YCL014W	BUD3	3	0.020864	0.469501	0.959287	0.41819	0.630201	0.491708	1.17788	0.845826	0.391688
YCL023C	YCL023C	3	0.964386	0.336622	0.0845173	0.622605	0.248943	0.125057	-0.328534	0.414309	0.586064
YCL026C	YCL026C	4	0.227287	0.466131	0.486963	0.159703	0.457015	0.646237	0.0626004	0.879754	0.958184
YCL027W	FUS1	4	0.654336	0.383725	0.0906739	0.617787	0.447404	0.156246	0.328066	0.67618	0.673524
YCL028W	RNQ1	4	0.848346	0.633244	0.135366	0.472714	0.501861	0.267692	-0.466536	0.269229	0.214125
YCL029C	BIK1	4	-0.934684	0.354878	0.0427785	-0.757434	0.550726	0.157017	0.193548	0.675162	0.808695
YCL033C	MXR2	4	0.545061	0.1495	0.0246245	0.238368	0.347661	0.386813	-0.419309	1.0423	0.727015
YCL034W	LSB5	4	-0.673926	0.959528	0.338752	-0.481197	0.860616	0.467362	0.346645	0.666778	0.653934
YCL039W	GID7	4	0.593727	0.292165	0.0665923	0.871223	0.258126	0.0379381	1.11559	0.380222	0.101393
YCL040W	GLK1	4	0.307489	0.132256	0.0530432	0.346786	0.145399	0.0666342	0.374313	0.275715	0.292566
YCL042W	YCL042W	4	0.703393	0.226148	0.0324088	0.387946	0.302361	0.174728	-0.373386	0.48264	0.495977
YCL044C	MGR1	4	-0.0955219	0.337578	0.683724	0.463298	0.534767	0.298893	1.54592	0.799547	0.182739
YCL046W	YCL046W	4	0.943925	0.578303	0.0980805	0.751175	0.876828	0.302315	0.0487812	1.13172	0.977121
YCL047C	POF1	4	1.08583	1.04492	0.20123	1.24396	0.923615	0.162062	1.0195	0.725652	0.279661
YCL050C	APA1	4	0.690762	0.193035	0.0253415	0.455095	0.292861	0.131006	-0.172127	0.746886	0.846989
YCL051W	LRE1	4	-0.408494	0.185899	0.0579984	-0.47594	0.426678	0.213813	-0.212532	1.10342	0.876327
YCL055W	KAR4	4	1.16414	0.169999	0.00898532	0.834199	0.230035	0.0332326	-0.211294	0.885441	0.842227
YCL056C	PEX34	4	-0.0682615	0.0769341	0.250655	-0.360071	0.412219	0.295851	-0.6465	0.975106	0.562573
YCL057W	PRD1	4	1.0959	0.164191	0.00931166	1.24672	0.0939697	0.00472225	1.00493	0.524358	0.185587
YCL063W	VAC17	4	-2.92307	0.642628	0.0169757	-2.47348	1.10111	0.0731951	0.0376797	1.64007	0.987065
YCL064C	CHA1	4	0.621074	0.65965	0.231676	0.176843	0.313415	0.464849	-0.742776	0.691464	0.369582
YCL069W	VBA3	4	-0.0743909	0.504983	0.834115	0.0511449	0.22924	0.770131	0.432311	1.10864	0.736127
YCR001W	YCR001W	4	-1.03097	0.595256	0.087952	-1.18268	0.539231	0.0762223	-0.700613	0.259163	0.110264
YCR005C	CIT2	4	-0.790799	0.625728	0.149531	-0.178166	0.86369	0.785392	1.3841	0.932451	0.263173
YCR007C	YCR007C	2	0.0758967	0.0121482	0.130964	-0.161148	0.374497	0.741396	-0.442123	0.99665	0.831101
YCR008W	SAT4	4	0.558043	0.982073	0.426271	0.54254	0.900784	0.437991	0.340877	0.618534	0.63549
YCR010C	ADY2	1	-2.19941	NA	NA	-2.51817	NA	NA	-1.63978	NA	NA
YCR015C	YCR015C	3	0.324778	0.00859937	0.00421491	0.0793874	0.291301	0.768181	-0.355907	0.771528	0.747198
YCR017C	CWH43	4	0.693043	0.0838077	0.00656446	-0.0681256	0.259587	0.728469	-1.53287	0.632696	0.127813
YCR019W	MAK32	1	-1.28093	NA	NA	-1.57544	NA	NA	-1.17895	NA	NA
YCR020C	PET18	1	-1.43536	NA	NA	-1.31186	NA	NA	-0.162703	NA	NA
YCR021C	HSP30	4	-3.13731	0.352847	0.00580519	-2.97935	0.587423	0.0190661	-0.810851	1.02889	0.487063
YDL002C	NHP10	4	-5.61469	0.345064	0.00217131	-4.83994	0.536081	0.00814095	-0.286036	0.682609	0.717266
YDL005C	MED2	1	-2.42083	NA	NA	-3.88604	NA	NA	-4.7065	NA	NA
YDL006W	PTC1	4	-5.12168	1.92131	0.0416936	-4.87631	1.93982	0.061257	-1.4442	0.882295	0.231242
YDL009C	YDL009C	4	-0.699373	0.0817948	0.00632027	-0.773406	0.393744	0.0898889	-0.355643	1.12322	0.788187
YDL010W	GRX6	4	0.16463	0.164943	0.213991	0.0172485	0.529559	0.965189	-0.171329	1.02553	0.897511
YDL011C	YDL011C	4	0.546565	0.223221	0.0486167	0.263805	0.410012	0.412562	-0.356639	0.614314	0.611672
YDL012C	YDL012C	4	-0.148553	0.271624	0.44049	-0.445876	0.102437	0.024227	-0.695576	0.34726	0.174441
YDL019C	OSH2	4	0.197325	0.158708	0.153166	0.136885	0.398411	0.651893	0.0681302	1.04796	0.961963
YDL020C	RPN4	4	-4.33096	0.7049	0.0107005	-3.03126	0.840043	0.0336062	1.63053	0.821926	0.177118
YDL022W	GPD1	4	-0.566526	0.355096	0.101278	-0.500416	0.506563	0.25059	0.065075	0.630489	0.937126
YDL023C	YDL023C	4	0.819596	0.247944	0.0291959	0.674896	0.238644	0.0515007	0.119421	0.441814	0.821464
YDL024C	DIA3	4	0.411483	0.532967	0.302708	0.246749	0.71365	0.64976	-0.109332	0.981985	0.931396
YDL026W	YDL026W	4	-0.941846	0.567919	0.0952392	-1.03996	0.476831	0.0768688	-0.523119	0.657221	0.483142
YDL027C	YDL027C	4	-0.507006	0.354799	0.122244	-0.434208	0.250611	0.109716	0.108198	0.147206	0.517478
YDL032W	YDL032W	4	-8.84183	0.551021	0.0021913	6.47264	0.440005	0.00403546	35.9924	0.554547	0.000133698
YDL033C	SLM3	4	-8.76215	0.137637	0.000604357	5.57263	0.19732	0.00212354	33.4882	0.48894	0.000133698
YDL034W	YDL034W	4	-1.71726	1.13598	0.111417	-0.765851	1.24291	0.429569	1.86054	1.22503	0.255964
YDL035C	GPR1	4	-3.07915	0.469931	0.00953429	-3.38682	0.46751	0.0111878	-1.99223	0.21509	0.00979362
YDL036C	PUS9	4	0.185397	0.193166	0.225706	0.00795296	0.30491	0.972036	-0.240231	0.629841	0.742142
YDL038C	YDL038C	4	0.00957073	0.844687	0.985867	0.0809102	0.684469	0.880467	0.328254	0.365811	0.437564
YDL039C	PRM7	4	0.0134306	0.244329	0.937384	-0.0270859	0.469928	0.940457	0.0400742	0.804175	0.972347
YDL046W	NPC2	4	-0.866695	0.311721	0.038846	-0.893182	0.561413	0.126082	-0.304937	0.933589	0.780993
YDL048C	STP4	4	0.692039	0.491732	0.1244	0.52565	0.464188	0.209636	0.00794558	0.46322	0.990268
YDL049C	KNH1	4	1.35962	0.256125	0.0132961	1.52171	0.276987	0.0169956	1.14841	1.02762	0.351808
YDL050C	YDL050C	4	-0.11972	0.261218	0.512078	-0.337979	0.506345	0.397657	-0.478206	0.912012	0.6503
YDL051W	LHP1	4	1.64282	0.752271	0.0585726	1.04309	0.625133	0.115787	-0.702999	0.288412	0.127402
YDL052C	SLC1	4	-0.0666071	0.0863971	0.303214	0.158004	0.350083	0.553482	0.692418	0.898296	0.497167
YDL053C	PBP4	4	0.824465	0.362029	0.0545206	0.727481	0.34552	0.0810695	0.245177	0.812962	0.798501
YDL054C	MCH1	4	-0.111199	0.332811	0.628963	-0.351953	0.326518	0.224072	-0.532803	0.321218	0.226622
YDL056W	MBP1	4	-0.249344	0.489351	0.469205	-0.505866	0.357174	0.150569	-0.633523	0.700851	0.435669
YDL057W	YDL057W	4	0.759333	0.402284	0.0758468	0.284029	0.324408	0.295101	-0.763384	0.106412	0.017466
YDL059C	RAD59	4	-0.082503	0.349779	0.732661	-0.620004	0.508076	0.189053	-1.28933	1.13242	0.34611
YDL062W	YDL062W	4	-1.40433	0.461278	0.0336118	-1.05152	0.428304	0.0636127	0.444965	0.215179	0.166905
YDL063C	SYO1	4	0.687969	0.0911668	0.00763877	0.87129	0.171363	0.0190184	0.912386	0.312229	0.101393
YDL065C	PEX19	4	-0.0242593	0.243298	0.886605	-0.171857	0.462059	0.623483	-0.253738	0.925944	0.818664
YDL066W	IDP1	4	-0.433265	0.439108	0.217746	-0.239927	0.390658	0.43105	0.452503	0.382432	0.333777
YDL067C	COX9	4	-9.32835	0.612711	0.0023466	7.60552	0.670572	0.00578225	39.9779	0.435353	0.000133698
YDL068W	YDL068W	4	-9.57865	0.527667	0.00193093	7.41441	0.192539	0.00147171	40.0228	0.658661	0.000148413
YDL069C	CBS1	4	-0.594056	0.406935	0.118218	-0.528958	0.38294	0.156222	0.0505256	0.467351	0.933563
YDL071C	YDL071C	4	-0.0583436	0.64985	0.896547	0.0253368	0.939182	0.971174	0.330805	1.06548	0.791987
YDL072C	YET3	4	0.198331	0.372951	0.451129	0.262065	0.512446	0.504052	0.390339	1.06206	0.751778
YDL074C	BRE1	4	-2.84287	0.120847	0.00131492	-2.43701	0.199206	0.00514253	-0.040885	0.338061	0.925769
YDL076C	RXT3	4	-0.118703	0.31771	0.591049	-0.169333	0.423956	0.598979	-0.0433874	0.436879	0.938336
YDL079C	MRK1	4	0.163922	0.209229	0.296907	0.134263	0.256554	0.494251	0.133418	0.236604	0.623019
YDL080C	THI3	4	-1.60414	0.0605247	0.00114838	-1.27862	0.265371	0.0208324	0.287682	0.76958	0.748184
YDL082W	RPL13A	4	0.0715074	1.02335	0.919712	0.230181	1.00453	0.763232	0.581401	0.656288	0.443418
YDL085W	NDE2	4	2.08017	0.130049	0.0021913	2.00789	0.310871	0.0135511	0.8533	0.634226	0.29551
YDL086W	YDL086W	4	1.72149	0.327569	0.0135021	1.87228	0.136619	0.00450701	1.27591	0.390109	0.0828112
YDL088C	ASM4	4	-1.29331	0.237386	0.0128764	-1.67156	0.217631	0.0103242	-1.40131	0.618255	0.143037
YDL089W	NUR1	4	0.726137	0.138014	0.013482	0.585554	0.332404	0.106845	0.0895936	0.942674	0.941672
YDL091C	UBX3	4	-0.0997208	0.290854	0.620295	-0.361179	0.355148	0.24158	-0.581482	0.674213	0.4545
YDL093W	PMT5	4	0.0134225	0.264777	0.942835	-0.167915	0.370925	0.552201	-0.324838	0.745118	0.707313
YDL094C	YDL094C	4	-0.574643	0.281517	0.0659829	-0.786882	0.750212	0.232663	-0.659728	1.34515	0.671641
YDL096C	OPI6	4	2.58076	0.76197	0.028098	2.21091	0.502525	0.0238315	0.29912	0.566717	0.647707
YDL099W	BUG1	4	-2.07595	0.756979	0.0398492	-2.77722	0.34174	0.00959322	-2.57748	0.939895	0.108482
YDL100C	GET3	4	-1.43684	1.38796	0.202192	-1.67793	1.31717	0.176839	-1.10808	0.843229	0.304135
YDL101C	DUN1	4	1.75929	0.302539	0.0116463	1.78299	0.399596	0.0233807	0.962991	0.797297	0.328447
YDL104C	QRI7	4	1.34976	1.64566	0.279029	6.3944	1.152	0.0168668	13.7963	1.38557	0.00828606
YDL107W	MSS2	4	-9.84059	0.16448	0.000604357	7.26563	0.209925	0.00175319	40.2026	0.599567	0.000133698
YDL109C	YDL109C	4	-0.59922	0.270824	0.0575681	-0.601303	0.205584	0.0482783	-0.125799	0.545257	0.846989
YDL110C	TMA17	4	1.11466	1.10881	0.211881	0.885846	0.609037	0.14449	0.0293027	1.35048	0.987546
YDL113C	ATG20	4	0.538216	0.597937	0.245952	0.300543	0.787598	0.614918	-0.243423	1.07085	0.84777
YDL114W	YDL114W	4	-0.653025	0.116221	0.0121727	-0.824749	0.215751	0.0304639	-0.588704	0.624232	0.417224
YDL117W	CYK3	4	-1.27944	0.281794	0.0170055	-0.923893	0.372062	0.0622726	0.506178	1.09049	0.686512
YDL118W	YDL118W	4	-2.33399	0.689579	0.0281222	2.00398	0.648236	0.0437077	10.3689	0.638513	0.00244009
YDL119C	YDL119C	4	-2.65923	0.258877	0.00444568	2.99539	0.191688	0.00379867	13.6398	0.48057	0.000651879
YDL121C	YDL121C	4	-0.500776	0.213059	0.0520599	-0.537331	0.165202	0.040245	-0.172471	0.542356	0.787958
YDL123W	SNA4	4	-0.256067	0.181646	0.124242	-0.469314	0.224841	0.0819202	-0.524296	0.43708	0.330705
YDL124W	YDL124W	4	-0.409203	0.61163	0.358843	-0.843182	0.67879	0.183532	-1.16263	0.929903	0.317014
YDL125C	HNT1	4	-2.23469	0.337861	0.00944894	-2.6811	0.466198	0.0159263	-1.98582	0.697692	0.103427
YDL127W	PCL2	4	-0.072649	0.369033	0.777162	-0.0495274	0.453765	0.890564	0.16768	0.590988	0.81085
YDL128W	VCX1	4	0.633871	0.509965	0.153166	0.187	0.762734	0.745844	-0.744071	0.986118	0.507344
YDL129W	YDL129W	4	0.0333113	0.192642	0.80349	-0.256394	0.193744	0.166402	-0.597034	0.351674	0.220714
YDL130W	RPP1B	3	-1.25056	0.089754	0.0130283	-0.473656	0.105648	0.0636127	1.61055	0.432164	0.157721
YDL131W	LYS21	4	-0.847307	0.14137	0.011172	-0.974245	0.356845	0.0544554	-0.556835	1.2146	0.689361
YDL133W	SRF1	4	-0.180187	0.648431	0.689293	0.00123752	0.573164	0.997534	0.531293	0.431856	0.320625
YDL134C	PPH21	4	-0.411426	0.227963	0.0818712	-0.550913	0.332476	0.117367	-0.400483	1.05116	0.742142
YDL134C-A	YDL134C-A	4	0.320691	0.639395	0.475685	0.16345	0.946462	0.821265	-0.129256	1.30908	0.938613
YDL135C	RDI1	4	-0.266972	0.3281	0.282121	-0.818361	0.714863	0.206711	-1.40525	1.20625	0.339723
YDL137W	ARF2	4	-0.271617	0.441186	0.391289	-0.0985089	0.363648	0.719521	0.470126	0.421075	0.35216
YDL138W	RGT2	4	-0.332778	0.253647	0.140674	-0.815295	0.394765	0.0831544	-1.2553	1.14722	0.362387
YDL146W	LDB17	4	1.2995	0.702788	0.0786694	1.30397	0.678257	0.0925608	0.713896	0.544324	0.305201
YDL149W	ATG9	4	-0.90784	0.459453	0.0699862	-0.775528	0.549974	0.151695	0.0887309	0.642857	0.914595
YDL154W	MSH5	4	1.09402	0.548605	0.0687555	0.561655	0.460635	0.189155	-0.766228	0.408173	0.190849
YDL155W	CLB3	4	-0.265883	0.120274	0.0576052	-0.0995903	0.538951	0.808227	0.45495	1.26073	0.755903
YDL156W	CMR1	4	0.129079	0.57158	0.744989	0.0154849	0.564919	0.970875	-0.0991802	0.401613	0.836728
YDL157C	YDL157C	4	-0.951842	0.432577	0.0579838	-0.0663449	0.660763	0.899075	2.02139	0.846636	0.131353
YDL160C	DHH1	1	-11.7361	NA	NA	-11.6626	NA	NA	-4.75567	NA	NA
YDL161W	ENT1	4	0.863617	0.440394	0.0708933	0.912807	0.488381	0.0971223	0.640923	0.459085	0.282022
YDL162C	YDL162C	4	-0.29672	0.378612	0.296855	-0.421306	0.388442	0.222342	-0.312167	0.381322	0.471952
YDL167C	NRP1	4	-0.844755	0.542116	0.105428	-0.874537	0.677696	0.173629	-0.30397	0.79595	0.742142
YDL168W	SFA1	4	1.02884	0.840567	0.157312	1.11358	0.851478	0.169603	0.804651	0.73798	0.363799
YDL169C	UGX2	4	0.529097	0.58263	0.243116	0.414731	0.658258	0.421124	0.0721508	0.497997	0.909328
YDL170W	UGA3	4	0.86624	0.41816	0.0642523	0.421588	0.688661	0.432142	-0.637635	0.96856	0.565702
YDL171C	GLT1	4	1.24853	0.480084	0.0435523	1.10506	0.48034	0.0704247	0.308472	0.479282	0.572756
YDL172C	YDL172C	4	-1.40589	0.402635	0.0264783	-1.01642	0.428598	0.0668899	0.539289	0.650937	0.468832
YDL174C	DLD1	4	-0.648578	0.240692	0.0409716	-0.801439	0.242288	0.0395214	-0.537897	0.837329	0.57322
YDL175C	AIR2	4	-0.215593	0.18728	0.171437	-0.305232	0.345039	0.291167	-0.186456	0.874413	0.858555
YDL176W	YDL176W	4	0.171188	0.127806	0.135366	0.0151431	0.0970847	0.839311	-0.190936	0.326392	0.607531
YDL177C	YDL177C	4	1.52744	0.36267	0.0192255	0.954602	0.322249	0.0472801	-0.683302	0.120126	0.0286146
YDL178W	DLD2	4	0.00874424	0.328439	0.969732	-0.447115	0.393331	0.208349	-1.03823	0.665331	0.246241
YDL179W	PCL9	4	-0.122256	0.30539	0.564814	-0.239658	0.1527	0.129096	-0.217953	0.622764	0.764354
YDL180W	YDL180W	4	0.829358	0.436932	0.0752167	0.840077	0.591727	0.150133	0.526387	0.736404	0.532059
YDL182W	LYS20	4	-3.46611	0.318188	0.00402521	-3.30173	0.31142	0.00629113	-0.936683	0.494954	0.189344
YDL183C	YDL183C	4	1.26531	0.245012	0.0139461	0.951991	0.320955	0.0472752	-0.124394	1.10781	0.931396
YDL184C	RPL41A	4	-0.829197	0.250352	0.0290889	-0.68078	0.171791	0.0285193	0.164541	0.247333	0.561505
YDL186W	YDL186W	4	-0.739579	0.245471	0.0343507	-1.12829	0.406009	0.053189	-1.18848	0.570317	0.164555
YDL187C	YDL187C	4	0.750888	0.113825	0.00945642	0.549674	0.206689	0.0562775	-0.056794	0.463939	0.925146
YDL188C	PPH22	4	0.362793	0.321214	0.176315	-0.0807144	0.330831	0.747153	-0.852815	0.979035	0.449303
YDL189W	RBS1	4	0.961852	0.267035	0.0251381	0.892758	0.0727462	0.00514253	0.37698	0.625575	0.597895
YDL190C	UFD2	4	0.650996	0.170935	0.0228205	0.115459	0.412517	0.711008	-0.96641	0.885423	0.363299
YDL192W	ARF1	4	-4.67496	0.379135	0.00328582	-4.24369	0.360415	0.00534514	-0.768887	0.882343	0.449303
YDL197C	ASF2	4	-0.155047	0.580605	0.70143	0.191851	0.365661	0.493474	0.97098	0.394002	0.124934
YDL199C	YDL199C	4	0.16978	0.877702	0.781185	0.465059	1.13939	0.590463	0.977969	1.1814	0.468925
YDL203C	ACK1	4	0.440413	0.271878	0.0992439	0.552356	0.233554	0.0671888	0.620157	1.1602	0.645052
YDL204W	RTN2	4	0.708958	0.32269	0.0579984	0.420316	0.179409	0.0682856	-0.301515	0.359427	0.465971
YDL206W	YDL206W	4	0.567427	0.341258	0.0949096	0.347043	0.9275	0.621843	-0.185963	1.70559	0.933036
YDL210W	UGA4	4	-0.293437	0.556024	0.454087	-0.408797	0.58962	0.382464	-0.286836	0.755878	0.743681
YDL211C	YDL211C	4	1.5227	0.267611	0.0120113	1.52085	0.370544	0.0268482	0.794236	0.776621	0.385904
YDL215C	GDH2	4	0.167016	0.304832	0.439827	0.269673	0.0860858	0.0428853	0.47763	0.560873	0.460307
YDL216C	RRI1	4	0.536441	0.228459	0.0521289	0.295772	0.184432	0.124463	-0.251956	0.596923	0.716736
YDL218W	YDL218W	4	0.154575	0.518523	0.6666	0.18301	0.843698	0.776273	0.279908	1.51009	0.883017
YDL219W	DTD1	4	-0.0539781	0.245493	0.751451	0.112898	0.379506	0.694033	0.548283	0.675339	0.475111
YDL222C	FMP45	4	-1.21193	0.736904	0.096698	-1.23537	0.7695	0.124258	-0.446638	0.508187	0.446762
YDL229W	SSB1	2	-3.20148	6.56422	0.687954	-3.68212	7.15604	0.69807	-2.49346	4.37791	0.786715
YDL230W	PTP1	2	-1.68016	0.516136	0.209517	-1.8599	0.207458	0.126093	-1.05455	0.576232	0.514816
YDL231C	BRE4	2	-1.11313	0.0539609	0.0579984	-1.36329	0.475843	0.264979	-0.991329	1.3495	0.733797
YDL233W	MFG1	4	-0.890927	0.459957	0.0723382	-0.693274	0.638263	0.222076	0.265378	0.73793	0.756541
YDL234C	GYP7	4	0.366902	0.459052	0.28899	0.122923	0.643421	0.801528	-0.333996	0.762426	0.706555
YDL236W	PHO13	4	-2.93231	0.593936	0.0150657	-2.70412	0.353008	0.0103242	-0.540041	0.497359	0.365768
YDL240W	LRG1	4	-0.402361	0.0766043	0.0135021	-0.342926	0.0543773	0.0137497	0.118911	0.157517	0.507344
YDL241W	YDL241W	4	0.374049	0.381617	0.219758	0.124307	0.66177	0.804979	-0.345832	1.28149	0.821464
YDL242W	YDL242W	4	-0.17414	0.266753	0.368714	-0.46301	0.453672	0.240865	-0.68476	0.638346	0.369824
YDR001C	NTH1	4	-0.171198	0.38409	0.522819	-0.485983	0.280341	0.109706	-0.750639	0.773802	0.407159
YDR003W	RCR2	4	-0.0694564	0.851867	0.906377	0.0686397	0.676564	0.898134	0.466997	0.706846	0.56453
YDR005C	MAF1	4	-0.737793	1.3821	0.449975	-0.279212	1.54766	0.813855	1.00787	1.06357	0.415073
YDR010C	YDR010C	4	-0.0867202	0.241672	0.605409	-0.158372	0.317063	0.514179	-0.0840021	0.462975	0.886467
YDR011W	SNQ2	4	-0.190567	0.331039	0.420851	-0.252701	0.254662	0.24941	-0.104338	0.195383	0.645389
YDR014W	RAD61	4	-0.241162	0.20211	0.163248	-0.25114	0.547856	0.547271	0.00889348	1.0408	0.995737
YDR018C	YDR018C	4	0.263192	0.637287	0.553394	0.371798	0.30175	0.185889	0.534718	0.636962	0.465971
YDR022C	ATG31	4	-0.268843	0.190327	0.123936	-0.125604	0.185564	0.392107	0.393928	0.290381	0.292566
YDR026C	NSI1	4	-0.256878	0.376856	0.351186	-0.308434	0.350552	0.29277	-0.105661	0.257682	0.721657
YDR029W	YDR029W	4	-0.852476	1.00504	0.266979	-1.4054	0.696275	0.0865684	-1.66292	0.483761	0.0773551
YDR036C	EHD3	4	0.526183	0.352424	0.113822	0.519458	0.41939	0.184218	0.349816	0.68693	0.660206
YDR042C	YDR042C	4	0.710804	0.422768	0.0929321	0.58757	0.630562	0.271226	0.127907	0.799548	0.900703
YDR043C	NRG1	4	0.0209231	0.255709	0.906168	0.395024	0.447046	0.29135	1.11772	0.861464	0.308283
YDR008C	YDR008C	4	-0.347071	0.445139	0.298839	-0.675433	0.765921	0.292163	-0.511181	0.870045	0.606665
YDR049W	VMS1	4	-1.47425	0.593996	0.0473206	-1.24586	0.732192	0.112422	0.312925	1.19612	0.826748
YDR051C	DET1	4	-1.22314	0.434356	0.0380404	-1.29634	0.659135	0.0896616	-0.193647	0.736878	0.826258
YDR055W	PST1	4	-0.0322983	0.130682	0.721686	0.399427	0.738906	0.481819	0.924198	1.33758	0.545418
YDR056C	YDR056C	4	-0.191257	0.262943	0.324791	-0.1386	0.469787	0.696084	0.20802	0.435165	0.678398
YDR057W	YOS9	4	0.563178	0.976091	0.419933	0.23935	0.997923	0.75133	-0.350565	0.683146	0.657371
YDR059C	UBC5	4	-0.618943	0.602234	0.204468	-0.544596	0.760969	0.370238	0.175884	0.628861	0.813951
YDR061W	YDR061W	4	0.214554	0.330561	0.370776	0.027084	0.159031	0.823962	-0.16087	0.373828	0.71107
YDR063W	AIM7	4	-0.0440968	0.207964	0.76061	-0.476429	0.420441	0.209439	-0.6496	1.03202	0.580917
YDR066C	RTR2	4	-1.49667	0.555387	0.0409716	-1.96937	0.717201	0.0542768	-0.966178	0.411582	0.135833
YDR067C	OCA6	4	1.46406	0.559625	0.0432208	1.31109	0.271664	0.0208324	0.111049	0.45431	0.838783
YDR068W	DOS2	4	0.213786	0.183874	0.168982	0.124145	0.35948	0.650116	0.0169644	0.434265	0.979534
YDR072C	IPT1	4	0.548758	0.283239	0.0723382	0.0984987	0.13258	0.356149	-0.582972	0.372434	0.244674
YDR073W	SNF11	4	-1.50421	0.258618	0.0116463	-2.03224	0.167218	0.00514253	-1.06811	0.483307	0.149793
YDR076W	RAD55	4	-1.96417	0.543174	0.0249653	-2.4459	0.987686	0.0624546	-1.06087	1.47751	0.529394
YDR078C	SHU2	4	1.18933	0.956878	0.153166	1.06397	1.02046	0.2348	0.115279	0.432914	0.82381
YDR079W	PET100	4	-11.934	0.544782	0.00143791	9.64077	0.733428	0.00475154	37.3937	0.953687	0.000288
YDR084C	TVP23	4	-1.35888	0.383738	0.0258374	-0.902459	0.206033	0.0239597	0.747053	0.709753	0.374467
YDR085C	AFR1	4	-0.940704	0.227905	0.0198677	-1.16721	0.729986	0.125069	-0.425263	1.17897	0.755903
YDR089W	YDR089W	4	0.640338	0.324683	0.0701702	0.46721	0.338255	0.156222	-0.0635083	0.461334	0.91468
YDR092W	UBC13	4	-0.146788	0.261751	0.43151	-0.226417	0.216213	0.233271	-0.0251809	0.0659116	0.742142
YDR093W	DNF2	4	-0.266684	0.173336	0.108009	-0.491546	0.60519	0.321684	-0.309448	0.871949	0.76054
YDR094W	YDR094W	4	0.455445	0.234246	0.071794	0.300138	0.670844	0.556553	-0.0620391	0.912286	0.959513
YDR096W	GIS1	4	2.10039	0.945128	0.0572913	1.766	0.387476	0.0228303	-0.112468	0.935839	0.926005
YDR097C	MSH6	4	0.0768108	0.144146	0.450624	0.322879	0.651029	0.517083	0.604729	1.00147	0.597122
YDR098C	GRX3	4	-0.269236	0.298577	0.245415	-0.242779	0.77027	0.679976	0.147305	1.20122	0.925056
YDR099W	BMH2	4	0.000275745	0.167883	0.998058	0.17423	0.553776	0.680025	0.460734	0.843365	0.636968
YDR100W	TVP15	4	3.26373	0.431973	0.00763379	2.74803	0.461908	0.0151398	-0.247561	0.241618	0.385235
YDR102C	YDR102C	4	-0.534619	0.0817682	0.00955044	0.283847	0.197001	0.146688	1.54364	0.356688	0.0505442
YDR104C	SPO71	4	-0.300315	0.480528	0.38532	-0.459829	0.653985	0.37716	-0.196201	0.526347	0.748765
YDR105C	TMS1	4	0.354233	0.281448	0.150517	0.399171	0.182688	0.0767257	0.285288	0.346069	0.469121
YDR107C	TMN2	4	-0.369091	0.241423	0.109107	-0.318962	0.269149	0.196794	0.173651	0.178495	0.406843
YDR108W	TRS85	4	0.0355959	0.751763	0.946494	0.182256	0.774655	0.756822	0.416995	0.547201	0.502716
YDR110W	FOB1	4	0.710976	0.257528	0.0393659	0.306348	0.527826	0.452978	-0.472808	0.710011	0.561288
YDR111C	ALT2	4	0.42185	0.267983	0.103348	0.389749	0.486593	0.326749	0.156465	0.467395	0.775788
YDR112W	IRC2	4	0.0559328	0.546804	0.88386	-0.108121	0.428633	0.738553	-0.144825	0.667517	0.85582
YDR116C	MRPL1	4	1.07439	0.844134	0.147875	8.32963	0.707241	0.00534514	13.5222	0.283152	0.000191516
YDR117C	TMA64	4	-0.149327	0.594482	0.717984	-0.17511	0.548721	0.676536	0.072345	0.862394	0.948725
YDR119W	VBA4	4	0.0195303	0.192908	0.884765	-0.470701	0.249247	0.095252	-0.744275	0.5277	0.277732
YDR120C	TRM1	4	0.728287	0.544482	0.13562	0.515796	0.622178	0.314468	-0.12039	0.54773	0.853874
YDR121W	DPB4	4	-0.421797	0.381567	0.182688	0.19168	0.643469	0.694033	1.18963	0.60355	0.178916
YDR124W	YDR124W	4	-0.592005	0.439381	0.134185	-0.595904	0.64789	0.276799	0.0380548	0.460658	0.949926
YDR126W	SWF1	4	-7.77103	0.545945	0.00252689	-7.21933	0.334151	0.00235073	-0.152981	0.404108	0.744073
YDR127W	ARO1	4	-0.869181	0.414016	0.0628066	-0.52551	0.382174	0.157017	0.623927	0.779499	0.481241
YDR130C	FIN1	4	0.932411	0.432484	0.0600885	0.846736	0.481846	0.107252	0.144472	0.738884	0.874218
YDR131C	YDR131C	4	0.758285	0.434189	0.0870375	0.383858	0.218085	0.106882	-0.409951	0.446637	0.427997
YDR132C	YDR132C	4	-0.0708431	0.190121	0.592102	-0.48323	0.216593	0.0740557	-0.617795	0.585263	0.373655
YDR133C	YDR133C	4	0.540527	0.46224	0.167458	0.817059	0.434072	0.0957281	0.737769	0.293826	0.120934
YDR134C	YDR134C	4	-0.815622	0.47694	0.0902562	-0.669783	0.429532	0.130477	0.273012	1.41111	0.875595
YDR135C	YCF1	4	0.810231	0.350041	0.0534679	0.76494	0.506051	0.136339	0.197483	0.789823	0.834899
YDR139C	RUB1	4	0.118815	0.227488	0.458027	-0.259637	0.517126	0.512016	-0.524316	0.765092	0.549352
YDR142C	PEX7	4	-0.0524822	0.134879	0.575517	-0.0586924	0.333295	0.818481	0.124162	0.491424	0.833245
YDR143C	SAN1	4	0.788604	0.496082	0.101832	0.372112	0.566439	0.403967	-0.481396	0.524946	0.428009
YDR144C	MKC7	4	-0.214521	0.168893	0.148244	-0.692075	0.302922	0.0710809	-0.760392	0.810848	0.42001
YDR147W	EKI1	4	0.0515566	0.673211	0.912188	-0.0295494	0.341915	0.913817	0.0053334	1.35283	0.997303
YDR148C	KGD2	4	-2.01775	0.488361	0.0198362	0.143532	0.609658	0.756798	3.73811	0.648902	0.0276956
YDR149C	YDR149C	4	-3.60009	0.468044	0.00747845	-2.78921	0.487158	0.0160502	1.0167	0.854653	0.333022
YDR150W	NUM1	4	-2.00584	0.676406	0.0352961	-0.863962	0.493391	0.107816	1.88569	0.732071	0.11738
YDR152W	GIR2	4	-0.227979	0.642447	0.608975	-0.358558	0.878159	0.590462	-0.131457	0.568883	0.846937
YDR153C	ENT5	4	0.768552	1.21747	0.38149	0.704165	1.54032	0.548212	0.155768	0.908956	0.894616
YDR154C	YDR154C	4	0.25587	0.0691928	0.0240637	0.149814	0.403362	0.623925	-0.00585218	0.657431	0.995737
YDR155C	CPR1	4	-0.300207	0.279673	0.191357	0.00833729	0.517605	0.983077	0.65527	0.515592	0.314288
YDR156W	RPA14	4	0.55926	0.349353	0.100682	0.0849071	0.314034	0.719747	-0.625043	0.427198	0.26577
YDR157W	YDR157W	4	0.231693	0.425117	0.441877	-0.0701733	0.687576	0.897675	-0.366103	1.06581	0.769405
YDR162C	NBP2	4	0.0316354	0.938345	0.963029	-0.209526	1.04211	0.790347	-0.28916	0.365503	0.48568
YDR163W	CWC15	4	0.106948	0.580004	0.791521	-0.0404088	0.408505	0.900391	-0.105912	0.590746	0.887179
YDR165W	TRM82	4	-0.455075	0.574943	0.293064	-0.433478	0.461991	0.268535	0.107357	0.448827	0.841963
YDR169C	STB3	4	-0.511359	0.281167	0.0807567	-0.221547	0.383456	0.454777	0.585849	0.504013	0.339723
YDR171W	HSP42	4	0.864655	0.725641	0.163669	0.369784	0.838898	0.56183	-0.611247	1.01576	0.598415
YDR178W	SDH4	4	-3.05235	0.881905	0.0269343	-1.84566	0.594169	0.0433105	1.8284	0.401505	0.0464934
YDR179C	CSN9	4	-0.212903	0.60325	0.610713	-0.687323	0.387268	0.105628	-0.754422	0.805697	0.420502
YDR179W-A	YDR179W-A	4	-0.265972	0.255563	0.200771	-0.564889	0.396318	0.149136	-0.444042	0.566263	0.489434
YDR181C	SAS4	4	1.06045	0.22839	0.0164067	0.893628	0.369908	0.0652541	0.0182834	0.582458	0.98455
YDR183W	PLP1	4	0.364944	1.07051	0.62241	-0.21061	1.37422	0.841688	-0.841666	0.829291	0.389307
YDR184C	ATC1	4	-3.00671	0.974721	0.0329038	-4.20601	1.59264	0.0567517	-2.54072	1.51266	0.223389
YDR185C	UPS3	4	1.38468	0.862869	0.100474	0.504419	0.864548	0.450493	-1.22527	0.482165	0.11837
YDR186C	YDR186C	4	-1.21827	0.432304	0.0380404	-0.745176	0.34308	0.0772389	0.800924	0.678854	0.33504
YDR191W	HST4	4	-2.71005	0.31028	0.00607874	-2.75995	0.306155	0.00814095	-0.400178	0.458172	0.449162
YDR192C	NUP42	4	0.25355	0.274728	0.237732	-0.115296	0.773292	0.84614	-0.484287	1.04237	0.686512
YDR193W	YDR193W	4	0.0938901	0.331531	0.683584	-0.0906352	0.803457	0.886162	-0.175712	1.20981	0.90925
YDR194C	MSS116	4	-13.6102	0.29247	0.000604357	7.67681	0.61929	0.00514253	36.5896	1.37544	0.000735047
YDR197W	CBS2	4	-10.7936	1.70307	0.0101394	10.5182	1.90873	0.0169799	37.1062	0.73442	0.000188128
YDR198C	RKM2	4	0.0493468	0.21927	0.745891	0.0282995	0.35776	0.920422	0.114218	0.922132	0.92408
YDR199W	YDR199W	4	1.34721	0.284466	0.0157803	1.02867	0.302502	0.0372879	-0.209701	0.378583	0.633074
YDR200C	VPS64	4	1.15081	0.2411	0.0156682	0.595624	0.417276	0.14905	-0.673069	0.590008	0.345466
YDR204W	COQ4	4	-10.811	0.339309	0.000946052	10.3275	0.369541	0.00212354	36.788	0.397734	0.000133698
YDR206W	EBS1	4	2.19132	0.380083	0.0118252	2.57138	0.629559	0.0268686	1.20242	0.80107	0.260629
YDR209C	YDR209C	4	3.73147	0.556051	0.00923139	2.54326	0.326108	0.0101588	-1.39262	0.48117	0.101708
YDR210W	YDR210W	4	0.102138	0.595667	0.805394	-0.190845	0.775617	0.744981	-0.371628	0.888209	0.717266
YDR213W	UPC2	4	-0.611322	0.593447	0.203612	-0.764592	0.840113	0.280038	-0.236904	0.822663	0.808002
YDR214W	AHA1	4	0.562173	0.387001	0.119163	0.195522	0.420503	0.541574	-0.428633	0.312389	0.28775
YDR216W	ADR1	4	-0.274261	0.619409	0.525016	-0.430063	0.437581	0.252371	-0.185087	0.228445	0.475488
YDR217C	RAD9	4	0.450839	0.307874	0.117776	0.304393	0.370093	0.317376	-0.0466903	0.375072	0.923896
YDR218C	SPR28	4	-0.683232	0.660053	0.202192	-1.11894	1.08343	0.237418	-0.762729	1.07134	0.532971
YDR219C	MFB1	4	0.145565	0.606112	0.729315	0.0954183	0.398936	0.75201	0.0773879	0.711933	0.93312
YDR221W	GTB1	4	0.621694	0.667114	0.234804	0.235938	0.50671	0.540992	-0.453422	0.352918	0.312203
YDR222W	YDR222W	4	0.346144	0.339425	0.207009	-0.299156	0.706395	0.576515	-0.97169	1.00916	0.409074
YDR228C	PCF11	4	1.68675	0.651801	0.043923	1.03086	0.540003	0.0936284	-0.766552	0.553286	0.284771
YDR229W	IVY1	4	1.00248	0.0909851	0.00395525	0.555529	0.578295	0.260295	-0.500995	0.912472	0.63609
YDR231C	COX20	4	-9.49306	0.26942	0.000867734	9.73452	0.222879	0.00147171	33.5324	0.686219	0.000188128
YDR233C	RTN1	4	-1.20787	0.319505	0.0230715	-2.68793	0.507818	0.0177741	-2.75035	0.94224	0.101393
YDR239C	YDR239C	4	-0.0656439	0.534242	0.862165	0.246792	0.461746	0.486076	0.701614	0.290009	0.128084
YDR242W	AMD2	4	0.0716747	0.564679	0.856585	0.226688	0.596154	0.615238	0.438231	0.791727	0.633337
YDR244W	PEX5	4	1.63468	0.642724	0.0453341	1.14821	0.549562	0.0818029	-0.467072	1.11557	0.717266
YDR247W	VHS1	4	-1.03653	0.361374	0.0370632	-1.03454	1.06765	0.257152	-0.0256374	1.53354	0.990441
YDR248C	YDR248C	4	0.321423	0.859947	0.591049	0.00170552	1.04249	0.998068	-0.383555	0.611453	0.581267
YDR249C	YDR249C	4	0.936436	0.758264	0.154959	0.608856	0.86467	0.376488	-0.294908	0.595868	0.670111
YDR252W	BTT1	4	-0.0706276	0.229132	0.655548	-0.798449	0.420724	0.0946426	-1.19157	0.716064	0.22616
YDR254W	CHL4	4	-0.186733	1.03849	0.795523	-0.512785	1.17264	0.564674	-0.48014	0.613065	0.490166
YDR255C	RMD5	4	0.200539	0.150478	0.136524	0.614671	0.311157	0.0891413	0.93117	0.485788	0.185587
YDR257C	RKM4	4	-0.245218	0.483676	0.4712	-0.580401	0.276119	0.0812335	-0.506541	1.08871	0.686375
YDR259C	YAP6	4	0.376999	0.286066	0.139491	0.0351048	0.504251	0.928322	-0.414595	0.57255	0.525607
YDR261C	EXG2	4	-1.24245	1.48396	0.271903	-2.08579	1.55935	0.163819	-1.59787	0.561079	0.103427
YDR265W	PEX10	4	1.54609	0.970598	0.101579	1.63349	0.580177	0.0518547	0.562038	0.606162	0.423722
YDR270W	CCC2	4	-0.315841	0.150153	0.0625641	-0.604558	0.46148	0.1693	-0.433836	0.882939	0.670893
YDR272W	GLO2	4	-0.179538	0.893127	0.772195	-0.583749	0.748844	0.337097	-0.621117	0.978442	0.577949
YDR275W	BSC2	4	2.16202	0.452378	0.0156578	1.65807	0.306899	0.0172089	-0.410589	0.488149	0.465332
YDR276C	PMP3	4	-0.984841	0.409022	0.0500445	0.101643	0.316677	0.6748	1.95583	0.874804	0.147159
YDR277C	MTH1	4	-0.428944	0.185467	0.0535154	-0.251849	0.752131	0.659935	0.394599	1.22646	0.785427
YDR278C	YDR278C	4	-0.229389	0.361772	0.379877	-0.142455	0.512786	0.712781	0.26399	0.400643	0.565278
YDR279W	RNH202	4	0.457799	0.244056	0.076655	0.410718	0.199982	0.0841295	0.135231	0.344508	0.734618
YDR281C	PHM6	4	-1.38976	0.308276	0.0171775	-1.31866	0.233782	0.0164162	0.0409473	0.374211	0.93296
YDR282C	YDR282C	4	-0.183836	0.160575	0.172638	-0.146919	0.340283	0.56971	0.180628	0.606688	0.80103
YDR283C	GCN2	4	-1.13413	0.135818	0.00656446	-0.664487	0.68525	0.256899	0.808734	1.11195	0.523183
YDR284C	DPP1	4	-0.86952	0.153297	0.0120113	-1.21292	0.955419	0.177577	-0.625997	1.61629	0.737617
YDR287W	INM2	4	0.0707326	0.713521	0.887246	-0.0536313	1.25139	0.954598	-0.0701478	1.10698	0.962325
YDR291W	HRQ1	4	0.500536	0.233479	0.0605475	0.038394	0.441783	0.913315	-0.61266	1.03282	0.604824
YDR293C	SSD1	1	1.99706	NA	NA	-0.448403	NA	NA	-3.97004	NA	NA
YDR294C	DPL1	4	-1.5752	0.348615	0.0171121	-1.74942	0.27732	0.0137497	-0.436362	0.545275	0.481241
YDR295C	HDA2	4	2.08069	0.346646	0.0111579	1.9346	0.0965021	0.00252866	0.226778	0.397524	0.617814
YDR304C	CPR5	4	-0.1858	0.295429	0.382526	-0.358899	0.908032	0.602538	-0.201745	1.40047	0.909908
YDR306C	YDR306C	4	-0.551165	0.502076	0.184816	-0.306623	0.481845	0.416795	0.496835	0.315733	0.242635
YDR307W	PMT7	4	-0.170483	0.429806	0.568026	-0.603773	0.736219	0.318803	-0.672499	0.850117	0.48568
YDR312W	SSF2	4	0.907927	0.906614	0.212899	0.468933	1.03309	0.551119	-0.502357	0.834618	0.598415
YDR313C	PIB1	4	-0.272838	0.209278	0.142135	-0.425586	0.423549	0.245427	-0.179294	0.792376	0.848192
YDR314C	RAD34	4	-0.300046	0.229945	0.141988	-0.841814	0.628077	0.163245	-0.891522	0.814967	0.362387
YDR316W	OMS1	4	0.728944	0.126696	0.0118501	4.22381	0.357966	0.00534514	6.62385	0.721691	0.00992913
YDR317W	HIM1	4	0.0911079	0.162624	0.431763	-0.331294	0.457444	0.365791	-0.608904	0.574581	0.373172
YDR318W	MCM21	4	1.0959	0.258212	0.019011	0.795575	0.0412233	0.00264793	-0.218638	0.361077	0.595808
YDR319C	YFT2	4	0.441978	0.702264	0.382399	0.510792	0.705372	0.365791	0.343409	0.162265	0.16046
YDR329C	PEX3	4	-0.949478	0.226397	0.0193628	-1.00843	0.829729	0.189682	-0.121925	1.63351	0.955775
YDR332W	IRC3	4	-2.49226	0.289566	0.00624765	2.74567	0.331834	0.009345	9.25547	0.905615	0.00787626
YDR336W	YDR336W	4	0.780943	0.574983	0.132315	1.26802	0.798364	0.126131	1.16103	0.600571	0.182739
YDR338C	YDR338C	4	-0.746149	0.292846	0.0452239	-1.01058	0.438389	0.070253	-0.461689	0.557896	0.468925
YDR344C	YDR344C	4	0.182793	0.278724	0.367058	-0.0456813	0.332227	0.859601	-0.240779	0.161147	0.262003
YDR345C	HXT3	4	-1.70599	0.328073	0.0137623	-2.04965	0.543305	0.0309244	-0.766494	1.13063	0.553736
YDR346C	SVF1	4	0.357816	0.675489	0.452323	0.617212	0.622747	0.249675	0.676012	0.216971	0.0897607
YDR348C	PAL1	4	0.480625	0.455656	0.196768	0.910714	0.487337	0.0971223	1.00708	0.147216	0.0192802
YDR349C	YPS7	4	-0.0934443	0.2984	0.651447	0.222807	0.262844	0.30668	0.703901	0.785444	0.438306
YDR350C	ATP22	3	-14.4413	0.0785081	0.00106646	4.4062	1.22811	0.0818029	32.0127	2.18363	0.0301053
YDR351W	SBE2	4	1.31536	0.412193	0.0310118	0.723737	0.719814	0.245427	-0.711802	0.667389	0.371207
YDR352W	YPQ2	4	-0.769265	0.475701	0.0993621	-1.04534	0.526891	0.0886671	-0.486741	0.232489	0.1633
YDR354W	TRP4	4	-0.439793	0.262329	0.0934499	-0.446043	0.438462	0.24158	0.0592572	0.58561	0.937952
YDR358W	GGA1	4	0.427106	0.573057	0.315737	0.505236	0.908071	0.469343	0.357866	0.867982	0.721365
YDR360W	OPI7	4	1.61111	0.0766115	0.00149675	1.76528	0.486715	0.0332326	0.694379	0.943953	0.517371
YDR363W	ESC2	4	-1.08255	0.326835	0.0290889	-0.585275	0.295612	0.0888868	0.867634	0.935937	0.423722
YDR368W	YPR1	4	-1.39831	0.249053	0.0121769	-1.54839	0.699841	0.0752301	-0.362836	0.87887	0.721177
YDR369C	XRS2	2	-3.96449	0.662749	0.135266	-3.90742	0.431246	0.12535	-0.415571	0.310191	0.59175
YDR370C	DXO1	4	0.862618	0.309075	0.0386838	0.551293	0.635178	0.298491	-0.277694	1.59126	0.890874
YDR371W	CTS2	4	-0.757939	0.243518	0.0324088	-0.561605	0.771329	0.363684	0.374525	1.14273	0.780928
YDR372C	VPS74	4	1.33976	0.51452	0.0434963	0.727995	0.618087	0.198086	-0.744358	0.306363	0.127673
YDR374C	PHO92	4	0.556994	0.305609	0.0805352	0.658986	0.361524	0.101006	0.423018	0.714324	0.60485
YDR375C	BCS1	4	-13.4924	0.496525	0.00114838	8.55138	0.87277	0.00742931	37.9859	0.772553	0.000188128
YDR379W	RGA2	4	-0.439535	0.319701	0.129614	-0.666233	0.308609	0.0782499	-0.341722	0.473065	0.526574
YDR384C	ATO3	4	-0.0153083	0.58521	0.969732	0.0386439	0.623097	0.935725	0.239828	0.188694	0.314288
YDR385W	EFT2	4	-5.62832	0.276781	0.00158747	-5.93396	0.48752	0.00514253	-1.3539	1.09918	0.32035
YDR386W	MUS81	4	-0.581264	0.373204	0.105503	-0.781207	0.733135	0.228141	-0.316775	0.811254	0.735768
YDR387C	YDR387C	4	0.220671	0.303407	0.324791	0.153498	0.508084	0.690044	0.0589879	0.920389	0.962015
YDR389W	SAC7	4	-0.595969	0.248334	0.0502762	-1.05661	0.334582	0.0425481	-0.793481	0.6331	0.316901
YDR391C	YDR391C	4	-0.0208863	0.189395	0.875251	0.0551506	0.771782	0.926351	0.279069	1.26357	0.853569
YDR392W	SPT3	4	7.3684	0.475505	0.00227457	9.90432	0.403421	0.00212354	5.99082	0.587265	0.00787626
YDR393W	SHE9	4	-5.22456	0.110512	0.000604357	0.998802	0.363274	0.0541934	10.5907	0.621965	0.00215599
YDR395W	SXM1	4	2.58834	0.165647	0.00226821	3.2369	0.110517	0.00212354	1.75732	0.426107	0.0547504
YDR400W	URH1	4	0.266334	0.48647	0.440084	0.459862	0.700051	0.403967	0.540878	0.685144	0.485968
YDR401W	YDR401W	4	-0.0195246	0.452787	0.952494	0.136958	0.590322	0.75999	0.425637	1.00286	0.715172
YDR402C	DIT2	4	0.635953	0.355539	0.0831385	0.18008	0.387607	0.541839	-0.578587	0.143903	0.0571881
YDR403W	DIT1	4	0.922073	0.516346	0.0833978	0.79711	0.523345	0.13474	0.0712726	0.960964	0.956022
YDR406W	PDR15	4	0.0349874	0.244678	0.838376	0.103479	0.447712	0.760771	0.274695	0.523348	0.649827
YDR409W	SIZ1	4	-1.20279	0.483061	0.0471031	-0.785348	0.792171	0.249645	0.702287	1.07384	0.568251
YDR411C	DFM1	4	1.43205	0.556426	0.0443809	0.961814	0.628734	0.13364	-0.471452	0.763861	0.587865
YDR414C	ERD1	4	2.42376	0.470129	0.0139461	1.82235	0.298999	0.0146209	-0.544065	0.434097	0.316901
YDR415C	YDR415C	4	0.263825	0.234499	0.177548	0.320345	0.240572	0.165003	0.291224	0.207899	0.281314
YDR419W	RAD30	4	-0.384377	0.241934	0.101877	-0.551606	0.273476	0.0865684	-0.224307	0.758781	0.802077
YDR420W	HKR1	4	0.386693	0.448115	0.260518	0.181852	0.596767	0.688866	-0.163654	0.919854	0.887179
YDR421W	ARO80	4	-0.28421	0.582115	0.486601	-0.258152	0.862025	0.692644	0.144072	0.631833	0.84777
YDR422C	SIP1	4	-0.410273	0.392741	0.199369	-0.542209	0.366473	0.141022	-0.16444	0.871357	0.88025
YDR423C	CAD1	4	-1.36201	0.434971	0.0321529	-1.03392	0.631053	0.119806	0.51309	1.64352	0.791217
YDR425W	SNX41	4	-0.512479	0.353953	0.119649	-0.589839	0.316258	0.0971792	-0.0822697	0.627956	0.919854
YDR426C	YDR426C	4	-1.41653	0.339165	0.0194962	-1.25484	0.746298	0.114657	0.20125	0.909768	0.853272
YDR428C	BNA7	4	0.00757403	0.356261	0.974991	-0.311722	0.365227	0.303789	-0.435325	0.631305	0.54631
YDR430C	CYM1	4	-0.591444	0.371399	0.101589	-0.0158528	0.427411	0.960552	1.09231	0.373864	0.101393
YDR431W	YDR431W	4	-1.44109	0.336303	0.0186893	-0.9167	0.642534	0.149063	0.856947	1.04353	0.470537
YDR435C	PPM1	4	2.36194	0.54904	0.0186317	1.12227	0.575996	0.0911875	-1.71549	0.704247	0.127402
YDR438W	THI74	4	1.38073	0.734141	0.0763042	0.581736	0.741969	0.334616	-1.07809	1.2767	0.46415
YDR439W	LRS4	4	-1.14579	2.07941	0.437958	-0.648271	2.21349	0.697879	0.857486	0.674504	0.314288
YDR440W	DOT1	4	-0.0149268	0.374218	0.95547	-0.0783166	0.519156	0.843948	0.0264323	0.525679	0.972347
YDR441C	APT2	4	0.454864	0.470909	0.224112	0.421968	0.413794	0.240942	0.160544	0.728627	0.853741
YDR446W	ECM11	4	0.141034	0.228348	0.390126	0.571679	0.655283	0.296381	0.951247	1.14246	0.467997
YDR447C	RPS17B	3	-3.00704	0.136923	0.00792084	-3.24728	0.611917	0.0534972	-0.796143	1.0568	0.60485
YDR451C	YHP1	4	1.91554	0.595338	0.0305297	1.20359	0.445637	0.0553091	-0.830221	1.01352	0.471731
YDR452W	PPN1	4	0.657026	0.390104	0.0926676	0.138747	0.598174	0.75999	-0.688585	0.475493	0.269257
YDR453C	TSA2	4	2.43961	0.730553	0.0287285	2.30468	0.643022	0.0338667	0.307179	0.417258	0.517246
YDR456W	NHX1	4	-2.79536	0.453151	0.0106212	-2.5103	0.459465	0.0170106	0.194871	0.115306	0.222129
YDR457W	TOM1	4	-0.0942686	0.346121	0.695489	0.612812	0.343796	0.104817	1.41473	0.139495	0.00795716
YDR458C	HEH2	4	-2.15234	0.286371	0.00763877	-1.22376	0.435564	0.0520444	1.47315	0.859261	0.217585
YDR459C	PFA5	4	1.16713	0.427637	0.0401628	0.759134	0.25967	0.0482783	-0.402586	0.563437	0.532059
YDR463W	STP1	4	-1.61546	0.667133	0.0495525	-1.3503	0.994922	0.160125	0.356189	0.823015	0.70928
YDR465C	RMT2	4	-0.509738	0.727512	0.339531	-1.47863	1.11617	0.166098	-1.70361	1.32578	0.312203
YDR466W	PKH3	4	0.530734	0.17317	0.0333277	-0.100982	0.240545	0.579933	-0.916081	0.450367	0.171158
YDR467C	YDR467C	4	0.311774	0.441998	0.336926	0.0773746	0.190083	0.591473	-0.229967	0.761873	0.798344
YDR469W	SDC1	4	1.0867	0.112339	0.00499334	1.00124	0.505483	0.0888484	0.170692	0.80666	0.860428
YDR470C	UGO1	4	1.32262	0.196567	0.00919172	1.05224	0.15985	0.0132901	-0.126203	0.60009	0.86126
YDR471W	RPL27B	4	2.04614	0.3442	0.0112547	2.47999	0.523314	0.0213665	1.27599	0.389197	0.0828112
YDR475C	JIP4	4	1.17082	0.762636	0.108468	-0.0771599	0.959208	0.918977	-1.93	0.897817	0.157721
YDR479C	PEX29	4	0.49428	0.261257	0.0756873	1.1816	0.32497	0.0332223	1.47731	0.510056	0.101708
YDR480W	DIG2	4	0.496892	0.391192	0.148244	0.384899	0.44476	0.299061	0.023694	1.12983	0.987879
YDR481C	PHO8	4	-0.521062	0.724315	0.329001	-0.361357	1.0417	0.649005	0.347544	0.904162	0.740091
YDR482C	CWC21	4	0.146251	0.255609	0.423607	0.0364254	0.18768	0.798714	-0.0310588	0.334325	0.944058
YDR485C	VPS72	4	-0.864746	0.34812	0.0473206	-0.551583	0.262622	0.081281	0.569172	0.474034	0.330538
YDR486C	VPS60	4	0.211409	0.197303	0.191852	0.827832	0.862482	0.260422	1.30098	1.2435	0.376374
YDR488C	PAC11	4	0.322389	0.599468	0.447907	-0.149802	0.566363	0.726352	-0.66076	0.753233	0.44745
YDR491C	YDR491C	4	-0.361615	0.190046	0.0749376	-0.248242	0.592944	0.580971	0.289952	1.04244	0.814975
YDR494W	RSM28	4	-1.12765	0.20193	0.0123012	-0.441828	0.31649	0.154044	1.20308	0.450559	0.111523
YDR497C	ITR1	4	0.712456	0.206156	0.0270175	0.830993	0.152575	0.0170509	0.479139	0.284127	0.222524
YDR500C	RPL37B	4	0.573649	0.710188	0.284648	0.553116	0.587138	0.267692	0.202919	0.509577	0.729264
YDR503C	LPP1	4	0.364386	0.40256	0.244151	0.104806	0.482294	0.775965	-0.266966	1.08729	0.837803
YDR504C	SPG3	4	0.387654	0.633505	0.393564	-0.247476	0.141377	0.107816	-0.946242	0.903674	0.376006
YDR508C	GNP1	4	-1.50729	0.337088	0.0174297	-1.57783	0.349062	0.0230299	-0.236374	0.565617	0.717266
YDR509W	YDR509W	4	-0.861541	0.537785	0.100648	-1.0518	0.990107	0.228719	-0.346071	1.35569	0.831689
YDR511W	SDH7	4	0.561735	0.228738	0.0483616	-0.219663	0.460148	0.531495	-1.18318	0.60633	0.180651
YDR512C	EMI1	4	-2.64454	1.45938	0.081292	7.49258	0.894646	0.00914677	18.1422	0.880435	0.00136845
YDR513W	GRX2	4	-0.613771	0.654246	0.232826	-0.712505	0.643141	0.215942	-0.138106	0.682657	0.867509
YDR514C	YDR514C	4	-0.77488	0.299532	0.043923	-0.905736	0.47458	0.0936284	-0.223508	0.95676	0.845671
YDR517W	GRH1	4	0.049858	0.285891	0.801753	-0.492958	0.252538	0.0908348	-0.834856	0.433605	0.18415
YDR518W	EUG1	4	0.681373	0.65562	0.20123	0.819134	0.695653	0.198107	0.508905	0.716568	0.534329
YDR519W	FPR2	4	-0.992436	0.175453	0.0120535	-1.36887	0.176834	0.0102635	-0.706658	0.553306	0.313578
YDR520C	URC2	4	-0.527677	0.290135	0.0807567	-0.559171	0.64596	0.299061	-0.00137777	0.827527	0.99887
YDR522C	SPS2	4	0.366227	0.580686	0.381566	0.515154	0.335181	0.132828	0.476465	0.41161	0.341213
YDR523C	SPS1	4	1.16234	0.772695	0.112426	0.535823	0.668301	0.326337	-0.8009	1.27298	0.580917
YDR524C	AGE1	4	1.0655	1.29997	0.279257	0.120017	1.25617	0.90416	-1.39735	0.217353	0.0220956
YDR525W	API2	4	0.0195526	0.377957	0.941744	-0.844191	0.755575	0.213537	-1.42373	1.28192	0.355224
YDR528W	HLR1	4	0.837291	0.205034	0.0202211	0.481321	0.21846	0.0757016	-0.36315	0.578789	0.581267
YDR529C	QCR7	4	-12.8128	0.512196	0.00125834	8.68777	0.722118	0.00522999	37.1116	0.837355	0.000215531
YDR530C	APA2	4	0.327004	0.261521	0.151904	0.476318	0.734296	0.409242	0.470602	1.11729	0.71701
YDR533C	HSP31	4	-0.403693	0.498542	0.283665	-0.739993	0.756302	0.253696	-0.535101	0.698731	0.50002
YEL001C	IRC22	4	-0.308426	0.213613	0.120008	-0.289328	0.335587	0.300011	0.127357	0.797004	0.900703
YEL003W	GIM4	4	-1.92615	0.221873	0.00614638	-1.42692	1.02065	0.15383	0.729961	1.60687	0.693986
YEL004W	YEA4	4	-0.0304005	0.180725	0.809108	-0.285982	0.395617	0.365913	-0.325777	0.50062	0.571552
YEL005C	VAB2	4	-0.43353	0.231855	0.0771583	-0.25551	0.52842	0.527221	0.395514	0.781853	0.662244
YEL006W	YEA6	4	1.22938	0.632929	0.0719396	0.599622	0.793021	0.349527	-0.795569	0.902145	0.445688
YEL014C	YEL014C	4	-0.406285	0.257169	0.102913	-0.438653	0.369386	0.196392	0.0173541	0.69002	0.987065
YEL016C	NPP2	4	0.418806	0.651063	0.374042	0.559683	0.547001	0.240175	0.470623	0.320884	0.265353
YEL017W	GTT3	4	0.626053	0.154848	0.0206011	0.680809	0.492416	0.156116	0.348652	0.869408	0.727889
YEL025C	YEL025C	4	0.196058	0.481799	0.558842	0.285523	0.331504	0.300418	0.33981	0.314946	0.368857
YEL028W	YEL028W	4	1.29621	0.759407	0.0905019	0.909854	0.821993	0.215944	-0.341598	0.348328	0.402078
YEL037C	RAD23	4	0.258895	0.399971	0.372018	0.346978	0.645951	0.484083	0.347817	0.886302	0.734618
YEL038W	UTR4	4	0.145589	0.924795	0.822391	-0.428992	0.956508	0.555736	-0.876615	0.263864	0.0817046
YEL039C	CYC7	4	0.319866	0.382227	0.272036	0.0299677	0.347576	0.913899	-0.329572	0.257061	0.312703
YEL040W	UTR2	4	-1.18992	0.235625	0.0144568	-1.67165	0.630684	0.0563909	-0.931277	1.43688	0.571738
YEL048C	TCA17	4	0.60966	0.195695	0.0324088	0.84791	0.341617	0.0622726	0.679704	0.666222	0.387458
YEL049W	PAU2	4	0.120578	0.365958	0.633503	0.594763	0.317432	0.0966682	1.02703	0.902433	0.34611
YEL052W	AFG1	4	-0.62622	0.451404	0.127553	-0.593725	0.674236	0.292546	0.0985311	0.757249	0.920786
YEL059W	HHY1	3	-0.0393617	0.272316	0.865031	0.398466	0.122824	0.0912025	0.934116	0.417078	0.264445
YEL071W	DLD3	4	0.388085	1.02682	0.58711	0.239394	0.940677	0.736721	-0.0612803	0.0589138	0.379385
YEL072W	RMD6	4	0.444211	0.311929	0.122657	0.375669	0.478433	0.334359	0.0939172	1.10196	0.948272
YER005W	YND1	4	1.20308	0.247828	0.0152139	0.2298	0.490761	0.539162	-1.42488	1.14102	0.317179
YER007C-A	TMA20	4	-1.09618	0.166614	0.00949421	-0.741096	0.458684	0.122945	0.606683	0.855715	0.535157
YER007W	PAC2	2	0.406875	0.671856	0.626772	0.157885	1.64017	0.939453	-0.240589	1.87395	0.95316
YEL047C	FRD1	4	0.0609297	0.149982	0.559478	-0.334342	0.185112	0.102599	-0.78614	0.363271	0.156125
YER001W	MNN1	4	-0.0378047	0.308142	0.862228	-0.206552	0.193058	0.226582	-0.31134	0.483182	0.572756
YER002W	NOP16	3	1.55192	0.697706	0.118078	1.41621	0.751674	0.174325	0.460256	0.619207	0.607677
YER016W	BIM1	4	-1.51995	0.222917	0.00902656	-1.43097	0.289601	0.0200065	-0.370885	1.06141	0.764354
YER019C-A	SBH2	4	1.07314	0.383788	0.0385932	0.620554	0.570076	0.221688	-0.47404	0.747655	0.578617
YER020W	GPA2	3	-3.67916	0.270759	0.0133773	-3.46522	0.288808	0.0205962	-1.03049	0.2126	0.115556
YER024W	YAT2	4	0.666884	0.201092	0.0290755	0.440063	0.321657	0.158275	-0.135612	0.697537	0.875056
YER027C	GAL83	4	0.606936	0.116155	0.0136624	-0.162349	0.692761	0.757746	-1.40239	1.47912	0.414934
YER028C	MIG3	4	-0.0990313	0.0882829	0.178405	-0.197182	0.187444	0.231972	-0.176704	0.569873	0.791987
YER030W	CHZ1	4	-0.832713	0.100613	0.00656446	-0.861099	0.310123	0.0531971	-0.338392	0.743595	0.693735
YER033C	ZRG8	4	1.73393	0.439032	0.0214663	1.16253	0.163027	0.0114269	-0.45644	0.6243	0.520628
YER035W	EDC2	4	0.560806	0.656122	0.264261	0.278891	0.802961	0.648616	-0.308049	0.733973	0.717266
YER037W	PHM8	4	-0.335714	0.662095	0.4712	-0.585464	0.683781	0.30239	-0.627018	0.40402	0.24764
YER038W-A	YER038W-A	4	0.18085	0.171527	0.196863	0.0422554	0.265208	0.8356	-0.146652	0.58539	0.834899
YER039C	HVG1	4	-0.388917	0.254515	0.109183	-0.138493	0.184189	0.351203	0.493512	0.64705	0.502716
YER041W	YEN1	4	0.127808	0.529432	0.728532	0.294245	0.411354	0.370251	0.527684	0.943301	0.626814
YER042W	MXR1	4	-0.000502272	0.231118	0.997514	-0.163943	0.27245	0.438192	-0.282873	0.307848	0.427709
YER044C-A	MEI4	4	-0.176714	0.136055	0.143026	-0.248303	0.246773	0.24524	-0.149973	0.67273	0.851522
YER045C	ACA1	4	0.394842	0.430568	0.239846	0.221989	0.451211	0.520305	-0.131304	0.384892	0.771267
YER046W-A	YER046W-A	4	0.158595	0.319701	0.48026	0.583515	0.480079	0.189682	1.13228	0.601642	0.190752
YER047C	SAP1	4	-0.505056	0.312083	0.0993559	-0.151299	0.410439	0.626955	0.67897	0.514416	0.302796
YER048C	CAJ1	4	0.941676	0.464641	0.0669489	0.92045	0.223431	0.0267864	0.454864	0.543864	0.465971
YER049W	TPA1	4	-1.01939	0.207275	0.0150697	-1.30246	0.542085	0.0656389	-1.00254	0.964479	0.379385
YER051W	JHD1	4	0.78634	0.123339	0.0100823	0.533439	0.237165	0.0730799	-0.142952	0.323851	0.705006
YER052C	HOM3	4	-0.162114	0.240094	0.355084	1.63226	0.533414	0.0447146	4.1236	0.824834	0.038092
YER053C	PIC2	4	-0.0691125	0.636877	0.876568	0.038083	0.281834	0.861635	0.305991	1.13585	0.821548
YER054C	GIP2	4	0.583997	0.103703	0.0121608	0.0827006	0.666686	0.873449	-0.799586	1.62853	0.671147
YER056C	FCY2	4	-0.138313	0.402222	0.619521	-0.0516847	0.293981	0.818481	0.228658	0.35423	0.572738
YER057C	HMF1	4	-0.243017	0.399568	0.395727	-0.240933	0.396228	0.434778	-0.0105255	0.460289	0.987065
YER058W	PET117	4	-12.059	0.267453	0.000604357	8.33756	0.188435	0.00147171	41.4553	0.635219	0.000133698
YER060W	FCY21	4	-0.630607	0.184974	0.0278304	-0.608597	0.299081	0.0854821	-0.134655	0.576848	0.845671
YER060W-A	FCY22	4	0.549394	0.4114	0.136002	0.200713	0.702818	0.706034	-0.465729	0.882408	0.647707
YER062C	GPP2	4	1.03928	0.377151	0.0394991	0.762424	0.324264	0.0678103	-0.0869882	0.202712	0.711979
YER065C	ICL1	4	-0.86037	0.406641	0.0620135	-0.824088	0.242736	0.0374112	-0.202615	0.453779	0.700965
YER066C-A	YER066C-A	4	-0.223995	0.352102	0.37872	-0.324893	0.388913	0.312066	-0.237699	0.540124	0.705477
YER067C-A	YER067C-A	4	-0.39734	0.34106	0.168328	-0.43677	0.211891	0.0835015	-0.173029	0.553476	0.791217
YER071C	TDA2	4	0.108748	0.140213	0.300992	0.0576831	0.274423	0.782565	0.0219463	0.619475	0.982068
YER072W	VTC1	4	0.0206472	0.311707	0.924003	0.0227677	0.600234	0.959531	0.105	1.03027	0.937677
YER073W	ALD5	4	-0.338319	0.374879	0.245217	-0.34204	0.432244	0.331098	-0.065524	0.65932	0.938336
YER075C	PTP3	4	0.673875	0.955335	0.336926	0.486039	0.919554	0.490657	-0.0433985	0.361736	0.926005
YER079W	YER079W	4	-0.870079	0.395889	0.0579984	-0.88491	0.0452602	0.00260152	-0.323754	0.688497	0.683667
YER080W	AIM9	4	0.370966	0.41775	0.250454	0.0425777	0.610167	0.928322	-0.497444	0.632936	0.487987
YER081W	SER3	4	0.618709	0.156794	0.0214711	0.438627	0.649753	0.393199	-0.0498187	1.32518	0.980204
YER084W	YER084W	4	0.338546	0.286605	0.165442	0.191466	0.523597	0.629486	-0.0970144	0.905745	0.934653
YER085C	YER085C	4	1.44228	0.993406	0.119261	0.950832	0.834591	0.208044	-0.401284	1.39046	0.807433
YER086W	ILV1	4	-2.28678	0.138619	0.00211788	-1.46162	0.332636	0.0238315	0.976922	0.8409	0.339723
YER087C-A	YER087C-A	4	-0.211493	0.124802	0.0914903	-0.416292	0.30499	0.158874	-0.469831	0.522352	0.436445
YFL011W	HXT10	4	0.89236	0.749803	0.163772	0.363843	1.08334	0.659073	-0.726826	1.62259	0.69992
YFL015C	YFL015C	4	0.603703	0.193978	0.0324088	0.446589	0.288079	0.131616	-0.00386478	0.67944	0.996211
YFL020C	PAU5	4	0.219864	0.303467	0.326441	-0.106727	0.113898	0.269088	-0.55949	0.750379	0.512152
YFL021W	GAT1	4	0.690707	0.385755	0.0829667	0.65405	0.668067	0.253696	0.309694	0.961642	0.785196
YFL025C	BST1	4	-1.24681	0.952523	0.141146	-1.7682	1.24136	0.149136	-1.64713	1.31215	0.316901
YFL027C	GYP8	4	-0.638815	0.526236	0.159512	-0.495986	0.572811	0.299033	0.138045	0.483845	0.809525
YFL028C	CAF16	4	0.859445	0.605466	0.123233	0.280169	0.640512	0.564674	-0.857315	0.43486	0.178916
YFL030W	AGX1	4	2.43038	0.784894	0.0326609	2.0038	0.663038	0.0457382	0.179678	0.571209	0.790306
YFL032W	YFL032W	3	-2.41128	0.232237	0.0178005	-1.93277	0.796193	0.129891	0.129668	1.39163	0.953327
YFL034W	YFL034W	4	-0.0405694	0.190017	0.759117	-0.0849625	0.293874	0.702497	-0.0281723	0.47249	0.966623
YFL040W	YFL040W	4	3.07188	0.508833	0.0110292	2.07784	0.316093	0.0132901	-0.837151	0.318108	0.113303
YFL041W	FET5	4	0.290822	0.299822	0.222816	0.533807	0.374706	0.149136	0.774112	0.460767	0.223389
YFL043C	YFL043C	4	-0.114585	0.354839	0.640541	0.176579	0.602206	0.697592	0.706791	0.726147	0.40681
YFL044C	OTU1	4	-0.748659	0.393511	0.0749376	-0.531957	0.386085	0.15674	0.258889	0.312094	0.468832
YFL046W	FMP32	4	-0.520446	0.334556	0.10568	-0.793294	0.320197	0.0624546	-0.760721	0.662257	0.344982
YFL047W	RGD2	4	-0.500299	0.373142	0.135289	-0.1365	0.497491	0.716007	0.704018	0.627093	0.351029
YFL048C	EMP47	4	0.4166	0.335739	0.153669	0.51832	0.551977	0.268535	0.50613	0.971988	0.653419
YFL049W	SWP82	4	1.31959	0.456714	0.0366847	1.13432	0.675774	0.114861	0.24518	0.704399	0.765393
YFL050C	ALR2	4	-0.693442	0.351587	0.0701702	-0.723712	0.522677	0.155833	-0.281724	0.724345	0.736544
YFL051C	YFL051C	4	-0.504239	0.41929	0.161545	-1.03689	0.690341	0.137586	-1.34776	1.09547	0.320625
YFL052W	YFL052W	4	1.59817	0.452353	0.0259533	0.991933	0.364871	0.054857	-0.59554	0.641365	0.423049
YFL053W	DAK2	4	-0.338562	0.270489	0.151627	-0.223086	0.606874	0.627915	0.206953	1.02418	0.867509
YFL054C	YFL054C	4	0.777745	0.503283	0.107015	0.679852	0.648038	0.232663	0.207764	0.631202	0.78084
YFL055W	AGP3	4	-0.560161	0.403024	0.127107	-0.568185	0.458836	0.184221	-0.172494	0.479041	0.756353
YFL056C	AAD6	4	0.86771	0.399328	0.0591259	0.440194	0.404616	0.221746	-0.506643	0.497195	0.387686
YFR006W	YFR006W	4	0.211317	0.324216	0.369176	0.186027	0.26623	0.37929	0.125797	0.757841	0.898233
YFR007W	YFH7	4	-0.0496961	0.0870486	0.424366	0.0571034	0.390505	0.848915	0.313587	0.801261	0.735216
YFR009W	GCN20	4	-2.54881	0.150096	0.00203314	-2.21756	0.308389	0.0113108	-0.267318	0.485983	0.63609
YFR011C	MIC19	4	-0.655955	0.569674	0.171437	0.326127	0.698144	0.53995	2.04979	0.939407	0.15364
YFR012W	DCV1	4	0.276576	0.215983	0.146522	0.297652	0.442333	0.394309	0.260402	0.801086	0.781744
YFR013W	IOC3	4	0.95421	0.40611	0.0520711	0.237223	0.669067	0.641163	-1.13075	1.09116	0.379611
YFR014C	CMK1	4	0.493578	0.343889	0.121155	0.242463	0.558512	0.567575	-0.267047	0.977547	0.819405
YFR015C	GSY1	4	0.658623	0.232316	0.0376983	0.546946	0.260899	0.0814277	0.124088	0.675959	0.884284
YFR016C	YFR016C	4	-0.957457	1.14794	0.273494	-1.47403	0.677682	0.0771346	-1.50942	0.915904	0.228918
YFR017C	IGD1	4	2.06875	0.360098	0.0118782	1.06818	0.328597	0.0402581	-1.2913	0.505465	0.118213
YFR018C	YFR018C	4	0.0309229	0.239789	0.854436	-0.633683	0.529981	0.194911	-1.4152	1.33558	0.373172
YFR020W	YFR020W	4	-0.835981	0.521158	0.100492	-0.660525	0.564069	0.199804	0.126334	0.899005	0.913075
YFR021W	ATG18	4	-2.67594	0.217266	0.00328582	-2.05395	0.163551	0.00514253	0.341909	0.521438	0.567764
YFR022W	ROG3	4	0.555029	0.227164	0.0487643	0.879847	0.246073	0.0338667	1.07693	0.873053	0.320192
YFR023W	PES4	4	-0.976597	0.67382	0.119584	-1.16897	0.602228	0.0912497	-0.776405	0.784621	0.398088
YFR024C-A	LSB3	4	1.22352	0.327027	0.0235052	1.04913	0.504891	0.0823347	0.228005	0.752662	0.797398
YFR026C	ULI1	4	1.21598	0.165139	0.00785633	0.774585	0.199518	0.0295939	-0.385894	0.168978	0.141597
YGL002W	ERP6	4	-0.551767	0.130688	0.0191135	-0.483953	0.33524	0.146268	0.00461053	0.699756	0.996208
YGL003C	CDH1	2	-0.66918	0.461857	0.374453	-0.240103	0.461277	0.695912	0.779357	0.200888	0.358942
YGL004C	RPN14	4	0.540697	0.311389	0.0878	0.396624	0.295454	0.162825	-0.00162822	0.456243	0.997303
YGL007W	BRP1	4	0.792293	1.11775	0.334949	2.15348	1.01585	0.08012	3.55084	0.760129	0.0440292
YGL010W	MPO1	4	-0.129846	0.694239	0.78851	-0.272235	0.340914	0.327798	-0.291364	0.910861	0.786552
YGL013C	PDR1	4	0.539458	0.87376	0.390198	0.54105	0.964283	0.46677	0.330943	0.912021	0.755511
YGL014W	PUF4	4	-2.24524	0.247622	0.00569055	-1.94575	0.756889	0.0591225	-0.207031	1.30685	0.900703
YGL015C	YGL015C	4	0.885111	0.170825	0.0138842	0.833009	0.318578	0.057568	0.359491	0.739597	0.672763
YGL016W	KAP122	4	-1.73191	0.132003	0.00292934	-1.29185	0.324948	0.0283939	0.339173	0.617164	0.63609
YGL017W	ATE1	4	-0.360569	0.169656	0.0616572	-0.214691	0.457881	0.538943	0.266842	1.07437	0.835996
YGL019W	CKB1	4	-2.78792	0.493596	0.0120795	-2.10654	0.390355	0.0172256	0.4287	0.812877	0.647997
YGL021W	ALK1	4	0.243987	0.300236	0.282538	0.427525	0.268022	0.12558	0.617659	0.581869	0.373172
YGL023C	PIB2	4	-1.11188	0.443884	0.0466155	-1.47309	0.461029	0.0416293	-1.22175	0.417596	0.101393
YGL026C	TRP5	4	0.346643	0.212192	0.0979753	-0.129874	0.348949	0.623476	-0.846842	0.478898	0.207359
YGL027C	CWH41	4	0.686787	0.274395	0.0466376	0.393704	0.592651	0.399669	-0.27843	0.961317	0.807323
YGL028C	SCW11	4	0.729776	0.191263	0.0227764	0.571374	0.247608	0.070253	0.0483881	0.312715	0.901265
YGL032C	AGA2	4	0.773437	0.105158	0.00786124	0.718791	0.34611	0.0823856	0.304778	0.682481	0.700965
YGL033W	HOP2	4	1.23816	0.189893	0.00956096	0.884837	0.460013	0.0925608	-0.174791	0.907761	0.876327
YGL034C	YGL034C	4	0.621197	0.147117	0.0191135	0.763873	0.499002	0.133576	0.689368	0.885912	0.492903
YGL035C	MIG1	4	1.33495	0.273895	0.015146	0.840523	0.432588	0.0912025	-0.455083	1.09722	0.719804
YGL037C	PNC1	4	-0.0603335	0.352362	0.805542	-0.412248	0.381232	0.223244	-0.740081	0.42493	0.212665
YGL039W	YGL039W	4	0.245127	0.576939	0.541527	0.116072	0.603628	0.800307	-0.0966943	0.617771	0.900703
YGL041C	YGL041C	4	-0.536618	0.216182	0.0473206	-0.795636	0.439918	0.102362	-0.736173	0.67178	0.36195
YGL043W	DST1	4	-1.41044	0.430746	0.0297017	-1.15981	0.331393	0.0353543	0.0467281	0.65763	0.958184
YGL046W	YGL046W	4	-1.41202	1.16084	0.15888	-0.966201	0.933097	0.236665	0.4924	0.653002	0.507541
YGL049C	TIF4632	4	1.35911	0.296355	0.0167664	1.44416	0.225143	0.0136974	0.880665	0.259637	0.078982
YGL051W	MST27	4	0.986993	0.549484	0.082475	0.895866	0.356076	0.0611721	0.314853	0.767056	0.721539
YGL053W	PRM8	4	-0.659599	0.180813	0.0246114	-0.655854	0.341109	0.0925608	-0.189118	0.967786	0.874218
YGL054C	ERV14	4	-2.95007	0.566056	0.0137435	-3.41006	0.385712	0.00823723	-2.25246	0.575687	0.0601486
YGL056C	SDS23	4	1.01086	0.337347	0.0346978	0.493252	0.290451	0.112902	-0.65	0.812324	0.481241
YGL057C	GEP7	4	-1.57707	0.471019	0.0285987	0.468054	0.528556	0.291118	4.07752	0.556921	0.0168578
YGL060W	YBP2	4	-0.356571	0.28335	0.150517	-0.652748	0.178647	0.033001	-0.74232	0.446994	0.226622
YGL062W	PYC1	4	0.555188	0.341252	0.09858	0.194086	0.271691	0.370853	-0.491598	0.633931	0.495111
YGL063W	PUS2	4	0.610923	0.347384	0.0858343	0.518427	0.236213	0.0762223	0.147068	0.940027	0.900703
YGL067W	NPY1	4	0.212118	0.155772	0.131759	0.485632	0.386913	0.181035	0.809467	0.77652	0.378581
YGL071W	AFT1	4	-2.70821	0.621659	0.0182067	-1.60088	0.916267	0.108232	1.43767	1.01457	0.276583
YGL077C	HNM1	4	0.166619	0.384294	0.533725	-0.0858587	0.260029	0.664677	-0.413318	0.361989	0.345466
YGL079W	KXD1	4	-0.957505	0.247629	0.0223578	-1.08501	0.428391	0.0604693	-0.619708	0.640831	0.407846
YGL081W	YGL081W	4	-0.709794	0.644335	0.183582	-0.733944	0.722119	0.24159	-0.274886	1.13197	0.839896
YGL083W	SCY1	4	-0.399564	0.507883	0.295298	-0.433845	0.52389	0.314684	-0.162228	0.476249	0.771429
YGL086W	MAD1	4	0.440442	0.293392	0.112871	0.16009	0.442053	0.633043	-0.357174	1.08939	0.780928
YGL087C	MMS2	4	-1.17846	0.531337	0.0574509	-1.10484	0.577589	0.0933169	-0.256501	0.469161	0.636968
YGL090W	LIF1	4	0.0946991	0.28598	0.632247	-0.0295004	0.375434	0.920422	-0.151453	0.392561	0.73818
YGL094C	PAN2	4	1.33682	0.220576	0.0109741	1.38895	0.429613	0.0406244	0.795633	0.581685	0.28937
YGL095C	VPS45	4	-0.364339	0.676289	0.447145	-0.361951	0.584042	0.427267	-0.062947	0.703626	0.945958
YGL101W	YGL101W	4	-0.34199	0.214214	0.101161	-0.538798	0.734351	0.36058	-0.508693	1.30491	0.736127
YGL104C	VPS73	4	-0.319188	0.898386	0.608775	-0.052724	1.00028	0.944852	0.560723	0.657396	0.459838
YGL108C	YGL108C	4	0.00995386	0.166861	0.931323	0.262176	0.448027	0.449278	0.672263	1.24948	0.643426
YGL109W	YGL109W	4	-0.153064	0.55622	0.692387	0.0962704	0.56915	0.825062	0.594286	0.457032	0.30777
YGL114W	YGL114W	4	-0.308195	0.580003	0.451399	0.0285041	0.623253	0.952421	0.726153	0.508441	0.273787
YGL115W	SNF4	4	-4.57574	0.451368	0.00459515	-2.79776	0.728917	0.0302976	2.15369	1.10334	0.180651
YGL117W	YGL117W	4	-0.521501	0.158673	0.0295031	-0.127777	0.19611	0.407169	0.763169	0.164567	0.0447965
YGL118C	YGL118C	4	0.412233	0.363061	0.174709	0.408985	0.357766	0.20703	0.264172	0.173204	0.253731
YGL121C	GPG1	4	-0.812524	0.220445	0.0242373	-0.905892	0.301546	0.046096	-0.478157	0.795156	0.598685
YGL125W	MET13	4	0.67896	0.244078	0.038846	0.760796	0.272692	0.0528393	0.575526	0.814036	0.536027
YGL126W	SCS3	4	-0.2059	0.557377	0.595359	0.0123607	0.78764	0.983415	0.500091	0.804464	0.585426
YGL132W	YGL132W	4	0.426246	0.367394	0.169487	0.0703406	0.16392	0.572175	-0.536167	0.471505	0.34611
YGL133W	ITC1	4	1.20953	0.266593	0.0170055	0.913692	0.11347	0.00976085	-0.0558544	0.501578	0.931396
YGL139W	FLC3	4	-0.687668	0.32599	0.0623489	-1.14091	0.681008	0.115087	-1.24647	1.30095	0.410506
YGL140C	YGL140C	4	0.129567	0.385352	0.626968	0.293831	0.409821	0.369431	0.523487	0.652855	0.481072
YGL141W	HUL5	4	1.38137	0.48945	0.0380233	-0.216763	0.401114	0.481831	-2.95877	0.326767	0.0102021
YGL144C	ROG1	4	-0.343171	0.319921	0.191497	-0.505687	0.34966	0.145885	-0.43079	0.408779	0.374093
YGL149W	YGL149W	4	-6.29923	0.526558	0.00339655	-6.15281	0.655753	0.00753885	-2.33205	0.554609	0.0533786
YGL151W	NUT1	4	-1.32075	1.35623	0.221695	-1.32626	0.905775	0.143516	-0.499743	0.739779	0.555116
YGL152C	YGL152C	4	0.21864	0.231937	0.231368	0.733768	0.399571	0.099383	1.36486	0.635795	0.157721
YGL153W	PEX14	4	-0.0701502	0.267072	0.705749	0.148312	0.332436	0.557653	0.559987	0.679357	0.469121
YGL156W	AMS1	4	-0.0388648	0.497077	0.910691	0.129796	0.570397	0.765328	0.459796	0.386039	0.332939
YGL157W	ARI1	4	0.938073	0.251671	0.0236262	0.902815	0.473096	0.0936284	0.421198	0.788078	0.645052
YGL161C	YIP5	4	0.938889	0.585463	0.100492	0.478335	0.553396	0.299061	-0.551033	0.309385	0.205724
YGL162W	SUT1	4	1.4614	0.257733	0.0120113	1.76695	0.334466	0.0177741	1.42972	0.371915	0.0614773
YGL163C	RAD54	4	-2.72651	0.630026	0.0184365	-2.45017	0.536204	0.0227807	-0.470683	0.44516	0.373655
YGL164C	YRB30	4	-0.0736194	0.361324	0.769572	-0.133307	0.313149	0.575069	-0.0776192	0.228752	0.77259
YGL166W	CUP2	4	-0.568641	0.24361	0.0526863	-0.937844	0.142662	0.0132901	-1.00217	0.346542	0.101708
YGL167C	PMR1	1	3.19723	NA	NA	5.67233	NA	NA	7.15114	NA	NA
YGL176C	YGL176C	4	-0.651213	0.195359	0.0288416	-0.645811	0.382964	0.114394	-0.181657	0.7627	0.842335
YGL177W	YGL177W	4	1.04701	0.246751	0.019011	0.675923	0.372532	0.101938	-0.299094	0.632211	0.681867
YGL179C	TOS3	4	0.363512	0.303268	0.162372	0.0361812	0.750284	0.949446	-0.498289	1.20591	0.721177
YGL181W	GTS1	4	0.937402	0.206378	0.0170055	0.593524	0.546805	0.22229	-0.284864	0.889135	0.786271
YGL194C	HOS2	4	3.13191	0.092558	0.000869866	1.77209	0.190783	0.00768612	-1.64734	0.580279	0.10364
YGL195W	GCN1	4	-2.08645	0.450419	0.0164506	-1.40285	0.525345	0.0561281	0.740884	0.585991	0.315635
YGL196W	DSD1	4	-0.238861	0.185594	0.145255	-0.676149	0.852695	0.330222	-1.01348	1.64508	0.588279
YGL197W	MDS3	4	-3.33027	1.03219	0.0303831	-1.74439	0.412753	0.0255311	2.25969	1.05329	0.157721
YGL198W	YIP4	4	-0.920778	0.277767	0.0290762	-1.01414	0.480521	0.0807478	-0.525547	0.696554	0.507344
YGL202W	ARO8	4	-1.02444	0.496601	0.0648359	-1.72091	0.360615	0.0211075	-1.95013	0.612201	0.0856179
YGL203C	KEX1	4	-1.24737	0.436331	0.0371347	-0.641119	0.442049	0.145392	0.931379	0.382444	0.127402
YGL205W	POX1	4	0.341085	0.616992	0.436541	-0.0375686	0.685813	0.943312	-0.625476	0.815613	0.499209
YGL208W	SIP2	4	0.833356	0.298677	0.0386838	0.63682	0.282423	0.07283	0.00653003	1.06867	0.996208
YGL210W	YPT32	4	1.2249	0.442585	0.0392204	1.18589	0.348121	0.0371516	0.538182	0.687868	0.4907
YGL220W	FRA2	4	-1.47988	0.334169	0.0176752	-0.778157	0.375641	0.0826809	1.04791	0.55301	0.188998
YGL221C	NIF3	4	-0.679017	0.184373	0.0242669	-0.707387	0.344138	0.0840041	-0.271063	0.523899	0.655038
YGL222C	EDC1	4	-1.02566	0.393494	0.043432	-1.01767	0.25958	0.0290452	-0.339673	0.6684	0.660878
YGL224C	SDT1	4	1.13767	0.559084	0.0664757	1.07554	0.453205	0.0668899	0.447137	0.342996	0.306903
YGL226C-A	OST5	4	1.4716	0.602086	0.0487509	1.22201	0.474535	0.0589044	0.16464	0.333099	0.670285
YGL226W	MTC3	4	1.5755	0.865326	0.0807037	2.04665	0.775367	0.0567517	1.85836	0.446185	0.0540662
YGL227W	VID30	4	-0.544326	0.231181	0.0519175	-0.148325	0.269804	0.47478	0.758381	0.31817	0.131479
YGL228W	SHE10	4	-0.688702	0.240637	0.0370632	-0.660526	0.431734	0.13364	-0.145991	0.789827	0.883017
YGL229C	SAP4	4	0.344538	0.56778	0.396649	0.81204	0.710486	0.20703	1.31107	0.62426	0.162965
YGL230C	YGL230C	4	0.225385	0.570377	0.569317	-0.0475801	0.443988	0.892561	-0.43444	0.128398	0.0791093
YGL231C	EMC4	4	-0.390067	0.842179	0.508179	-0.468222	0.9048	0.499296	-0.258401	0.561259	0.688136
YGL234W	ADE5,7	4	0.813671	0.427449	0.0749153	0.629711	0.669398	0.268224	0.0266731	1.07164	0.987065
YGL236C	MTO1	4	-0.381913	0.158966	0.0502762	-0.0906398	0.229392	0.602538	0.589996	0.241266	0.126898
YGL237C	HAP2	4	-0.723705	0.201701	0.025283	5.5957	0.74014	0.0104549	14.2258	1.8212	0.0145844
YGL241W	KAP114	4	0.974392	0.369555	0.0426835	0.638616	0.237146	0.0554356	-0.250139	0.618684	0.726352
YGL248W	PDE1	4	0.297505	0.378855	0.29599	-0.185698	0.303079	0.43181	-0.883646	0.348793	0.118708
YGL249W	ZIP2	4	-1.49635	0.472087	0.0313776	-1.40995	0.809863	0.108881	-0.366447	1.15762	0.788187
YGL251C	HFM1	4	-0.349889	0.0982416	0.025515	-0.296102	0.204215	0.145402	0.0609221	0.365195	0.897511
YGL253W	HXK2	4	-1.71547	0.353868	0.0152301	-1.95485	0.629121	0.0433105	-1.2074	0.815566	0.263578
YGL254W	FZF1	4	-0.0997688	0.27139	0.597051	-0.0338812	0.793151	0.954598	0.198104	1.59113	0.923896
YGL255W	ZRT1	4	2.29069	0.815165	0.0382315	1.56586	0.766116	0.0848246	-0.563546	0.975105	0.614132
YGL256W	ADH4	4	0.459147	0.407694	0.177239	1.07831	0.570232	0.0950577	1.70808	0.577857	0.0997915
YGL257C	MNT2	4	-1.65901	0.263049	0.010184	-1.77139	0.421087	0.0256442	-0.892248	1.19547	0.512152
YGL258W	VEL1	4	0.403628	0.45075	0.247498	0.471357	0.535373	0.292546	0.422718	1.00732	0.717266
YGL259W	YPS5	4	1.0082	0.2726	0.0240637	0.743136	0.44083	0.11442	-0.0736243	0.665752	0.931854
YGL260W	YGL260W	4	0.588488	0.481103	0.15741	0.246279	0.351143	0.378164	-0.433812	0.56311	0.497167
YGL262W	YGL262W	4	2.53904	0.326899	0.00746172	1.83065	0.374305	0.0204003	-0.417191	0.283629	0.264445
YGL263W	COS12	4	-0.0525414	0.0942528	0.433295	0.140155	0.278771	0.511595	0.508775	0.723804	0.536467
YGR003W	CUL3	4	-1.42022	0.0846247	0.00206248	-1.2411	0.27325	0.022885	-0.121083	0.755358	0.900703
YGR004W	PEX31	4	0.434742	0.232665	0.0771689	0.713132	0.427535	0.11581	0.91809	0.845639	0.365768
YGR007W	ECT1	4	-0.613134	0.620506	0.217395	-0.645198	0.466099	0.155849	-0.250665	0.391305	0.573853
YGR008C	STF2	4	1.0288	0.466229	0.0577089	1.25974	0.270623	0.0220209	1.06968	0.667281	0.235581
YGR010W	NMA2	4	-0.779413	0.325223	0.0503718	-1.3765	0.347868	0.0285351	-1.61559	0.500194	0.0843448
YGR012W	YGR012W	4	0.114375	0.280637	0.558741	-0.096208	0.569781	0.825062	-0.340384	0.85275	0.728352
YGR014W	MSB2	4	-0.155381	0.42173	0.596382	-0.211473	0.347064	0.434169	-0.105194	0.324945	0.783065
YGR015C	YGR015C	4	0.774429	0.430983	0.0824506	0.51249	0.555175	0.275289	-0.168836	0.858189	0.873593
YGR016W	YGR016W	4	0.56448	0.430659	0.140898	0.465765	0.45623	0.240865	0.112511	0.568408	0.872162
YGR019W	UGA1	4	1.07347	0.212096	0.0144278	1.17045	0.127452	0.00782534	0.782898	0.367162	0.158777
YGR021W	YGR021W	4	0.879218	0.0443958	0.0016611	0.379402	0.379464	0.247027	-0.666944	0.809355	0.469121
YGR023W	MTL1	4	0.656539	0.408595	0.100302	0.407364	0.317442	0.174728	-0.191261	1.21631	0.900703
YGR027C	RPS25A	1	-5.25534	NA	NA	-4.6025	NA	NA	-0.716893	NA	NA
YGR033C	TIM21	4	-0.600141	0.31423	0.0743998	0.0500143	0.424809	0.880961	1.31516	0.618207	0.1595
YGR035C	YGR035C	4	0.819472	0.450263	0.080741	0.38769	0.464637	0.312468	-0.537518	0.649284	0.468925
YGR037C	ACB1	4	-2.76138	0.536105	0.0139598	-1.34977	0.646881	0.0819323	2.11022	0.544681	0.0610101
YGR039W	YGR039W	4	-0.567999	0.200427	0.0377078	-0.731212	0.164051	0.0234101	-0.53082	0.426522	0.317694
YGR042W	YGR042W	4	0.46333	0.370858	0.152011	0.0206981	0.3752	0.943242	-0.718262	0.849292	0.463664
YGR043C	NQM1	4	1.26936	0.993011	0.146884	0.948566	0.880526	0.224139	-0.0867389	0.570473	0.903805
YGR044C	RME1	4	0.675507	0.215518	0.0321072	0.700922	0.210588	0.0390075	0.444989	0.21549	0.167261
YGR045C	YGR045C	4	0.657224	0.179421	0.0244559	0.323377	0.209082	0.131814	-0.384594	0.202511	0.188951
YGR049W	SCM4	4	-0.386315	0.268797	0.120998	-0.703904	0.24753	0.0509963	-0.804309	0.761612	0.373655
YGR051C	YGR051C	4	-0.513988	0.158592	0.0302574	-0.211633	0.470292	0.554567	0.557512	0.817025	0.550931
YGR052W	FMP48	4	-0.310515	0.151922	0.065861	-0.132995	0.129073	0.238249	0.361118	0.390722	0.425282
YGR054W	YGR054W	4	-2.18069	0.127654	0.00203314	-2.31569	0.245547	0.00751052	-1.1724	0.59996	0.180651
YGR055W	MUP1	4	-0.379503	0.177566	0.0609305	-0.35956	0.109619	0.0398596	-0.0294407	0.502545	0.96777
YGR057C	LST7	3	-0.824006	0.0862604	0.0195682	-1.55125	0.382774	0.0711411	-1.93277	0.721677	0.22271
YGR058W	PEF1	3	-2.49246	0.429078	0.035547	-0.997569	0.550956	0.182918	2.41842	0.928998	0.228918
YGR059W	SPR3	4	0.465196	0.287118	0.0992418	0.0769659	0.471632	0.831518	-0.593037	0.550791	0.368916
YGR061C	ADE6	4	-0.479707	0.239212	0.0680334	-0.849455	0.446282	0.0941214	-0.964479	0.727939	0.301576
YGR062C	COX18	4	-12.1437	0.691484	0.00203314	8.54995	0.76411	0.005977	42.0974	0.520089	0.000133698
YGR066C	YGR066C	4	0.624946	0.18452	0.028098	0.18762	0.0776952	0.0652541	-0.635367	0.252515	0.120697
YGR067C	YGR067C	4	-0.00968076	0.23878	0.954957	0.0801302	0.274551	0.698892	0.292256	0.434377	0.556671
YGR068C	ART5	4	-2.43071	0.306821	0.00718609	-2.04274	0.503158	0.0271175	-0.0859049	0.975719	0.946304
YGR069W	YGR069W	4	0.210371	0.560453	0.589918	0.269973	0.427084	0.419829	0.319518	0.363299	0.446762
YGR070W	ROM1	4	-0.36804	0.177206	0.0638921	-0.363228	0.269911	0.162247	-0.0590252	0.589787	0.938336
YGR071C	ENV11	4	1.83815	0.205186	0.00577604	1.79912	0.27498	0.0133434	0.806643	0.342198	0.134549
YGR077C	PEX8	4	0.964922	0.509662	0.0755927	0.838794	0.45311	0.0980818	0.225148	0.530903	0.715172
YGR079W	YGR079W	4	1.30462	0.383046	0.0278499	1.1396	0.457618	0.0622591	0.284947	0.454858	0.581893
YGR084C	MRP13	4	2.20277	0.542569	0.0204814	3.98573	0.328554	0.00514253	5.13292	0.561667	0.00999089
YGR088W	CTT1	4	0.354121	0.18652	0.0752152	0.798076	0.475833	0.115016	1.26141	0.769866	0.231127
YGR096W	TPC1	4	0.56792	0.344629	0.0962683	0.610791	0.539709	0.209794	0.437805	0.792492	0.633963
YGR100W	MDR1	4	-0.554348	0.344651	0.100104	-0.331325	0.320033	0.236665	0.35842	0.295362	0.327344
YGR107W	YGR107W	4	-1.2219	0.125887	0.00498744	-1.11114	0.18866	0.0152536	-0.190595	0.52786	0.755903
YGR108W	CLB1	4	-1.00174	0.601177	0.0945194	-1.13219	0.452733	0.0618979	-0.645799	0.568053	0.34611
YGR109C	CLB6	4	-0.164321	1.20865	0.846013	-0.0427748	1.00287	0.954598	0.297123	0.124529	0.131353
YGR111W	YGR111W	4	0.0965634	0.704673	0.844844	-0.0937654	0.418403	0.769104	-0.301864	0.358562	0.465332
YGR112W	SHY1	4	-5.63751	0.269911	0.00149675	7.9491	0.100001	0.000748414	28.6934	0.522666	0.000166535
YGR122W	YGR122W	4	0.568221	0.527989	0.190942	1.16625	0.441801	0.0567517	1.7075	0.419078	0.0558804
YGR123C	PPT1	4	-0.360845	0.783828	0.510165	-0.497969	0.87487	0.461034	-0.380459	1.35597	0.813235
YGR124W	ASN2	4	-0.531482	0.306841	0.087952	-0.292853	0.64434	0.550775	0.404121	1.53899	0.826258
YGR135W	PRE9	1	-6.86339	NA	NA	-4.78863	NA	NA	1.83078	NA	NA
YGR136W	LSB1	4	-0.110253	0.536179	0.767587	-0.307819	0.46636	0.402394	-0.408965	0.614374	0.561319
YGR148C	RPL24B	3	0.41201	0.586367	0.434768	0.420475	0.549649	0.439407	0.29086	0.277149	0.484864
YGR184C	UBR1	4	1.07675	0.213981	0.0144829	1.3188	0.588225	0.0733969	1.11608	1.14808	0.406843
YGR196C	FYV8	4	-1.26965	0.580112	0.0584482	-0.63536	0.439065	0.145763	0.985742	0.301549	0.0828112
YGR207C	CIR1	4	-0.295993	0.554001	0.449957	-0.211996	0.549459	0.611003	0.153605	0.982019	0.900703
YGR129W	SYF2	4	-1.21687	0.113468	0.00412067	-0.879532	0.440428	0.0877444	0.566889	0.7679	0.515991
YGR130C	YGR130C	4	-0.189663	0.271486	0.340779	-0.461021	0.48721	0.265955	-0.358428	0.80647	0.702852
YGR131W	FHN1	4	1.43618	0.460867	0.0324088	1.54194	0.504368	0.0447784	0.613801	0.4388	0.281963
YGR133W	PEX4	4	0.623044	0.699538	0.249384	0.610738	0.086537	0.0116558	0.255785	1.03031	0.835996
YGR141W	VPS62	4	0.308977	0.543228	0.426027	0.227121	0.248526	0.278609	0.0739742	0.51151	0.909501
YGR142W	BTN2	4	-0.987975	0.258262	0.0226898	-0.87967	0.321665	0.0544554	0.190929	0.546487	0.764354
YGR143W	SKN1	4	0.567517	0.240846	0.05188	0.636003	0.370359	0.11063	0.392853	0.757445	0.654634
YGR144W	THI4	4	0.306851	0.444761	0.346192	0.131866	0.448657	0.697022	-0.0956861	0.419066	0.84777
YGR146C	ECL1	4	0.206423	0.440527	0.50371	0.0333431	0.490089	0.929965	-0.109934	0.754045	0.908862
YGR152C	RSR1	4	0.644029	0.376933	0.0904101	1.308	0.503138	0.0581296	1.48879	0.619828	0.130148
YGR154C	GTO1	4	-0.170184	0.0915181	0.0779098	-0.112202	0.309691	0.633043	0.24367	0.516364	0.682171
YGR155W	CYS4	1	0.999794	NA	NA	-0.0507926	NA	NA	-1.56513	NA	NA
YGR164W	YGR164W	4	-0.421643	0.776131	0.443258	-0.617491	0.98069	0.421191	-0.26208	1.41733	0.883017
YGR166W	TRS65	4	0.29394	0.547454	0.448208	0.00970721	0.429242	0.975254	-0.29655	0.718048	0.721177
YGR168C	YGR168C	4	0.0922064	0.0993998	0.23623	0.20881	0.145831	0.148233	0.3965	0.158825	0.122401
YGR169C	PUS6	4	0.37891	0.161434	0.0521499	0.154369	0.497002	0.683545	-0.17306	1.07925	0.900703
YGR170W	PSD2	4	-1.60228	0.220567	0.00802422	-1.80337	0.412343	0.0239855	-0.479807	0.679063	0.536234
YGR176W	YGR176W	4	-0.130548	0.389319	0.627776	-0.33148	0.660871	0.512395	-0.219987	0.934833	0.8444
YGR177C	ATF2	4	-1.1432	0.21724	0.013482	-1.01626	0.095213	0.0062475	0.197418	0.190047	0.379385
YGR181W	TIM13	4	0.0553297	0.571831	0.890117	-0.295155	0.805652	0.628971	-0.459059	0.972306	0.682171
YGR182C	YGR182C	4	1.78407	0.463365	0.0224827	2.85655	0.758396	0.0310191	2.43242	0.634102	0.0616605
YGR189C	CRH1	4	-0.973263	0.313555	0.0325075	-1.2845	0.241253	0.0176668	-0.5691	0.574148	0.397581
YGR192C	TDH3	4	-2.01536	0.217241	0.0054233	-2.18164	0.615808	0.0345278	-0.489384	0.870244	0.623705
YGR202C	PCT1	4	0.454646	0.159772	0.0374935	0.315136	0.454406	0.382444	-0.00513781	0.6528	0.995761
YGR205W	TDA10	4	0.304358	0.353131	0.260895	0.633141	0.233909	0.0551716	0.819606	0.321868	0.118213
YGR206W	MVB12	4	-0.82246	0.337865	0.0491546	-0.412677	0.737756	0.467277	0.768134	0.913779	0.46554
YGR212W	SLI1	4	-0.275753	0.191374	0.120423	-0.368711	0.541643	0.389613	-0.0493208	0.884866	0.969751
YGR213C	RTA1	4	0.478603	0.57994	0.276843	0.524324	0.803776	0.406645	0.335793	0.68246	0.670513
YHL003C	LAG1	4	1.54817	0.655119	0.051649	1.3238	0.59185	0.0737394	0.033442	0.80201	0.977453
YHL005C	YHL005C	4	-0.729906	1.5453	0.500598	10.26	1.19201	0.00862778	20.0166	0.738288	0.000704994
YHL006C	SHU1	4	0.06475	0.571749	0.872738	-0.29591	0.963543	0.686986	-0.475894	1.10266	0.710076
YHL008C	YHL008C	4	-0.177069	0.430394	0.554902	0.250009	0.41341	0.437159	0.913383	0.68632	0.299663
YHL009C	YAP3	4	-0.526616	0.562306	0.233248	-0.353056	0.777183	0.550867	0.390907	0.759862	0.656189
YHL012W	YHL012W	4	0.775696	0.942113	0.277586	0.670857	0.840133	0.327798	0.114502	0.563998	0.867401
YHL013C	OTU2	4	-1.86177	0.855309	0.058936	-1.96682	0.725784	0.0550521	-0.350991	0.96132	0.753508
YHL014C	YLF2	4	-0.0582973	0.197734	0.670583	-0.064377	0.253359	0.736721	0.14695	0.207263	0.535157
YHL016C	DUR3	4	1.24992	0.568059	0.0579838	0.695063	0.548071	0.177723	-0.619901	0.401537	0.250005
YHL019C	APM2	4	0.839924	0.209476	0.0208873	0.641981	0.778444	0.316416	-0.0434133	1.19225	0.981155
YHL020C	OPI1	4	-1.07921	0.379431	0.0375103	0.495133	1.14415	0.568864	2.83976	1.56447	0.199804
YHL021C	AIM17	4	0.649667	0.213041	0.0334995	0.793179	0.212878	0.031733	0.543721	0.0791937	0.0191776
YHL022C	SPO11	4	0.383522	0.511082	0.313055	0.20225	0.474485	0.574576	-0.093594	1.45067	0.961963
YHL023C	NPR3	4	-2.02894	0.652228	0.0324088	-0.653982	0.623025	0.232663	2.30984	1.20054	0.184234
YHL026C	YHL026C	4	0.713977	0.599919	0.163772	0.315285	0.13566	0.0693565	-0.430538	0.920199	0.685001
YHL027W	RIM101	3	-0.130811	1.13726	0.890996	0.395122	1.17108	0.713198	1.10124	0.838157	0.40965
YHL028W	WSC4	4	0.968781	1.23801	0.297381	0.329066	1.26275	0.729929	-0.823727	0.354574	0.138018
YHL029C	OCA5	4	2.49112	0.454627	0.0127323	1.32321	0.422035	0.0428853	-1.5154	1.04832	0.269574
YHL030W	ECM29	4	0.532508	0.742588	0.330202	-0.648794	1.15843	0.467277	-1.88514	1.21477	0.24764
YHL032C	GUT1	4	1.52078	0.298235	0.0141854	1.32675	0.496942	0.0561281	0.0837688	0.673116	0.923896
YHL034C	SBP1	3	-8.37886	1.52306	0.0376204	-7.71926	1.057	0.0362085	-0.11031	0.901092	0.937677
YHL036W	MUP3	4	0.370422	0.449953	0.277586	0.0517154	0.381156	0.86118	-0.345729	0.416432	0.468765
YHL038C	CBP2	4	-13.681	0.618649	0.00143791	9.84504	0.999565	0.00742931	40.5204	1.21766	0.000438299
YHL040C	ARN1	4	1.59093	0.825191	0.0730147	1.74465	0.860642	0.0861462	0.728277	0.269351	0.110264
YHL041W	YHL041W	4	0.253215	0.595959	0.541527	-0.0456053	0.41128	0.888612	-0.33025	0.364112	0.433923
YHL042W	YHL042W	4	1.5151	0.706189	0.0605359	1.18551	0.870897	0.159593	-0.163643	0.464768	0.763485
YHL043W	ECM34	4	-0.423164	0.499959	0.267691	-0.281281	0.22123	0.177218	0.351568	0.565237	0.585403
YHL044W	YHL044W	4	-0.23054	0.196384	0.166726	-0.367833	0.245504	0.138093	-0.121939	0.431255	0.8113
YHL045W	YHL045W	4	0.920374	0.600896	0.108876	0.945208	0.623911	0.135938	0.375732	0.511035	0.517478
YHL046C	PAU13	4	0.642908	0.575766	0.179662	0.291016	0.59874	0.524917	-0.358	0.43526	0.469818
YHL047C	ARN2	4	0.845902	0.371369	0.0545206	0.248976	0.151685	0.119461	-0.767617	0.740341	0.379465
YHR001W-A	QCR10	4	-0.497009	0.669431	0.316943	-0.598729	0.351626	0.112367	-0.104266	0.761988	0.914799
YHR010W	RPL27A	4	-3.73768	0.312082	0.00339655	-3.41466	0.63496	0.0173295	0.0963298	1.04725	0.944762
YHR012W	VPS29	4	-3.26556	0.434806	0.00763877	-2.44153	0.46135	0.0177741	1.0903	0.404948	0.110746
YHR014W	SPO13	4	0.681229	0.229525	0.0352695	0.618	0.339205	0.101006	0.17348	0.759471	0.84777
YHR015W	MIP6	4	-0.256496	0.541541	0.499368	-0.221224	0.427111	0.498977	0.187167	0.368164	0.660878
YHR022C	YHR022C	4	0.069835	0.678287	0.883304	0.00461004	0.54889	0.990703	0.0620338	0.625436	0.938336
YHR028C	DAP2	4	-0.480731	0.147611	0.0299674	-0.271076	0.419235	0.410484	0.46461	0.595626	0.4923
YHR029C	YHI9	4	-0.738634	0.365176	0.067139	-0.793263	0.863788	0.277129	-0.0612762	1.00283	0.964852
YHR030C	SLT2	4	-0.612975	0.453625	0.133527	-0.178908	0.212346	0.308381	0.849219	0.926119	0.428009
YHR031C	RRM3	4	0.468906	0.612994	0.306293	-0.133052	0.479738	0.713034	-0.843246	0.295785	0.103427
YHR034C	PIH1	1	0.767048	NA	NA	0.823824	NA	NA	0.406755	NA	NA
YHR035W	NEL1	4	0.398533	0.281319	0.123533	-0.315039	0.811385	0.608637	-1.05854	1.03916	0.387686
YHR037W	PUT2	4	0.230483	1.28077	0.795516	0.022489	1.27833	0.981348	-0.169157	0.900605	0.880684
YHR046C	INM1	4	-0.983847	0.181076	0.0129075	-0.510503	0.342078	0.138775	0.855212	0.464879	0.196018
YHR048W	YHK8	4	-0.300955	0.104853	0.0370632	-0.364753	0.157438	0.0698247	-0.000760276	0.393827	0.998818
YHR049C-A	YHR049C-A	4	0.344588	0.252295	0.131079	0.0116841	0.394489	0.968649	-0.376092	0.503969	0.512152
YHR049W	FSH1	4	1.0697	0.23425	0.0169037	2.55411	0.296151	0.00861842	3.05524	0.583562	0.0344359
YHR050W	SMF2	4	0.977061	0.210408	0.0164067	0.781821	0.674991	0.203354	-0.0143156	0.97108	0.991481
YHR057C	CPR2	4	-0.969987	0.404847	0.0503718	-0.830375	0.341809	0.0647792	0.251008	0.72949	0.768747
YHR061C	GIC1	4	1.06862	0.580034	0.0791347	0.933473	0.639949	0.143994	0.111067	0.655086	0.895625
YHR073W	OSH3	4	0.559538	0.347311	0.0998958	0.177189	0.498393	0.64009	-0.428064	1.23286	0.766209
YHR075C	PPE1	4	-0.403796	0.472107	0.26408	-0.107834	0.186565	0.454701	0.635063	0.525245	0.328037
YHR076W	PTC7	4	-1.10719	0.182427	0.0109741	-0.677138	0.897818	0.350415	0.754766	1.40848	0.644512
YHR077C	NMD2	4	4.63834	0.41673	0.00387948	5.17384	0.693544	0.0105697	1.95965	0.978782	0.174441
YHR079C	IRE1	3	-1.96701	0.426526	0.0466155	-1.8085	0.591972	0.0975917	0.109544	0.466391	0.875056
YHR080C	YHR080C	4	0.266681	0.175501	0.11043	0.451626	0.374943	0.192755	0.551497	0.434788	0.315027
[truncated: 2,284 more rows]
