# Supplementary figures and images for: Cooperation of mitochondrial and ER factors in quality control of tail-anchored proteins
Source: eLife journal article supplement (doi:10.7554/elife.45506), 2019-06-07

**Figure 4 - figure supplement 1 Dederer *et al.***

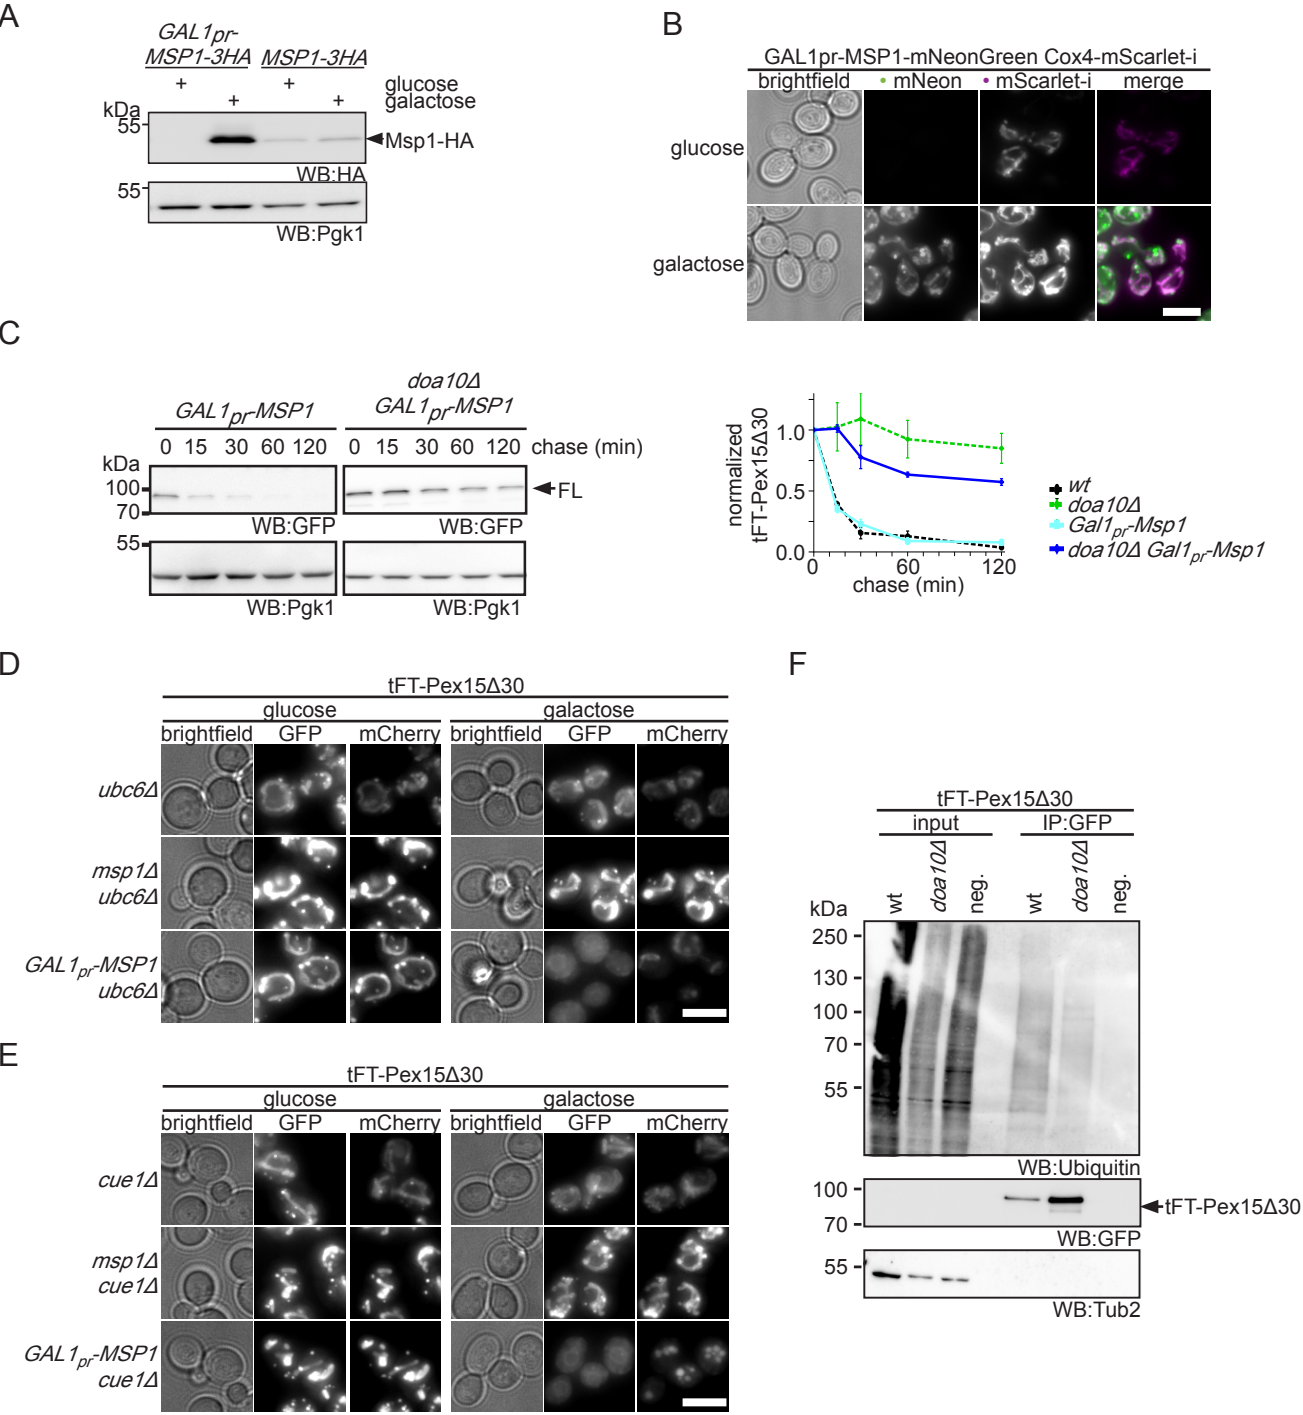

Supplement: supp [file elife-45506-supp-v1.zip › elife_poa_e45506_Figure_4_figure_supplement_1.pdf]

**Figure 3 - figure supplement 1 Dederer *et al.***

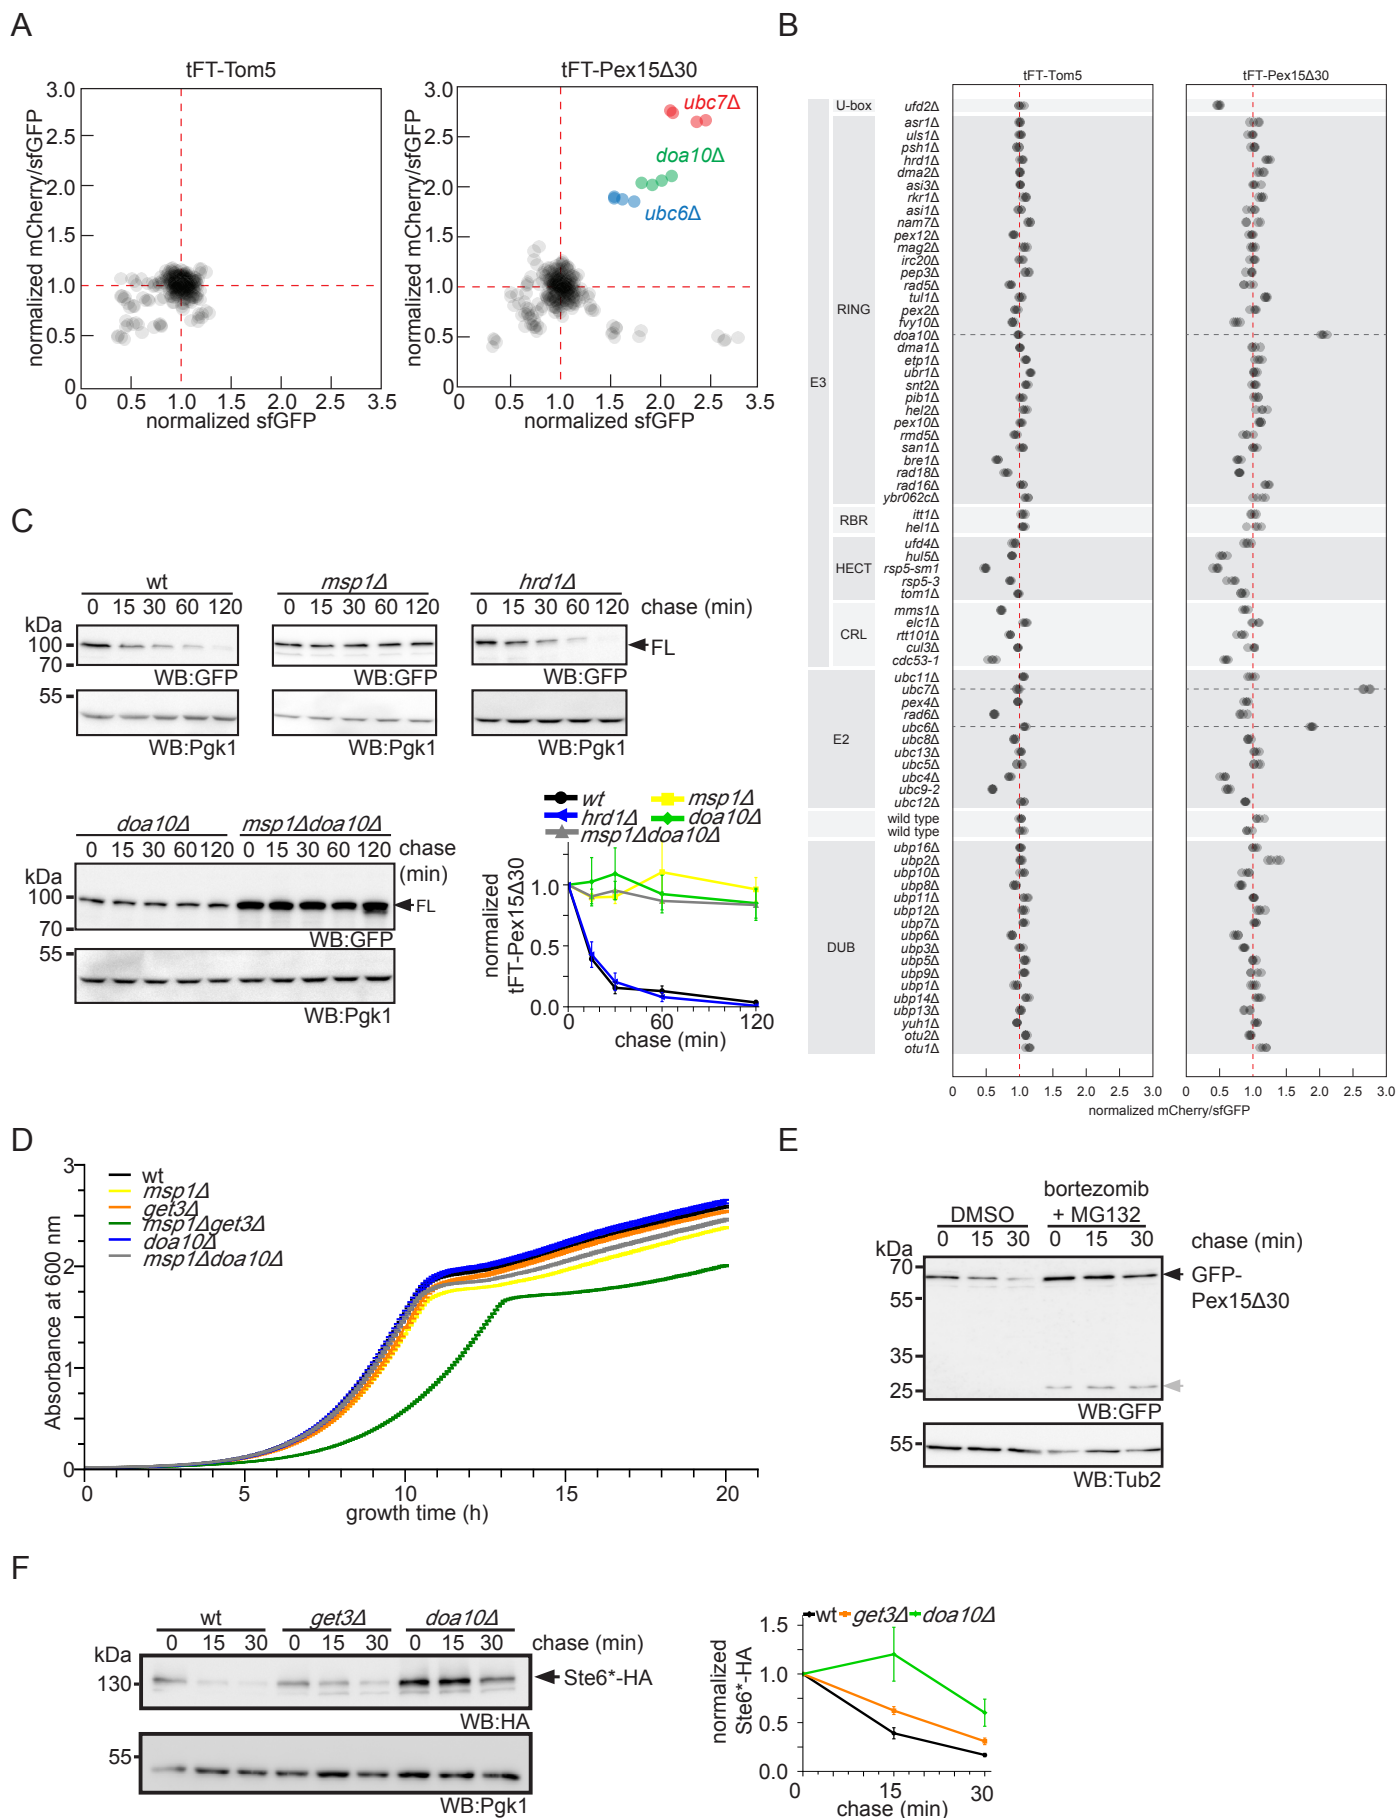

Supplement: supp [file elife-45506-supp-v1.zip › elife_poa_e45506_Figure_3_figure_supplement_1.pdf]

**Figure 6 - figure supplement 1 Dederer *et al.***

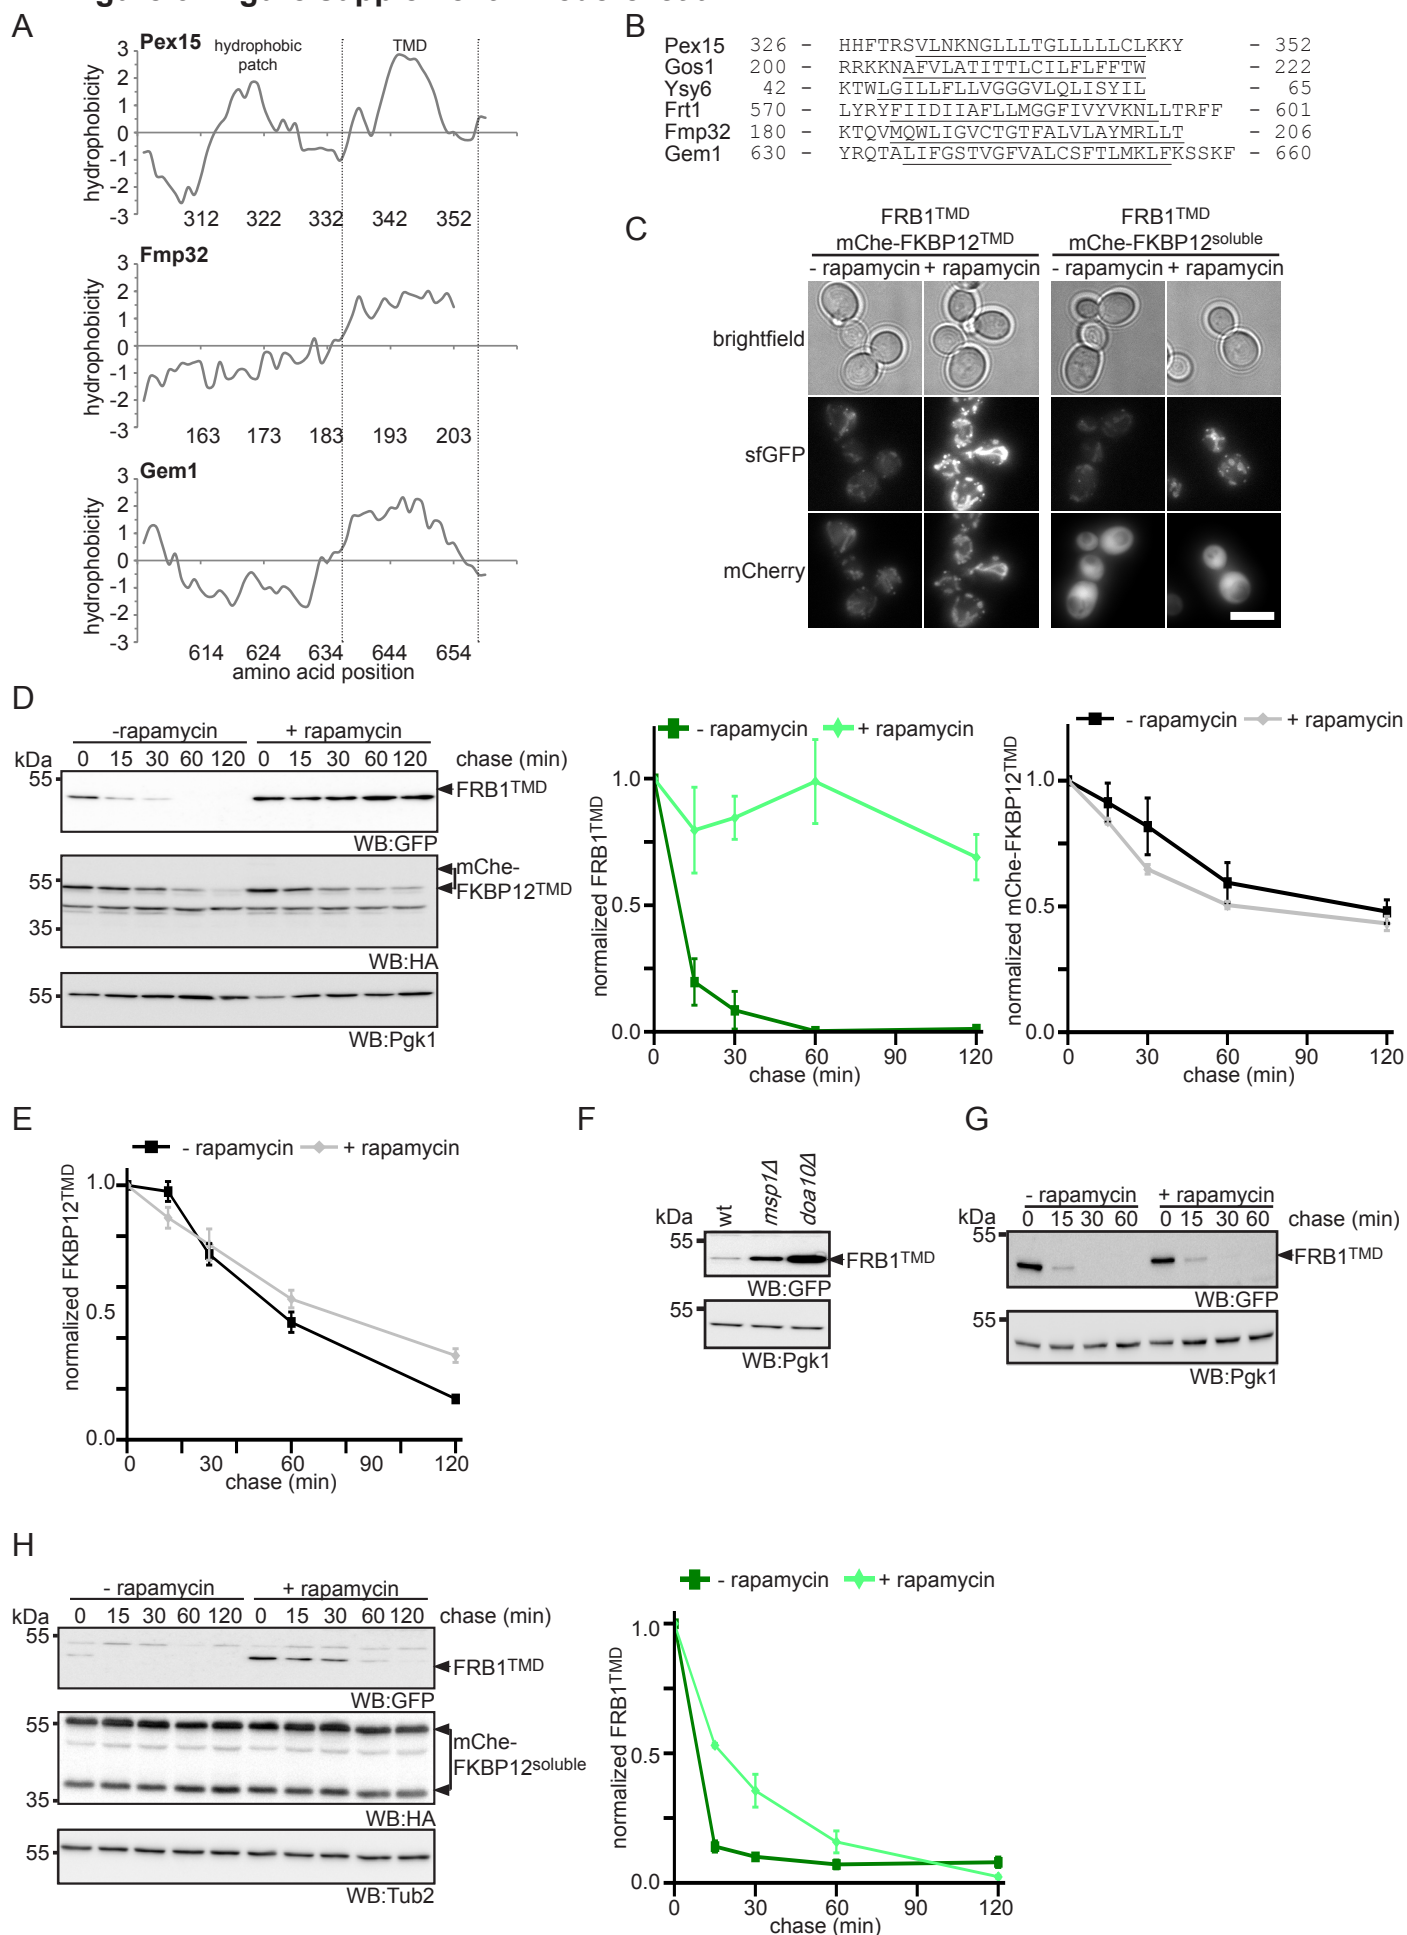

Supplement: supp [file elife-45506-supp-v1.zip › elife_poa_e45506_Figure_6_figure_supplement_1.pdf]

Figure 5 - figure supplement 1 Dederer *et al.*

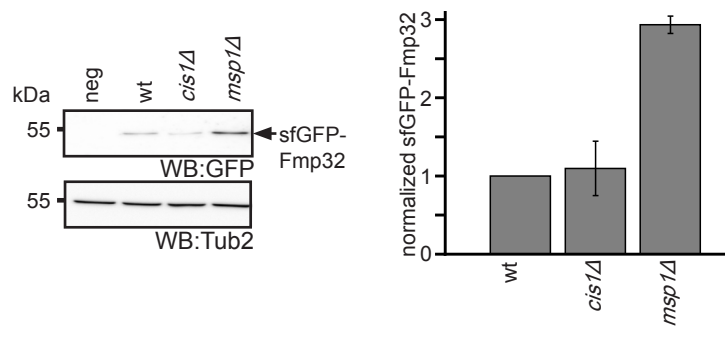

Supplement: supp [file elife-45506-supp-v1.zip › elife_poa_e45506_Figure_5_figure_supplement_1.pdf]

Figure 2 - figure supplement 1 Dederer *et al.*

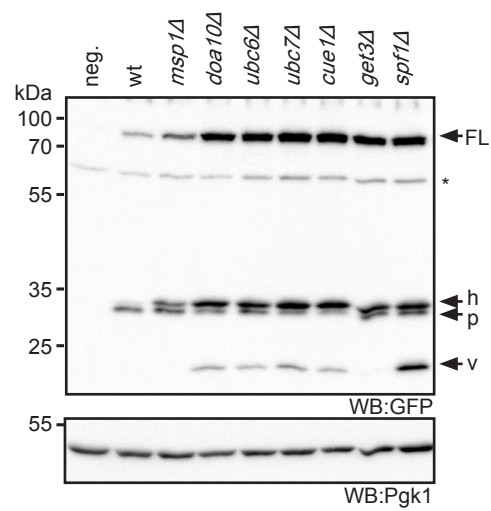

Supplement: supp [file elife-45506-supp-v1.zip › elife_poa_e45506_Figure_2_figure_supplement_1.pdf]

Figure 1 - figure supplement 1 Dederer *et al.*

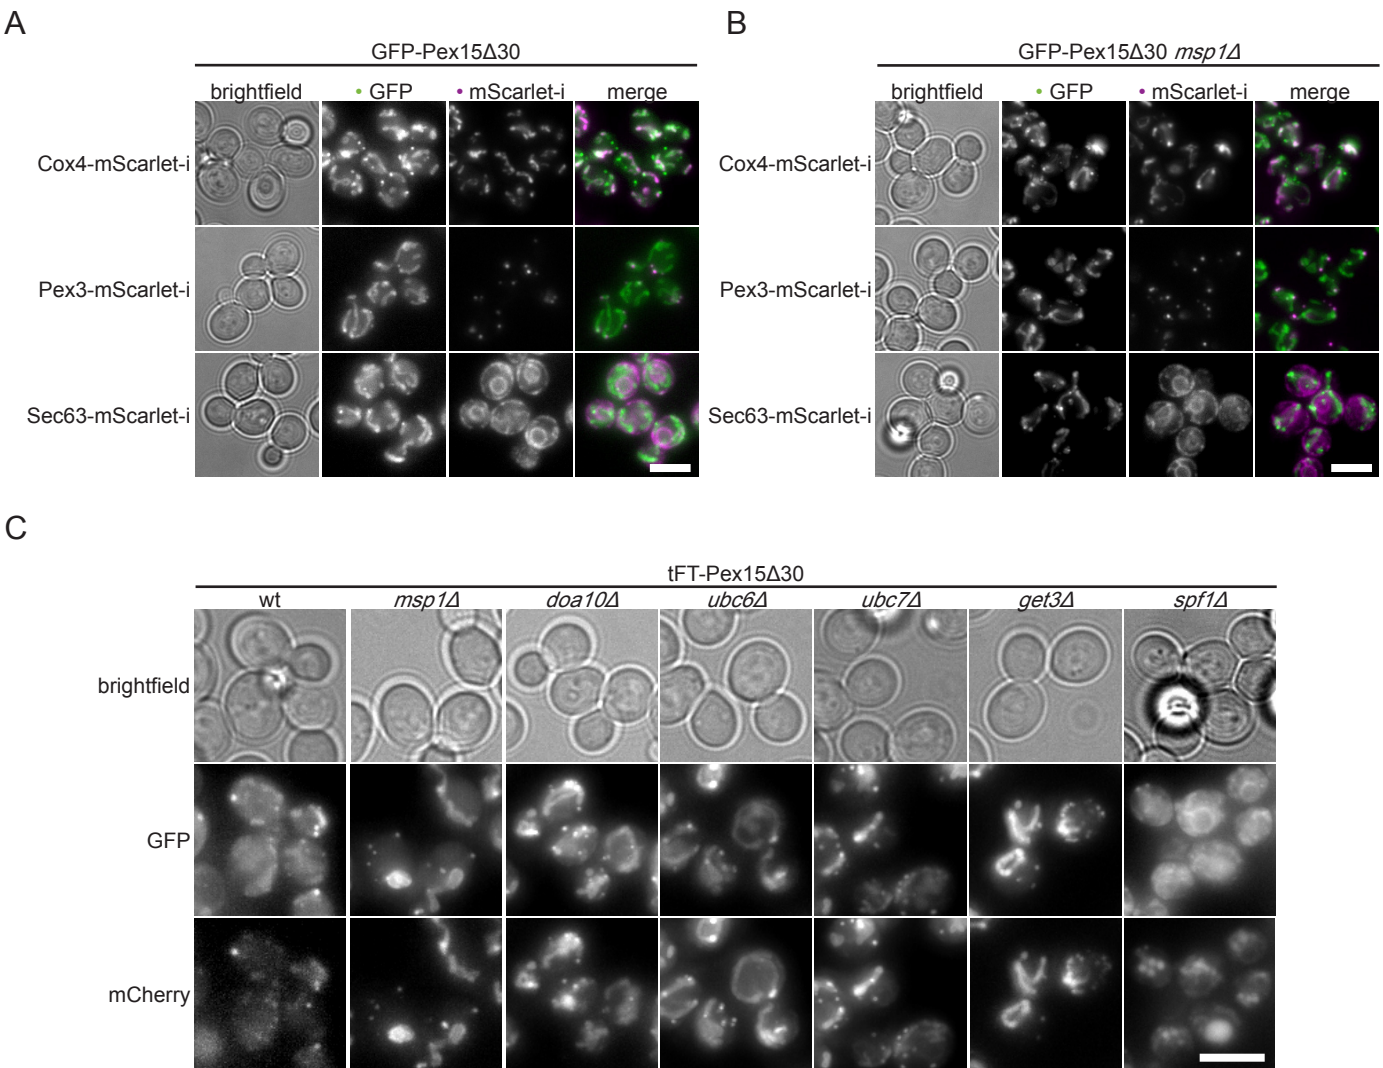

Supplement: supp [file elife-45506-supp-v1.zip › elife_poa_e45506_Figure_1_figure_supplement_1.pdf]
